# Supplementary material for: Effect of Inflammatory Microenvironment on the Regenerative Capacity of Adipose-Derived Mesenchymal Stem Cells
Source: Cells. 2023 Jul 29;12(15):1966. doi: 10.3390/cells12151966 (PMC10416993; doi:10.3390/cells12151966)
Supplement: Supplementary file 1 [file cells-12-01966-s001.zip]

Archive with 4 entries (4 files):
- cells-2445671-supplementary-material_withfigures_SzucsD.pdf
- supplementary table S1.xlsx
- supplementary table S2.xlsx
- supplementary table S3.xlsx
