# Supplementary material for: Effect of Inflammatory Microenvironment on the Regenerative Capacity of Adipose-Derived Mesenchymal Stem Cells
Source: Cells. 2023 Jul 29;12(15):1966. doi: 10.3390/cells12151966 (PMC10416993; doi:10.3390/cells12151966)
Supplement: Supplementary file 1 [file cells-12-01966-s001.zip › supplementary table S1.xlsx]

## Sheet: gsea_GO_LPS
	ONTOLOGY	ID	Description	setSize	enrichmentScore	NES	pvalue	p.adjust	qvalues	rank	leading_edge	core_enrichment
GO:0000280	BP	GO:0000280	nuclear division	123	0.728643555984107	3.26002395848232	0.000117716303708064	0.0021264953618104	0.00145866135019434	316	tags=70%, list=20%, signal=61%	ENSG00000066279/ENSG00000148773/ENSG00000138778/ENSG00000131747/ENSG00000186185/ENSG00000117724/ENSG00000117650/ENSG00000121621/ENSG00000112742/ENSG00000143228/ENSG00000118193/ENSG00000109805/ENSG00000121152/ENSG00000237649/ENSG00000163808/ENSG00000137804/ENSG00000156970/ENSG00000129810/ENSG00000156509/ENSG00000178999/ENSG00000138182/ENSG00000011426/ENSG00000138160/ENSG00000126787/ENSG00000142945…
GO:1903047	BP	GO:1903047	mitotic cell cycle process	189	0.691957846626532	3.25676319913783	0.000111831804965332	0.0021264953618104	0.00145866135019434	329	tags=62%, list=20%, signal=56%	ENSG00000148773/ENSG00000138778/ENSG00000183856/ENSG00000186185/ENSG00000117724/ENSG00000117650/ENSG00000121621/ENSG00000112742/ENSG00000143228/ENSG00000118193/ENSG00000170312/ENSG00000109805/ENSG00000121152/ENSG00000171848/ENSG00000237649/ENSG00000163808/ENSG00000137804/ENSG00000156970/ENSG00000129810/ENSG00000156509/ENSG00000178999/ENSG00000138182/ENSG00000011426/ENSG00000138160/ENSG00000126787…
GO:0048285	BP	GO:0048285	organelle fission	130	0.712088491157162	3.20549167027917	0.00011731581417175	0.0021264953618104	0.00145866135019434	316	tags=67%, list=20%, signal=59%	ENSG00000066279/ENSG00000148773/ENSG00000138778/ENSG00000131747/ENSG00000186185/ENSG00000117724/ENSG00000117650/ENSG00000121621/ENSG00000112742/ENSG00000143228/ENSG00000118193/ENSG00000109805/ENSG00000121152/ENSG00000237649/ENSG00000163808/ENSG00000137804/ENSG00000156970/ENSG00000129810/ENSG00000156509/ENSG00000178999/ENSG00000138182/ENSG00000011426/ENSG00000138160/ENSG00000126787/ENSG00000142945…
GO:0007059	BP	GO:0007059	chromosome segregation	119	0.710736059488492	3.16343973152083	0.000118891927238141	0.0021264953618104	0.00145866135019434	308	tags=64%, list=19%, signal=56%	ENSG00000148773/ENSG00000138778/ENSG00000131747/ENSG00000186185/ENSG00000117724/ENSG00000117650/ENSG00000121621/ENSG00000112742/ENSG00000137812/ENSG00000143228/ENSG00000118193/ENSG00000109805/ENSG00000154839/ENSG00000121152/ENSG00000171320/ENSG00000123485/ENSG00000237649/ENSG00000137804/ENSG00000156970/ENSG00000129810/ENSG00000178999/ENSG00000126787/ENSG00000152253/ENSG00000142945/ENSG00000090889…
GO:0140014	BP	GO:0140014	mitotic nuclear division	95	0.733661642506157	3.15622780276635	0.000122729504172803	0.0021264953618104	0.00145866135019434	301	tags=69%, list=19%, signal=60%	ENSG00000148773/ENSG00000138778/ENSG00000186185/ENSG00000117724/ENSG00000117650/ENSG00000121621/ENSG00000112742/ENSG00000143228/ENSG00000118193/ENSG00000109805/ENSG00000121152/ENSG00000237649/ENSG00000163808/ENSG00000137804/ENSG00000156970/ENSG00000129810/ENSG00000156509/ENSG00000178999/ENSG00000138182/ENSG00000011426/ENSG00000138160/ENSG00000126787/ENSG00000142945/ENSG00000090889/ENSG00000135476…
GO:0010564	BP	GO:0010564	regulation of cell cycle process	146	0.686428700401727	3.13402161791411	0.000116090085906664	0.0021264953618104	0.00145866135019434	302	tags=60%, list=19%, signal=54%	ENSG00000148773/ENSG00000138778/ENSG00000117724/ENSG00000117650/ENSG00000112742/ENSG00000118193/ENSG00000170312/ENSG00000129173/ENSG00000171848/ENSG00000163808/ENSG00000137804/ENSG00000156970/ENSG00000156509/ENSG00000178999/ENSG00000138182/ENSG00000011426/ENSG00000138160/ENSG00000126787/ENSG00000135476/ENSG00000075218/ENSG00000076382/ENSG00000169679/ENSG00000137807/ENSG00000117399/ENSG00000154920…
GO:0098813	BP	GO:0098813	nuclear chromosome segregation	98	0.723172890127584	3.12363634067663	0.000122804863072578	0.0021264953618104	0.00145866135019434	261	tags=63%, list=16%, signal=56%	ENSG00000138778/ENSG00000131747/ENSG00000186185/ENSG00000117724/ENSG00000117650/ENSG00000121621/ENSG00000112742/ENSG00000137812/ENSG00000143228/ENSG00000118193/ENSG00000109805/ENSG00000121152/ENSG00000171320/ENSG00000237649/ENSG00000137804/ENSG00000156970/ENSG00000129810/ENSG00000178999/ENSG00000126787/ENSG00000152253/ENSG00000142945/ENSG00000090889/ENSG00000135476/ENSG00000076382/ENSG00000169679…
GO:0000070	BP	GO:0000070	mitotic sister chromatid segregation	71	0.753346126056386	3.09982861147455	0.000127730233746328	0.0021264953618104	0.00145866135019434	261	tags=69%, list=16%, signal=61%	ENSG00000138778/ENSG00000186185/ENSG00000117724/ENSG00000117650/ENSG00000121621/ENSG00000112742/ENSG00000143228/ENSG00000118193/ENSG00000109805/ENSG00000121152/ENSG00000237649/ENSG00000137804/ENSG00000156970/ENSG00000129810/ENSG00000178999/ENSG00000126787/ENSG00000142945/ENSG00000090889/ENSG00000135476/ENSG00000076382/ENSG00000169679/ENSG00000137807/ENSG00000117399/ENSG00000080986/ENSG00000175063…
GO:0000819	BP	GO:0000819	sister chromatid segregation	77	0.743197599630666	3.09418707236111	0.000126694539465349	0.0021264953618104	0.00145866135019434	261	tags=66%, list=16%, signal=58%	ENSG00000138778/ENSG00000131747/ENSG00000186185/ENSG00000117724/ENSG00000117650/ENSG00000121621/ENSG00000112742/ENSG00000143228/ENSG00000118193/ENSG00000109805/ENSG00000121152/ENSG00000171320/ENSG00000237649/ENSG00000137804/ENSG00000156970/ENSG00000129810/ENSG00000178999/ENSG00000126787/ENSG00000142945/ENSG00000090889/ENSG00000135476/ENSG00000076382/ENSG00000169679/ENSG00000137807/ENSG00000117399…
GO:0051301	BP	GO:0051301	cell division	164	0.661150779785249	3.0618430861682	0.000114207400639561	0.0021264953618104	0.00145866135019434	299	tags=57%, list=19%, signal=52%	ENSG00000066279/ENSG00000186871/ENSG00000138778/ENSG00000131747/ENSG00000186185/ENSG00000117724/ENSG00000117650/ENSG00000137812/ENSG00000143228/ENSG00000118193/ENSG00000170312/ENSG00000109805/ENSG00000154839/ENSG00000121152/ENSG00000129173/ENSG00000237649/ENSG00000137804/ENSG00000156970/ENSG00000129810/ENSG00000178999/ENSG00000138182/ENSG00000011426/ENSG00000138160/ENSG00000152253/ENSG00000142945…
GO:0051276	BP	GO:0051276	chromosome organization	191	0.635523982104762	2.99484690591038	0.000111656989727557	0.0021264953618104	0.00145866135019434	312	tags=51%, list=19%, signal=46%	ENSG00000186871/ENSG00000148773/ENSG00000138778/ENSG00000131747/ENSG00000186185/ENSG00000117724/ENSG00000117650/ENSG00000121621/ENSG00000112742/ENSG00000143228/ENSG00000118193/ENSG00000170312/ENSG00000109805/ENSG00000121152/ENSG00000171320/ENSG00000123485/ENSG00000237649/ENSG00000137804/ENSG00000156970/ENSG00000129810/ENSG00000178999/ENSG00000126787/ENSG00000142945/ENSG00000090889/ENSG00000135476…
GO:0044770	BP	GO:0044770	cell cycle phase transition	112	0.677793800510438	2.98568451829757	0.00012025012025012	0.0021264953618104	0.00145866135019434	302	tags=62%, list=19%, signal=55%	ENSG00000138778/ENSG00000183856/ENSG00000117724/ENSG00000112742/ENSG00000118193/ENSG00000170312/ENSG00000171848/ENSG00000156970/ENSG00000178999/ENSG00000011426/ENSG00000126787/ENSG00000135476/ENSG00000075218/ENSG00000169679/ENSG00000154920/ENSG00000136492/ENSG00000080986/ENSG00000175063/ENSG00000101447/ENSG00000158402/ENSG00000093009/ENSG00000197299/ENSG00000127564/ENSG00000092853/ENSG00000145386…
GO:0051726	BP	GO:0051726	regulation of cell cycle	194	0.627835804176595	2.96762822644458	0.000110926234054354	0.0021264953618104	0.00145866135019434	302	tags=53%, list=19%, signal=49%	ENSG00000066279/ENSG00000148773/ENSG00000138778/ENSG00000117724/ENSG00000117650/ENSG00000112742/ENSG00000118193/ENSG00000170312/ENSG00000129173/ENSG00000171848/ENSG00000163808/ENSG00000137804/ENSG00000156970/ENSG00000156509/ENSG00000178999/ENSG00000138182/ENSG00000011426/ENSG00000138160/ENSG00000126787/ENSG00000135476/ENSG00000075218/ENSG00000076382/ENSG00000169679/ENSG00000137807/ENSG00000117399…
GO:1901987	BP	GO:1901987	regulation of cell cycle phase transition	90	0.6916084791243	2.9521208624234	0.000123609394313968	0.0021264953618104	0.00145866135019434	325	tags=68%, list=20%, signal=57%	ENSG00000138778/ENSG00000117724/ENSG00000112742/ENSG00000118193/ENSG00000170312/ENSG00000171848/ENSG00000156970/ENSG00000178999/ENSG00000011426/ENSG00000126787/ENSG00000135476/ENSG00000075218/ENSG00000169679/ENSG00000154920/ENSG00000136492/ENSG00000080986/ENSG00000175063/ENSG00000101447/ENSG00000158402/ENSG00000093009/ENSG00000197299/ENSG00000092853/ENSG00000012048/ENSG00000087586/ENSG00000144554…
GO:0000775	CC	GO:0000775	chromosome, centromeric region	83	0.6987940904357	2.95205753352122	0.000124362641462505	0.0021264953618104	0.00145866135019434	299	tags=64%, list=19%, signal=55%	ENSG00000186871/ENSG00000138778/ENSG00000131747/ENSG00000117724/ENSG00000117650/ENSG00000121621/ENSG00000112742/ENSG00000137812/ENSG00000143228/ENSG00000109805/ENSG00000154839/ENSG00000171320/ENSG00000123485/ENSG00000156970/ENSG00000129810/ENSG00000178999/ENSG00000152253/ENSG00000142945/ENSG00000076382/ENSG00000169679/ENSG00000080986/ENSG00000163535/ENSG00000115163/ENSG00000165480/ENSG00000134690…
GO:0005819	CC	GO:0005819	spindle	102	0.676858130545784	2.94394824817366	0.000121802679658953	0.0021264953618104	0.00145866135019434	301	tags=59%, list=19%, signal=51%	ENSG00000066279/ENSG00000138778/ENSG00000186185/ENSG00000117724/ENSG00000117650/ENSG00000121621/ENSG00000112742/ENSG00000118193/ENSG00000169607/ENSG00000170312/ENSG00000154839/ENSG00000237649/ENSG00000163808/ENSG00000137804/ENSG00000156970/ENSG00000129810/ENSG00000178999/ENSG00000138182/ENSG00000072571/ENSG00000138160/ENSG00000126787/ENSG00000142945/ENSG00000090889/ENSG00000135476/ENSG00000076382…
GO:0098687	CC	GO:0098687	chromosomal region	113	0.657603312245504	2.90365263023783	0.000119774823332136	0.0021264953618104	0.00145866135019434	318	tags=58%, list=20%, signal=50%	ENSG00000186871/ENSG00000138778/ENSG00000131747/ENSG00000117724/ENSG00000117650/ENSG00000121621/ENSG00000112742/ENSG00000137812/ENSG00000143228/ENSG00000170312/ENSG00000109805/ENSG00000154839/ENSG00000171320/ENSG00000123485/ENSG00000156970/ENSG00000129810/ENSG00000178999/ENSG00000152253/ENSG00000142945/ENSG00000076382/ENSG00000169679/ENSG00000080986/ENSG00000163535/ENSG00000100206/ENSG00000115163…
GO:0007346	BP	GO:0007346	regulation of mitotic cell cycle	99	0.670286991070618	2.89685086177345	0.00012291052114061	0.0021264953618104	0.00145866135019434	302	tags=63%, list=19%, signal=54%	ENSG00000148773/ENSG00000138778/ENSG00000117724/ENSG00000117650/ENSG00000112742/ENSG00000118193/ENSG00000170312/ENSG00000171848/ENSG00000137804/ENSG00000156970/ENSG00000156509/ENSG00000178999/ENSG00000138182/ENSG00000011426/ENSG00000126787/ENSG00000135476/ENSG00000075218/ENSG00000169679/ENSG00000154920/ENSG00000080986/ENSG00000175063/ENSG00000158402/ENSG00000197299/ENSG00000127564/ENSG00000184661…
GO:0000793	CC	GO:0000793	condensed chromosome	88	0.680529852248373	2.89673572633952	0.000123915737298637	0.0021264953618104	0.00145866135019434	329	tags=65%, list=20%, signal=55%	ENSG00000186871/ENSG00000148773/ENSG00000138778/ENSG00000131747/ENSG00000117724/ENSG00000117650/ENSG00000121621/ENSG00000112742/ENSG00000137812/ENSG00000143228/ENSG00000109805/ENSG00000154839/ENSG00000123485/ENSG00000156970/ENSG00000129810/ENSG00000178999/ENSG00000152253/ENSG00000142945/ENSG00000076382/ENSG00000169679/ENSG00000080986/ENSG00000163535/ENSG00000100206/ENSG00000115163/ENSG00000197299…
GO:0051783	BP	GO:0051783	regulation of nuclear division	39	0.787807336476215	2.88457980659707	0.000139159476760367	0.0021264953618104	0.00145866135019434	288	tags=82%, list=18%, signal=69%	ENSG00000148773/ENSG00000117724/ENSG00000117650/ENSG00000112742/ENSG00000137804/ENSG00000156970/ENSG00000156509/ENSG00000178999/ENSG00000138182/ENSG00000126787/ENSG00000135476/ENSG00000169679/ENSG00000117399/ENSG00000080986/ENSG00000158402/ENSG00000127564/ENSG00000111247/ENSG00000184661/ENSG00000087586/ENSG00000166851/ENSG00000164109/ENSG00000122952/ENSG00000184445/ENSG00000071539/ENSG00000134057…
GO:0044772	BP	GO:0044772	mitotic cell cycle phase transition	99	0.663617092414995	2.86802484854944	0.00012291052114061	0.0021264953618104	0.00145866135019434	302	tags=62%, list=19%, signal=53%	ENSG00000138778/ENSG00000183856/ENSG00000117724/ENSG00000112742/ENSG00000118193/ENSG00000170312/ENSG00000171848/ENSG00000156970/ENSG00000178999/ENSG00000011426/ENSG00000126787/ENSG00000135476/ENSG00000075218/ENSG00000169679/ENSG00000080986/ENSG00000175063/ENSG00000158402/ENSG00000197299/ENSG00000127564/ENSG00000092853/ENSG00000145386/ENSG00000013810/ENSG00000012048/ENSG00000087586/ENSG00000157456…
GO:0051321	BP	GO:0051321	meiotic cell cycle	68	0.699264964111259	2.85027201306445	0.000128882587962366	0.0021264953618104	0.00145866135019434	310	tags=71%, list=19%, signal=60%	ENSG00000066279/ENSG00000131747/ENSG00000117650/ENSG00000121621/ENSG00000112742/ENSG00000143228/ENSG00000121152/ENSG00000156970/ENSG00000129810/ENSG00000156509/ENSG00000135476/ENSG00000169679/ENSG00000117399/ENSG00000174371/ENSG00000154920/ENSG00000136492/ENSG00000080986/ENSG00000185697/ENSG00000158402/ENSG00000163535/ENSG00000100206/ENSG00000127564/ENSG00000085999/ENSG00000111247/ENSG00000187741…
GO:1901990	BP	GO:1901990	regulation of mitotic cell cycle phase transition	76	0.684416712006522	2.84458208072373	0.00012685525815045	0.0021264953618104	0.00145866135019434	302	tags=66%, list=19%, signal=56%	ENSG00000138778/ENSG00000117724/ENSG00000112742/ENSG00000118193/ENSG00000170312/ENSG00000171848/ENSG00000156970/ENSG00000178999/ENSG00000011426/ENSG00000126787/ENSG00000135476/ENSG00000075218/ENSG00000169679/ENSG00000080986/ENSG00000175063/ENSG00000158402/ENSG00000197299/ENSG00000092853/ENSG00000012048/ENSG00000087586/ENSG00000143476/ENSG00000166851/ENSG00000164109/ENSG00000154734/ENSG00000094804…
GO:0007088	BP	GO:0007088	regulation of mitotic nuclear division	36	0.791369035482275	2.8427445752402	0.000141302811925957	0.0021264953618104	0.00145866135019434	288	tags=83%, list=18%, signal=70%	ENSG00000148773/ENSG00000117724/ENSG00000117650/ENSG00000112742/ENSG00000137804/ENSG00000156970/ENSG00000156509/ENSG00000178999/ENSG00000138182/ENSG00000126787/ENSG00000135476/ENSG00000169679/ENSG00000080986/ENSG00000158402/ENSG00000127564/ENSG00000184661/ENSG00000087586/ENSG00000166851/ENSG00000164109/ENSG00000122952/ENSG00000184445/ENSG00000071539/ENSG00000134057/ENSG00000167513/ENSG00000112029…
GO:0000776	CC	GO:0000776	kinetochore	62	0.708312137741998	2.83598715273609	0.000130616509926855	0.0021264953618104	0.00145866135019434	288	tags=65%, list=18%, signal=55%	ENSG00000186871/ENSG00000138778/ENSG00000117724/ENSG00000117650/ENSG00000121621/ENSG00000112742/ENSG00000137812/ENSG00000143228/ENSG00000154839/ENSG00000123485/ENSG00000156970/ENSG00000129810/ENSG00000178999/ENSG00000152253/ENSG00000142945/ENSG00000076382/ENSG00000169679/ENSG00000080986/ENSG00000163535/ENSG00000115163/ENSG00000165480/ENSG00000102384/ENSG00000089685/ENSG00000151725/ENSG00000123219…
GO:0000226	BP	GO:0000226	microtubule cytoskeleton organization	114	0.639488688993669	2.82903872420962	0.000119502868068834	0.0021264953618104	0.00145866135019434	301	tags=54%, list=19%, signal=48%	ENSG00000066279/ENSG00000138778/ENSG00000186185/ENSG00000117650/ENSG00000121621/ENSG00000112742/ENSG00000143228/ENSG00000170312/ENSG00000154839/ENSG00000237649/ENSG00000163808/ENSG00000137804/ENSG00000129810/ENSG00000178999/ENSG00000138160/ENSG00000126787/ENSG00000152253/ENSG00000142945/ENSG00000090889/ENSG00000135476/ENSG00000076382/ENSG00000137807/ENSG00000117399/ENSG00000080986/ENSG00000115163…
GO:0000779	CC	GO:0000779	condensed chromosome, centromeric region	66	0.695466933668193	2.81820292259063	0.000129449838187702	0.0021264953618104	0.00145866135019434	299	tags=64%, list=19%, signal=54%	ENSG00000186871/ENSG00000138778/ENSG00000117724/ENSG00000117650/ENSG00000121621/ENSG00000112742/ENSG00000137812/ENSG00000143228/ENSG00000109805/ENSG00000154839/ENSG00000123485/ENSG00000156970/ENSG00000129810/ENSG00000178999/ENSG00000152253/ENSG00000142945/ENSG00000076382/ENSG00000169679/ENSG00000080986/ENSG00000163535/ENSG00000115163/ENSG00000165480/ENSG00000102384/ENSG00000089685/ENSG00000151725…
GO:1902850	BP	GO:1902850	microtubule cytoskeleton organization involved in mitosis	46	0.745823980476023	2.81474511873635	0.000136780194227876	0.0021264953618104	0.00145866135019434	292	tags=72%, list=18%, signal=60%	ENSG00000138778/ENSG00000117650/ENSG00000112742/ENSG00000143228/ENSG00000237649/ENSG00000163808/ENSG00000137804/ENSG00000178999/ENSG00000138160/ENSG00000126787/ENSG00000152253/ENSG00000090889/ENSG00000135476/ENSG00000137807/ENSG00000117399/ENSG00000080986/ENSG00000115163/ENSG00000088325/ENSG00000198901/ENSG00000186193/ENSG00000101057/ENSG00000075702/ENSG00000013810/ENSG00000087586/ENSG00000166851…
GO:0007017	BP	GO:0007017	microtubule-based process	132	0.618961483032748	2.79272189905008	0.000117137167623287	0.0021264953618104	0.00145866135019434	301	tags=50%, list=19%, signal=44%	ENSG00000066279/ENSG00000138778/ENSG00000186185/ENSG00000117650/ENSG00000121621/ENSG00000112742/ENSG00000143228/ENSG00000118193/ENSG00000170312/ENSG00000154839/ENSG00000237649/ENSG00000163808/ENSG00000137804/ENSG00000129810/ENSG00000178999/ENSG00000138182/ENSG00000138160/ENSG00000126787/ENSG00000152253/ENSG00000142945/ENSG00000090889/ENSG00000135476/ENSG00000075218/ENSG00000076382/ENSG00000137807…
GO:1903046	BP	GO:1903046	meiotic cell cycle process	55	0.710016670147402	2.78014563471039	0.000133422281521014	0.0021264953618104	0.00145866135019434	310	tags=73%, list=19%, signal=61%	ENSG00000066279/ENSG00000131747/ENSG00000121621/ENSG00000112742/ENSG00000143228/ENSG00000121152/ENSG00000156970/ENSG00000129810/ENSG00000156509/ENSG00000135476/ENSG00000169679/ENSG00000117399/ENSG00000154920/ENSG00000136492/ENSG00000080986/ENSG00000185697/ENSG00000158402/ENSG00000163535/ENSG00000100206/ENSG00000085999/ENSG00000111247/ENSG00000187741/ENSG00000087586/ENSG00000144554/ENSG00000157456…
GO:0090068	BP	GO:0090068	positive regulation of cell cycle process	62	0.68988884372927	2.76222274528469	0.000130616509926855	0.0021264953618104	0.00145866135019434	348	tags=69%, list=22%, signal=57%	ENSG00000118193/ENSG00000170312/ENSG00000129173/ENSG00000171848/ENSG00000137804/ENSG00000178999/ENSG00000138182/ENSG00000126787/ENSG00000135476/ENSG00000076382/ENSG00000137807/ENSG00000080986/ENSG00000175063/ENSG00000101447/ENSG00000158402/ENSG00000111247/ENSG00000142731/ENSG00000087586/ENSG00000122966/ENSG00000143476/ENSG00000164109/ENSG00000154734/ENSG00000094804/ENSG00000146670/ENSG00000161800…
GO:0006259	BP	GO:0006259	DNA metabolic process	181	0.588727996123812	2.75675910195579	0.000112612612612613	0.0021264953618104	0.00145866135019434	422	tags=61%, list=26%, signal=51%	ENSG00000131747/ENSG00000117724/ENSG00000117650/ENSG00000065328/ENSG00000170312/ENSG00000171320/ENSG00000129173/ENSG00000171848/ENSG00000178999/ENSG00000109674/ENSG00000174371/ENSG00000154920/ENSG00000136492/ENSG00000051341/ENSG00000093009/ENSG00000100206/ENSG00000197299/ENSG00000189057/ENSG00000179750/ENSG00000085999/ENSG00000111247/ENSG00000187741/ENSG00000127586/ENSG00000092853/ENSG00000145386…
GO:0140013	BP	GO:0140013	meiotic nuclear division	50	0.716739184478711	2.75545790961803	0.000134952766531714	0.0021264953618104	0.00145866135019434	310	tags=74%, list=19%, signal=62%	ENSG00000066279/ENSG00000131747/ENSG00000121621/ENSG00000112742/ENSG00000143228/ENSG00000121152/ENSG00000156970/ENSG00000129810/ENSG00000156509/ENSG00000135476/ENSG00000169679/ENSG00000117399/ENSG00000154920/ENSG00000136492/ENSG00000080986/ENSG00000185697/ENSG00000163535/ENSG00000100206/ENSG00000085999/ENSG00000111247/ENSG00000187741/ENSG00000087586/ENSG00000144554/ENSG00000157456/ENSG00000166851…
GO:0010948	BP	GO:0010948	negative regulation of cell cycle process	72	0.667561643047513	2.75158089958079	0.000127844541038098	0.0021264953618104	0.00145866135019434	294	tags=61%, list=18%, signal=52%	ENSG00000117724/ENSG00000117650/ENSG00000112742/ENSG00000170312/ENSG00000129173/ENSG00000156970/ENSG00000156509/ENSG00000178999/ENSG00000135476/ENSG00000075218/ENSG00000169679/ENSG00000154920/ENSG00000136492/ENSG00000080986/ENSG00000093009/ENSG00000197299/ENSG00000092853/ENSG00000012048/ENSG00000144554/ENSG00000143476/ENSG00000166851/ENSG00000164109/ENSG00000094804/ENSG00000162063/ENSG00000122952…
GO:0000075	BP	GO:0000075	cell cycle checkpoint signaling	49	0.717454111554798	2.74732937107099	0.000135153399107988	0.0021264953618104	0.00145866135019434	294	tags=69%, list=18%, signal=59%	ENSG00000117724/ENSG00000112742/ENSG00000170312/ENSG00000156970/ENSG00000178999/ENSG00000075218/ENSG00000169679/ENSG00000154920/ENSG00000136492/ENSG00000080986/ENSG00000093009/ENSG00000197299/ENSG00000092853/ENSG00000012048/ENSG00000144554/ENSG00000143476/ENSG00000166851/ENSG00000164109/ENSG00000094804/ENSG00000122952/ENSG00000184445/ENSG00000071539/ENSG00000085840/ENSG00000101412/ENSG00000111602…
GO:0072686	CC	GO:0072686	mitotic spindle	49	0.715972244605268	2.74165489443354	0.000135153399107988	0.0021264953618104	0.00145866135019434	180	tags=55%, list=11%, signal=50%	ENSG00000066279/ENSG00000138778/ENSG00000186185/ENSG00000121621/ENSG00000169607/ENSG00000170312/ENSG00000154839/ENSG00000237649/ENSG00000137804/ENSG00000178999/ENSG00000138182/ENSG00000138160/ENSG00000135476/ENSG00000076382/ENSG00000137807/ENSG00000101447/ENSG00000088325/ENSG00000165480/ENSG00000198901/ENSG00000075702/ENSG00000013810/ENSG00000087586/ENSG00000166851/ENSG00000164109/ENSG00000079616…
GO:0051983	BP	GO:0051983	regulation of chromosome segregation	36	0.76023443898908	2.73090332126772	0.000141302811925957	0.0021264953618104	0.00145866135019434	288	tags=75%, list=18%, signal=63%	ENSG00000148773/ENSG00000138778/ENSG00000117724/ENSG00000112742/ENSG00000156970/ENSG00000178999/ENSG00000126787/ENSG00000142945/ENSG00000135476/ENSG00000169679/ENSG00000080986/ENSG00000175063/ENSG00000184661/ENSG00000013810/ENSG00000166851/ENSG00000164109/ENSG00000094804/ENSG00000122952/ENSG00000184445/ENSG00000071539/ENSG00000164611/ENSG00000134057/ENSG00000167513/ENSG00000112029/ENSG00000178295…
GO:0045787	BP	GO:0045787	positive regulation of cell cycle	70	0.6657448252172	2.73069713295916	0.000128106584678452	0.0021264953618104	0.00145866135019434	348	tags=67%, list=22%, signal=55%	ENSG00000118193/ENSG00000170312/ENSG00000129173/ENSG00000171848/ENSG00000137804/ENSG00000178999/ENSG00000138182/ENSG00000126787/ENSG00000135476/ENSG00000076382/ENSG00000137807/ENSG00000080986/ENSG00000175063/ENSG00000101447/ENSG00000158402/ENSG00000111247/ENSG00000142731/ENSG00000087586/ENSG00000122966/ENSG00000143476/ENSG00000164109/ENSG00000154734/ENSG00000094804/ENSG00000139618/ENSG00000146670…
GO:0099513	CC	GO:0099513	polymeric cytoskeletal fiber	88	0.64059590743805	2.72675334534102	0.000123915737298637	0.0021264953618104	0.00145866135019434	222	tags=47%, list=14%, signal=42%	ENSG00000066279/ENSG00000138778/ENSG00000186185/ENSG00000117650/ENSG00000121621/ENSG00000186847/ENSG00000118193/ENSG00000170312/ENSG00000154839/ENSG00000237649/ENSG00000163808/ENSG00000137804/ENSG00000178999/ENSG00000138182/ENSG00000138160/ENSG00000142945/ENSG00000090889/ENSG00000075218/ENSG00000076382/ENSG00000137807/ENSG00000113368/ENSG00000186832/ENSG00000088325/ENSG00000165480/ENSG00000171346…
GO:0051304	BP	GO:0051304	chromosome separation	36	0.757194775580034	2.71998428567347	0.000141302811925957	0.0021264953618104	0.00145866135019434	308	tags=78%, list=19%, signal=64%	ENSG00000138778/ENSG00000131747/ENSG00000117724/ENSG00000112742/ENSG00000121152/ENSG00000156970/ENSG00000178999/ENSG00000126787/ENSG00000135476/ENSG00000169679/ENSG00000154920/ENSG00000080986/ENSG00000175063/ENSG00000013810/ENSG00000166851/ENSG00000164109/ENSG00000094804/ENSG00000122952/ENSG00000184445/ENSG00000071539/ENSG00000164611/ENSG00000134057/ENSG00000167513/ENSG00000112029/ENSG00000178295…
GO:0099080	CC	GO:0099080	supramolecular complex	168	0.585226625521656	2.71923177081828	0.000113481615978212	0.0021264953618104	0.00145866135019434	293	tags=45%, list=18%, signal=41%	ENSG00000066279/ENSG00000186871/ENSG00000138778/ENSG00000186185/ENSG00000117724/ENSG00000117650/ENSG00000121621/ENSG00000186847/ENSG00000112742/ENSG00000137812/ENSG00000143228/ENSG00000118193/ENSG00000170312/ENSG00000154839/ENSG00000123485/ENSG00000237649/ENSG00000163808/ENSG00000137804/ENSG00000156970/ENSG00000129810/ENSG00000178999/ENSG00000138182/ENSG00000138160/ENSG00000152253/ENSG00000142945…
GO:0000910	BP	GO:0000910	cytokinesis	36	0.753016040833512	2.7049734942482	0.000141302811925957	0.0021264953618104	0.00145866135019434	222	tags=64%, list=14%, signal=56%	ENSG00000118193/ENSG00000129173/ENSG00000137804/ENSG00000178999/ENSG00000138182/ENSG00000011426/ENSG00000090889/ENSG00000135476/ENSG00000137807/ENSG00000138180/ENSG00000115163/ENSG00000198901/ENSG00000142731/ENSG00000112984/ENSG00000087586/ENSG00000122966/ENSG00000166851/ENSG00000094804/ENSG00000136108/ENSG00000139618/ENSG00000161800/ENSG00000114346/ENSG00000149503
GO:1905818	BP	GO:1905818	regulation of chromosome separation	29	0.79034599128281	2.70043978124493	0.000145900204260286	0.0021264953618104	0.00145866135019434	288	tags=83%, list=18%, signal=69%	ENSG00000138778/ENSG00000117724/ENSG00000112742/ENSG00000156970/ENSG00000178999/ENSG00000126787/ENSG00000135476/ENSG00000169679/ENSG00000080986/ENSG00000175063/ENSG00000013810/ENSG00000166851/ENSG00000164109/ENSG00000094804/ENSG00000122952/ENSG00000184445/ENSG00000071539/ENSG00000164611/ENSG00000134057/ENSG00000167513/ENSG00000112029/ENSG00000178295/ENSG00000174442/ENSG00000040275
GO:0010965	BP	GO:0010965	regulation of mitotic sister chromatid separation	28	0.796070236618257	2.70026995979013	0.00014626298083955	0.0021264953618104	0.00145866135019434	288	tags=86%, list=18%, signal=72%	ENSG00000138778/ENSG00000117724/ENSG00000112742/ENSG00000156970/ENSG00000178999/ENSG00000126787/ENSG00000135476/ENSG00000169679/ENSG00000080986/ENSG00000175063/ENSG00000013810/ENSG00000166851/ENSG00000164109/ENSG00000094804/ENSG00000122952/ENSG00000184445/ENSG00000071539/ENSG00000164611/ENSG00000134057/ENSG00000167513/ENSG00000112029/ENSG00000178295/ENSG00000174442/ENSG00000040275
GO:0051306	BP	GO:0051306	mitotic sister chromatid separation	28	0.796070236618257	2.70026995979013	0.00014626298083955	0.0021264953618104	0.00145866135019434	288	tags=86%, list=18%, signal=72%	ENSG00000138778/ENSG00000117724/ENSG00000112742/ENSG00000156970/ENSG00000178999/ENSG00000126787/ENSG00000135476/ENSG00000169679/ENSG00000080986/ENSG00000175063/ENSG00000013810/ENSG00000166851/ENSG00000164109/ENSG00000094804/ENSG00000122952/ENSG00000184445/ENSG00000071539/ENSG00000164611/ENSG00000134057/ENSG00000167513/ENSG00000112029/ENSG00000178295/ENSG00000174442/ENSG00000040275
GO:0006260	BP	GO:0006260	DNA replication	87	0.630993440264196	2.68340828024981	0.000124007936507937	0.0021264953618104	0.00145866135019434	429	tags=71%, list=27%, signal=55%	ENSG00000065328/ENSG00000170312/ENSG00000171320/ENSG00000129173/ENSG00000171848/ENSG00000154920/ENSG00000051341/ENSG00000093009/ENSG00000197299/ENSG00000189057/ENSG00000127586/ENSG00000145386/ENSG00000143476/ENSG00000147536/ENSG00000138658/ENSG00000198056/ENSG00000160957/ENSG00000094804/ENSG00000139618/ENSG00000100297/ENSG00000161692/ENSG00000085840/ENSG00000133119/ENSG00000104889/ENSG00000176208…
GO:0033045	BP	GO:0033045	regulation of sister chromatid segregation	29	0.783378411838569	2.67663308276384	0.000145900204260286	0.0021264953618104	0.00145866135019434	288	tags=83%, list=18%, signal=69%	ENSG00000138778/ENSG00000117724/ENSG00000112742/ENSG00000156970/ENSG00000178999/ENSG00000126787/ENSG00000135476/ENSG00000169679/ENSG00000080986/ENSG00000175063/ENSG00000013810/ENSG00000166851/ENSG00000164109/ENSG00000094804/ENSG00000122952/ENSG00000184445/ENSG00000071539/ENSG00000164611/ENSG00000134057/ENSG00000167513/ENSG00000112029/ENSG00000178295/ENSG00000174442/ENSG00000040275
GO:0007091	BP	GO:0007091	metaphase/anaphase transition of mitotic cell cycle	27	0.794360608239802	2.67346540260626	0.000147037200411704	0.0021264953618104	0.00145866135019434	288	tags=85%, list=18%, signal=71%	ENSG00000138778/ENSG00000117724/ENSG00000112742/ENSG00000156970/ENSG00000178999/ENSG00000126787/ENSG00000135476/ENSG00000169679/ENSG00000080986/ENSG00000175063/ENSG00000013810/ENSG00000166851/ENSG00000164109/ENSG00000094804/ENSG00000122952/ENSG00000184445/ENSG00000071539/ENSG00000134057/ENSG00000167513/ENSG00000112029/ENSG00000178295/ENSG00000174442/ENSG00000040275
GO:0044784	BP	GO:0044784	metaphase/anaphase transition of cell cycle	27	0.794360608239802	2.67346540260626	0.000147037200411704	0.0021264953618104	0.00145866135019434	288	tags=85%, list=18%, signal=71%	ENSG00000138778/ENSG00000117724/ENSG00000112742/ENSG00000156970/ENSG00000178999/ENSG00000126787/ENSG00000135476/ENSG00000169679/ENSG00000080986/ENSG00000175063/ENSG00000013810/ENSG00000166851/ENSG00000164109/ENSG00000094804/ENSG00000122952/ENSG00000184445/ENSG00000071539/ENSG00000134057/ENSG00000167513/ENSG00000112029/ENSG00000178295/ENSG00000174442/ENSG00000040275
GO:0007052	BP	GO:0007052	mitotic spindle organization	40	0.727969550905696	2.67341951326924	0.000139489468545125	0.0021264953618104	0.00145866135019434	263	tags=65%, list=16%, signal=56%	ENSG00000138778/ENSG00000117650/ENSG00000112742/ENSG00000143228/ENSG00000237649/ENSG00000163808/ENSG00000178999/ENSG00000138160/ENSG00000126787/ENSG00000152253/ENSG00000090889/ENSG00000137807/ENSG00000117399/ENSG00000080986/ENSG00000088325/ENSG00000198901/ENSG00000101057/ENSG00000075702/ENSG00000013810/ENSG00000087586/ENSG00000166851/ENSG00000161800/ENSG00000123473/ENSG00000134057/ENSG00000134222…
GO:0000922	CC	GO:0000922	spindle pole	49	0.698012538874521	2.67288223531121	0.000135153399107988	0.0021264953618104	0.00145866135019434	301	tags=63%, list=19%, signal=53%	ENSG00000066279/ENSG00000117724/ENSG00000117650/ENSG00000169607/ENSG00000129810/ENSG00000178999/ENSG00000138182/ENSG00000138160/ENSG00000126787/ENSG00000076382/ENSG00000117399/ENSG00000101447/ENSG00000088325/ENSG00000198901/ENSG00000142731/ENSG00000075702/ENSG00000013810/ENSG00000087586/ENSG00000127423/ENSG00000166851/ENSG00000164109/ENSG00000094804/ENSG00000136108/ENSG00000184445/ENSG00000100629…
GO:0005874	CC	GO:0005874	microtubule	68	0.65365017770358	2.6643417065962	0.000128882587962366	0.0021264953618104	0.00145866135019434	241	tags=50%, list=15%, signal=44%	ENSG00000066279/ENSG00000138778/ENSG00000186185/ENSG00000117650/ENSG00000121621/ENSG00000118193/ENSG00000170312/ENSG00000154839/ENSG00000237649/ENSG00000163808/ENSG00000137804/ENSG00000178999/ENSG00000138182/ENSG00000138160/ENSG00000142945/ENSG00000090889/ENSG00000075218/ENSG00000076382/ENSG00000137807/ENSG00000088325/ENSG00000165480/ENSG00000198901/ENSG00000089685/ENSG00000112984/ENSG00000087586…
GO:0007051	BP	GO:0007051	spindle organization	57	0.673126857628566	2.65436986491595	0.000132257637878587	0.0021264953618104	0.00145866135019434	293	tags=61%, list=18%, signal=52%	ENSG00000066279/ENSG00000138778/ENSG00000117650/ENSG00000112742/ENSG00000143228/ENSG00000237649/ENSG00000163808/ENSG00000178999/ENSG00000138160/ENSG00000126787/ENSG00000152253/ENSG00000090889/ENSG00000135476/ENSG00000076382/ENSG00000137807/ENSG00000117399/ENSG00000080986/ENSG00000088325/ENSG00000198901/ENSG00000101057/ENSG00000075702/ENSG00000013810/ENSG00000087586/ENSG00000127423/ENSG00000157456…
GO:0030071	BP	GO:0030071	regulation of mitotic metaphase/anaphase transition	26	0.792117505175333	2.64638344298118	0.000146993973247097	0.0021264953618104	0.00145866135019434	288	tags=85%, list=18%, signal=71%	ENSG00000138778/ENSG00000117724/ENSG00000112742/ENSG00000156970/ENSG00000178999/ENSG00000126787/ENSG00000135476/ENSG00000169679/ENSG00000080986/ENSG00000175063/ENSG00000166851/ENSG00000164109/ENSG00000094804/ENSG00000122952/ENSG00000184445/ENSG00000071539/ENSG00000134057/ENSG00000167513/ENSG00000112029/ENSG00000178295/ENSG00000174442/ENSG00000040275
GO:1902099	BP	GO:1902099	regulation of metaphase/anaphase transition of cell cycle	26	0.792117505175333	2.64638344298118	0.000146993973247097	0.0021264953618104	0.00145866135019434	288	tags=85%, list=18%, signal=71%	ENSG00000138778/ENSG00000117724/ENSG00000112742/ENSG00000156970/ENSG00000178999/ENSG00000126787/ENSG00000135476/ENSG00000169679/ENSG00000080986/ENSG00000175063/ENSG00000166851/ENSG00000164109/ENSG00000094804/ENSG00000122952/ENSG00000184445/ENSG00000071539/ENSG00000134057/ENSG00000167513/ENSG00000112029/ENSG00000178295/ENSG00000174442/ENSG00000040275
GO:0045786	BP	GO:0045786	negative regulation of cell cycle	81	0.629680234583737	2.6451854968293	0.000125234815278647	0.0021264953618104	0.00145866135019434	294	tags=57%, list=18%, signal=49%	ENSG00000117724/ENSG00000117650/ENSG00000112742/ENSG00000170312/ENSG00000129173/ENSG00000156970/ENSG00000156509/ENSG00000178999/ENSG00000135476/ENSG00000075218/ENSG00000169679/ENSG00000154920/ENSG00000136492/ENSG00000080986/ENSG00000093009/ENSG00000197299/ENSG00000092853/ENSG00000012048/ENSG00000144554/ENSG00000143476/ENSG00000166851/ENSG00000164109/ENSG00000094804/ENSG00000162063/ENSG00000122952…
GO:0008017	MF	GO:0008017	microtubule binding	52	0.682298292871633	2.63972441656686	0.000134174158057158	0.0021264953618104	0.00145866135019434	180	tags=54%, list=11%, signal=49%	ENSG00000138778/ENSG00000186185/ENSG00000117724/ENSG00000121621/ENSG00000118193/ENSG00000154839/ENSG00000237649/ENSG00000163808/ENSG00000137804/ENSG00000138182/ENSG00000138160/ENSG00000126787/ENSG00000142945/ENSG00000090889/ENSG00000075218/ENSG00000076382/ENSG00000137807/ENSG00000101447/ENSG00000088325/ENSG00000198901/ENSG00000089685/ENSG00000112984/ENSG00000139734/ENSG00000166851/ENSG00000079616…
GO:1901988	BP	GO:1901988	negative regulation of cell cycle phase transition	59	0.66539410633192	2.63829693950645	0.000131995776135164	0.0021264953618104	0.00145866135019434	294	tags=63%, list=18%, signal=53%	ENSG00000117724/ENSG00000112742/ENSG00000170312/ENSG00000156970/ENSG00000178999/ENSG00000075218/ENSG00000169679/ENSG00000154920/ENSG00000136492/ENSG00000080986/ENSG00000093009/ENSG00000197299/ENSG00000092853/ENSG00000012048/ENSG00000144554/ENSG00000143476/ENSG00000166851/ENSG00000164109/ENSG00000094804/ENSG00000122952/ENSG00000184445/ENSG00000071539/ENSG00000085840/ENSG00000101412/ENSG00000111602…
GO:0003777	MF	GO:0003777	microtubule motor activity	17	0.874142053657466	2.63544524898744	0.00015605493133583	0.0021264953618104	0.00145866135019434	156	tags=82%, list=10%, signal=75%	ENSG00000138778/ENSG00000186185/ENSG00000121621/ENSG00000118193/ENSG00000237649/ENSG00000163808/ENSG00000138182/ENSG00000138160/ENSG00000142945/ENSG00000090889/ENSG00000137807/ENSG00000112984/ENSG00000079616/ENSG00000186638
GO:1901989	BP	GO:1901989	positive regulation of cell cycle phase transition	30	0.761247080377853	2.62321885849358	0.000145053669857847	0.0021264953618104	0.00145866135019434	302	tags=80%, list=19%, signal=66%	ENSG00000170312/ENSG00000171848/ENSG00000126787/ENSG00000135476/ENSG00000175063/ENSG00000101447/ENSG00000158402/ENSG00000143476/ENSG00000154734/ENSG00000094804/ENSG00000146670/ENSG00000161692/ENSG00000176208/ENSG00000156876/ENSG00000123473/ENSG00000106462/ENSG00000134057/ENSG00000167513/ENSG00000112029/ENSG00000172167/ENSG00000164045/ENSG00000151849/ENSG00000097046/ENSG00000167325
GO:0006261	BP	GO:0006261	DNA-templated DNA replication	62	0.653188392743605	2.61527904356194	0.000130616509926855	0.0021264953618104	0.00145866135019434	429	tags=77%, list=27%, signal=59%	ENSG00000065328/ENSG00000129173/ENSG00000154920/ENSG00000051341/ENSG00000093009/ENSG00000197299/ENSG00000127586/ENSG00000147536/ENSG00000138658/ENSG00000198056/ENSG00000160957/ENSG00000094804/ENSG00000139618/ENSG00000100297/ENSG00000161692/ENSG00000085840/ENSG00000133119/ENSG00000176208/ENSG00000111602/ENSG00000175305/ENSG00000167513/ENSG00000131153/ENSG00000091651/ENSG00000112029/ENSG00000138346…
GO:0015630	CC	GO:0015630	microtubule cytoskeleton	199	0.551525666711377	2.6121478080443	0.000110668437361664	0.0021264953618104	0.00145866135019434	431	tags=56%, list=27%, signal=47%	ENSG00000066279/ENSG00000138778/ENSG00000131747/ENSG00000186185/ENSG00000117724/ENSG00000117650/ENSG00000121621/ENSG00000112742/ENSG00000118193/ENSG00000169607/ENSG00000170312/ENSG00000154839/ENSG00000237649/ENSG00000163808/ENSG00000137804/ENSG00000156970/ENSG00000129810/ENSG00000178999/ENSG00000138182/ENSG00000072571/ENSG00000138160/ENSG00000126787/ENSG00000142945/ENSG00000090889/ENSG00000135476…
GO:0006281	BP	GO:0006281	DNA repair	115	0.58450291761202	2.59045152099984	0.000119118522930316	0.0021264953618104	0.00145866135019434	568	tags=79%, list=35%, signal=55%	ENSG00000170312/ENSG00000171320/ENSG00000109674/ENSG00000174371/ENSG00000154920/ENSG00000136492/ENSG00000051341/ENSG00000093009/ENSG00000100206/ENSG00000197299/ENSG00000085999/ENSG00000111247/ENSG00000187741/ENSG00000092853/ENSG00000012048/ENSG00000196584/ENSG00000144554/ENSG00000127423/ENSG00000276043/ENSG00000125885/ENSG00000143476/ENSG00000147536/ENSG00000079616/ENSG00000160957/ENSG00000139618…
GO:0007093	BP	GO:0007093	mitotic cell cycle checkpoint signaling	40	0.703906640293941	2.58505008257604	0.000139489468545125	0.0021264953618104	0.00145866135019434	320	tags=70%, list=20%, signal=58%	ENSG00000117724/ENSG00000112742/ENSG00000170312/ENSG00000156970/ENSG00000178999/ENSG00000075218/ENSG00000169679/ENSG00000154920/ENSG00000080986/ENSG00000197299/ENSG00000092853/ENSG00000012048/ENSG00000144554/ENSG00000143476/ENSG00000166851/ENSG00000164109/ENSG00000094804/ENSG00000122952/ENSG00000184445/ENSG00000071539/ENSG00000085840/ENSG00000134057/ENSG00000167513/ENSG00000178295/ENSG00000174442…
GO:0030496	CC	GO:0030496	midbody	42	0.691644989042444	2.56896060360124	0.000137931034482759	0.0021264953618104	0.00145866135019434	241	tags=60%, list=15%, signal=52%	ENSG00000066279/ENSG00000138778/ENSG00000117724/ENSG00000117650/ENSG00000118193/ENSG00000170312/ENSG00000178999/ENSG00000138182/ENSG00000011426/ENSG00000090889/ENSG00000076382/ENSG00000137807/ENSG00000138180/ENSG00000171241/ENSG00000198901/ENSG00000134690/ENSG00000089685/ENSG00000112984/ENSG00000087586/ENSG00000122966/ENSG00000166851/ENSG00000161800/ENSG00000114346/ENSG00000149503/ENSG00000134222
GO:0044839	BP	GO:0044839	cell cycle G2/M phase transition	42	0.691420269446354	2.56812593292719	0.000137931034482759	0.0021264953618104	0.00145866135019434	320	tags=69%, list=20%, signal=57%	ENSG00000117724/ENSG00000118193/ENSG00000170312/ENSG00000178999/ENSG00000080986/ENSG00000158402/ENSG00000197299/ENSG00000127564/ENSG00000092853/ENSG00000145386/ENSG00000012048/ENSG00000087586/ENSG00000157456/ENSG00000122966/ENSG00000143476/ENSG00000166851/ENSG00000094804/ENSG00000161692/ENSG00000085840/ENSG00000176208/ENSG00000165304/ENSG00000134057/ENSG00000112029/ENSG00000120539/ENSG00000164045…
GO:0033044	BP	GO:0033044	regulation of chromosome organization	55	0.655035575467739	2.56486132267652	0.000133422281521014	0.0021264953618104	0.00145866135019434	417	tags=69%, list=26%, signal=53%	ENSG00000138778/ENSG00000131747/ENSG00000117724/ENSG00000117650/ENSG00000112742/ENSG00000109805/ENSG00000121152/ENSG00000156970/ENSG00000178999/ENSG00000126787/ENSG00000135476/ENSG00000169679/ENSG00000080986/ENSG00000175063/ENSG00000013810/ENSG00000166851/ENSG00000164109/ENSG00000094804/ENSG00000146670/ENSG00000122952/ENSG00000184445/ENSG00000071539/ENSG00000164611/ENSG00000113810/ENSG00000134057…
GO:0003774	MF	GO:0003774	cytoskeletal motor activity	20	0.817247813262325	2.56198738517365	0.000152578577967653	0.0021264953618104	0.00145866135019434	156	tags=70%, list=10%, signal=64%	ENSG00000138778/ENSG00000186185/ENSG00000121621/ENSG00000118193/ENSG00000237649/ENSG00000163808/ENSG00000138182/ENSG00000138160/ENSG00000142945/ENSG00000090889/ENSG00000137807/ENSG00000112984/ENSG00000079616/ENSG00000186638
GO:0045931	BP	GO:0045931	positive regulation of mitotic cell cycle	28	0.752222255478911	2.55153762334329	0.00014626298083955	0.0021264953618104	0.00145866135019434	326	tags=82%, list=20%, signal=67%	ENSG00000170312/ENSG00000171848/ENSG00000126787/ENSG00000135476/ENSG00000175063/ENSG00000158402/ENSG00000143476/ENSG00000154734/ENSG00000094804/ENSG00000139618/ENSG00000146670/ENSG00000161692/ENSG00000156876/ENSG00000123473/ENSG00000134057/ENSG00000167513/ENSG00000112029/ENSG00000172167/ENSG00000164045/ENSG00000151849/ENSG00000097046/ENSG00000167325/ENSG00000112562
GO:1901992	BP	GO:1901992	positive regulation of mitotic cell cycle phase transition	26	0.762504409068557	2.54744912235279	0.000146993973247097	0.0021264953618104	0.00145866135019434	302	tags=81%, list=19%, signal=67%	ENSG00000170312/ENSG00000171848/ENSG00000126787/ENSG00000135476/ENSG00000175063/ENSG00000158402/ENSG00000143476/ENSG00000154734/ENSG00000094804/ENSG00000146670/ENSG00000161692/ENSG00000156876/ENSG00000123473/ENSG00000134057/ENSG00000167513/ENSG00000112029/ENSG00000172167/ENSG00000164045/ENSG00000151849/ENSG00000097046/ENSG00000167325
GO:0007010	BP	GO:0007010	cytoskeleton organization	180	0.543228990610299	2.54203805264695	0.000112688753662384	0.0021264953618104	0.00145866135019434	301	tags=43%, list=19%, signal=40%	ENSG00000066279/ENSG00000138778/ENSG00000183856/ENSG00000186185/ENSG00000117650/ENSG00000121621/ENSG00000186847/ENSG00000112742/ENSG00000143228/ENSG00000170312/ENSG00000154839/ENSG00000237649/ENSG00000163808/ENSG00000137804/ENSG00000129810/ENSG00000178999/ENSG00000011426/ENSG00000138160/ENSG00000178882/ENSG00000126787/ENSG00000152253/ENSG00000142945/ENSG00000090889/ENSG00000135476/ENSG00000076382…
GO:0051784	BP	GO:0051784	negative regulation of nuclear division	22	0.792272335548135	2.54157110443862	0.000150852315583044	0.0021264953618104	0.00145866135019434	288	tags=86%, list=18%, signal=72%	ENSG00000117724/ENSG00000112742/ENSG00000156970/ENSG00000156509/ENSG00000178999/ENSG00000169679/ENSG00000080986/ENSG00000166851/ENSG00000164109/ENSG00000122952/ENSG00000184445/ENSG00000071539/ENSG00000134057/ENSG00000167513/ENSG00000112029/ENSG00000178295/ENSG00000174442/ENSG00000172167/ENSG00000040275
GO:0050000	BP	GO:0050000	chromosome localization	29	0.736303274362978	2.51578761084548	0.000145900204260286	0.0021264953618104	0.00145866135019434	241	tags=66%, list=15%, signal=57%	ENSG00000138778/ENSG00000117724/ENSG00000121621/ENSG00000143228/ENSG00000118193/ENSG00000237649/ENSG00000178999/ENSG00000126787/ENSG00000142945/ENSG00000076382/ENSG00000080986/ENSG00000101447/ENSG00000134690/ENSG00000079616/ENSG00000146670/ENSG00000149503/ENSG00000134057/ENSG00000167513/ENSG00000134222
GO:0051303	BP	GO:0051303	establishment of chromosome localization	29	0.736303274362978	2.51578761084548	0.000145900204260286	0.0021264953618104	0.00145866135019434	241	tags=66%, list=15%, signal=57%	ENSG00000138778/ENSG00000117724/ENSG00000121621/ENSG00000143228/ENSG00000118193/ENSG00000237649/ENSG00000178999/ENSG00000126787/ENSG00000142945/ENSG00000076382/ENSG00000080986/ENSG00000101447/ENSG00000134690/ENSG00000079616/ENSG00000146670/ENSG00000149503/ENSG00000134057/ENSG00000167513/ENSG00000134222
GO:0032465	BP	GO:0032465	regulation of cytokinesis	22	0.779677764274022	2.50116833257996	0.000150852315583044	0.0021264953618104	0.00145866135019434	213	tags=68%, list=13%, signal=60%	ENSG00000118193/ENSG00000129173/ENSG00000178999/ENSG00000138182/ENSG00000137807/ENSG00000198901/ENSG00000142731/ENSG00000112984/ENSG00000087586/ENSG00000122966/ENSG00000166851/ENSG00000094804/ENSG00000139618/ENSG00000161800/ENSG00000114346
GO:0006310	BP	GO:0006310	DNA recombination	70	0.609769507086643	2.50110219666247	0.000128106584678452	0.0021264953618104	0.00145866135019434	401	tags=64%, list=25%, signal=51%	ENSG00000131747/ENSG00000174371/ENSG00000154920/ENSG00000136492/ENSG00000051341/ENSG00000093009/ENSG00000100206/ENSG00000197299/ENSG00000085999/ENSG00000111247/ENSG00000012048/ENSG00000196584/ENSG00000144554/ENSG00000127423/ENSG00000125885/ENSG00000147536/ENSG00000160957/ENSG00000121211/ENSG00000139618/ENSG00000071539/ENSG00000100297/ENSG00000176208/ENSG00000111602/ENSG00000181544/ENSG00000131153…
GO:0033046	BP	GO:0033046	negative regulation of sister chromatid segregation	21	0.789167290596585	2.50049126140892	0.000151699029126214	0.0021264953618104	0.00145866135019434	288	tags=86%, list=18%, signal=71%	ENSG00000117724/ENSG00000112742/ENSG00000156970/ENSG00000178999/ENSG00000169679/ENSG00000080986/ENSG00000166851/ENSG00000164109/ENSG00000122952/ENSG00000184445/ENSG00000071539/ENSG00000164611/ENSG00000134057/ENSG00000167513/ENSG00000112029/ENSG00000178295/ENSG00000174442/ENSG00000040275
GO:0033047	BP	GO:0033047	regulation of mitotic sister chromatid segregation	21	0.789167290596585	2.50049126140892	0.000151699029126214	0.0021264953618104	0.00145866135019434	288	tags=86%, list=18%, signal=71%	ENSG00000117724/ENSG00000112742/ENSG00000156970/ENSG00000178999/ENSG00000169679/ENSG00000080986/ENSG00000166851/ENSG00000164109/ENSG00000122952/ENSG00000184445/ENSG00000071539/ENSG00000164611/ENSG00000134057/ENSG00000167513/ENSG00000112029/ENSG00000178295/ENSG00000174442/ENSG00000040275
GO:0033048	BP	GO:0033048	negative regulation of mitotic sister chromatid segregation	21	0.789167290596585	2.50049126140892	0.000151699029126214	0.0021264953618104	0.00145866135019434	288	tags=86%, list=18%, signal=71%	ENSG00000117724/ENSG00000112742/ENSG00000156970/ENSG00000178999/ENSG00000169679/ENSG00000080986/ENSG00000166851/ENSG00000164109/ENSG00000122952/ENSG00000184445/ENSG00000071539/ENSG00000164611/ENSG00000134057/ENSG00000167513/ENSG00000112029/ENSG00000178295/ENSG00000174442/ENSG00000040275
GO:0051985	BP	GO:0051985	negative regulation of chromosome segregation	21	0.789167290596585	2.50049126140892	0.000151699029126214	0.0021264953618104	0.00145866135019434	288	tags=86%, list=18%, signal=71%	ENSG00000117724/ENSG00000112742/ENSG00000156970/ENSG00000178999/ENSG00000169679/ENSG00000080986/ENSG00000166851/ENSG00000164109/ENSG00000122952/ENSG00000184445/ENSG00000071539/ENSG00000164611/ENSG00000134057/ENSG00000167513/ENSG00000112029/ENSG00000178295/ENSG00000174442/ENSG00000040275
GO:1905819	BP	GO:1905819	negative regulation of chromosome separation	21	0.789167290596585	2.50049126140892	0.000151699029126214	0.0021264953618104	0.00145866135019434	288	tags=86%, list=18%, signal=71%	ENSG00000117724/ENSG00000112742/ENSG00000156970/ENSG00000178999/ENSG00000169679/ENSG00000080986/ENSG00000166851/ENSG00000164109/ENSG00000122952/ENSG00000184445/ENSG00000071539/ENSG00000164611/ENSG00000134057/ENSG00000167513/ENSG00000112029/ENSG00000178295/ENSG00000174442/ENSG00000040275
GO:2000816	BP	GO:2000816	negative regulation of mitotic sister chromatid separation	21	0.789167290596585	2.50049126140892	0.000151699029126214	0.0021264953618104	0.00145866135019434	288	tags=86%, list=18%, signal=71%	ENSG00000117724/ENSG00000112742/ENSG00000156970/ENSG00000178999/ENSG00000169679/ENSG00000080986/ENSG00000166851/ENSG00000164109/ENSG00000122952/ENSG00000184445/ENSG00000071539/ENSG00000164611/ENSG00000134057/ENSG00000167513/ENSG00000112029/ENSG00000178295/ENSG00000174442/ENSG00000040275
GO:0061640	BP	GO:0061640	cytoskeleton-dependent cytokinesis	23	0.770279878890541	2.50013496260192	0.000149454491107458	0.0021264953618104	0.00145866135019434	222	tags=70%, list=14%, signal=61%	ENSG00000137804/ENSG00000178999/ENSG00000138182/ENSG00000011426/ENSG00000090889/ENSG00000135476/ENSG00000137807/ENSG00000138180/ENSG00000115163/ENSG00000112984/ENSG00000122966/ENSG00000166851/ENSG00000136108/ENSG00000161800/ENSG00000114346/ENSG00000149503
GO:0045839	BP	GO:0045839	negative regulation of mitotic nuclear division	21	0.788714470082848	2.49905649117569	0.000151699029126214	0.0021264953618104	0.00145866135019434	288	tags=86%, list=18%, signal=71%	ENSG00000117724/ENSG00000112742/ENSG00000156970/ENSG00000178999/ENSG00000169679/ENSG00000080986/ENSG00000166851/ENSG00000164109/ENSG00000122952/ENSG00000184445/ENSG00000071539/ENSG00000134057/ENSG00000167513/ENSG00000112029/ENSG00000178295/ENSG00000174442/ENSG00000172167/ENSG00000040275
GO:0061982	BP	GO:0061982	meiosis I cell cycle process	36	0.694002461879105	2.49298575664874	0.000141302811925957	0.0021264953618104	0.00145866135019434	310	tags=72%, list=19%, signal=60%	ENSG00000131747/ENSG00000129810/ENSG00000135476/ENSG00000154920/ENSG00000136492/ENSG00000080986/ENSG00000185697/ENSG00000158402/ENSG00000163535/ENSG00000100206/ENSG00000085999/ENSG00000111247/ENSG00000087586/ENSG00000144554/ENSG00000157456/ENSG00000166851/ENSG00000121211/ENSG00000139618/ENSG00000071539/ENSG00000164611/ENSG00000175305/ENSG00000112029/ENSG00000164045/ENSG00000131470/ENSG00000187790…
GO:0015631	MF	GO:0015631	tubulin binding	67	0.613349341598059	2.49157057418351	0.00012911555842479	0.0021264953618104	0.00145866135019434	180	tags=45%, list=11%, signal=42%	ENSG00000138778/ENSG00000186185/ENSG00000117724/ENSG00000121621/ENSG00000118193/ENSG00000154839/ENSG00000237649/ENSG00000163808/ENSG00000137804/ENSG00000138182/ENSG00000138160/ENSG00000126787/ENSG00000142945/ENSG00000090889/ENSG00000075218/ENSG00000076382/ENSG00000137807/ENSG00000101447/ENSG00000088325/ENSG00000198901/ENSG00000089685/ENSG00000112984/ENSG00000012048/ENSG00000139734/ENSG00000166851…
GO:0000086	BP	GO:0000086	G2/M transition of mitotic cell cycle	38	0.684416373407527	2.4908204712178	0.00013986013986014	0.0021264953618104	0.00145866135019434	320	tags=68%, list=20%, signal=56%	ENSG00000117724/ENSG00000118193/ENSG00000170312/ENSG00000178999/ENSG00000158402/ENSG00000197299/ENSG00000127564/ENSG00000092853/ENSG00000145386/ENSG00000012048/ENSG00000087586/ENSG00000122966/ENSG00000143476/ENSG00000166851/ENSG00000094804/ENSG00000161692/ENSG00000085840/ENSG00000165304/ENSG00000134057/ENSG00000112029/ENSG00000120539/ENSG00000164045/ENSG00000123374/ENSG00000097046/ENSG00000167325…
GO:0051310	BP	GO:0051310	metaphase plate congression	27	0.737893940854958	2.48342365067653	0.000147037200411704	0.0021264953618104	0.00145866135019434	241	tags=67%, list=15%, signal=58%	ENSG00000138778/ENSG00000117724/ENSG00000121621/ENSG00000143228/ENSG00000118193/ENSG00000237649/ENSG00000178999/ENSG00000142945/ENSG00000076382/ENSG00000080986/ENSG00000101447/ENSG00000134690/ENSG00000079616/ENSG00000146670/ENSG00000149503/ENSG00000134057/ENSG00000167513/ENSG00000134222
GO:0099081	CC	GO:0099081	supramolecular polymer	103	0.57048615568396	2.48341156561807	0.000121684108055488	0.0021264953618104	0.00145866135019434	222	tags=40%, list=14%, signal=37%	ENSG00000066279/ENSG00000138778/ENSG00000186185/ENSG00000117650/ENSG00000121621/ENSG00000186847/ENSG00000118193/ENSG00000170312/ENSG00000154839/ENSG00000237649/ENSG00000163808/ENSG00000137804/ENSG00000178999/ENSG00000138182/ENSG00000138160/ENSG00000142945/ENSG00000090889/ENSG00000075218/ENSG00000076382/ENSG00000137807/ENSG00000113368/ENSG00000186832/ENSG00000088325/ENSG00000165480/ENSG00000171346…
GO:0099512	CC	GO:0099512	supramolecular fiber	103	0.57048615568396	2.48341156561807	0.000121684108055488	0.0021264953618104	0.00145866135019434	222	tags=40%, list=14%, signal=37%	ENSG00000066279/ENSG00000138778/ENSG00000186185/ENSG00000117650/ENSG00000121621/ENSG00000186847/ENSG00000118193/ENSG00000170312/ENSG00000154839/ENSG00000237649/ENSG00000163808/ENSG00000137804/ENSG00000178999/ENSG00000138182/ENSG00000138160/ENSG00000142945/ENSG00000090889/ENSG00000075218/ENSG00000076382/ENSG00000137807/ENSG00000113368/ENSG00000186832/ENSG00000088325/ENSG00000165480/ENSG00000171346…
GO:0045841	BP	GO:0045841	negative regulation of mitotic metaphase/anaphase transition	20	0.786761223852135	2.46641507990913	0.000152578577967653	0.0021264953618104	0.00145866135019434	288	tags=85%, list=18%, signal=71%	ENSG00000117724/ENSG00000112742/ENSG00000156970/ENSG00000178999/ENSG00000169679/ENSG00000080986/ENSG00000166851/ENSG00000164109/ENSG00000122952/ENSG00000184445/ENSG00000071539/ENSG00000134057/ENSG00000167513/ENSG00000112029/ENSG00000178295/ENSG00000174442/ENSG00000040275
GO:1902100	BP	GO:1902100	negative regulation of metaphase/anaphase transition of cell cycle	20	0.786761223852135	2.46641507990913	0.000152578577967653	0.0021264953618104	0.00145866135019434	288	tags=85%, list=18%, signal=71%	ENSG00000117724/ENSG00000112742/ENSG00000156970/ENSG00000178999/ENSG00000169679/ENSG00000080986/ENSG00000166851/ENSG00000164109/ENSG00000122952/ENSG00000184445/ENSG00000071539/ENSG00000134057/ENSG00000167513/ENSG00000112029/ENSG00000178295/ENSG00000174442/ENSG00000040275
GO:0005875	CC	GO:0005875	microtubule associated complex	25	0.742081588851783	2.45961940075729	0.000147579693034238	0.0021264953618104	0.00145866135019434	154	tags=60%, list=10%, signal=55%	ENSG00000186185/ENSG00000121621/ENSG00000118193/ENSG00000237649/ENSG00000163808/ENSG00000178999/ENSG00000138182/ENSG00000138160/ENSG00000142945/ENSG00000137807/ENSG00000134690/ENSG00000089685/ENSG00000112984/ENSG00000087586/ENSG00000079616
GO:0000281	BP	GO:0000281	mitotic cytokinesis	21	0.774187174264835	2.45302648375181	0.000151699029126214	0.0021264953618104	0.00145866135019434	222	tags=71%, list=14%, signal=62%	ENSG00000137804/ENSG00000138182/ENSG00000011426/ENSG00000090889/ENSG00000135476/ENSG00000137807/ENSG00000138180/ENSG00000115163/ENSG00000112984/ENSG00000122966/ENSG00000166851/ENSG00000136108/ENSG00000161800/ENSG00000114346/ENSG00000149503
GO:0090307	BP	GO:0090307	mitotic spindle assembly	20	0.782365275760388	2.4526342372147	0.000152578577967653	0.0021264953618104	0.00145866135019434	180	tags=65%, list=11%, signal=58%	ENSG00000117650/ENSG00000237649/ENSG00000163808/ENSG00000178999/ENSG00000138160/ENSG00000090889/ENSG00000137807/ENSG00000117399/ENSG00000088325/ENSG00000198901/ENSG00000101057/ENSG00000166851/ENSG00000161800
GO:2001251	BP	GO:2001251	negative regulation of chromosome organization	28	0.721580705934583	2.44760149817492	0.00014626298083955	0.0021264953618104	0.00145866135019434	288	tags=71%, list=18%, signal=60%	ENSG00000131747/ENSG00000117724/ENSG00000112742/ENSG00000156970/ENSG00000178999/ENSG00000135476/ENSG00000169679/ENSG00000080986/ENSG00000166851/ENSG00000164109/ENSG00000122952/ENSG00000184445/ENSG00000071539/ENSG00000164611/ENSG00000134057/ENSG00000167513/ENSG00000112029/ENSG00000178295/ENSG00000174442/ENSG00000040275
GO:0008608	BP	GO:0008608	attachment of spindle microtubules to kinetochore	21	0.772063000822934	2.44629600063057	0.000151699029126214	0.0021264953618104	0.00145866135019434	237	tags=71%, list=15%, signal=62%	ENSG00000138778/ENSG00000117650/ENSG00000137812/ENSG00000143228/ENSG00000129810/ENSG00000178999/ENSG00000152253/ENSG00000142945/ENSG00000076382/ENSG00000080986/ENSG00000161888/ENSG00000161800/ENSG00000114346/ENSG00000134057/ENSG00000167513
GO:0007094	BP	GO:0007094	mitotic spindle assembly checkpoint signaling	18	0.79810187518996	2.43989901231811	0.000154631204577084	0.0021264953618104	0.00145866135019434	288	tags=89%, list=18%, signal=74%	ENSG00000117724/ENSG00000112742/ENSG00000156970/ENSG00000178999/ENSG00000169679/ENSG00000080986/ENSG00000166851/ENSG00000164109/ENSG00000122952/ENSG00000184445/ENSG00000071539/ENSG00000134057/ENSG00000167513/ENSG00000178295/ENSG00000174442/ENSG00000040275
GO:0031577	BP	GO:0031577	spindle checkpoint signaling	18	0.79810187518996	2.43989901231811	0.000154631204577084	0.0021264953618104	0.00145866135019434	288	tags=89%, list=18%, signal=74%	ENSG00000117724/ENSG00000112742/ENSG00000156970/ENSG00000178999/ENSG00000169679/ENSG00000080986/ENSG00000166851/ENSG00000164109/ENSG00000122952/ENSG00000184445/ENSG00000071539/ENSG00000134057/ENSG00000167513/ENSG00000178295/ENSG00000174442/ENSG00000040275
GO:0071173	BP	GO:0071173	spindle assembly checkpoint signaling	18	0.79810187518996	2.43989901231811	0.000154631204577084	0.0021264953618104	0.00145866135019434	288	tags=89%, list=18%, signal=74%	ENSG00000117724/ENSG00000112742/ENSG00000156970/ENSG00000178999/ENSG00000169679/ENSG00000080986/ENSG00000166851/ENSG00000164109/ENSG00000122952/ENSG00000184445/ENSG00000071539/ENSG00000134057/ENSG00000167513/ENSG00000178295/ENSG00000174442/ENSG00000040275
GO:0071174	BP	GO:0071174	mitotic spindle checkpoint signaling	18	0.79810187518996	2.43989901231811	0.000154631204577084	0.0021264953618104	0.00145866135019434	288	tags=89%, list=18%, signal=74%	ENSG00000117724/ENSG00000112742/ENSG00000156970/ENSG00000178999/ENSG00000169679/ENSG00000080986/ENSG00000166851/ENSG00000164109/ENSG00000122952/ENSG00000184445/ENSG00000071539/ENSG00000134057/ENSG00000167513/ENSG00000178295/ENSG00000174442/ENSG00000040275
GO:0007018	BP	GO:0007018	microtubule-based movement	33	0.69187012159265	2.43483398941841	0.000143554407120299	0.0021264953618104	0.00145866135019434	156	tags=45%, list=10%, signal=42%	ENSG00000138778/ENSG00000186185/ENSG00000121621/ENSG00000118193/ENSG00000237649/ENSG00000163808/ENSG00000138182/ENSG00000138160/ENSG00000126787/ENSG00000142945/ENSG00000090889/ENSG00000137807/ENSG00000112984/ENSG00000079616/ENSG00000186638
GO:0006302	BP	GO:0006302	double-strand break repair	69	0.595546869757515	2.43437970922998	0.000128402670775552	0.0021264953618104	0.00145866135019434	419	tags=64%, list=26%, signal=49%	ENSG00000171320/ENSG00000154920/ENSG00000136492/ENSG00000051341/ENSG00000093009/ENSG00000100206/ENSG00000197299/ENSG00000085999/ENSG00000111247/ENSG00000012048/ENSG00000196584/ENSG00000144554/ENSG00000127423/ENSG00000125885/ENSG00000147536/ENSG00000160957/ENSG00000139618/ENSG00000146670/ENSG00000071539/ENSG00000100297/ENSG00000111602/ENSG00000181544/ENSG00000131153/ENSG00000138346/ENSG00000188486…
GO:1901991	BP	GO:1901991	negative regulation of mitotic cell cycle phase transition	46	0.644711001635972	2.43314400227818	0.000136780194227876	0.0021264953618104	0.00145866135019434	294	tags=61%, list=18%, signal=51%	ENSG00000117724/ENSG00000112742/ENSG00000170312/ENSG00000156970/ENSG00000178999/ENSG00000075218/ENSG00000169679/ENSG00000080986/ENSG00000197299/ENSG00000092853/ENSG00000012048/ENSG00000143476/ENSG00000166851/ENSG00000164109/ENSG00000094804/ENSG00000122952/ENSG00000184445/ENSG00000071539/ENSG00000085840/ENSG00000106462/ENSG00000134057/ENSG00000167513/ENSG00000112029/ENSG00000080839/ENSG00000178295…
GO:0007127	BP	GO:0007127	meiosis I	34	0.684866384780613	2.42967147030299	0.000142571998859424	0.0021264953618104	0.00145866135019434	310	tags=71%, list=19%, signal=58%	ENSG00000131747/ENSG00000129810/ENSG00000135476/ENSG00000154920/ENSG00000136492/ENSG00000080986/ENSG00000185697/ENSG00000163535/ENSG00000100206/ENSG00000085999/ENSG00000111247/ENSG00000087586/ENSG00000144554/ENSG00000157456/ENSG00000166851/ENSG00000121211/ENSG00000139618/ENSG00000071539/ENSG00000164611/ENSG00000175305/ENSG00000112029/ENSG00000131470/ENSG00000187790/ENSG00000051180
GO:0005815	CC	GO:0005815	microtubule organizing center	132	0.537464850934593	2.42501334949029	0.000117137167623287	0.0021264953618104	0.00145866135019434	417	tags=57%, list=26%, signal=46%	ENSG00000066279/ENSG00000131747/ENSG00000117724/ENSG00000117650/ENSG00000121621/ENSG00000169607/ENSG00000170312/ENSG00000237649/ENSG00000163808/ENSG00000156970/ENSG00000129810/ENSG00000178999/ENSG00000138182/ENSG00000072571/ENSG00000126787/ENSG00000142945/ENSG00000135476/ENSG00000076382/ENSG00000137807/ENSG00000138180/ENSG00000117399/ENSG00000080986/ENSG00000093009/ENSG00000165480/ENSG00000142731…
GO:0005813	CC	GO:0005813	centrosome	112	0.548105709869168	2.41440793809927	0.00012025012025012	0.0021264953618104	0.00145866135019434	456	tags=62%, list=28%, signal=48%	ENSG00000066279/ENSG00000117724/ENSG00000117650/ENSG00000169607/ENSG00000170312/ENSG00000163808/ENSG00000129810/ENSG00000178999/ENSG00000138182/ENSG00000072571/ENSG00000126787/ENSG00000142945/ENSG00000135476/ENSG00000076382/ENSG00000137807/ENSG00000138180/ENSG00000117399/ENSG00000080986/ENSG00000093009/ENSG00000165480/ENSG00000142731/ENSG00000075702/ENSG00000013810/ENSG00000196584/ENSG00000087586…
GO:0051225	BP	GO:0051225	spindle assembly	33	0.685824759633519	2.41355911091587	0.000143554407120299	0.0021264953618104	0.00145866135019434	243	tags=61%, list=15%, signal=53%	ENSG00000066279/ENSG00000117650/ENSG00000237649/ENSG00000163808/ENSG00000178999/ENSG00000138160/ENSG00000090889/ENSG00000076382/ENSG00000137807/ENSG00000117399/ENSG00000080986/ENSG00000088325/ENSG00000198901/ENSG00000101057/ENSG00000087586/ENSG00000157456/ENSG00000166851/ENSG00000161800/ENSG00000149503/ENSG00000112029
GO:0045132	BP	GO:0045132	meiotic chromosome segregation	29	0.705247792032408	2.40967780471475	0.000145900204260286	0.0021264953618104	0.00145866135019434	230	tags=62%, list=14%, signal=54%	ENSG00000131747/ENSG00000112742/ENSG00000143228/ENSG00000121152/ENSG00000156970/ENSG00000129810/ENSG00000135476/ENSG00000169679/ENSG00000154920/ENSG00000136492/ENSG00000163535/ENSG00000100206/ENSG00000144554/ENSG00000166851/ENSG00000071539/ENSG00000164611/ENSG00000113810/ENSG00000175305
GO:0005876	CC	GO:0005876	spindle microtubule	24	0.735673877416152	2.40889484142696	0.000148853825543316	0.0021264953618104	0.00145866135019434	176	tags=58%, list=11%, signal=53%	ENSG00000138778/ENSG00000186185/ENSG00000121621/ENSG00000170312/ENSG00000154839/ENSG00000178999/ENSG00000138160/ENSG00000090889/ENSG00000165480/ENSG00000198901/ENSG00000089685/ENSG00000087586/ENSG00000166851/ENSG00000184445
GO:0006974	BP	GO:0006974	cellular response to DNA damage stimulus	156	0.522335112702216	2.40550582052427	0.000114929318469141	0.0021264953618104	0.00145866135019434	429	tags=54%, list=27%, signal=44%	ENSG00000131747/ENSG00000065328/ENSG00000170312/ENSG00000171320/ENSG00000109674/ENSG00000075218/ENSG00000174371/ENSG00000154920/ENSG00000136492/ENSG00000051341/ENSG00000093009/ENSG00000100206/ENSG00000197299/ENSG00000085999/ENSG00000111247/ENSG00000187741/ENSG00000092853/ENSG00000012048/ENSG00000196584/ENSG00000144554/ENSG00000127423/ENSG00000276043/ENSG00000165490/ENSG00000125885/ENSG00000143476…
GO:0051656	BP	GO:0051656	establishment of organelle localization	57	0.609606522874544	2.40388741800475	0.000132257637878587	0.0021264953618104	0.00145866135019434	241	tags=46%, list=15%, signal=40%	ENSG00000138778/ENSG00000117724/ENSG00000121621/ENSG00000143228/ENSG00000118193/ENSG00000237649/ENSG00000137804/ENSG00000178999/ENSG00000126787/ENSG00000142945/ENSG00000135476/ENSG00000076382/ENSG00000080986/ENSG00000101447/ENSG00000115163/ENSG00000134690/ENSG00000186193/ENSG00000166851/ENSG00000164109/ENSG00000079616/ENSG00000146670/ENSG00000149503/ENSG00000169994/ENSG00000134057/ENSG00000167513…
GO:0016887	MF	GO:0016887	ATP hydrolysis activity	57	0.605502536067117	2.38770399167999	0.000132257637878587	0.0021264953618104	0.00145866135019434	397	tags=58%, list=25%, signal=45%	ENSG00000186871/ENSG00000186185/ENSG00000121621/ENSG00000118193/ENSG00000237649/ENSG00000163808/ENSG00000138182/ENSG00000142945/ENSG00000137807/ENSG00000136492/ENSG00000197299/ENSG00000085999/ENSG00000127586/ENSG00000112984/ENSG00000125885/ENSG00000156802/ENSG00000079616/ENSG00000160957/ENSG00000071539/ENSG00000100297/ENSG00000085840/ENSG00000176208/ENSG00000113810/ENSG00000138346/ENSG00000187790…
GO:0045930	BP	GO:0045930	negative regulation of mitotic cell cycle	54	0.609861247232213	2.37825982528898	0.000133564845732603	0.0021264953618104	0.00145866135019434	294	tags=57%, list=18%, signal=49%	ENSG00000117724/ENSG00000112742/ENSG00000170312/ENSG00000156970/ENSG00000178999/ENSG00000075218/ENSG00000169679/ENSG00000154920/ENSG00000080986/ENSG00000197299/ENSG00000092853/ENSG00000012048/ENSG00000144554/ENSG00000143476/ENSG00000166851/ENSG00000164109/ENSG00000094804/ENSG00000122952/ENSG00000184445/ENSG00000071539/ENSG00000085840/ENSG00000106462/ENSG00000134057/ENSG00000167513/ENSG00000112029…
GO:0007080	BP	GO:0007080	mitotic metaphase plate congression	21	0.748611326019677	2.37198893214245	0.000151699029126214	0.0021264953618104	0.00145866135019434	288	tags=71%, list=18%, signal=59%	ENSG00000138778/ENSG00000121621/ENSG00000143228/ENSG00000118193/ENSG00000237649/ENSG00000178999/ENSG00000142945/ENSG00000080986/ENSG00000134690/ENSG00000079616/ENSG00000146670/ENSG00000134057/ENSG00000167513/ENSG00000134222/ENSG00000040275
GO:1902749	BP	GO:1902749	regulation of cell cycle G2/M phase transition	33	0.673653000934883	2.37072417576616	0.000143554407120299	0.0021264953618104	0.00145866135019434	320	tags=67%, list=20%, signal=55%	ENSG00000117724/ENSG00000118193/ENSG00000170312/ENSG00000178999/ENSG00000158402/ENSG00000197299/ENSG00000092853/ENSG00000012048/ENSG00000087586/ENSG00000143476/ENSG00000166851/ENSG00000094804/ENSG00000161692/ENSG00000085840/ENSG00000176208/ENSG00000134057/ENSG00000112029/ENSG00000164045/ENSG00000123374/ENSG00000097046/ENSG00000167325/ENSG00000149948
GO:0010389	BP	GO:0010389	regulation of G2/M transition of mitotic cell cycle	31	0.67778405647082	2.35389059461559	0.000144592249855408	0.0021264953618104	0.00145866135019434	320	tags=68%, list=20%, signal=55%	ENSG00000117724/ENSG00000118193/ENSG00000170312/ENSG00000178999/ENSG00000158402/ENSG00000197299/ENSG00000092853/ENSG00000012048/ENSG00000087586/ENSG00000143476/ENSG00000166851/ENSG00000094804/ENSG00000161692/ENSG00000085840/ENSG00000134057/ENSG00000112029/ENSG00000164045/ENSG00000123374/ENSG00000097046/ENSG00000167325/ENSG00000149948
GO:0140657	MF	GO:0140657	ATP-dependent activity	87	0.553288485306386	2.35295457622569	0.000124007936507937	0.0021264953618104	0.00145866135019434	225	tags=40%, list=14%, signal=37%	ENSG00000186871/ENSG00000138778/ENSG00000131747/ENSG00000186185/ENSG00000121621/ENSG00000118193/ENSG00000237649/ENSG00000163808/ENSG00000138182/ENSG00000138160/ENSG00000142945/ENSG00000090889/ENSG00000137807/ENSG00000136492/ENSG00000051341/ENSG00000100206/ENSG00000197299/ENSG00000085999/ENSG00000127586/ENSG00000112984/ENSG00000196584/ENSG00000119969/ENSG00000125885/ENSG00000156802/ENSG00000138658…
GO:0000725	BP	GO:0000725	recombinational repair	47	0.619510207997569	2.35116486934854	0.000136184120931499	0.0021264953618104	0.00145866135019434	468	tags=74%, list=29%, signal=54%	ENSG00000051341/ENSG00000093009/ENSG00000100206/ENSG00000197299/ENSG00000085999/ENSG00000111247/ENSG00000012048/ENSG00000196584/ENSG00000127423/ENSG00000125885/ENSG00000147536/ENSG00000160957/ENSG00000139618/ENSG00000100297/ENSG00000111602/ENSG00000181544/ENSG00000131153/ENSG00000188486/ENSG00000178295/ENSG00000146263/ENSG00000097046/ENSG00000187790/ENSG00000051180/ENSG00000185480/ENSG00000160949…
GO:0000724	BP	GO:0000724	double-strand break repair via homologous recombination	46	0.622677500957193	2.34998941070192	0.000136780194227876	0.0021264953618104	0.00145866135019434	419	tags=70%, list=26%, signal=53%	ENSG00000051341/ENSG00000093009/ENSG00000100206/ENSG00000197299/ENSG00000085999/ENSG00000111247/ENSG00000012048/ENSG00000196584/ENSG00000127423/ENSG00000125885/ENSG00000147536/ENSG00000160957/ENSG00000139618/ENSG00000100297/ENSG00000111602/ENSG00000181544/ENSG00000131153/ENSG00000188486/ENSG00000178295/ENSG00000146263/ENSG00000097046/ENSG00000187790/ENSG00000051180/ENSG00000185480/ENSG00000160949…
GO:0031570	BP	GO:0031570	DNA integrity checkpoint signaling	33	0.663347518333958	2.33445705202286	0.000143554407120299	0.0021264953618104	0.00145866135019434	320	tags=64%, list=20%, signal=52%	ENSG00000170312/ENSG00000075218/ENSG00000154920/ENSG00000136492/ENSG00000093009/ENSG00000197299/ENSG00000092853/ENSG00000012048/ENSG00000144554/ENSG00000143476/ENSG00000166851/ENSG00000094804/ENSG00000085840/ENSG00000101412/ENSG00000111602/ENSG00000092470/ENSG00000167513/ENSG00000138346/ENSG00000188486/ENSG00000123374/ENSG00000149948
GO:0140097	MF	GO:0140097	catalytic activity, acting on DNA	57	0.591254708844873	2.33151992653589	0.000132257637878587	0.0021264953618104	0.00145866135019434	568	tags=79%, list=35%, signal=53%	ENSG00000186871/ENSG00000131747/ENSG00000109674/ENSG00000174371/ENSG00000136492/ENSG00000051341/ENSG00000100206/ENSG00000197299/ENSG00000085999/ENSG00000127586/ENSG00000196584/ENSG00000125885/ENSG00000138658/ENSG00000160957/ENSG00000100297/ENSG00000133119/ENSG00000176208/ENSG00000138346/ENSG00000178295/ENSG00000101868/ENSG00000187790/ENSG00000051180/ENSG00000062822/ENSG00000149948/ENSG00000100479…
GO:0065004	BP	GO:0065004	protein-DNA complex assembly	35	0.648735632242322	2.31650128415266	0.000141783638168155	0.0021264953618104	0.00145866135019434	310	tags=60%, list=19%, signal=50%	ENSG00000138778/ENSG00000117724/ENSG00000123485/ENSG00000126787/ENSG00000093009/ENSG00000100206/ENSG00000115163/ENSG00000102384/ENSG00000105011/ENSG00000119969/ENSG00000123219/ENSG00000104147/ENSG00000184445/ENSG00000167513/ENSG00000188486/ENSG00000138092/ENSG00000164104/ENSG00000166451/ENSG00000167670/ENSG00000159055/ENSG00000051180
GO:0000228	CC	GO:0000228	nuclear chromosome	59	0.579808884262689	2.29895033678857	0.000131995776135164	0.0021264953618104	0.00145866135019434	429	tags=66%, list=27%, signal=50%	ENSG00000131747/ENSG00000117650/ENSG00000065328/ENSG00000093009/ENSG00000100206/ENSG00000197299/ENSG00000089685/ENSG00000012048/ENSG00000166851/ENSG00000147536/ENSG00000198056/ENSG00000139618/ENSG00000100297/ENSG00000085840/ENSG00000111602/ENSG00000149503/ENSG00000131153/ENSG00000091651/ENSG00000101945/ENSG00000188486/ENSG00000146263/ENSG00000014138/ENSG00000131470/ENSG00000101868/ENSG00000051180…
GO:0051233	CC	GO:0051233	spindle midzone	18	0.751009770936844	2.29593245588343	0.000154631204577084	0.0021264953618104	0.00145866135019434	222	tags=72%, list=14%, signal=63%	ENSG00000138778/ENSG00000186185/ENSG00000121621/ENSG00000118193/ENSG00000178999/ENSG00000138182/ENSG00000198901/ENSG00000134690/ENSG00000087586/ENSG00000166851/ENSG00000094804/ENSG00000161800/ENSG00000149503
GO:0140694	BP	GO:0140694	non-membrane-bounded organelle assembly	88	0.53811757641813	2.29054523241212	0.000123915737298637	0.0021264953618104	0.00145866135019434	222	tags=35%, list=14%, signal=32%	ENSG00000066279/ENSG00000138778/ENSG00000117724/ENSG00000117650/ENSG00000237649/ENSG00000163808/ENSG00000178999/ENSG00000011426/ENSG00000138160/ENSG00000126787/ENSG00000090889/ENSG00000076382/ENSG00000137807/ENSG00000117399/ENSG00000080986/ENSG00000115163/ENSG00000088325/ENSG00000198901/ENSG00000142731/ENSG00000101057/ENSG00000075702/ENSG00000012048/ENSG00000087586/ENSG00000157456/ENSG00000123219…
GO:0033043	BP	GO:0033043	regulation of organelle organization	168	0.491899519412602	2.28559115888601	0.000113481615978212	0.0021264953618104	0.00145866135019434	296	tags=40%, list=18%, signal=36%	ENSG00000148773/ENSG00000138778/ENSG00000183856/ENSG00000131747/ENSG00000117724/ENSG00000117650/ENSG00000121621/ENSG00000112742/ENSG00000109805/ENSG00000154839/ENSG00000121152/ENSG00000163808/ENSG00000137804/ENSG00000156970/ENSG00000156509/ENSG00000178999/ENSG00000138182/ENSG00000126787/ENSG00000135476/ENSG00000076382/ENSG00000169679/ENSG00000117399/ENSG00000080986/ENSG00000175063/ENSG00000158402…
GO:0032508	BP	GO:0032508	DNA duplex unwinding	33	0.648081511855699	2.28073281925735	0.000143554407120299	0.0021264953618104	0.00145866135019434	397	tags=70%, list=25%, signal=54%	ENSG00000186871/ENSG00000131747/ENSG00000136492/ENSG00000051341/ENSG00000093009/ENSG00000197299/ENSG00000085999/ENSG00000127586/ENSG00000125885/ENSG00000147536/ENSG00000160957/ENSG00000100297/ENSG00000133119/ENSG00000131153/ENSG00000138346/ENSG00000187790/ENSG00000051180/ENSG00000101003/ENSG00000140451/ENSG00000112118/ENSG00000163918/ENSG00000073111/ENSG00000166508
GO:0032392	BP	GO:0032392	DNA geometric change	36	0.633719452219951	2.27643798815629	0.000141302811925957	0.0021264953618104	0.00145866135019434	397	tags=67%, list=25%, signal=51%	ENSG00000186871/ENSG00000131747/ENSG00000136492/ENSG00000051341/ENSG00000093009/ENSG00000197299/ENSG00000085999/ENSG00000127586/ENSG00000125885/ENSG00000147536/ENSG00000160957/ENSG00000100297/ENSG00000133119/ENSG00000131153/ENSG00000138346/ENSG00000164104/ENSG00000187790/ENSG00000051180/ENSG00000101003/ENSG00000140451/ENSG00000112118/ENSG00000163918/ENSG00000073111/ENSG00000166508
GO:0007098	BP	GO:0007098	centrosome cycle	38	0.622579380622489	2.2657749382761	0.00013986013986014	0.0021264953618104	0.00145866135019434	411	tags=66%, list=25%, signal=50%	ENSG00000117650/ENSG00000170312/ENSG00000129810/ENSG00000138160/ENSG00000080986/ENSG00000142731/ENSG00000075702/ENSG00000012048/ENSG00000196584/ENSG00000087586/ENSG00000166851/ENSG00000139618/ENSG00000162063/ENSG00000156876/ENSG00000123473/ENSG00000166803/ENSG00000178295/ENSG00000151849/ENSG00000123374/ENSG00000130695/ENSG00000249115/ENSG00000214367/ENSG00000112877/ENSG00000166004/ENSG00000103995
GO:0031023	BP	GO:0031023	microtubule organizing center organization	38	0.622579380622489	2.2657749382761	0.00013986013986014	0.0021264953618104	0.00145866135019434	411	tags=66%, list=25%, signal=50%	ENSG00000117650/ENSG00000170312/ENSG00000129810/ENSG00000138160/ENSG00000080986/ENSG00000142731/ENSG00000075702/ENSG00000012048/ENSG00000196584/ENSG00000087586/ENSG00000166851/ENSG00000139618/ENSG00000162063/ENSG00000156876/ENSG00000123473/ENSG00000166803/ENSG00000178295/ENSG00000151849/ENSG00000123374/ENSG00000130695/ENSG00000249115/ENSG00000214367/ENSG00000112877/ENSG00000166004/ENSG00000103995
GO:0071103	BP	GO:0071103	DNA conformation change	37	0.625712089305574	2.26034247143353	0.000140726146918097	0.0021264953618104	0.00145866135019434	397	tags=65%, list=25%, signal=50%	ENSG00000186871/ENSG00000131747/ENSG00000136492/ENSG00000051341/ENSG00000093009/ENSG00000197299/ENSG00000085999/ENSG00000127586/ENSG00000125885/ENSG00000147536/ENSG00000160957/ENSG00000100297/ENSG00000133119/ENSG00000131153/ENSG00000138346/ENSG00000164104/ENSG00000187790/ENSG00000051180/ENSG00000101003/ENSG00000140451/ENSG00000112118/ENSG00000163918/ENSG00000073111/ENSG00000166508
GO:0071824	BP	GO:0071824	protein-DNA complex subunit organization	38	0.621056215434935	2.26023162987844	0.00013986013986014	0.0021264953618104	0.00145866135019434	310	tags=55%, list=19%, signal=46%	ENSG00000138778/ENSG00000117724/ENSG00000123485/ENSG00000126787/ENSG00000093009/ENSG00000100206/ENSG00000115163/ENSG00000102384/ENSG00000105011/ENSG00000119969/ENSG00000123219/ENSG00000104147/ENSG00000184445/ENSG00000167513/ENSG00000188486/ENSG00000138092/ENSG00000164104/ENSG00000166451/ENSG00000167670/ENSG00000159055/ENSG00000051180
GO:0022412	BP	GO:0022412	cellular process involved in reproduction in multicellular organism	36	0.628147168140205	2.25642130866902	0.000141302811925957	0.0021264953618104	0.00145866135019434	281	tags=58%, list=17%, signal=49%	ENSG00000066279/ENSG00000131747/ENSG00000121621/ENSG00000112742/ENSG00000137812/ENSG00000121152/ENSG00000136492/ENSG00000080986/ENSG00000185697/ENSG00000100206/ENSG00000187741/ENSG00000087586/ENSG00000157456/ENSG00000166851/ENSG00000139618/ENSG00000071539/ENSG00000138587/ENSG00000112029/ENSG00000164104/ENSG00000057657/ENSG00000120539
GO:0034502	BP	GO:0034502	protein localization to chromosome	32	0.640150591379794	2.24082072048696	0.000144050705848459	0.0021264953618104	0.00145866135019434	288	tags=56%, list=18%, signal=47%	ENSG00000112742/ENSG00000137812/ENSG00000170312/ENSG00000171320/ENSG00000178999/ENSG00000080986/ENSG00000115163/ENSG00000125885/ENSG00000166851/ENSG00000139618/ENSG00000146670/ENSG00000184445/ENSG00000106462/ENSG00000177602/ENSG00000167513/ENSG00000174442/ENSG00000172167/ENSG00000040275
GO:0008094	MF	GO:0008094	ATP-dependent activity, acting on DNA	38	0.612287731530077	2.22832017939249	0.00013986013986014	0.0021264953618104	0.00145866135019434	568	tags=84%, list=35%, signal=56%	ENSG00000186871/ENSG00000131747/ENSG00000136492/ENSG00000051341/ENSG00000100206/ENSG00000197299/ENSG00000085999/ENSG00000127586/ENSG00000196584/ENSG00000125885/ENSG00000160957/ENSG00000100297/ENSG00000133119/ENSG00000176208/ENSG00000138346/ENSG00000187790/ENSG00000051180/ENSG00000140451/ENSG00000112118/ENSG00000163918/ENSG00000073111/ENSG00000166508/ENSG00000116830/ENSG00000104738/ENSG00000013573…
GO:0007292	BP	GO:0007292	female gamete generation	25	0.671467891971179	2.22557125643469	0.000147579693034238	0.0021264953618104	0.00145866135019434	303	tags=64%, list=19%, signal=53%	ENSG00000066279/ENSG00000131747/ENSG00000112742/ENSG00000121152/ENSG00000080986/ENSG00000100206/ENSG00000087586/ENSG00000157456/ENSG00000125885/ENSG00000166851/ENSG00000154734/ENSG00000139618/ENSG00000071539/ENSG00000112029/ENSG00000120539/ENSG00000104368
GO:0044843	BP	GO:0044843	cell cycle G1/S phase transition	37	0.613531800082007	2.21634200298018	0.000140726146918097	0.0021264953618104	0.00145866135019434	325	tags=62%, list=20%, signal=51%	ENSG00000183856/ENSG00000118193/ENSG00000171848/ENSG00000075218/ENSG00000101447/ENSG00000145386/ENSG00000100526/ENSG00000154734/ENSG00000094804/ENSG00000101412/ENSG00000156876/ENSG00000123473/ENSG00000106462/ENSG00000175305/ENSG00000123080/ENSG00000080839/ENSG00000172167/ENSG00000164045/ENSG00000151849/ENSG00000123374/ENSG00000097046/ENSG00000167325/ENSG00000006634
GO:0051302	BP	GO:0051302	regulation of cell division	38	0.607956471509943	2.21255727315078	0.00013986013986014	0.0021264953618104	0.00145866135019434	250	tags=55%, list=15%, signal=48%	ENSG00000066279/ENSG00000186185/ENSG00000118193/ENSG00000129173/ENSG00000178999/ENSG00000138182/ENSG00000137807/ENSG00000197299/ENSG00000198901/ENSG00000142731/ENSG00000112984/ENSG00000087586/ENSG00000122966/ENSG00000166851/ENSG00000094804/ENSG00000139618/ENSG00000161800/ENSG00000114346/ENSG00000091651/ENSG00000080839/ENSG00000150630
GO:0051052	BP	GO:0051052	regulation of DNA metabolic process	87	0.519611271948383	2.20973642621962	0.000124007936507937	0.0021264953618104	0.00145866135019434	401	tags=53%, list=25%, signal=42%	ENSG00000117650/ENSG00000170312/ENSG00000171320/ENSG00000129173/ENSG00000178999/ENSG00000051341/ENSG00000197299/ENSG00000111247/ENSG00000127586/ENSG00000145386/ENSG00000012048/ENSG00000127423/ENSG00000147536/ENSG00000094804/ENSG00000139618/ENSG00000161692/ENSG00000077264/ENSG00000133119/ENSG00000176208/ENSG00000111602/ENSG00000181544/ENSG00000167513/ENSG00000131153/ENSG00000112029/ENSG00000138346…
GO:0071459	BP	GO:0071459	protein localization to chromosome, centromeric region	17	0.732372690301705	2.20802570825645	0.00015605493133583	0.0021264953618104	0.00145866135019434	328	tags=76%, list=20%, signal=62%	ENSG00000112742/ENSG00000137812/ENSG00000170312/ENSG00000178999/ENSG00000080986/ENSG00000115163/ENSG00000184445/ENSG00000177602/ENSG00000167513/ENSG00000174442/ENSG00000172167/ENSG00000040275/ENSG00000031691
GO:0010639	BP	GO:0010639	negative regulation of organelle organization	56	0.558477245370357	2.19656429256347	0.000132520540683806	0.0021264953618104	0.00145866135019434	292	tags=50%, list=18%, signal=42%	ENSG00000131747/ENSG00000117724/ENSG00000112742/ENSG00000156970/ENSG00000156509/ENSG00000178999/ENSG00000135476/ENSG00000169679/ENSG00000080986/ENSG00000088325/ENSG00000012048/ENSG00000166851/ENSG00000164109/ENSG00000186638/ENSG00000136108/ENSG00000162063/ENSG00000122952/ENSG00000184445/ENSG00000071539/ENSG00000164611/ENSG00000134057/ENSG00000167513/ENSG00000112029/ENSG00000178295/ENSG00000174442…
GO:0034508	BP	GO:0034508	centromere complex assembly	19	0.707401207413837	2.19272956087542	0.000153704272978789	0.0021264953618104	0.00145866135019434	284	tags=68%, list=18%, signal=57%	ENSG00000138778/ENSG00000117724/ENSG00000123485/ENSG00000126787/ENSG00000115163/ENSG00000102384/ENSG00000119969/ENSG00000123219/ENSG00000104147/ENSG00000184445/ENSG00000138092/ENSG00000166451/ENSG00000159055
GO:0032886	BP	GO:0032886	regulation of microtubule-based process	42	0.590284080506804	2.19247818140689	0.000137931034482759	0.0021264953618104	0.00145866135019434	293	tags=50%, list=18%, signal=42%	ENSG00000121621/ENSG00000154839/ENSG00000163808/ENSG00000076382/ENSG00000088325/ENSG00000165480/ENSG00000142731/ENSG00000075702/ENSG00000013810/ENSG00000012048/ENSG00000087586/ENSG00000166851/ENSG00000136108/ENSG00000162063/ENSG00000156876/ENSG00000123473/ENSG00000134222/ENSG00000178295/ENSG00000136122/ENSG00000117632/ENSG00000151849
GO:0051640	BP	GO:0051640	organelle localization	77	0.524862223414766	2.18518185105514	0.000126694539465349	0.0021264953618104	0.00145866135019434	241	tags=35%, list=15%, signal=31%	ENSG00000066279/ENSG00000138778/ENSG00000117724/ENSG00000121621/ENSG00000143228/ENSG00000118193/ENSG00000237649/ENSG00000137804/ENSG00000178999/ENSG00000126787/ENSG00000142945/ENSG00000135476/ENSG00000076382/ENSG00000080986/ENSG00000101447/ENSG00000115163/ENSG00000134690/ENSG00000186193/ENSG00000166851/ENSG00000164109/ENSG00000079616/ENSG00000146670/ENSG00000149503/ENSG00000169994/ENSG00000134057…
GO:0006275	BP	GO:0006275	regulation of DNA replication	38	0.599663642465626	2.18237689005291	0.00013986013986014	0.0021264953618104	0.00145866135019434	325	tags=55%, list=20%, signal=45%	ENSG00000170312/ENSG00000171320/ENSG00000129173/ENSG00000197299/ENSG00000127586/ENSG00000145386/ENSG00000147536/ENSG00000094804/ENSG00000139618/ENSG00000161692/ENSG00000133119/ENSG00000176208/ENSG00000111602/ENSG00000167513/ENSG00000131153/ENSG00000112029/ENSG00000138346/ENSG00000123374/ENSG00000115355/ENSG00000097046/ENSG00000006634
GO:0140640	MF	GO:0140640	catalytic activity, acting on a nucleic acid	77	0.517520902345842	2.15461740795575	0.000126694539465349	0.0021264953618104	0.00145866135019434	568	tags=66%, list=35%, signal=45%	ENSG00000186871/ENSG00000131747/ENSG00000109674/ENSG00000174371/ENSG00000136492/ENSG00000051341/ENSG00000100206/ENSG00000197299/ENSG00000085999/ENSG00000127586/ENSG00000196584/ENSG00000119969/ENSG00000125885/ENSG00000138658/ENSG00000198056/ENSG00000160957/ENSG00000100297/ENSG00000133119/ENSG00000104889/ENSG00000176208/ENSG00000138346/ENSG00000178295/ENSG00000154760/ENSG00000101868/ENSG00000187790…
GO:0005524	MF	GO:0005524	ATP binding	177	0.45933244353486	2.14567077200723	0.000112943302462164	0.0021264953618104	0.00145866135019434	398	tags=45%, list=25%, signal=38%	ENSG00000186871/ENSG00000148773/ENSG00000138778/ENSG00000131747/ENSG00000186185/ENSG00000117650/ENSG00000121621/ENSG00000112742/ENSG00000118193/ENSG00000170312/ENSG00000237649/ENSG00000163808/ENSG00000156970/ENSG00000178999/ENSG00000138182/ENSG00000138160/ENSG00000142945/ENSG00000090889/ENSG00000168078/ENSG00000169679/ENSG00000137807/ENSG00000136492/ENSG00000051341/ENSG00000175063/ENSG00000100206…
GO:0003697	MF	GO:0003697	single-stranded DNA binding	33	0.60445491012105	2.12720178874859	0.000143554407120299	0.0021264953618104	0.00145866135019434	514	tags=76%, list=32%, signal=53%	ENSG00000065328/ENSG00000109674/ENSG00000093009/ENSG00000100206/ENSG00000197299/ENSG00000085999/ENSG00000111247/ENSG00000125885/ENSG00000160957/ENSG00000139618/ENSG00000100297/ENSG00000113810/ENSG00000164104/ENSG00000101868/ENSG00000051180/ENSG00000136824/ENSG00000166801/ENSG00000112118/ENSG00000073111/ENSG00000166508/ENSG00000125319/ENSG00000070950/ENSG00000104738/ENSG00000013573/ENSG00000163002
GO:0022414	BP	GO:0022414	reproductive process	163	0.459325081342153	2.12454944941798	0.000114324911398194	0.0021264953618104	0.00145866135019434	310	tags=41%, list=19%, signal=37%	ENSG00000066279/ENSG00000131747/ENSG00000117650/ENSG00000121621/ENSG00000112742/ENSG00000137812/ENSG00000143228/ENSG00000170312/ENSG00000121152/ENSG00000129173/ENSG00000156970/ENSG00000129810/ENSG00000156509/ENSG00000135476/ENSG00000169679/ENSG00000117399/ENSG00000174371/ENSG00000154920/ENSG00000136492/ENSG00000170961/ENSG00000080986/ENSG00000185697/ENSG00000158402/ENSG00000163535/ENSG00000100206…
GO:0032559	MF	GO:0032559	adenyl ribonucleotide binding	183	0.452751255523296	2.12416507216111	0.000112208258527828	0.0021264953618104	0.00145866135019434	398	tags=44%, list=25%, signal=37%	ENSG00000186871/ENSG00000148773/ENSG00000138778/ENSG00000131747/ENSG00000186185/ENSG00000117650/ENSG00000121621/ENSG00000112742/ENSG00000118193/ENSG00000170312/ENSG00000237649/ENSG00000163808/ENSG00000156970/ENSG00000178999/ENSG00000138182/ENSG00000138160/ENSG00000142945/ENSG00000090889/ENSG00000168078/ENSG00000169679/ENSG00000137807/ENSG00000136492/ENSG00000051341/ENSG00000175063/ENSG00000100206…
GO:0030554	MF	GO:0030554	adenyl nucleotide binding	184	0.451132113141836	2.11745863788434	0.000112283853581855	0.0021264953618104	0.00145866135019434	398	tags=43%, list=25%, signal=37%	ENSG00000186871/ENSG00000148773/ENSG00000138778/ENSG00000131747/ENSG00000186185/ENSG00000117650/ENSG00000121621/ENSG00000112742/ENSG00000118193/ENSG00000170312/ENSG00000237649/ENSG00000163808/ENSG00000156970/ENSG00000178999/ENSG00000138182/ENSG00000138160/ENSG00000142945/ENSG00000090889/ENSG00000168078/ENSG00000169679/ENSG00000137807/ENSG00000136492/ENSG00000051341/ENSG00000175063/ENSG00000100206…
GO:0000003	BP	GO:0000003	reproduction	165	0.456523895116048	2.1168142245693	0.000113934146063575	0.0021264953618104	0.00145866135019434	310	tags=41%, list=19%, signal=37%	ENSG00000066279/ENSG00000131747/ENSG00000117650/ENSG00000121621/ENSG00000112742/ENSG00000137812/ENSG00000143228/ENSG00000170312/ENSG00000121152/ENSG00000129173/ENSG00000156970/ENSG00000129810/ENSG00000156509/ENSG00000135476/ENSG00000169679/ENSG00000117399/ENSG00000174371/ENSG00000154920/ENSG00000136492/ENSG00000170961/ENSG00000080986/ENSG00000185697/ENSG00000158402/ENSG00000163535/ENSG00000100206…
GO:0000082	BP	GO:0000082	G1/S transition of mitotic cell cycle	35	0.592060393039092	2.11412568172097	0.000141783638168155	0.0021264953618104	0.00145866135019434	325	tags=60%, list=20%, signal=49%	ENSG00000183856/ENSG00000118193/ENSG00000171848/ENSG00000075218/ENSG00000100526/ENSG00000154734/ENSG00000094804/ENSG00000101412/ENSG00000156876/ENSG00000123473/ENSG00000106462/ENSG00000175305/ENSG00000123080/ENSG00000080839/ENSG00000172167/ENSG00000164045/ENSG00000151849/ENSG00000123374/ENSG00000097046/ENSG00000167325/ENSG00000006634
GO:0003678	MF	GO:0003678	DNA helicase activity	28	0.614446268531801	2.08420152456622	0.00014626298083955	0.0021264953618104	0.00145866135019434	568	tags=86%, list=35%, signal=57%	ENSG00000186871/ENSG00000136492/ENSG00000051341/ENSG00000197299/ENSG00000085999/ENSG00000127586/ENSG00000125885/ENSG00000160957/ENSG00000100297/ENSG00000133119/ENSG00000138346/ENSG00000187790/ENSG00000051180/ENSG00000140451/ENSG00000112118/ENSG00000163918/ENSG00000073111/ENSG00000166508/ENSG00000104738/ENSG00000013573/ENSG00000111445/ENSG00000049541/ENSG00000085224/ENSG00000020922
GO:0008092	MF	GO:0008092	cytoskeletal protein binding	115	0.46423109708624	2.05742027166529	0.000119118522930316	0.0021264953618104	0.00145866135019434	180	tags=30%, list=11%, signal=28%	ENSG00000138778/ENSG00000183856/ENSG00000186185/ENSG00000117724/ENSG00000121621/ENSG00000118193/ENSG00000154839/ENSG00000237649/ENSG00000163808/ENSG00000137804/ENSG00000138182/ENSG00000011426/ENSG00000138160/ENSG00000178882/ENSG00000126787/ENSG00000142945/ENSG00000090889/ENSG00000075218/ENSG00000076382/ENSG00000137807/ENSG00000101447/ENSG00000088325/ENSG00000198901/ENSG00000089685/ENSG00000112984…
GO:0005814	CC	GO:0005814	centriole	35	0.568989347730518	2.03174373223666	0.000141783638168155	0.0021264953618104	0.00145866135019434	466	tags=69%, list=29%, signal=50%	ENSG00000131747/ENSG00000138180/ENSG00000142731/ENSG00000075702/ENSG00000087586/ENSG00000166851/ENSG00000186638/ENSG00000162063/ENSG00000185347/ENSG00000100629/ENSG00000156876/ENSG00000123473/ENSG00000164087/ENSG00000151849/ENSG00000115355/ENSG00000198707/ENSG00000198331/ENSG00000162062/ENSG00000166004/ENSG00000182504/ENSG00000103995/ENSG00000148019/ENSG00000151466/ENSG00000051825
GO:0070925	BP	GO:0070925	organelle assembly	127	0.434598342100289	1.95057992280728	0.000117453605825699	0.0021264953618104	0.00145866135019434	348	tags=36%, list=22%, signal=31%	ENSG00000066279/ENSG00000138778/ENSG00000117724/ENSG00000117650/ENSG00000137812/ENSG00000237649/ENSG00000163808/ENSG00000178999/ENSG00000011426/ENSG00000138160/ENSG00000126787/ENSG00000090889/ENSG00000076382/ENSG00000137807/ENSG00000117399/ENSG00000080986/ENSG00000115163/ENSG00000088325/ENSG00000198901/ENSG00000142731/ENSG00000101057/ENSG00000075702/ENSG00000012048/ENSG00000087586/ENSG00000172020…
GO:0030261	BP	GO:0030261	chromosome condensation	15	0.753661086561563	2.20303528891267	0.00015785319652723	0.00213747127121463	0.00146619023321882	355	tags=87%, list=22%, signal=68%	ENSG00000131747/ENSG00000170312/ENSG00000109805/ENSG00000121152/ENSG00000137804/ENSG00000166851/ENSG00000146670/ENSG00000146918/ENSG00000113810/ENSG00000151503/ENSG00000149948/ENSG00000136824/ENSG00000010292
GO:0005871	CC	GO:0005871	kinesin complex	13	0.881383190942676	2.47410018227919	0.000161238310222509	0.00215144020585076	0.00147577217043959	154	tags=85%, list=10%, signal=77%	ENSG00000186185/ENSG00000121621/ENSG00000118193/ENSG00000237649/ENSG00000163808/ENSG00000138182/ENSG00000138160/ENSG00000142945/ENSG00000137807/ENSG00000112984/ENSG00000079616
GO:0007143	BP	GO:0007143	female meiotic nuclear division	11	0.808608603585966	2.17385500611056	0.000164880461665293	0.00215144020585076	0.00147577217043959	281	tags=91%, list=17%, signal=76%	ENSG00000131747/ENSG00000112742/ENSG00000121152/ENSG00000080986/ENSG00000087586/ENSG00000157456/ENSG00000166851/ENSG00000071539/ENSG00000112029/ENSG00000120539
GO:0051445	BP	GO:0051445	regulation of meiotic cell cycle	12	0.787924770475815	2.16469518705251	0.000163025758069775	0.00215144020585076	0.00147577217043959	283	tags=83%, list=18%, signal=69%	ENSG00000066279/ENSG00000112742/ENSG00000156509/ENSG00000117399/ENSG00000158402/ENSG00000111247/ENSG00000071539/ENSG00000106003/ENSG00000112029/ENSG00000164045
GO:0051653	BP	GO:0051653	spindle localization	11	0.796321461404802	2.14082238016166	0.000164880461665293	0.00215144020585076	0.00147577217043959	152	tags=73%, list=9%, signal=66%	ENSG00000066279/ENSG00000137804/ENSG00000135476/ENSG00000080986/ENSG00000115163/ENSG00000186193/ENSG00000166851/ENSG00000164109
GO:1902808	BP	GO:1902808	positive regulation of cell cycle G1/S phase transition	12	0.771197341005923	2.11873929453326	0.000163025758069775	0.00215144020585076	0.00147577217043959	302	tags=83%, list=19%, signal=68%	ENSG00000171848/ENSG00000101447/ENSG00000154734/ENSG00000094804/ENSG00000156876/ENSG00000123473/ENSG00000106462/ENSG00000172167/ENSG00000151849/ENSG00000167325
GO:0045171	CC	GO:0045171	intercellular bridge	12	0.768057010992115	2.11011174845099	0.000163025758069775	0.00215144020585076	0.00147577217043959	161	tags=67%, list=10%, signal=60%	ENSG00000138182/ENSG00000138180/ENSG00000101447/ENSG00000088325/ENSG00000198901/ENSG00000134690/ENSG00000112984/ENSG00000094804
GO:0032467	BP	GO:0032467	positive regulation of cytokinesis	10	0.814595544654632	2.13909835248533	0.000165920026547204	0.0021519627539526	0.00147613061030899	213	tags=80%, list=13%, signal=70%	ENSG00000118193/ENSG00000178999/ENSG00000138182/ENSG00000137807/ENSG00000122966/ENSG00000094804/ENSG00000161800/ENSG00000114346
GO:0006468	BP	GO:0006468	protein phosphorylation	160	0.403665932258109	1.86412099618001	0.000229016374670789	0.00295252847105514	0.00202527559825476	340	tags=38%, list=21%, signal=33%	ENSG00000138778/ENSG00000183856/ENSG00000117650/ENSG00000112742/ENSG00000118193/ENSG00000170312/ENSG00000156970/ENSG00000178999/ENSG00000168078/ENSG00000169679/ENSG00000158402/ENSG00000197299/ENSG00000127564/ENSG00000088325/ENSG00000142731/ENSG00000092853/ENSG00000089685/ENSG00000145386/ENSG00000087586/ENSG00000157456/ENSG00000122966/ENSG00000166851/ENSG00000100526/ENSG00000094804/ENSG00000266524…
GO:0007276	BP	GO:0007276	gamete generation	74	0.47848358775043	1.98127026986099	0.000255004462578095	0.00326800361863475	0.0022416745676508	303	tags=43%, list=19%, signal=37%	ENSG00000066279/ENSG00000131747/ENSG00000121621/ENSG00000112742/ENSG00000137812/ENSG00000121152/ENSG00000136492/ENSG00000080986/ENSG00000185697/ENSG00000158402/ENSG00000100206/ENSG00000187741/ENSG00000105011/ENSG00000087586/ENSG00000144554/ENSG00000157456/ENSG00000125885/ENSG00000166851/ENSG00000154734/ENSG00000139618/ENSG00000071539/ENSG00000161800/ENSG00000164611/ENSG00000138587/ENSG00000101412…
GO:0051924	BP	GO:0051924	regulation of calcium ion transport	13	-0.687402865585448	-2.20432938953334	0.000263157894736842	0.003352538150109	0.00229966070579751	318	tags=69%, list=20%, signal=56%	ENSG00000164867/ENSG00000164949/ENSG00000144681/ENSG00000131981/ENSG00000164266/ENSG00000135124/ENSG00000155962/ENSG00000089041/ENSG00000163823
GO:0051054	BP	GO:0051054	positive regulation of DNA metabolic process	55	0.515098273688608	2.01692196430394	0.000266844563042028	0.00337950790723227	0.00231816050741774	639	tags=84%, list=40%, signal=52%	ENSG00000117650/ENSG00000170312/ENSG00000129173/ENSG00000178999/ENSG00000111247/ENSG00000127586/ENSG00000012048/ENSG00000147536/ENSG00000161692/ENSG00000077264/ENSG00000133119/ENSG00000176208/ENSG00000111602/ENSG00000181544/ENSG00000167513/ENSG00000131153/ENSG00000138346/ENSG00000188486/ENSG00000123374/ENSG00000097046/ENSG00000051180/ENSG00000109685/ENSG00000006634/ENSG00000112562/ENSG00000101003…
GO:0007204	BP	GO:0007204	positive regulation of cytosolic calcium ion concentration	19	-0.685655627582865	-2.46203537921434	0.000285959393766085	0.00338280535592517	0.00232042237972133	148	tags=53%, list=9%, signal=48%	ENSG00000164266/ENSG00000135124/ENSG00000135218/ENSG00000055732/ENSG00000144891/ENSG00000155962/ENSG00000089041/ENSG00000151882/ENSG00000135914/ENSG00000163823
GO:0051480	BP	GO:0051480	regulation of cytosolic calcium ion concentration	19	-0.685655627582865	-2.46203537921434	0.000285959393766085	0.00338280535592517	0.00232042237972133	148	tags=53%, list=9%, signal=48%	ENSG00000164266/ENSG00000135124/ENSG00000135218/ENSG00000055732/ENSG00000144891/ENSG00000155962/ENSG00000089041/ENSG00000151882/ENSG00000135914/ENSG00000163823
GO:0006694	BP	GO:0006694	steroid biosynthetic process	18	-0.664670103221066	-2.34558810417678	0.000282805429864253	0.00338280535592517	0.00232042237972133	507	tags=94%, list=31%, signal=66%	ENSG00000116133/ENSG00000132196/ENSG00000072310/ENSG00000141447/ENSG00000104763/ENSG00000067064/ENSG00000164211/ENSG00000125629/ENSG00000110921/ENSG00000172893/ENSG00000052802/ENSG00000167508/ENSG00000160285/ENSG00000186480/ENSG00000112972/ENSG00000169297/ENSG00000137869
GO:1905954	BP	GO:1905954	positive regulation of lipid localization	17	-0.663267765936935	-2.30307954414555	0.000278241513633834	0.00338280535592517	0.00232042237972133	287	tags=71%, list=18%, signal=59%	ENSG00000064687/ENSG00000108984/ENSG00000135245/ENSG00000073060/ENSG00000135124/ENSG00000025434/ENSG00000135218/ENSG00000147872/ENSG00000118785/ENSG00000137869/ENSG00000089041/ENSG00000121769
GO:0015850	BP	GO:0015850	organic hydroxy compound transport	18	-0.651929702854484	-2.30062785788696	0.000282805429864253	0.00338280535592517	0.00232042237972133	422	tags=83%, list=26%, signal=62%	ENSG00000100979/ENSG00000141447/ENSG00000091039/ENSG00000164211/ENSG00000130164/ENSG00000185345/ENSG00000073060/ENSG00000119655/ENSG00000141458/ENSG00000025434/ENSG00000178301/ENSG00000135218/ENSG00000144891/ENSG00000118785/ENSG00000137869
GO:0070588	BP	GO:0070588	calcium ion transmembrane transport	15	-0.67412860096729	-2.2509001683314	0.000272702481592582	0.00338280535592517	0.00232042237972133	289	tags=60%, list=18%, signal=50%	ENSG00000164949/ENSG00000144681/ENSG00000171227/ENSG00000135124/ENSG00000055732/ENSG00000155962/ENSG00000089041/ENSG00000135914/ENSG00000166473
GO:0032368	BP	GO:0032368	regulation of lipid transport	16	-0.642597140226999	-2.18375188150685	0.000277469478357381	0.00338280535592517	0.00232042237972133	340	tags=75%, list=21%, signal=60%	ENSG00000185950/ENSG00000185345/ENSG00000064687/ENSG00000108984/ENSG00000135124/ENSG00000132170/ENSG00000025434/ENSG00000144891/ENSG00000118785/ENSG00000137869/ENSG00000089041/ENSG00000121769
GO:0045834	BP	GO:0045834	positive regulation of lipid metabolic process	19	-0.604010939979932	-2.16886764118825	0.000285959393766085	0.00338280535592517	0.00232042237972133	351	tags=58%, list=22%, signal=46%	ENSG00000164211/ENSG00000185950/ENSG00000130164/ENSG00000073060/ENSG00000132170/ENSG00000119508/ENSG00000025434/ENSG00000144891/ENSG00000135914/ENSG00000109819/ENSG00000121769
GO:0071897	BP	GO:0071897	DNA biosynthetic process	40	0.584121150905726	2.14514588007397	0.00027897893709025	0.00338280535592517	0.00232042237972133	568	tags=80%, list=35%, signal=53%	ENSG00000117724/ENSG00000117650/ENSG00000178999/ENSG00000051341/ENSG00000127586/ENSG00000143476/ENSG00000167900/ENSG00000147536/ENSG00000077264/ENSG00000133119/ENSG00000166803/ENSG00000131153/ENSG00000183814/ENSG00000101868/ENSG00000062822/ENSG00000112562/ENSG00000082482/ENSG00000118523/ENSG00000100479/ENSG00000105486/ENSG00000101003/ENSG00000140451/ENSG00000163918/ENSG00000176890/ENSG00000177084…
GO:0004386	MF	GO:0004386	helicase activity	38	0.584160245149528	2.12595483337986	0.00027972027972028	0.00338280535592517	0.00232042237972133	519	tags=71%, list=32%, signal=49%	ENSG00000186871/ENSG00000136492/ENSG00000051341/ENSG00000197299/ENSG00000085999/ENSG00000127586/ENSG00000119969/ENSG00000125885/ENSG00000138658/ENSG00000160957/ENSG00000100297/ENSG00000133119/ENSG00000138346/ENSG00000187790/ENSG00000051180/ENSG00000140451/ENSG00000112118/ENSG00000163918/ENSG00000073111/ENSG00000166508/ENSG00000116830/ENSG00000145833/ENSG00000104738/ENSG00000013573/ENSG00000111445…
GO:0004712	MF	GO:0004712	protein serine/threonine/tyrosine kinase activity	47	0.541915149068516	2.05667613577511	0.000272368241862999	0.00338280535592517	0.00232042237972133	321	tags=49%, list=20%, signal=40%	ENSG00000117650/ENSG00000112742/ENSG00000170312/ENSG00000156970/ENSG00000178999/ENSG00000168078/ENSG00000169679/ENSG00000127564/ENSG00000142731/ENSG00000087586/ENSG00000122966/ENSG00000166851/ENSG00000077264/ENSG00000154928/ENSG00000165304/ENSG00000065361/ENSG00000177602/ENSG00000163673/ENSG00000120539/ENSG00000123374/ENSG00000097046/ENSG00000060140/ENSG00000152953
GO:0000781	CC	GO:0000781	chromosome, telomeric region	34	0.569599552223097	2.02074420980254	0.000285143997718848	0.00338280535592517	0.00232042237972133	568	tags=79%, list=35%, signal=53%	ENSG00000170312/ENSG00000100206/ENSG00000197299/ENSG00000111247/ENSG00000160957/ENSG00000139618/ENSG00000100297/ENSG00000085840/ENSG00000106462/ENSG00000138346/ENSG00000188486/ENSG00000123374/ENSG00000051180/ENSG00000062822/ENSG00000140451/ENSG00000112118/ENSG00000073111/ENSG00000166508/ENSG00000188827/ENSG00000104738/ENSG00000161036/ENSG00000141499/ENSG00000085224/ENSG00000128708/ENSG00000095002…
GO:0006816	BP	GO:0006816	calcium ion transport	21	-0.649244011827756	-2.39916866440451	0.000293255131964809	0.00342239018904215	0.00234757544441105	318	tags=62%, list=20%, signal=50%	ENSG00000164867/ENSG00000164949/ENSG00000144681/ENSG00000131981/ENSG00000171227/ENSG00000164266/ENSG00000135124/ENSG00000055732/ENSG00000155962/ENSG00000089041/ENSG00000135914/ENSG00000163823/ENSG00000166473
GO:0000077	BP	GO:0000077	DNA damage checkpoint signaling	27	0.620506227293757	2.08834868391511	0.000294074400823408	0.00342239018904215	0.00234757544441105	320	tags=56%, list=20%, signal=45%	ENSG00000170312/ENSG00000075218/ENSG00000154920/ENSG00000136492/ENSG00000197299/ENSG00000092853/ENSG00000012048/ENSG00000144554/ENSG00000143476/ENSG00000166851/ENSG00000101412/ENSG00000092470/ENSG00000188486/ENSG00000123374/ENSG00000149948
GO:1902806	BP	GO:1902806	regulation of cell cycle G1/S phase transition	26	0.624639327464323	2.08685600714075	0.000293987946494194	0.00342239018904215	0.00234757544441105	302	tags=62%, list=19%, signal=51%	ENSG00000118193/ENSG00000171848/ENSG00000075218/ENSG00000101447/ENSG00000154734/ENSG00000094804/ENSG00000101412/ENSG00000156876/ENSG00000123473/ENSG00000106462/ENSG00000123080/ENSG00000080839/ENSG00000172167/ENSG00000151849/ENSG00000123374/ENSG00000167325
GO:1905952	BP	GO:1905952	regulation of lipid localization	22	-0.651245969581846	-2.4465805590009	0.000296471983397569	0.00343174290459659	0.00235399090383016	361	tags=77%, list=22%, signal=61%	ENSG00000091039/ENSG00000185950/ENSG00000185345/ENSG00000064687/ENSG00000108984/ENSG00000135245/ENSG00000073060/ENSG00000135124/ENSG00000132170/ENSG00000025434/ENSG00000135218/ENSG00000144891/ENSG00000147872/ENSG00000118785/ENSG00000137869/ENSG00000089041/ENSG00000121769
GO:0070192	BP	GO:0070192	chromosome organization involved in meiotic cell cycle	21	0.696915566587928	2.20818995535862	0.000303398058252427	0.00343797904956566	0.00235826856359089	355	tags=76%, list=22%, signal=60%	ENSG00000121152/ENSG00000156970/ENSG00000129810/ENSG00000169679/ENSG00000136492/ENSG00000163535/ENSG00000100206/ENSG00000144554/ENSG00000071539/ENSG00000113810/ENSG00000175305/ENSG00000151503/ENSG00000131470/ENSG00000051180/ENSG00000136824/ENSG00000010292
GO:0007062	BP	GO:0007062	sister chromatid cohesion	21	0.682504702561873	2.16252886423653	0.000303398058252427	0.00343797904956566	0.00235826856359089	231	tags=52%, list=14%, signal=45%	ENSG00000171320/ENSG00000156970/ENSG00000129810/ENSG00000135476/ENSG00000169679/ENSG00000117399/ENSG00000163535/ENSG00000166851/ENSG00000079616/ENSG00000146670/ENSG00000177602
GO:0044786	BP	GO:0044786	cell cycle DNA replication	22	0.658203533889569	2.11148491183367	0.000301704631166088	0.00343797904956566	0.00235826856359089	391	tags=77%, list=24%, signal=59%	ENSG00000129173/ENSG00000093009/ENSG00000197299/ENSG00000139618/ENSG00000161692/ENSG00000176208/ENSG00000167513/ENSG00000112029/ENSG00000138346/ENSG00000097046/ENSG00000101868/ENSG00000051180/ENSG00000006634/ENSG00000105486/ENSG00000101003/ENSG00000112118/ENSG00000073111
GO:0044774	BP	GO:0044774	mitotic DNA integrity checkpoint signaling	23	0.628259759884335	2.0391733372876	0.000298908982214916	0.00343797904956566	0.00235826856359089	201	tags=48%, list=12%, signal=42%	ENSG00000170312/ENSG00000075218/ENSG00000154920/ENSG00000197299/ENSG00000092853/ENSG00000012048/ENSG00000144554/ENSG00000143476/ENSG00000166851/ENSG00000094804/ENSG00000085840
GO:0023061	BP	GO:0023061	signal release	27	-0.567084005658592	-2.26350970810231	0.000312402374258044	0.00346345555701229	0.00237574407631371	452	tags=70%, list=28%, signal=52%	ENSG00000072310/ENSG00000075073/ENSG00000124766/ENSG00000123836/ENSG00000185950/ENSG00000175471/ENSG00000185345/ENSG00000164251/ENSG00000108984/ENSG00000155093/ENSG00000136689/ENSG00000164266/ENSG00000166900/ENSG00000135124/ENSG00000132170/ENSG00000144891/ENSG00000118785/ENSG00000137869/ENSG00000089041
GO:0006874	BP	GO:0006874	cellular calcium ion homeostasis	27	-0.561979535412726	-2.24313527002797	0.000312402374258044	0.00346345555701229	0.00237574407631371	148	tags=37%, list=9%, signal=34%	ENSG00000164266/ENSG00000135124/ENSG00000135218/ENSG00000055732/ENSG00000144891/ENSG00000155962/ENSG00000089041/ENSG00000151882/ENSG00000135914/ENSG00000163823
GO:0072503	BP	GO:0072503	cellular divalent inorganic cation homeostasis	27	-0.561979535412726	-2.24313527002797	0.000312402374258044	0.00346345555701229	0.00237574407631371	148	tags=37%, list=9%, signal=34%	ENSG00000164266/ENSG00000135124/ENSG00000135218/ENSG00000055732/ENSG00000144891/ENSG00000155962/ENSG00000089041/ENSG00000151882/ENSG00000135914/ENSG00000163823
GO:0034501	BP	GO:0034501	protein localization to kinetochore	14	0.761760973594215	2.18990957920739	0.000316906987799081	0.00346345555701229	0.00237574407631371	328	tags=86%, list=20%, signal=69%	ENSG00000112742/ENSG00000137812/ENSG00000170312/ENSG00000178999/ENSG00000080986/ENSG00000184445/ENSG00000177602/ENSG00000167513/ENSG00000174442/ENSG00000172167/ENSG00000040275/ENSG00000031691
GO:1903083	BP	GO:1903083	protein localization to condensed chromosome	14	0.761760973594215	2.18990957920739	0.000316906987799081	0.00346345555701229	0.00237574407631371	328	tags=86%, list=20%, signal=69%	ENSG00000112742/ENSG00000137812/ENSG00000170312/ENSG00000178999/ENSG00000080986/ENSG00000184445/ENSG00000177602/ENSG00000167513/ENSG00000174442/ENSG00000172167/ENSG00000040275/ENSG00000031691
GO:0002377	BP	GO:0002377	immunoglobulin production	14	0.749919518196457	2.15586777671788	0.000316906987799081	0.00346345555701229	0.00237574407631371	73	tags=43%, list=5%, signal=41%	ENSG00000211625/ENSG00000243466/ENSG00000240671/ENSG00000211598/ENSG00000174371/ENSG00000051341
GO:0006270	BP	GO:0006270	DNA replication initiation	18	0.69181820877606	2.11497631664458	0.000309262409154167	0.00346345555701229	0.00237574407631371	478	tags=94%, list=30%, signal=67%	ENSG00000065328/ENSG00000093009/ENSG00000198056/ENSG00000094804/ENSG00000100297/ENSG00000085840/ENSG00000175305/ENSG00000167513/ENSG00000091651/ENSG00000014138/ENSG00000123374/ENSG00000101868/ENSG00000112118/ENSG00000073111/ENSG00000166508/ENSG00000104738/ENSG00000161036
GO:0006650	BP	GO:0006650	glycerophospholipid metabolic process	31	-0.53544621600249	-2.20767462553941	0.000324044069993519	0.00350586373214094	0.00240483380164458	534	tags=71%, list=33%, signal=48%	ENSG00000127220/ENSG00000143772/ENSG00000111666/ENSG00000155368/ENSG00000133056/ENSG00000103066/ENSG00000168890/ENSG00000134324/ENSG00000091039/ENSG00000103043/ENSG00000176485/ENSG00000130164/ENSG00000164300/ENSG00000185813/ENSG00000163624/ENSG00000073060/ENSG00000133321/ENSG00000025434/ENSG00000168004/ENSG00000102230/ENSG00000135914/ENSG00000121769
GO:1902751	BP	GO:1902751	positive regulation of cell cycle G2/M phase transition	13	0.726556364355154	2.03949116792732	0.000322476620445018	0.00350586373214094	0.00240483380164458	302	tags=77%, list=19%, signal=63%	ENSG00000170312/ENSG00000158402/ENSG00000143476/ENSG00000161692/ENSG00000176208/ENSG00000134057/ENSG00000112029/ENSG00000164045/ENSG00000097046/ENSG00000167325
GO:0005770	CC	GO:0005770	late endosome	32	-0.532063494662939	-2.213439151463	0.000326797385620915	0.00351797385620915	0.00241314069487444	730	tags=94%, list=45%, signal=52%	ENSG00000138760/ENSG00000154265/ENSG00000170088/ENSG00000197746/ENSG00000165406/ENSG00000149582/ENSG00000101421/ENSG00000123595/ENSG00000100568/ENSG00000005893/ENSG00000149357/ENSG00000197081/ENSG00000134108/ENSG00000188186/ENSG00000185896/ENSG00000006715/ENSG00000040531/ENSG00000119979/ENSG00000141447/ENSG00000189067/ENSG00000103043/ENSG00000130164/ENSG00000225190/ENSG00000161011/ENSG00000030582…
GO:0006875	BP	GO:0006875	cellular metal ion homeostasis	37	-0.533695120689476	-2.30257907491068	0.000345303867403315	0.00369870261949919	0.00253711089796727	148	tags=35%, list=9%, signal=33%	ENSG00000164266/ENSG00000135124/ENSG00000167996/ENSG00000135218/ENSG00000055732/ENSG00000144891/ENSG00000087086/ENSG00000155962/ENSG00000089041/ENSG00000151882/ENSG00000135914/ENSG00000163823/ENSG00000138449
GO:0008202	BP	GO:0008202	steroid metabolic process	38	-0.523662478487993	-2.27175104150044	0.000350631136044881	0.00371876273844645	0.00255087105974056	476	tags=71%, list=29%, signal=51%	ENSG00000132196/ENSG00000157326/ENSG00000069667/ENSG00000072310/ENSG00000107798/ENSG00000141447/ENSG00000177628/ENSG00000104763/ENSG00000067064/ENSG00000164211/ENSG00000130164/ENSG00000125629/ENSG00000110921/ENSG00000172893/ENSG00000052802/ENSG00000167508/ENSG00000073060/ENSG00000160285/ENSG00000119655/ENSG00000141458/ENSG00000186480/ENSG00000112972/ENSG00000144891/ENSG00000118785/ENSG00000169297…
GO:0046486	BP	GO:0046486	glycerolipid metabolic process	38	-0.514951712812883	-2.23396202317735	0.000350631136044881	0.00371876273844645	0.00255087105974056	534	tags=68%, list=33%, signal=47%	ENSG00000127220/ENSG00000143772/ENSG00000111666/ENSG00000155368/ENSG00000072310/ENSG00000133056/ENSG00000103066/ENSG00000168890/ENSG00000134324/ENSG00000214274/ENSG00000091039/ENSG00000103043/ENSG00000176485/ENSG00000130164/ENSG00000125629/ENSG00000164300/ENSG00000185813/ENSG00000163624/ENSG00000073060/ENSG00000186480/ENSG00000133321/ENSG00000025434/ENSG00000168004/ENSG00000102230/ENSG00000135914…
GO:0051338	BP	GO:0051338	regulation of transferase activity	123	0.407668155964326	1.82394799849571	0.000353148911124191	0.0037271059100509	0.00255659402635315	325	tags=37%, list=20%, signal=32%	ENSG00000138778/ENSG00000117650/ENSG00000118193/ENSG00000156970/ENSG00000178999/ENSG00000117399/ENSG00000175063/ENSG00000158402/ENSG00000197299/ENSG00000127564/ENSG00000088325/ENSG00000127586/ENSG00000092853/ENSG00000145386/ENSG00000157456/ENSG00000166851/ENSG00000147536/ENSG00000164109/ENSG00000100526/ENSG00000094804/ENSG00000162063/ENSG00000146918/ENSG00000161692/ENSG00000154928/ENSG00000133119…
GO:0006869	BP	GO:0006869	lipid transport	42	-0.518469878225019	-2.30794946845531	0.000363372093023256	0.0038162932501418	0.0026177717407529	388	tags=60%, list=24%, signal=46%	ENSG00000141447/ENSG00000091039/ENSG00000164211/ENSG00000185950/ENSG00000130164/ENSG00000185345/ENSG00000064687/ENSG00000196743/ENSG00000113163/ENSG00000100336/ENSG00000108984/ENSG00000073060/ENSG00000119655/ENSG00000143554/ENSG00000141458/ENSG00000135124/ENSG00000132170/ENSG00000025434/ENSG00000135218/ENSG00000144891/ENSG00000147872/ENSG00000118785/ENSG00000137869/ENSG00000089041/ENSG00000121769
GO:0006873	BP	GO:0006873	cellular ion homeostasis	45	-0.517820983495461	-2.35177806379381	0.000371609067261241	0.00386509334209397	0.00265124597695155	211	tags=40%, list=13%, signal=36%	ENSG00000030582/ENSG00000156869/ENSG00000139832/ENSG00000164266/ENSG00000135124/ENSG00000175538/ENSG00000167996/ENSG00000178301/ENSG00000135218/ENSG00000055732/ENSG00000144891/ENSG00000087086/ENSG00000155962/ENSG00000089041/ENSG00000151882/ENSG00000135914/ENSG00000163823/ENSG00000138449
GO:0006644	BP	GO:0006644	phospholipid metabolic process	45	-0.50952367117022	-2.31409431258075	0.000371609067261241	0.00386509334209397	0.00265124597695155	548	tags=69%, list=34%, signal=47%	ENSG00000049860/ENSG00000127220/ENSG00000187446/ENSG00000143772/ENSG00000111666/ENSG00000155368/ENSG00000133056/ENSG00000103066/ENSG00000168890/ENSG00000134324/ENSG00000067064/ENSG00000091039/ENSG00000103043/ENSG00000138413/ENSG00000176485/ENSG00000130164/ENSG00000110921/ENSG00000164300/ENSG00000167468/ENSG00000185813/ENSG00000163624/ENSG00000167508/ENSG00000073060/ENSG00000112972/ENSG00000133321…
GO:0010876	BP	GO:0010876	lipid localization	51	-0.498506920481851	-2.33660922177844	0.000388953714507974	0.00402604493911378	0.00276165010857635	388	tags=57%, list=24%, signal=45%	ENSG00000141447/ENSG00000177628/ENSG00000091039/ENSG00000164211/ENSG00000011638/ENSG00000185950/ENSG00000130164/ENSG00000185345/ENSG00000064687/ENSG00000196743/ENSG00000113163/ENSG00000100336/ENSG00000108984/ENSG00000135245/ENSG00000163624/ENSG00000073060/ENSG00000119655/ENSG00000143554/ENSG00000141458/ENSG00000135124/ENSG00000132170/ENSG00000025434/ENSG00000135218/ENSG00000144891/ENSG00000147872…
GO:0098771	BP	GO:0098771	inorganic ion homeostasis	53	-0.463072901825586	-2.19731838321891	0.000394321766561514	0.00404273696860448	0.00277309994228473	211	tags=38%, list=13%, signal=34%	ENSG00000030582/ENSG00000156869/ENSG00000139832/ENSG00000169418/ENSG00000164266/ENSG00000135124/ENSG00000086300/ENSG00000175538/ENSG00000167996/ENSG00000178301/ENSG00000135218/ENSG00000055732/ENSG00000144891/ENSG00000087086/ENSG00000155962/ENSG00000089041/ENSG00000151882/ENSG00000135914/ENSG00000163823/ENSG00000138449
GO:0055080	BP	GO:0055080	cation homeostasis	53	-0.443333033479275	-2.10365111089813	0.000394321766561514	0.00404273696860448	0.00277309994228473	211	tags=36%, list=13%, signal=32%	ENSG00000030582/ENSG00000156869/ENSG00000139832/ENSG00000169418/ENSG00000164266/ENSG00000135124/ENSG00000086300/ENSG00000167996/ENSG00000178301/ENSG00000135218/ENSG00000055732/ENSG00000144891/ENSG00000087086/ENSG00000155962/ENSG00000089041/ENSG00000151882/ENSG00000135914/ENSG00000163823/ENSG00000138449
GO:0050801	BP	GO:0050801	ion homeostasis	55	-0.450599364152822	-2.1589208212308	0.000398883127243718	0.00405092157054587	0.00277871413864417	211	tags=36%, list=13%, signal=33%	ENSG00000030582/ENSG00000156869/ENSG00000139832/ENSG00000169418/ENSG00000164266/ENSG00000135124/ENSG00000086300/ENSG00000175538/ENSG00000167996/ENSG00000178301/ENSG00000135218/ENSG00000055732/ENSG00000144891/ENSG00000087086/ENSG00000155962/ENSG00000089041/ENSG00000151882/ENSG00000135914/ENSG00000163823/ENSG00000138449
GO:0030001	BP	GO:0030001	metal ion transport	54	-0.427048684034158	-2.03168011524291	0.000397614314115308	0.00405092157054587	0.00277871413864417	289	tags=39%, list=18%, signal=33%	ENSG00000164949/ENSG00000144681/ENSG00000123700/ENSG00000139974/ENSG00000131981/ENSG00000148175/ENSG00000171227/ENSG00000164266/ENSG00000135124/ENSG00000136531/ENSG00000175538/ENSG00000167996/ENSG00000055732/ENSG00000087086/ENSG00000072041/ENSG00000155962/ENSG00000089041/ENSG00000135914/ENSG00000163823/ENSG00000138449/ENSG00000166473
GO:0055082	BP	GO:0055082	cellular chemical homeostasis	57	-0.471905005160047	-2.27746504270119	0.000409668168783286	0.00410239798786239	0.00281402418997772	221	tags=35%, list=14%, signal=31%	ENSG00000155093/ENSG00000030582/ENSG00000156869/ENSG00000139832/ENSG00000164266/ENSG00000135124/ENSG00000175538/ENSG00000167996/ENSG00000178301/ENSG00000135218/ENSG00000055732/ENSG00000144891/ENSG00000087086/ENSG00000155962/ENSG00000089041/ENSG00000151882/ENSG00000135914/ENSG00000109819/ENSG00000163823/ENSG00000138449
GO:0032940	BP	GO:0032940	secretion by cell	57	-0.454639484312402	-2.19413975531374	0.000409668168783286	0.00410239798786239	0.00281402418997772	431	tags=58%, list=27%, signal=44%	ENSG00000185896/ENSG00000072310/ENSG00000075073/ENSG00000124766/ENSG00000123836/ENSG00000214274/ENSG00000154309/ENSG00000185950/ENSG00000175471/ENSG00000185345/ENSG00000164251/ENSG00000129158/ENSG00000108984/ENSG00000168461/ENSG00000137501/ENSG00000167994/ENSG00000137575/ENSG00000155093/ENSG00000136689/ENSG00000164266/ENSG00000166900/ENSG00000135124/ENSG00000132170/ENSG00000119699/ENSG00000119508…
GO:0005975	BP	GO:0005975	carbohydrate metabolic process	57	-0.429073063732295	-2.07075342013714	0.000409668168783286	0.00410239798786239	0.00281402418997772	581	tags=70%, list=36%, signal=47%	ENSG00000006282/ENSG00000064225/ENSG00000118804/ENSG00000176046/ENSG00000049860/ENSG00000130313/ENSG00000170266/ENSG00000176928/ENSG00000079739/ENSG00000069667/ENSG00000163521/ENSG00000110013/ENSG00000123836/ENSG00000204386/ENSG00000150907/ENSG00000197093/ENSG00000213614/ENSG00000138413/ENSG00000185950/ENSG00000059804/ENSG00000185345/ENSG00000111674/ENSG00000196743/ENSG00000175264/ENSG00000064886…
GO:0140352	BP	GO:0140352	export from cell	61	-0.465107088191428	-2.27612802508148	0.000417885499373172	0.00416053118755821	0.00285390043569275	431	tags=54%, list=27%, signal=41%	ENSG00000075073/ENSG00000124766/ENSG00000123836/ENSG00000214274/ENSG00000154309/ENSG00000185950/ENSG00000175471/ENSG00000185345/ENSG00000164251/ENSG00000129158/ENSG00000108984/ENSG00000168461/ENSG00000137501/ENSG00000167994/ENSG00000137575/ENSG00000155093/ENSG00000136689/ENSG00000164266/ENSG00000166900/ENSG00000135124/ENSG00000132170/ENSG00000119699/ENSG00000175538/ENSG00000119508/ENSG00000025434…
GO:0032787	BP	GO:0032787	monocarboxylic acid metabolic process	64	-0.442545894677211	-2.18413453349786	0.000429000429000429	0.00416053118755821	0.00285390043569275	566	tags=73%, list=35%, signal=50%	ENSG00000115425/ENSG00000081760/ENSG00000121064/ENSG00000176046/ENSG00000278540/ENSG00000104823/ENSG00000120437/ENSG00000130005/ENSG00000155368/ENSG00000130821/ENSG00000197894/ENSG00000134463/ENSG00000079739/ENSG00000072310/ENSG00000103066/ENSG00000134324/ENSG00000123836/ENSG00000141447/ENSG00000104763/ENSG00000138413/ENSG00000164211/ENSG00000185950/ENSG00000131069/ENSG00000143819/ENSG00000125629…
GO:0006914	BP	GO:0006914	autophagy	63	-0.440065481446557	-2.16106968903433	0.000428816466552316	0.00416053118755821	0.00285390043569275	840	tags=90%, list=52%, signal=45%	ENSG00000114867/ENSG00000148572/ENSG00000160695/ENSG00000126775/ENSG00000070770/ENSG00000085733/ENSG00000162627/ENSG00000155097/ENSG00000104946/ENSG00000149823/ENSG00000131943/ENSG00000178996/ENSG00000078902/ENSG00000155876/ENSG00000104765/ENSG00000197746/ENSG00000198911/ENSG00000114573/ENSG00000101421/ENSG00000100568/ENSG00000005893/ENSG00000165861/ENSG00000179364/ENSG00000077585/ENSG00000118804…
GO:0061919	BP	GO:0061919	process utilizing autophagic mechanism	63	-0.440065481446557	-2.16106968903433	0.000428816466552316	0.00416053118755821	0.00285390043569275	840	tags=90%, list=52%, signal=45%	ENSG00000114867/ENSG00000148572/ENSG00000160695/ENSG00000126775/ENSG00000070770/ENSG00000085733/ENSG00000162627/ENSG00000155097/ENSG00000104946/ENSG00000149823/ENSG00000131943/ENSG00000178996/ENSG00000078902/ENSG00000155876/ENSG00000104765/ENSG00000197746/ENSG00000198911/ENSG00000114573/ENSG00000101421/ENSG00000100568/ENSG00000005893/ENSG00000165861/ENSG00000179364/ENSG00000077585/ENSG00000118804…
GO:0022857	MF	GO:0022857	transmembrane transporter activity	62	-0.430832211874846	-2.1069235635945	0.000426257459505541	0.00416053118755821	0.00285390043569275	337	tags=42%, list=21%, signal=35%	ENSG00000092068/ENSG00000169100/ENSG00000119899/ENSG00000059804/ENSG00000064687/ENSG00000164300/ENSG00000123700/ENSG00000139974/ENSG00000174899/ENSG00000155465/ENSG00000147416/ENSG00000171227/ENSG00000135124/ENSG00000166347/ENSG00000136531/ENSG00000175538/ENSG00000173930/ENSG00000178301/ENSG00000135218/ENSG00000055732/ENSG00000072041/ENSG00000155962/ENSG00000089041/ENSG00000138449/ENSG00000166473…
GO:1901615	BP	GO:1901615	organic hydroxy compound metabolic process	62	-0.421744810712978	-2.06248292263951	0.000426257459505541	0.00416053118755821	0.00285390043569275	507	tags=63%, list=31%, signal=45%	ENSG00000116133/ENSG00000173598/ENSG00000197894/ENSG00000176928/ENSG00000132196/ENSG00000157326/ENSG00000072310/ENSG00000166228/ENSG00000100979/ENSG00000116016/ENSG00000040531/ENSG00000107798/ENSG00000123836/ENSG00000141447/ENSG00000177628/ENSG00000104763/ENSG00000067064/ENSG00000138413/ENSG00000164211/ENSG00000130164/ENSG00000131069/ENSG00000185345/ENSG00000125629/ENSG00000110921/ENSG00000166816…
GO:0042770	BP	GO:0042770	signal transduction in response to DNA damage	35	0.55252961057735	1.97296940205175	0.000425350914504466	0.00416053118755821	0.00285390043569275	320	tags=49%, list=20%, signal=40%	ENSG00000170312/ENSG00000075218/ENSG00000154920/ENSG00000136492/ENSG00000197299/ENSG00000092853/ENSG00000012048/ENSG00000144554/ENSG00000143476/ENSG00000166851/ENSG00000139618/ENSG00000176208/ENSG00000101412/ENSG00000092470/ENSG00000188486/ENSG00000123374/ENSG00000149948
GO:0005765	CC	GO:0005765	lysosomal membrane	67	-0.425287848691645	-2.11783052359045	0.000443066016836509	0.00423964948555113	0.00290817132922396	713	tags=81%, list=44%, signal=47%	ENSG00000155876/ENSG00000138760/ENSG00000154265/ENSG00000217128/ENSG00000109323/ENSG00000170088/ENSG00000197746/ENSG00000221983/ENSG00000165406/ENSG00000114573/ENSG00000101421/ENSG00000100568/ENSG00000005893/ENSG00000149357/ENSG00000077585/ENSG00000103249/ENSG00000134108/ENSG00000188186/ENSG00000171130/ENSG00000127955/ENSG00000129925/ENSG00000185896/ENSG00000116786/ENSG00000006715/ENSG00000156508…
GO:0098852	CC	GO:0098852	lytic vacuole membrane	67	-0.425287848691645	-2.11783052359045	0.000443066016836509	0.00423964948555113	0.00290817132922396	713	tags=81%, list=44%, signal=47%	ENSG00000155876/ENSG00000138760/ENSG00000154265/ENSG00000217128/ENSG00000109323/ENSG00000170088/ENSG00000197746/ENSG00000221983/ENSG00000165406/ENSG00000114573/ENSG00000101421/ENSG00000100568/ENSG00000005893/ENSG00000149357/ENSG00000077585/ENSG00000103249/ENSG00000134108/ENSG00000188186/ENSG00000171130/ENSG00000127955/ENSG00000129925/ENSG00000185896/ENSG00000116786/ENSG00000006715/ENSG00000156508…
GO:0019725	BP	GO:0019725	cellular homeostasis	67	-0.39361052577818	-1.96008512461384	0.000443066016836509	0.00423964948555113	0.00290817132922396	221	tags=30%, list=14%, signal=27%	ENSG00000155093/ENSG00000030582/ENSG00000156869/ENSG00000139832/ENSG00000164266/ENSG00000135124/ENSG00000175538/ENSG00000167996/ENSG00000178301/ENSG00000135218/ENSG00000055732/ENSG00000144891/ENSG00000087086/ENSG00000155962/ENSG00000089041/ENSG00000151882/ENSG00000135914/ENSG00000109819/ENSG00000163823/ENSG00000138449
GO:0046903	BP	GO:0046903	secretion	68	-0.384377599026408	-1.91937452947811	0.000445831475702185	0.00424723525303895	0.00291337475738316	452	tags=51%, list=28%, signal=39%	ENSG00000072310/ENSG00000118515/ENSG00000075073/ENSG00000124766/ENSG00000123836/ENSG00000214274/ENSG00000154309/ENSG00000185950/ENSG00000175471/ENSG00000185345/ENSG00000164251/ENSG00000129158/ENSG00000108984/ENSG00000168461/ENSG00000137501/ENSG00000167994/ENSG00000137575/ENSG00000155093/ENSG00000136689/ENSG00000169418/ENSG00000164266/ENSG00000166900/ENSG00000135124/ENSG00000086300/ENSG00000132170…
GO:0090329	BP	GO:0090329	regulation of DNA-templated DNA replication	21	0.660607000204872	2.09314558639284	0.000455097087378641	0.00431640541465292	0.00296082176486081	389	tags=76%, list=24%, signal=59%	ENSG00000129173/ENSG00000197299/ENSG00000127586/ENSG00000147536/ENSG00000139618/ENSG00000161692/ENSG00000133119/ENSG00000111602/ENSG00000167513/ENSG00000131153/ENSG00000112029/ENSG00000123374/ENSG00000097046/ENSG00000006634/ENSG00000101003/ENSG00000163918
GO:0005774	CC	GO:0005774	vacuolar membrane	74	-0.427286508694394	-2.16856067363509	0.000463177396943029	0.00432600343990613	0.00296740549352839	713	tags=77%, list=44%, signal=45%	ENSG00000154265/ENSG00000217128/ENSG00000109323/ENSG00000170088/ENSG00000197746/ENSG00000221983/ENSG00000165406/ENSG00000114573/ENSG00000101421/ENSG00000100568/ENSG00000005893/ENSG00000149357/ENSG00000077585/ENSG00000103249/ENSG00000136710/ENSG00000134108/ENSG00000188186/ENSG00000171130/ENSG00000127955/ENSG00000129925/ENSG00000185896/ENSG00000128524/ENSG00000116786/ENSG00000006715/ENSG00000156508…
GO:0051383	BP	GO:0051383	kinetochore organization	17	0.692691722137851	2.08839181284427	0.000468164794007491	0.00432600343990613	0.00296740549352839	269	tags=65%, list=17%, signal=54%	ENSG00000138778/ENSG00000117724/ENSG00000143228/ENSG00000126787/ENSG00000080986/ENSG00000115163/ENSG00000123219/ENSG00000184445/ENSG00000113810/ENSG00000167513/ENSG00000166451
GO:0007131	BP	GO:0007131	reciprocal meiotic recombination	17	0.691883788569765	2.08595597913211	0.000468164794007491	0.00432600343990613	0.00296740549352839	310	tags=71%, list=19%, signal=58%	ENSG00000131747/ENSG00000154920/ENSG00000136492/ENSG00000100206/ENSG00000085999/ENSG00000111247/ENSG00000144554/ENSG00000121211/ENSG00000071539/ENSG00000131470/ENSG00000187790/ENSG00000051180
GO:0140527	BP	GO:0140527	reciprocal homologous recombination	17	0.691883788569765	2.08595597913211	0.000468164794007491	0.00432600343990613	0.00296740549352839	310	tags=71%, list=19%, signal=58%	ENSG00000131747/ENSG00000154920/ENSG00000136492/ENSG00000100206/ENSG00000085999/ENSG00000111247/ENSG00000144554/ENSG00000121211/ENSG00000071539/ENSG00000131470/ENSG00000187790/ENSG00000051180
GO:0035825	BP	GO:0035825	homologous recombination	18	0.678968787485516	2.075694000326	0.000463893613731251	0.00432600343990613	0.00296740549352839	310	tags=67%, list=19%, signal=54%	ENSG00000131747/ENSG00000154920/ENSG00000136492/ENSG00000100206/ENSG00000085999/ENSG00000111247/ENSG00000144554/ENSG00000121211/ENSG00000071539/ENSG00000131470/ENSG00000187790/ENSG00000051180
GO:0045143	BP	GO:0045143	homologous chromosome segregation	17	0.682119620882742	2.0565180528438	0.000468164794007491	0.00432600343990613	0.00296740549352839	230	tags=59%, list=14%, signal=51%	ENSG00000129810/ENSG00000135476/ENSG00000136492/ENSG00000163535/ENSG00000100206/ENSG00000144554/ENSG00000166851/ENSG00000071539/ENSG00000164611/ENSG00000175305
GO:0005215	MF	GO:0005215	transporter activity	76	-0.447389307630194	-2.2862710864319	0.00047192071731949	0.00434207395037976	0.00297842899864708	424	tags=53%, list=26%, signal=41%	ENSG00000174327/ENSG00000100979/ENSG00000040531/ENSG00000011021/ENSG00000141447/ENSG00000154309/ENSG00000091039/ENSG00000164211/ENSG00000092068/ENSG00000169100/ENSG00000119899/ENSG00000059804/ENSG00000064687/ENSG00000164300/ENSG00000196743/ENSG00000113163/ENSG00000123700/ENSG00000139974/ENSG00000174899/ENSG00000155465/ENSG00000147416/ENSG00000073060/ENSG00000119655/ENSG00000171227/ENSG00000143554…
GO:0006812	BP	GO:0006812	cation transport	79	-0.374069286078045	-1.9324727406618	0.000481927710843373	0.00441527813381184	0.0030286431279429	337	tags=38%, list=21%, signal=32%	ENSG00000092068/ENSG00000119899/ENSG00000164867/ENSG00000185345/ENSG00000164949/ENSG00000144681/ENSG00000205542/ENSG00000164300/ENSG00000123700/ENSG00000139974/ENSG00000174899/ENSG00000131981/ENSG00000147416/ENSG00000148175/ENSG00000171227/ENSG00000164266/ENSG00000135124/ENSG00000166347/ENSG00000136531/ENSG00000175538/ENSG00000167996/ENSG00000055732/ENSG00000087086/ENSG00000072041/ENSG00000155962…
GO:0097431	CC	GO:0097431	mitotic spindle pole	12	0.742382688684213	2.03957572266113	0.000489077274209325	0.00446179394649439	0.00306055047152401	149	tags=58%, list=9%, signal=53%	ENSG00000066279/ENSG00000178999/ENSG00000138182/ENSG00000076382/ENSG00000101447/ENSG00000087586/ENSG00000166851
GO:0032506	BP	GO:0032506	cytokinetic process	10	0.797096170927056	2.0931456318305	0.000497760079641613	0.00452184578678647	0.00310174280140876	213	tags=70%, list=13%, signal=61%	ENSG00000178999/ENSG00000138182/ENSG00000011426/ENSG00000138180/ENSG00000112984/ENSG00000161800/ENSG00000114346
GO:0008610	BP	GO:0008610	lipid biosynthetic process	82	-0.451976348196319	-2.34668270529866	0.0005005005005005	0.00452763688057806	0.00310571518001859	566	tags=68%, list=35%, signal=47%	ENSG00000115425/ENSG00000175826/ENSG00000049860/ENSG00000278540/ENSG00000127220/ENSG00000187446/ENSG00000143772/ENSG00000111666/ENSG00000116133/ENSG00000132196/ENSG00000135446/ENSG00000072310/ENSG00000133056/ENSG00000103066/ENSG00000133424/ENSG00000168890/ENSG00000134324/ENSG00000214274/ENSG00000197093/ENSG00000141447/ENSG00000177628/ENSG00000104763/ENSG00000067064/ENSG00000103043/ENSG00000138413…
GO:0019953	BP	GO:0019953	sexual reproduction	79	0.457512860957529	1.91173154466287	0.00050460451621042	0.0045456632778286	0.00311808031818198	303	tags=42%, list=19%, signal=36%	ENSG00000066279/ENSG00000131747/ENSG00000121621/ENSG00000112742/ENSG00000137812/ENSG00000170312/ENSG00000121152/ENSG00000136492/ENSG00000080986/ENSG00000185697/ENSG00000158402/ENSG00000100206/ENSG00000187741/ENSG00000105011/ENSG00000087586/ENSG00000144554/ENSG00000157456/ENSG00000125885/ENSG00000166851/ENSG00000154734/ENSG00000139618/ENSG00000071539/ENSG00000161800/ENSG00000164611/ENSG00000138587…
GO:0008289	MF	GO:0008289	lipid binding	88	-0.389370098961357	-2.05147621511441	0.0005175983436853	0.00464328847481021	0.00318504594820384	263	tags=33%, list=16%, signal=29%	ENSG00000140948/ENSG00000113163/ENSG00000100336/ENSG00000123700/ENSG00000137501/ENSG00000137575/ENSG00000169083/ENSG00000073060/ENSG00000119655/ENSG00000166340/ENSG00000118473/ENSG00000141458/ENSG00000186480/ENSG00000166900/ENSG00000086300/ENSG00000132170/ENSG00000025434/ENSG00000118960/ENSG00000158473/ENSG00000135218/ENSG00000055732/ENSG00000089041/ENSG00000196549/ENSG00000102445/ENSG00000102230…
GO:0019752	BP	GO:0019752	carboxylic acid metabolic process	92	-0.448601841722362	-2.39366440371479	0.000523286237571952	0.00467483514312204	0.00320668526452696	573	tags=71%, list=36%, signal=48%	ENSG00000177000/ENSG00000115425/ENSG00000081760/ENSG00000121064/ENSG00000176046/ENSG00000278540/ENSG00000104823/ENSG00000120437/ENSG00000130005/ENSG00000155368/ENSG00000130821/ENSG00000197894/ENSG00000134463/ENSG00000079739/ENSG00000072310/ENSG00000103066/ENSG00000166228/ENSG00000040531/ENSG00000134324/ENSG00000123836/ENSG00000141447/ENSG00000104763/ENSG00000138413/ENSG00000164211/ENSG00000185950…
GO:0001659	BP	GO:0001659	temperature homeostasis	13	-0.658193326795578	-2.1106616903823	0.000526315789473684	0.00468247063940844	0.00321192280396511	418	tags=85%, list=26%, signal=63%	ENSG00000116016/ENSG00000134324/ENSG00000150907/ENSG00000155846/ENSG00000161011/ENSG00000137265/ENSG00000108984/ENSG00000025434/ENSG00000135218/ENSG00000109819/ENSG00000099194
GO:0043436	BP	GO:0043436	oxoacid metabolic process	93	-0.444037247035786	-2.37402316159996	0.000529941706412295	0.00469532713541428	0.00322074166816742	573	tags=70%, list=36%, signal=48%	ENSG00000177000/ENSG00000115425/ENSG00000081760/ENSG00000121064/ENSG00000176046/ENSG00000278540/ENSG00000104823/ENSG00000120437/ENSG00000130005/ENSG00000155368/ENSG00000130821/ENSG00000197894/ENSG00000134463/ENSG00000079739/ENSG00000072310/ENSG00000103066/ENSG00000166228/ENSG00000040531/ENSG00000134324/ENSG00000123836/ENSG00000141447/ENSG00000104763/ENSG00000138413/ENSG00000164211/ENSG00000185950…
GO:0006082	BP	GO:0006082	organic acid metabolic process	94	-0.43803469946257	-2.34280862662828	0.000536480686695279	0.00470411899913477	0.00322677241341877	573	tags=69%, list=36%, signal=47%	ENSG00000177000/ENSG00000115425/ENSG00000081760/ENSG00000121064/ENSG00000176046/ENSG00000278540/ENSG00000104823/ENSG00000120437/ENSG00000130005/ENSG00000155368/ENSG00000130821/ENSG00000197894/ENSG00000134463/ENSG00000079739/ENSG00000072310/ENSG00000103066/ENSG00000166228/ENSG00000040531/ENSG00000134324/ENSG00000123836/ENSG00000141447/ENSG00000104763/ENSG00000138413/ENSG00000164211/ENSG00000185950…
GO:0007586	BP	GO:0007586	digestion	14	-0.637539537780272	-2.0790122680857	0.000541858574911948	0.00470411899913477	0.00322677241341877	180	tags=50%, list=11%, signal=45%	ENSG00000073060/ENSG00000164266/ENSG00000086300/ENSG00000025434/ENSG00000135218/ENSG00000140297/ENSG00000109819
GO:0006811	BP	GO:0006811	ion transport	97	-0.38399695173057	-2.06446200302977	0.000541418516513265	0.00470411899913477	0.00322677241341877	337	tags=40%, list=21%, signal=34%	ENSG00000092068/ENSG00000169100/ENSG00000119899/ENSG00000164867/ENSG00000059804/ENSG00000185345/ENSG00000164949/ENSG00000144681/ENSG00000205542/ENSG00000164300/ENSG00000113163/ENSG00000108984/ENSG00000123700/ENSG00000139974/ENSG00000174899/ENSG00000155465/ENSG00000170379/ENSG00000131981/ENSG00000147416/ENSG00000148175/ENSG00000171227/ENSG00000164266/ENSG00000135124/ENSG00000166347/ENSG00000136531…
GO:0055085	BP	GO:0055085	transmembrane transport	96	-0.379424190597994	-2.03287812853292	0.000540248514316586	0.00470411899913477	0.00322677241341877	340	tags=38%, list=21%, signal=31%	ENSG00000185950/ENSG00000092068/ENSG00000169100/ENSG00000119899/ENSG00000059804/ENSG00000164949/ENSG00000064687/ENSG00000144681/ENSG00000205542/ENSG00000119729/ENSG00000123700/ENSG00000139974/ENSG00000174899/ENSG00000155465/ENSG00000170379/ENSG00000147416/ENSG00000148175/ENSG00000073060/ENSG00000171227/ENSG00000135124/ENSG00000166347/ENSG00000136531/ENSG00000175538/ENSG00000119508/ENSG00000173930…
GO:0031226	CC	GO:0031226	intrinsic component of plasma membrane	100	-0.368528711732652	-1.99752696358202	0.000541418516513265	0.00470411899913477	0.00322677241341877	250	tags=36%, list=15%, signal=32%	ENSG00000123700/ENSG00000139974/ENSG00000155465/ENSG00000137575/ENSG00000008277/ENSG00000155093/ENSG00000182612/ENSG00000124785/ENSG00000148175/ENSG00000076716/ENSG00000115525/ENSG00000073060/ENSG00000136732/ENSG00000137507/ENSG00000141458/ENSG00000134824/ENSG00000135124/ENSG00000136531/ENSG00000184916/ENSG00000102996/ENSG00000110203/ENSG00000133083/ENSG00000173930/ENSG00000158473/ENSG00000135218…
GO:0106310	MF	GO:0106310	protein serine kinase activity	43	0.527820971468903	1.96749445890588	0.000550736610216164	0.00476199165379679	0.0032664699392656	321	tags=47%, list=20%, signal=38%	ENSG00000117650/ENSG00000112742/ENSG00000170312/ENSG00000156970/ENSG00000178999/ENSG00000168078/ENSG00000169679/ENSG00000127564/ENSG00000142731/ENSG00000087586/ENSG00000122966/ENSG00000166851/ENSG00000077264/ENSG00000165304/ENSG00000177602/ENSG00000163673/ENSG00000120539/ENSG00000123374/ENSG00000097046/ENSG00000152953
GO:0019915	BP	GO:0019915	lipid storage	17	-0.610927062231561	-2.12133574440014	0.000556483027267668	0.00479243183082916	0.00328735026213279	377	tags=71%, list=23%, signal=55%	ENSG00000177628/ENSG00000091039/ENSG00000164211/ENSG00000011638/ENSG00000196743/ENSG00000135245/ENSG00000163624/ENSG00000073060/ENSG00000132170/ENSG00000025434/ENSG00000135218/ENSG00000147872
GO:0000079	BP	GO:0000079	regulation of cyclin-dependent protein serine/threonine kinase activity	24	0.614030321813381	2.01058447241736	0.000595415302173266	0.00508702041896445	0.00348942217606137	283	tags=58%, list=18%, signal=49%	ENSG00000158402/ENSG00000197299/ENSG00000127564/ENSG00000145386/ENSG00000157456/ENSG00000166851/ENSG00000100526/ENSG00000094804/ENSG00000162063/ENSG00000175305/ENSG00000134057/ENSG00000123080/ENSG00000134222/ENSG00000164045
GO:1904029	BP	GO:1904029	regulation of cyclin-dependent protein kinase activity	24	0.614030321813381	2.01058447241736	0.000595415302173266	0.00508702041896445	0.00348942217606137	283	tags=58%, list=18%, signal=49%	ENSG00000158402/ENSG00000197299/ENSG00000127564/ENSG00000145386/ENSG00000157456/ENSG00000166851/ENSG00000100526/ENSG00000094804/ENSG00000162063/ENSG00000175305/ENSG00000134057/ENSG00000123080/ENSG00000134222/ENSG00000164045
GO:0008203	BP	GO:0008203	cholesterol metabolic process	24	-0.538468696610464	-2.07193173745925	0.000609013398294762	0.00512189783800244	0.00351334620809026	507	tags=75%, list=31%, signal=52%	ENSG00000116133/ENSG00000132196/ENSG00000072310/ENSG00000141447/ENSG00000177628/ENSG00000067064/ENSG00000130164/ENSG00000125629/ENSG00000110921/ENSG00000172893/ENSG00000052802/ENSG00000167508/ENSG00000073060/ENSG00000160285/ENSG00000119655/ENSG00000141458/ENSG00000186480/ENSG00000112972
GO:1903532	BP	GO:1903532	positive regulation of secretion by cell	24	-0.528009662227651	-2.03168723407894	0.000609013398294762	0.00512189783800244	0.00351334620809026	470	tags=71%, list=29%, signal=51%	ENSG00000185896/ENSG00000075073/ENSG00000124766/ENSG00000123836/ENSG00000214274/ENSG00000185950/ENSG00000164251/ENSG00000108984/ENSG00000137575/ENSG00000164266/ENSG00000135124/ENSG00000132170/ENSG00000119699/ENSG00000101605/ENSG00000118785/ENSG00000137869/ENSG00000089041
GO:0031109	BP	GO:0031109	microtubule polymerization or depolymerization	21	0.636952946714853	2.01819727726566	0.000606796116504854	0.00512189783800244	0.00351334620809026	403	tags=71%, list=25%, signal=54%	ENSG00000186185/ENSG00000121621/ENSG00000154839/ENSG00000142945/ENSG00000088325/ENSG00000165480/ENSG00000186638/ENSG00000136108/ENSG00000134222/ENSG00000112029/ENSG00000117632/ENSG00000151849/ENSG00000127914/ENSG00000176771/ENSG00000204899
GO:0044773	BP	GO:0044773	mitotic DNA damage checkpoint signaling	21	0.631373019442742	2.00051717375724	0.000606796116504854	0.00512189783800244	0.00351334620809026	149	tags=43%, list=9%, signal=39%	ENSG00000170312/ENSG00000075218/ENSG00000154920/ENSG00000197299/ENSG00000092853/ENSG00000012048/ENSG00000144554/ENSG00000143476/ENSG00000166851
GO:0044255	BP	GO:0044255	cellular lipid metabolic process	117	-0.428569534558905	-2.38294079245178	0.000631313131313131	0.00516170794274892	0.00354065379699158	569	tags=65%, list=35%, signal=45%	ENSG00000064225/ENSG00000115425/ENSG00000175826/ENSG00000081760/ENSG00000121064/ENSG00000049860/ENSG00000068903/ENSG00000278540/ENSG00000104823/ENSG00000127220/ENSG00000120437/ENSG00000187446/ENSG00000143772/ENSG00000111666/ENSG00000155368/ENSG00000170266/ENSG00000197894/ENSG00000134463/ENSG00000157326/ENSG00000072310/ENSG00000133056/ENSG00000103066/ENSG00000133424/ENSG00000168890/ENSG00000134324…
GO:0000323	CC	GO:0000323	lytic vacuole	116	-0.426093744974198	-2.36690917768485	0.0006265664160401	0.00516170794274892	0.00354065379699158	645	tags=76%, list=40%, signal=49%	ENSG00000154265/ENSG00000051620/ENSG00000217128/ENSG00000109323/ENSG00000170088/ENSG00000197746/ENSG00000221983/ENSG00000165406/ENSG00000105612/ENSG00000114573/ENSG00000149582/ENSG00000101421/ENSG00000123595/ENSG00000100568/ENSG00000005893/ENSG00000149357/ENSG00000077585/ENSG00000103249/ENSG00000135677/ENSG00000136710/ENSG00000143162/ENSG00000185339/ENSG00000049860/ENSG00000134108/ENSG00000188186…
GO:0005764	CC	GO:0005764	lysosome	116	-0.426093744974198	-2.36690917768485	0.0006265664160401	0.00516170794274892	0.00354065379699158	645	tags=76%, list=40%, signal=49%	ENSG00000154265/ENSG00000051620/ENSG00000217128/ENSG00000109323/ENSG00000170088/ENSG00000197746/ENSG00000221983/ENSG00000165406/ENSG00000105612/ENSG00000114573/ENSG00000149582/ENSG00000101421/ENSG00000123595/ENSG00000100568/ENSG00000005893/ENSG00000149357/ENSG00000077585/ENSG00000103249/ENSG00000135677/ENSG00000136710/ENSG00000143162/ENSG00000185339/ENSG00000049860/ENSG00000134108/ENSG00000188186…
GO:0055074	BP	GO:0055074	calcium ion homeostasis	28	-0.577878555393391	-2.32491894672188	0.000631911532385466	0.00516170794274892	0.00354065379699158	148	tags=39%, list=9%, signal=36%	ENSG00000164266/ENSG00000135124/ENSG00000086300/ENSG00000135218/ENSG00000055732/ENSG00000144891/ENSG00000155962/ENSG00000089041/ENSG00000151882/ENSG00000135914/ENSG00000163823
GO:0072507	BP	GO:0072507	divalent inorganic cation homeostasis	29	-0.560488312463007	-2.28052976135158	0.000635324015247776	0.00516170794274892	0.00354065379699158	148	tags=38%, list=9%, signal=35%	ENSG00000164266/ENSG00000135124/ENSG00000086300/ENSG00000135218/ENSG00000055732/ENSG00000144891/ENSG00000155962/ENSG00000089041/ENSG00000151882/ENSG00000135914/ENSG00000163823
GO:0016125	BP	GO:0016125	sterol metabolic process	27	-0.540161994953662	-2.1560507919908	0.000624804748516089	0.00516170794274892	0.00354065379699158	507	tags=74%, list=31%, signal=52%	ENSG00000116133/ENSG00000132196/ENSG00000072310/ENSG00000107798/ENSG00000141447/ENSG00000177628/ENSG00000067064/ENSG00000130164/ENSG00000125629/ENSG00000110921/ENSG00000172893/ENSG00000052802/ENSG00000167508/ENSG00000073060/ENSG00000160285/ENSG00000119655/ENSG00000141458/ENSG00000186480/ENSG00000112972/ENSG00000137869
GO:0003735	MF	GO:0003735	structural constituent of ribosome	29	-0.518611987381703	-2.11014225545644	0.000635324015247776	0.00516170794274892	0.00354065379699158	793	tags=100%, list=49%, signal=52%	ENSG00000105640/ENSG00000063177/ENSG00000198755/ENSG00000142937/ENSG00000089157/ENSG00000156482/ENSG00000188846/ENSG00000115268/ENSG00000142534/ENSG00000148303/ENSG00000100316/ENSG00000174748/ENSG00000162244/ENSG00000177600/ENSG00000083845/ENSG00000221983/ENSG00000105372/ENSG00000186468/ENSG00000164587/ENSG00000140988/ENSG00000167526/ENSG00000130312/ENSG00000122406/ENSG00000147403/ENSG00000108107…
GO:0048771	BP	GO:0048771	tissue remodeling	27	-0.524737512481962	-2.09448413613599	0.000624804748516089	0.00516170794274892	0.00354065379699158	418	tags=67%, list=26%, signal=50%	ENSG00000116016/ENSG00000107798/ENSG00000087245/ENSG00000187098/ENSG00000155846/ENSG00000164867/ENSG00000225190/ENSG00000157227/ENSG00000166340/ENSG00000086300/ENSG00000132170/ENSG00000119699/ENSG00000146374/ENSG00000102575/ENSG00000143387/ENSG00000118785/ENSG00000089041/ENSG00000136235
GO:0003682	MF	GO:0003682	chromatin binding	80	0.452499922779993	1.89487883864738	0.000629089079013588	0.00516170794274892	0.00354065379699158	381	tags=44%, list=24%, signal=35%	ENSG00000131747/ENSG00000117724/ENSG00000170312/ENSG00000121152/ENSG00000174371/ENSG00000136492/ENSG00000051341/ENSG00000093009/ENSG00000115163/ENSG00000119969/ENSG00000125885/ENSG00000156802/ENSG00000146670/ENSG00000085840/ENSG00000106462/ENSG00000113810/ENSG00000167513/ENSG00000166803/ENSG00000101945/ENSG00000080839/ENSG00000101096/ENSG00000167670/ENSG00000077152/ENSG00000057657/ENSG00000101868…
GO:0016042	BP	GO:0016042	lipid catabolic process	32	-0.500172000560289	-2.08076723851739	0.00065359477124183	0.00529018624993857	0.00362878299981119	548	tags=72%, list=34%, signal=48%	ENSG00000049860/ENSG00000068903/ENSG00000104823/ENSG00000120437/ENSG00000135446/ENSG00000103066/ENSG00000107798/ENSG00000134324/ENSG00000204386/ENSG00000177628/ENSG00000104763/ENSG00000213614/ENSG00000138413/ENSG00000176485/ENSG00000185950/ENSG00000130164/ENSG00000203837/ENSG00000196743/ENSG00000073060/ENSG00000133321/ENSG00000118785/ENSG00000137869/ENSG00000087076
GO:0062012	BP	GO:0062012	regulation of small molecule metabolic process	33	-0.496730976784913	-2.08913481343388	0.000658761528326746	0.0052922148152518	0.00363017448641958	403	tags=70%, list=25%, signal=53%	ENSG00000069667/ENSG00000072310/ENSG00000123836/ENSG00000150907/ENSG00000164211/ENSG00000185950/ENSG00000130164/ENSG00000164867/ENSG00000185345/ENSG00000125629/ENSG00000205542/ENSG00000172893/ENSG00000155465/ENSG00000158122/ENSG00000186480/ENSG00000132170/ENSG00000119508/ENSG00000025434/ENSG00000173281/ENSG00000089041/ENSG00000102445/ENSG00000109819/ENSG00000121769
GO:0006790	BP	GO:0006790	sulfur compound metabolic process	33	-0.491597751960222	-2.0675456652075	0.000658761528326746	0.0052922148152518	0.00363017448641958	643	tags=79%, list=40%, signal=48%	ENSG00000114779/ENSG00000233276/ENSG00000128309/ENSG00000104687/ENSG00000135677/ENSG00000177000/ENSG00000064225/ENSG00000144746/ENSG00000278540/ENSG00000141337/ENSG00000170266/ENSG00000136003/ENSG00000040531/ENSG00000197093/ENSG00000138413/ENSG00000131069/ENSG00000110921/ENSG00000151790/ENSG00000167468/ENSG00000175264/ENSG00000183549/ENSG00000167107/ENSG00000167508/ENSG00000112972/ENSG00000155962…
GO:0051293	BP	GO:0051293	establishment of spindle localization	10	0.775547669820493	2.03656004955221	0.000663680106188817	0.00529223432823897	0.0036301878712784	152	tags=70%, list=9%, signal=64%	ENSG00000137804/ENSG00000135476/ENSG00000080986/ENSG00000115163/ENSG00000186193/ENSG00000166851/ENSG00000164109
GO:0016192	BP	GO:0016192	vesicle-mediated transport	125	-0.327623871832403	-1.84606443531701	0.000662251655629139	0.00529223432823897	0.0036301878712784	334	tags=32%, list=21%, signal=28%	ENSG00000130164/ENSG00000107521/ENSG00000175471/ENSG00000185345/ENSG00000225190/ENSG00000164251/ENSG00000161011/ENSG00000064687/ENSG00000119729/ENSG00000168461/ENSG00000137501/ENSG00000167994/ENSG00000131981/ENSG00000137575/ENSG00000103490/ENSG00000188042/ENSG00000169891/ENSG00000139832/ENSG00000073060/ENSG00000187957/ENSG00000118473/ENSG00000141458/ENSG00000186480/ENSG00000166900/ENSG00000086300…
GO:0005773	CC	GO:0005773	vacuole	129	-0.432358317958232	-2.44195008118885	0.000676132521974307	0.00537163586646008	0.0036846530523595	636	tags=68%, list=39%, signal=45%	ENSG00000114573/ENSG00000149582/ENSG00000101421/ENSG00000123595/ENSG00000100568/ENSG00000117280/ENSG00000005893/ENSG00000165861/ENSG00000149357/ENSG00000077585/ENSG00000103249/ENSG00000135677/ENSG00000136710/ENSG00000143162/ENSG00000185339/ENSG00000049860/ENSG00000134108/ENSG00000188186/ENSG00000171130/ENSG00000141337/ENSG00000127955/ENSG00000170266/ENSG00000164938/ENSG00000108828/ENSG00000129925…
GO:0043603	BP	GO:0043603	cellular amide metabolic process	134	-0.33766268107185	-1.92611644941625	0.000685871056241427	0.00542897200032276	0.00372398255381858	921	tags=87%, list=57%, signal=41%	ENSG00000086598/ENSG00000165525/ENSG00000204394/ENSG00000102580/ENSG00000156256/ENSG00000100596/ENSG00000140598/ENSG00000165819/ENSG00000067900/ENSG00000198843/ENSG00000129245/ENSG00000006530/ENSG00000138668/ENSG00000118246/ENSG00000136937/ENSG00000148154/ENSG00000135829/ENSG00000114867/ENSG00000129351/ENSG00000158669/ENSG00000143486/ENSG00000178149/ENSG00000142676/ENSG00000054983/ENSG00000105640…
GO:0019216	BP	GO:0019216	regulation of lipid metabolic process	40	-0.458853996033905	-2.01776522391926	0.000705965407695023	0.00556755869145562	0.0038190455638948	464	tags=60%, list=29%, signal=44%	ENSG00000135446/ENSG00000069667/ENSG00000072310/ENSG00000134324/ENSG00000104763/ENSG00000138413/ENSG00000164211/ENSG00000185950/ENSG00000130164/ENSG00000125629/ENSG00000064687/ENSG00000172893/ENSG00000073060/ENSG00000119655/ENSG00000186480/ENSG00000132170/ENSG00000119508/ENSG00000025434/ENSG00000144891/ENSG00000169297/ENSG00000102445/ENSG00000135914/ENSG00000109819/ENSG00000121769
GO:0030003	BP	GO:0030003	cellular cation homeostasis	44	-0.506404219875754	-2.28682479108815	0.000737463126843658	0.00565423548984772	0.00387850118183018	211	tags=39%, list=13%, signal=35%	ENSG00000030582/ENSG00000156869/ENSG00000139832/ENSG00000164266/ENSG00000135124/ENSG00000167996/ENSG00000178301/ENSG00000135218/ENSG00000055732/ENSG00000144891/ENSG00000087086/ENSG00000155962/ENSG00000089041/ENSG00000151882/ENSG00000135914/ENSG00000163823/ENSG00000138449
GO:0055065	BP	GO:0055065	metal ion homeostasis	46	-0.450920361221771	-2.06336852372993	0.000743218134522482	0.00565423548984772	0.00387850118183018	169	tags=35%, list=10%, signal=32%	ENSG00000156869/ENSG00000169418/ENSG00000164266/ENSG00000135124/ENSG00000086300/ENSG00000167996/ENSG00000135218/ENSG00000055732/ENSG00000144891/ENSG00000087086/ENSG00000155962/ENSG00000089041/ENSG00000151882/ENSG00000135914/ENSG00000163823/ENSG00000138449
GO:0051235	BP	GO:0051235	maintenance of location	42	-0.460365259320541	-2.04929890851441	0.000726744186046512	0.00565423548984772	0.00387850118183018	377	tags=57%, list=23%, signal=45%	ENSG00000177628/ENSG00000158747/ENSG00000091039/ENSG00000164211/ENSG00000011638/ENSG00000125629/ENSG00000205542/ENSG00000250479/ENSG00000196743/ENSG00000135245/ENSG00000163624/ENSG00000073060/ENSG00000186480/ENSG00000132170/ENSG00000025434/ENSG00000167996/ENSG00000135218/ENSG00000055732/ENSG00000087086/ENSG00000147872/ENSG00000155962/ENSG00000089041/ENSG00000135914/ENSG00000006747
GO:2000045	BP	GO:2000045	regulation of G1/S transition of mitotic cell cycle	25	0.608885093339653	2.01814141586155	0.000737898465171192	0.00565423548984772	0.00387850118183018	302	tags=60%, list=19%, signal=50%	ENSG00000118193/ENSG00000171848/ENSG00000075218/ENSG00000154734/ENSG00000094804/ENSG00000101412/ENSG00000156876/ENSG00000123473/ENSG00000106462/ENSG00000123080/ENSG00000080839/ENSG00000172167/ENSG00000151849/ENSG00000123374/ENSG00000167325
GO:0005657	CC	GO:0005657	replication fork	26	0.603619998106368	2.01663258090407	0.000734969866235484	0.00565423548984772	0.00387850118183018	519	tags=81%, list=32%, signal=56%	ENSG00000065328/ENSG00000197299/ENSG00000196584/ENSG00000276043/ENSG00000198056/ENSG00000133119/ENSG00000111602/ENSG00000188486/ENSG00000146263/ENSG00000014138/ENSG00000101868/ENSG00000062822/ENSG00000160949/ENSG00000130816/ENSG00000140451/ENSG00000112118/ENSG00000163918/ENSG00000198554/ENSG00000070950/ENSG00000111445/ENSG00000049541
GO:0006631	BP	GO:0006631	fatty acid metabolic process	43	-0.448573258719945	-2.01615187547549	0.000730193501277839	0.00565423548984772	0.00387850118183018	566	tags=72%, list=35%, signal=48%	ENSG00000115425/ENSG00000081760/ENSG00000278540/ENSG00000104823/ENSG00000120437/ENSG00000155368/ENSG00000197894/ENSG00000134463/ENSG00000072310/ENSG00000103066/ENSG00000134324/ENSG00000104763/ENSG00000185950/ENSG00000143819/ENSG00000125629/ENSG00000167468/ENSG00000183549/ENSG00000052802/ENSG00000167107/ENSG00000169710/ENSG00000143554/ENSG00000186480/ENSG00000134824/ENSG00000132170/ENSG00000149485…
GO:0044815	CC	GO:0044815	DNA packaging complex	26	0.59469296720011	1.98680828510079	0.000734969866235484	0.00565423548984772	0.00387850118183018	355	tags=54%, list=22%, signal=43%	ENSG00000143228/ENSG00000109805/ENSG00000121152/ENSG00000152253/ENSG00000080986/ENSG00000163535/ENSG00000115163/ENSG00000161888/ENSG00000146918/ENSG00000113810/ENSG00000188486/ENSG00000151503/ENSG00000136824/ENSG00000010292
GO:0010506	BP	GO:0010506	regulation of autophagy	45	-0.42493118726224	-1.92990217986011	0.000743218134522482	0.00565423548984772	0.00387850118183018	685	tags=69%, list=42%, signal=41%	ENSG00000104765/ENSG00000197746/ENSG00000198911/ENSG00000114573/ENSG00000101421/ENSG00000077585/ENSG00000176046/ENSG00000068903/ENSG00000171130/ENSG00000164938/ENSG00000072310/ENSG00000156508/ENSG00000150907/ENSG00000177628/ENSG00000165507/ENSG00000070540/ENSG00000064601/ENSG00000166289/ENSG00000078804/ENSG00000185345/ENSG00000152137/ENSG00000179046/ENSG00000147416/ENSG00000103490/ENSG00000116954…
GO:0043410	BP	GO:0043410	positive regulation of MAPK cascade	44	-0.421197691114837	-1.90204837200373	0.000737463126843658	0.00565423548984772	0.00387850118183018	303	tags=43%, list=19%, signal=36%	ENSG00000164251/ENSG00000064687/ENSG00000108984/ENSG00000153064/ENSG00000137575/ENSG00000158122/ENSG00000103490/ENSG00000169083/ENSG00000129946/ENSG00000139946/ENSG00000133048/ENSG00000103154/ENSG00000119699/ENSG00000135218/ENSG00000135077/ENSG00000089041/ENSG00000136235/ENSG00000135914/ENSG00000163823
GO:0051049	BP	GO:0051049	regulation of transport	149	-0.285704856541308	-1.65270324694127	0.000741839762611276	0.00565423548984772	0.00387850118183018	403	tags=39%, list=25%, signal=32%	ENSG00000123836/ENSG00000105327/ENSG00000214274/ENSG00000119979/ENSG00000101400/ENSG00000109846/ENSG00000154309/ENSG00000091039/ENSG00000185950/ENSG00000169100/ENSG00000164867/ENSG00000175471/ENSG00000185345/ENSG00000164251/ENSG00000129158/ENSG00000164949/ENSG00000064687/ENSG00000144681/ENSG00000205542/ENSG00000250479/ENSG00000119729/ENSG00000108984/ENSG00000123700/ENSG00000168461/ENSG00000170379…
GO:0006629	BP	GO:0006629	lipid metabolic process	152	-0.454961808857788	-2.64143598629403	0.000758150113722517	0.00569003501234735	0.00390305772719746	569	tags=66%, list=35%, signal=47%	ENSG00000064225/ENSG00000115425/ENSG00000175826/ENSG00000081760/ENSG00000121064/ENSG00000049860/ENSG00000068903/ENSG00000278540/ENSG00000104823/ENSG00000127220/ENSG00000120437/ENSG00000187446/ENSG00000143772/ENSG00000111666/ENSG00000155368/ENSG00000116133/ENSG00000170266/ENSG00000136848/ENSG00000197894/ENSG00000134463/ENSG00000132196/ENSG00000129925/ENSG00000157326/ENSG00000135446/ENSG00000069667…
GO:0015075	MF	GO:0015075	ion transmembrane transporter activity	47	-0.460923206231822	-2.11841486772581	0.000752162467092892	0.00569003501234735	0.00390305772719746	337	tags=47%, list=21%, signal=38%	ENSG00000092068/ENSG00000169100/ENSG00000119899/ENSG00000059804/ENSG00000164300/ENSG00000123700/ENSG00000139974/ENSG00000174899/ENSG00000147416/ENSG00000171227/ENSG00000135124/ENSG00000166347/ENSG00000136531/ENSG00000175538/ENSG00000173930/ENSG00000135218/ENSG00000055732/ENSG00000072041/ENSG00000155962/ENSG00000089041/ENSG00000138449/ENSG00000166473
GO:2000241	BP	GO:2000241	regulation of reproductive process	21	0.628402971823018	1.99110652254604	0.000758495145631068	0.00569003501234735	0.00390305772719746	309	tags=62%, list=19%, signal=51%	ENSG00000066279/ENSG00000112742/ENSG00000156509/ENSG00000117399/ENSG00000158402/ENSG00000111247/ENSG00000087586/ENSG00000071539/ENSG00000106003/ENSG00000112029/ENSG00000164045/ENSG00000104368/ENSG00000102265
GO:0045005	BP	GO:0045005	DNA-templated DNA replication maintenance of fidelity	22	0.613363448318777	1.96764009901633	0.000754261577915221	0.00569003501234735	0.00390305772719746	346	tags=64%, list=21%, signal=51%	ENSG00000154920/ENSG00000197299/ENSG00000138658/ENSG00000139618/ENSG00000111602/ENSG00000138346/ENSG00000178295/ENSG00000146263/ENSG00000183763/ENSG00000187790/ENSG00000051180/ENSG00000062822/ENSG00000166801/ENSG00000160949
GO:0046470	BP	GO:0046470	phosphatidylcholine metabolic process	12	-0.662820033759644	-2.07225662236629	0.00077559462254395	0.0057981084108928	0.0039771902610715	523	tags=92%, list=32%, signal=62%	ENSG00000111666/ENSG00000155368/ENSG00000103066/ENSG00000176485/ENSG00000130164/ENSG00000163624/ENSG00000073060/ENSG00000133321/ENSG00000025434/ENSG00000102230/ENSG00000121769
GO:0006897	BP	GO:0006897	endocytosis	52	-0.399746453874807	-1.88629637740426	0.00078462142016477	0.00584529383257699	0.00400955692038307	334	tags=44%, list=21%, signal=36%	ENSG00000130164/ENSG00000175471/ENSG00000164251/ENSG00000064687/ENSG00000119729/ENSG00000168461/ENSG00000131981/ENSG00000137575/ENSG00000103490/ENSG00000169891/ENSG00000073060/ENSG00000187957/ENSG00000118473/ENSG00000141458/ENSG00000086300/ENSG00000158270/ENSG00000103154/ENSG00000135047/ENSG00000025434/ENSG00000135218/ENSG00000135914/ENSG00000159674/ENSG00000140022
GO:0004672	MF	GO:0004672	protein kinase activity	54	0.488854311657179	1.90637226928256	0.000801389074395619	0.00593790162885495	0.00407308088360598	321	tags=43%, list=20%, signal=35%	ENSG00000117650/ENSG00000112742/ENSG00000170312/ENSG00000156970/ENSG00000178999/ENSG00000168078/ENSG00000169679/ENSG00000127564/ENSG00000142731/ENSG00000087586/ENSG00000122966/ENSG00000166851/ENSG00000077264/ENSG00000154928/ENSG00000165304/ENSG00000065361/ENSG00000177602/ENSG00000163673/ENSG00000120539/ENSG00000123374/ENSG00000097046/ENSG00000060140/ENSG00000152953
GO:0042592	BP	GO:0042592	homeostatic process	164	-0.288324357694002	-1.70794704056406	0.000802568218298555	0.00593790162885495	0.00407308088360598	340	tags=33%, list=21%, signal=29%	ENSG00000185950/ENSG00000092068/ENSG00000130164/ENSG00000164867/ENSG00000078804/ENSG00000185345/ENSG00000225190/ENSG00000164251/ENSG00000161011/ENSG00000126603/ENSG00000188613/ENSG00000137265/ENSG00000113163/ENSG00000108984/ENSG00000123700/ENSG00000155093/ENSG00000030582/ENSG00000156869/ENSG00000139832/ENSG00000073060/ENSG00000169418/ENSG00000119655/ENSG00000166340/ENSG00000118473/ENSG00000164266…
GO:0010008	CC	GO:0010008	endosome membrane	56	-0.388925517766604	-1.86632723393478	0.000814332247557003	0.00600430592119941	0.00411863065364988	831	tags=91%, list=51%, signal=46%	ENSG00000160695/ENSG00000162627/ENSG00000131507/ENSG00000028528/ENSG00000105223/ENSG00000135926/ENSG00000103365/ENSG00000178996/ENSG00000205302/ENSG00000138760/ENSG00000154265/ENSG00000112335/ENSG00000168118/ENSG00000221983/ENSG00000165406/ENSG00000101421/ENSG00000100568/ENSG00000143545/ENSG00000005893/ENSG00000149357/ENSG00000197081/ENSG00000175220/ENSG00000134108/ENSG00000188186/ENSG00000171130…
GO:0062013	BP	GO:0062013	positive regulation of small molecule metabolic process	16	-0.611133910587118	-2.07682970177212	0.000832408435072142	0.00605105029145096	0.00415069477542019	452	tags=75%, list=28%, signal=55%	ENSG00000072310/ENSG00000150907/ENSG00000164211/ENSG00000185950/ENSG00000164867/ENSG00000205542/ENSG00000158122/ENSG00000132170/ENSG00000119508/ENSG00000025434/ENSG00000089041/ENSG00000109819
GO:0042470	CC	GO:0042470	melanosome	17	-0.59492609442784	-2.06577522491187	0.000834724540901503	0.00605105029145096	0.00415069477542019	470	tags=76%, list=29%, signal=55%	ENSG00000185896/ENSG00000040531/ENSG00000117984/ENSG00000118508/ENSG00000157227/ENSG00000137501/ENSG00000137575/ENSG00000147416/ENSG00000148175/ENSG00000169710/ENSG00000166340/ENSG00000166900/ENSG00000136235
GO:0048770	CC	GO:0048770	pigment granule	17	-0.59492609442784	-2.06577522491187	0.000834724540901503	0.00605105029145096	0.00415069477542019	470	tags=76%, list=29%, signal=55%	ENSG00000185896/ENSG00000040531/ENSG00000117984/ENSG00000118508/ENSG00000157227/ENSG00000137501/ENSG00000137575/ENSG00000147416/ENSG00000148175/ENSG00000169710/ENSG00000166340/ENSG00000166900/ENSG00000136235
GO:0000940	CC	GO:0000940	outer kinetochore	10	0.774400292811559	2.0335470791455	0.000829600132736021	0.00605105029145096	0.00415069477542019	288	tags=80%, list=18%, signal=66%	ENSG00000117724/ENSG00000154839/ENSG00000156970/ENSG00000080986/ENSG00000165480/ENSG00000166851/ENSG00000134057/ENSG00000040275
GO:0010971	BP	GO:0010971	positive regulation of G2/M transition of mitotic cell cycle	11	0.744723547822001	2.00210708298401	0.000824402308326463	0.00605105029145096	0.00415069477542019	302	tags=82%, list=19%, signal=67%	ENSG00000170312/ENSG00000158402/ENSG00000143476/ENSG00000161692/ENSG00000134057/ENSG00000112029/ENSG00000164045/ENSG00000097046/ENSG00000167325
GO:0044281	BP	GO:0044281	small molecule metabolic process	172	-0.358581117603197	-2.14138649734958	0.000858369098712446	0.00620157271653657	0.00425394505649439	539	tags=58%, list=33%, signal=43%	ENSG00000278540/ENSG00000104823/ENSG00000120437/ENSG00000130005/ENSG00000143772/ENSG00000111666/ENSG00000141698/ENSG00000155368/ENSG00000116133/ENSG00000130821/ENSG00000170266/ENSG00000173598/ENSG00000197894/ENSG00000134463/ENSG00000132196/ENSG00000079739/ENSG00000157326/ENSG00000069667/ENSG00000072310/ENSG00000103066/ENSG00000143774/ENSG00000166228/ENSG00000100979/ENSG00000040531/ENSG00000134324…
GO:0009914	BP	GO:0009914	hormone transport	21	-0.575552239137595	-2.12685349685305	0.000879765395894428	0.0063348993222766	0.00434539993113847	452	tags=71%, list=28%, signal=52%	ENSG00000072310/ENSG00000075073/ENSG00000124766/ENSG00000123836/ENSG00000185950/ENSG00000092068/ENSG00000185345/ENSG00000155093/ENSG00000136689/ENSG00000164266/ENSG00000132170/ENSG00000144891/ENSG00000118785/ENSG00000137869/ENSG00000103316
GO:0070507	BP	GO:0070507	regulation of microtubule cytoskeleton organization	25	0.59533699622818	1.97323643101981	0.000885478158205431	0.00635478158205431	0.00435903809109551	404	tags=60%, list=25%, signal=46%	ENSG00000121621/ENSG00000154839/ENSG00000163808/ENSG00000076382/ENSG00000088325/ENSG00000165480/ENSG00000013810/ENSG00000166851/ENSG00000136108/ENSG00000134222/ENSG00000136122/ENSG00000117632/ENSG00000121957/ENSG00000127914/ENSG00000182504
GO:0042277	MF	GO:0042277	peptide binding	22	-0.556994872899684	-2.09250097681914	0.000889415950192707	0.00636183568360431	0.00436387682504063	396	tags=64%, list=25%, signal=49%	ENSG00000214274/ENSG00000109846/ENSG00000092068/ENSG00000130164/ENSG00000158019/ENSG00000073060/ENSG00000169418/ENSG00000166340/ENSG00000132170/ENSG00000158473/ENSG00000135218/ENSG00000198502/ENSG00000196549/ENSG00000138449
GO:0033260	BP	GO:0033260	nuclear DNA replication	20	0.6372915934145	1.9978432447406	0.00091547146780592	0.0065265234112124	0.00447684374113526	391	tags=75%, list=24%, signal=58%	ENSG00000093009/ENSG00000197299/ENSG00000139618/ENSG00000161692/ENSG00000176208/ENSG00000167513/ENSG00000138346/ENSG00000097046/ENSG00000101868/ENSG00000051180/ENSG00000006634/ENSG00000105486/ENSG00000101003/ENSG00000112118/ENSG00000073111
GO:0010972	BP	GO:0010972	negative regulation of G2/M transition of mitotic cell cycle	18	0.64498748498378	1.97180883354634	0.000927787227462502	0.00654926524828448	0.00449244341718685	201	tags=50%, list=12%, signal=44%	ENSG00000170312/ENSG00000178999/ENSG00000197299/ENSG00000092853/ENSG00000012048/ENSG00000143476/ENSG00000166851/ENSG00000094804/ENSG00000085840
GO:1902750	BP	GO:1902750	negative regulation of cell cycle G2/M phase transition	18	0.64498748498378	1.97180883354634	0.000927787227462502	0.00654926524828448	0.00449244341718685	201	tags=50%, list=12%, signal=44%	ENSG00000170312/ENSG00000178999/ENSG00000197299/ENSG00000092853/ENSG00000012048/ENSG00000143476/ENSG00000166851/ENSG00000094804/ENSG00000085840
GO:0031297	BP	GO:0031297	replication fork processing	18	0.642449579599148	1.96405013376902	0.000927787227462502	0.00654926524828448	0.00449244341718685	346	tags=67%, list=21%, signal=53%	ENSG00000154920/ENSG00000197299/ENSG00000138658/ENSG00000139618/ENSG00000138346/ENSG00000178295/ENSG00000146263/ENSG00000183763/ENSG00000187790/ENSG00000051180/ENSG00000166801/ENSG00000160949
GO:1902652	BP	GO:1902652	secondary alcohol metabolic process	26	-0.53050533826904	-2.08592117503266	0.000937793060331354	0.00659826293756014	0.00452605319451286	507	tags=73%, list=31%, signal=51%	ENSG00000116133/ENSG00000132196/ENSG00000072310/ENSG00000141447/ENSG00000177628/ENSG00000067064/ENSG00000138413/ENSG00000130164/ENSG00000125629/ENSG00000110921/ENSG00000172893/ENSG00000052802/ENSG00000167508/ENSG00000073060/ENSG00000160285/ENSG00000119655/ENSG00000141458/ENSG00000186480/ENSG00000112972
GO:0015849	BP	GO:0015849	organic acid transport	29	-0.492136654435001	-2.00241871620667	0.000952986022871665	0.00668331891609998	0.00458439701727737	340	tags=59%, list=21%, signal=47%	ENSG00000185950/ENSG00000092068/ENSG00000119899/ENSG00000164300/ENSG00000108984/ENSG00000139974/ENSG00000174899/ENSG00000155465/ENSG00000143554/ENSG00000135124/ENSG00000132170/ENSG00000110203/ENSG00000135218/ENSG00000147872/ENSG00000072041/ENSG00000089041/ENSG00000121769
GO:0016197	BP	GO:0016197	endosomal transport	30	-0.492424814218303	-2.01549428674977	0.000965250965250965	0.00674735496164068	0.00462832229749523	811	tags=100%, list=50%, signal=51%	ENSG00000028528/ENSG00000100284/ENSG00000104946/ENSG00000149823/ENSG00000104915/ENSG00000178996/ENSG00000205302/ENSG00000157538/ENSG00000112335/ENSG00000099290/ENSG00000196072/ENSG00000143669/ENSG00000161835/ENSG00000101421/ENSG00000123595/ENSG00000100568/ENSG00000117280/ENSG00000143545/ENSG00000149357/ENSG00000175220/ENSG00000134108/ENSG00000102189/ENSG00000106266/ENSG00000119979/ENSG00000185345…
GO:0008654	BP	GO:0008654	phospholipid biosynthetic process	33	-0.487060281631942	-2.04846212165825	0.000988142292490119	0.00688501733246351	0.0047227512735944	548	tags=67%, list=34%, signal=45%	ENSG00000049860/ENSG00000127220/ENSG00000187446/ENSG00000143772/ENSG00000111666/ENSG00000133056/ENSG00000168890/ENSG00000134324/ENSG00000067064/ENSG00000103043/ENSG00000138413/ENSG00000176485/ENSG00000110921/ENSG00000164300/ENSG00000185813/ENSG00000163624/ENSG00000167508/ENSG00000112972/ENSG00000149485/ENSG00000102230/ENSG00000135914/ENSG00000121769
GO:0015908	BP	GO:0015908	fatty acid transport	10	-0.713392179569944	-2.07859455594759	0.0010062893081761	0.00698884155001014	0.00479396909803419	153	tags=90%, list=9%, signal=82%	ENSG00000185950/ENSG00000108984/ENSG00000143554/ENSG00000135124/ENSG00000132170/ENSG00000135218/ENSG00000147872/ENSG00000089041/ENSG00000121769
GO:0015918	BP	GO:0015918	sterol transport	12	-0.655719276228576	-2.0500566418767	0.00103412616339193	0.00703570245917354	0.00482611315922481	422	tags=83%, list=26%, signal=62%	ENSG00000100979/ENSG00000141447/ENSG00000091039/ENSG00000164211/ENSG00000130164/ENSG00000073060/ENSG00000119655/ENSG00000141458/ENSG00000025434/ENSG00000135218
GO:0015318	MF	GO:0015318	inorganic molecular entity transmembrane transporter activity	35	-0.478221290385485	-2.03408460661133	0.00101729399796541	0.00703570245917354	0.00482611315922481	160	tags=40%, list=10%, signal=37%	ENSG00000123700/ENSG00000147416/ENSG00000171227/ENSG00000135124/ENSG00000166347/ENSG00000136531/ENSG00000175538/ENSG00000178301/ENSG00000055732/ENSG00000072041/ENSG00000155962/ENSG00000089041/ENSG00000138449/ENSG00000166473
GO:1903530	BP	GO:1903530	regulation of secretion by cell	37	-0.471310272898871	-2.03342532111851	0.00103591160220994	0.00703570245917354	0.00482611315922481	470	tags=65%, list=29%, signal=47%	ENSG00000185896/ENSG00000072310/ENSG00000075073/ENSG00000124766/ENSG00000123836/ENSG00000214274/ENSG00000154309/ENSG00000185950/ENSG00000175471/ENSG00000185345/ENSG00000164251/ENSG00000129158/ENSG00000108984/ENSG00000137575/ENSG00000164266/ENSG00000135124/ENSG00000132170/ENSG00000119699/ENSG00000025434/ENSG00000101605/ENSG00000144891/ENSG00000118785/ENSG00000137869/ENSG00000089041
GO:0005496	MF	GO:0005496	steroid binding	12	-0.648908766276397	-2.02876409845426	0.00103412616339193	0.00703570245917354	0.00482611315922481	461	tags=83%, list=29%, signal=60%	ENSG00000069667/ENSG00000141447/ENSG00000091039/ENSG00000164211/ENSG00000125629/ENSG00000169083/ENSG00000119655/ENSG00000141458/ENSG00000186480/ENSG00000025434
GO:0006040	BP	GO:0006040	amino sugar metabolic process	12	-0.647935580559646	-2.02572150703635	0.00103412616339193	0.00703570245917354	0.00482611315922481	308	tags=67%, list=19%, signal=54%	ENSG00000167363/ENSG00000175264/ENSG00000064886/ENSG00000162066/ENSG00000133048/ENSG00000113552/ENSG00000197355/ENSG00000102032
GO:0005887	CC	GO:0005887	integral component of plasma membrane	89	-0.367221330535831	-1.94627488849318	0.00103092783505155	0.00703570245917354	0.00482611315922481	250	tags=36%, list=15%, signal=32%	ENSG00000123700/ENSG00000139974/ENSG00000155465/ENSG00000137575/ENSG00000008277/ENSG00000155093/ENSG00000182612/ENSG00000148175/ENSG00000115525/ENSG00000073060/ENSG00000136732/ENSG00000137507/ENSG00000141458/ENSG00000134824/ENSG00000135124/ENSG00000136531/ENSG00000184916/ENSG00000102996/ENSG00000133083/ENSG00000173930/ENSG00000158473/ENSG00000135218/ENSG00000144891/ENSG00000072041/ENSG00000089041…
GO:0033993	BP	GO:0033993	response to lipid	89	-0.362720421594333	-1.922420048592	0.00103092783505155	0.00703570245917354	0.00482611315922481	395	tags=48%, list=24%, signal=39%	ENSG00000150907/ENSG00000087245/ENSG00000184216/ENSG00000189067/ENSG00000177628/ENSG00000109846/ENSG00000172819/ENSG00000152518/ENSG00000155846/ENSG00000138413/ENSG00000130164/ENSG00000164867/ENSG00000125629/ENSG00000176971/ENSG00000111674/ENSG00000136696/ENSG00000167468/ENSG00000103490/ENSG00000136689/ENSG00000169083/ENSG00000073060/ENSG00000204397/ENSG00000141458/ENSG00000186480/ENSG00000132170…
GO:0043269	BP	GO:0043269	regulation of ion transport	38	-0.443102738610241	-1.92226701220983	0.00105189340813464	0.00709945613703412	0.0048698447504138	318	tags=47%, list=20%, signal=39%	ENSG00000164867/ENSG00000185345/ENSG00000164949/ENSG00000144681/ENSG00000205542/ENSG00000108984/ENSG00000123700/ENSG00000170379/ENSG00000131981/ENSG00000148175/ENSG00000171227/ENSG00000164266/ENSG00000135124/ENSG00000136531/ENSG00000175538/ENSG00000155962/ENSG00000089041/ENSG00000163823
GO:0008324	MF	GO:0008324	cation transmembrane transporter activity	38	-0.439394040998758	-1.90617795101564	0.00105189340813464	0.00709945613703412	0.0048698447504138	337	tags=45%, list=21%, signal=36%	ENSG00000092068/ENSG00000119899/ENSG00000164300/ENSG00000123700/ENSG00000139974/ENSG00000174899/ENSG00000147416/ENSG00000171227/ENSG00000135124/ENSG00000166347/ENSG00000136531/ENSG00000175538/ENSG00000055732/ENSG00000072041/ENSG00000089041/ENSG00000138449/ENSG00000166473
GO:0048878	BP	GO:0048878	chemical homeostasis	98	-0.359391693747564	-1.9389436064882	0.00107584722969338	0.0072384346422808	0.00496517652388098	221	tags=30%, list=14%, signal=27%	ENSG00000155093/ENSG00000030582/ENSG00000156869/ENSG00000139832/ENSG00000073060/ENSG00000169418/ENSG00000119655/ENSG00000164266/ENSG00000141458/ENSG00000186480/ENSG00000135124/ENSG00000086300/ENSG00000132170/ENSG00000175538/ENSG00000025434/ENSG00000167996/ENSG00000178301/ENSG00000135218/ENSG00000055732/ENSG00000144891/ENSG00000087086/ENSG00000155962/ENSG00000089041/ENSG00000151882/ENSG00000135914…
GO:0005768	CC	GO:0005768	endosome	97	-0.318737721669704	-1.71361234081119	0.00108283703302653	0.00726276676668573	0.00498186705143867	788	tags=81%, list=49%, signal=44%	ENSG00000135926/ENSG00000103365/ENSG00000100284/ENSG00000104946/ENSG00000149823/ENSG00000100711/ENSG00000178996/ENSG00000205302/ENSG00000138760/ENSG00000157538/ENSG00000154265/ENSG00000112335/ENSG00000099290/ENSG00000170088/ENSG00000168118/ENSG00000197746/ENSG00000221983/ENSG00000165406/ENSG00000149582/ENSG00000101421/ENSG00000123595/ENSG00000100568/ENSG00000117280/ENSG00000143545/ENSG00000005893…
GO:0004674	MF	GO:0004674	protein serine/threonine kinase activity	45	0.511691036470122	1.92500648654042	0.00109424155382301	0.00731646604155569	0.00501870186339875	321	tags=44%, list=20%, signal=37%	ENSG00000117650/ENSG00000112742/ENSG00000170312/ENSG00000156970/ENSG00000178999/ENSG00000168078/ENSG00000169679/ENSG00000127564/ENSG00000142731/ENSG00000087586/ENSG00000122966/ENSG00000166851/ENSG00000077264/ENSG00000165304/ENSG00000177602/ENSG00000163673/ENSG00000120539/ENSG00000123374/ENSG00000097046/ENSG00000152953
GO:0019637	BP	GO:0019637	organophosphate metabolic process	103	-0.35943000813799	-1.95672321450154	0.00112107623318386	0.00747268461314193	0.00512585939435213	549	tags=58%, list=34%, signal=41%	ENSG00000176046/ENSG00000049860/ENSG00000278540/ENSG00000127220/ENSG00000187446/ENSG00000143772/ENSG00000130313/ENSG00000111666/ENSG00000141698/ENSG00000155368/ENSG00000173598/ENSG00000079739/ENSG00000069667/ENSG00000133056/ENSG00000103066/ENSG00000143774/ENSG00000168890/ENSG00000134324/ENSG00000123836/ENSG00000067064/ENSG00000091039/ENSG00000103043/ENSG00000138413/ENSG00000176485/ENSG00000130164…
GO:0006268	BP	GO:0006268	DNA unwinding involved in DNA replication	12	0.717852684144819	1.97218352386944	0.00114118030648843	0.00755988061498332	0.0051856711579053	464	tags=100%, list=29%, signal=72%	ENSG00000093009/ENSG00000197299/ENSG00000147536/ENSG00000160957/ENSG00000100297/ENSG00000131153/ENSG00000051180/ENSG00000101003/ENSG00000112118/ENSG00000073111/ENSG00000166508/ENSG00000104738
GO:0030010	BP	GO:0030010	establishment of cell polarity	12	0.715636574487351	1.96609512293415	0.00114118030648843	0.00755988061498332	0.0051856711579053	348	tags=75%, list=22%, signal=59%	ENSG00000138182/ENSG00000080986/ENSG00000115163/ENSG00000186193/ENSG00000166851/ENSG00000164109/ENSG00000154928/ENSG00000040275/ENSG00000121957
GO:0006887	BP	GO:0006887	exocytosis	21	-0.569312039628211	-2.10379392163972	0.00117302052785924	0.00763173967154098	0.00523496260257267	311	tags=86%, list=19%, signal=70%	ENSG00000123595/ENSG00000100568/ENSG00000143545/ENSG00000105402/ENSG00000006451/ENSG00000134108/ENSG00000185896/ENSG00000185345/ENSG00000164251/ENSG00000168461/ENSG00000137501/ENSG00000167994/ENSG00000137575/ENSG00000166900/ENSG00000119508/ENSG00000089041/ENSG00000006747/ENSG00000163823
GO:0007076	BP	GO:0007076	mitotic chromosome condensation	10	0.760120283922538	1.99604829378088	0.00116144018583043	0.00763173967154098	0.00523496260257267	355	tags=90%, list=22%, signal=71%	ENSG00000109805/ENSG00000121152/ENSG00000137804/ENSG00000166851/ENSG00000146670/ENSG00000113810/ENSG00000151503/ENSG00000136824/ENSG00000010292
GO:1900087	BP	GO:1900087	positive regulation of G1/S transition of mitotic cell cycle	10	0.756715252959484	1.98710680598239	0.00116144018583043	0.00763173967154098	0.00523496260257267	302	tags=80%, list=19%, signal=65%	ENSG00000171848/ENSG00000154734/ENSG00000094804/ENSG00000156876/ENSG00000123473/ENSG00000172167/ENSG00000151849/ENSG00000167325
GO:0012506	CC	GO:0012506	vesicle membrane	108	-0.326470380742706	-1.78526561207189	0.00117302052785924	0.00763173967154098	0.00523496260257267	715	tags=69%, list=44%, signal=41%	ENSG00000108219/ENSG00000154265/ENSG00000145685/ENSG00000112335/ENSG00000109323/ENSG00000130787/ENSG00000168118/ENSG00000197746/ENSG00000221983/ENSG00000198911/ENSG00000165406/ENSG00000101421/ENSG00000078053/ENSG00000123595/ENSG00000100568/ENSG00000143545/ENSG00000005893/ENSG00000149357/ENSG00000197081/ENSG00000175220/ENSG00000006451/ENSG00000118804/ENSG00000156535/ENSG00000134108/ENSG00000188186…
GO:0030659	CC	GO:0030659	cytoplasmic vesicle membrane	107	-0.323810674159052	-1.76686634162689	0.00117096018735363	0.00763173967154098	0.00523496260257267	715	tags=69%, list=44%, signal=41%	ENSG00000108219/ENSG00000154265/ENSG00000145685/ENSG00000112335/ENSG00000109323/ENSG00000130787/ENSG00000168118/ENSG00000197746/ENSG00000221983/ENSG00000198911/ENSG00000165406/ENSG00000101421/ENSG00000078053/ENSG00000123595/ENSG00000100568/ENSG00000143545/ENSG00000005893/ENSG00000149357/ENSG00000197081/ENSG00000175220/ENSG00000006451/ENSG00000118804/ENSG00000156535/ENSG00000134108/ENSG00000188186…
GO:0140513	CC	GO:0140513	nuclear protein-containing complex	129	0.380092756212092	1.71059909498176	0.00117329578786812	0.00763173967154098	0.00523496260257267	643	tags=61%, list=40%, signal=40%	ENSG00000065328/ENSG00000129173/ENSG00000156970/ENSG00000117399/ENSG00000136492/ENSG00000175063/ENSG00000093009/ENSG00000187741/ENSG00000101057/ENSG00000089685/ENSG00000012048/ENSG00000196584/ENSG00000138376/ENSG00000147536/ENSG00000164109/ENSG00000198056/ENSG00000139618/ENSG00000007968/ENSG00000100297/ENSG00000085840/ENSG00000213347/ENSG00000101412/ENSG00000111602/ENSG00000106462/ENSG00000181544…
GO:1901135	BP	GO:1901135	carbohydrate derivative metabolic process	114	-0.306690711951258	-1.69588042429097	0.00122399020807834	0.00793750276503812	0.00544469962566235	308	tags=33%, list=19%, signal=29%	ENSG00000167363/ENSG00000243811/ENSG00000110921/ENSG00000151790/ENSG00000064687/ENSG00000111674/ENSG00000205542/ENSG00000196743/ENSG00000119729/ENSG00000175264/ENSG00000262406/ENSG00000064886/ENSG00000183549/ENSG00000196562/ENSG00000158122/ENSG00000172986/ENSG00000167107/ENSG00000115525/ENSG00000167508/ENSG00000114268/ENSG00000169418/ENSG00000183828/ENSG00000162066/ENSG00000141458/ENSG00000112972…
GO:0048609	BP	GO:0048609	multicellular organismal reproductive process	85	0.431789759196548	1.83012305351438	0.00124115675809855	0.00802465615671524	0.0055044821609365	303	tags=40%, list=19%, signal=34%	ENSG00000066279/ENSG00000131747/ENSG00000121621/ENSG00000112742/ENSG00000137812/ENSG00000121152/ENSG00000136492/ENSG00000170961/ENSG00000080986/ENSG00000185697/ENSG00000158402/ENSG00000100206/ENSG00000187741/ENSG00000105011/ENSG00000087586/ENSG00000144554/ENSG00000157456/ENSG00000125885/ENSG00000166851/ENSG00000154734/ENSG00000139618/ENSG00000266524/ENSG00000071539/ENSG00000161800/ENSG00000164611…
GO:0045017	BP	GO:0045017	glycerolipid biosynthetic process	27	-0.50809263802539	-2.02804629880211	0.00124960949703218	0.0080551175063182	0.00552537700704742	563	tags=70%, list=35%, signal=47%	ENSG00000175826/ENSG00000127220/ENSG00000143772/ENSG00000111666/ENSG00000072310/ENSG00000133056/ENSG00000103066/ENSG00000168890/ENSG00000134324/ENSG00000214274/ENSG00000103043/ENSG00000130164/ENSG00000185813/ENSG00000163624/ENSG00000073060/ENSG00000025434/ENSG00000102230/ENSG00000135914/ENSG00000121769
GO:0022890	MF	GO:0022890	inorganic cation transmembrane transporter activity	29	-0.481831569088566	-1.96048911071224	0.00127064803049555	0.00816628420793112	0.00560163138031504	250	tags=41%, list=15%, signal=36%	ENSG00000123700/ENSG00000147416/ENSG00000171227/ENSG00000135124/ENSG00000166347/ENSG00000136531/ENSG00000175538/ENSG00000055732/ENSG00000072041/ENSG00000089041/ENSG00000138449/ENSG00000166473
GO:0006695	BP	GO:0006695	cholesterol biosynthetic process	13	-0.647415332001103	-2.07609935165032	0.00131578947368421	0.00835662164260208	0.00573219261474599	507	tags=92%, list=31%, signal=64%	ENSG00000116133/ENSG00000132196/ENSG00000072310/ENSG00000067064/ENSG00000125629/ENSG00000110921/ENSG00000172893/ENSG00000052802/ENSG00000167508/ENSG00000160285/ENSG00000186480/ENSG00000112972
GO:0016126	BP	GO:0016126	sterol biosynthetic process	13	-0.647415332001103	-2.07609935165032	0.00131578947368421	0.00835662164260208	0.00573219261474599	507	tags=92%, list=31%, signal=64%	ENSG00000116133/ENSG00000132196/ENSG00000072310/ENSG00000067064/ENSG00000125629/ENSG00000110921/ENSG00000172893/ENSG00000052802/ENSG00000167508/ENSG00000160285/ENSG00000186480/ENSG00000112972
GO:1902653	BP	GO:1902653	secondary alcohol biosynthetic process	13	-0.647415332001103	-2.07609935165032	0.00131578947368421	0.00835662164260208	0.00573219261474599	507	tags=92%, list=31%, signal=64%	ENSG00000116133/ENSG00000132196/ENSG00000072310/ENSG00000067064/ENSG00000125629/ENSG00000110921/ENSG00000172893/ENSG00000052802/ENSG00000167508/ENSG00000160285/ENSG00000186480/ENSG00000112972
GO:0002682	BP	GO:0002682	regulation of immune system process	122	-0.313330093670861	-1.75527437845657	0.00130890052356021	0.00835662164260208	0.00573219261474599	397	tags=40%, list=25%, signal=33%	ENSG00000157873/ENSG00000187098/ENSG00000115594/ENSG00000184216/ENSG00000090487/ENSG00000172819/ENSG00000152518/ENSG00000158747/ENSG00000155846/ENSG00000105373/ENSG00000185950/ENSG00000130164/ENSG00000197635/ENSG00000157227/ENSG00000164251/ENSG00000136696/ENSG00000138795/ENSG00000137265/ENSG00000262406/ENSG00000108984/ENSG00000153064/ENSG00000131981/ENSG00000103490/ENSG00000030582/ENSG00000137507…
GO:0010212	BP	GO:0010212	response to ionizing radiation	24	0.579052640480962	1.89605334835098	0.00133968442988985	0.00845847676701714	0.00580205974729266	387	tags=58%, list=24%, signal=45%	ENSG00000197299/ENSG00000085999/ENSG00000111247/ENSG00000012048/ENSG00000196584/ENSG00000144554/ENSG00000138376/ENSG00000139618/ENSG00000114346/ENSG00000188486/ENSG00000051180/ENSG00000149948/ENSG00000132436/ENSG00000173848
GO:0016310	BP	GO:0016310	phosphorylation	192	0.343042763687427	1.61855425988901	0.00133585661805633	0.00845847676701714	0.00580205974729266	340	tags=33%, list=21%, signal=30%	ENSG00000138778/ENSG00000183856/ENSG00000117650/ENSG00000112742/ENSG00000118193/ENSG00000170312/ENSG00000156970/ENSG00000178999/ENSG00000168078/ENSG00000169679/ENSG00000158402/ENSG00000197299/ENSG00000127564/ENSG00000088325/ENSG00000142731/ENSG00000092853/ENSG00000089685/ENSG00000145386/ENSG00000087586/ENSG00000157456/ENSG00000122966/ENSG00000138376/ENSG00000167900/ENSG00000166851/ENSG00000100526…
GO:0005319	MF	GO:0005319	lipid transporter activity	14	-0.627644943947735	-2.0467460622325	0.00135464643727987	0.00848927898302144	0.00582318840940626	422	tags=79%, list=26%, signal=59%	ENSG00000100979/ENSG00000141447/ENSG00000091039/ENSG00000164211/ENSG00000064687/ENSG00000196743/ENSG00000113163/ENSG00000119655/ENSG00000143554/ENSG00000141458/ENSG00000135218
GO:0005840	CC	GO:0005840	ribosome	35	-0.456507331417878	-1.94172562851356	0.00135639199728722	0.00848927898302144	0.00582318840940626	793	tags=91%, list=49%, signal=48%	ENSG00000142676/ENSG00000105640/ENSG00000063177/ENSG00000198755/ENSG00000142937/ENSG00000089157/ENSG00000156482/ENSG00000188846/ENSG00000115268/ENSG00000142534/ENSG00000148303/ENSG00000100316/ENSG00000174748/ENSG00000162244/ENSG00000177600/ENSG00000278845/ENSG00000083845/ENSG00000221983/ENSG00000105372/ENSG00000186468/ENSG00000164587/ENSG00000140988/ENSG00000167526/ENSG00000130312/ENSG00000122406…
GO:0003008	BP	GO:0003008	system process	130	-0.298880796912651	-1.69263838714101	0.0013531799729364	0.00848927898302144	0.00582318840940626	454	tags=47%, list=28%, signal=37%	ENSG00000036448/ENSG00000072310/ENSG00000118515/ENSG00000157045/ENSG00000075073/ENSG00000116016/ENSG00000040531/ENSG00000134324/ENSG00000169220/ENSG00000150907/ENSG00000087245/ENSG00000101400/ENSG00000177628/ENSG00000109846/ENSG00000163064/ENSG00000092068/ENSG00000130164/ENSG00000107521/ENSG00000164867/ENSG00000059804/ENSG00000185345/ENSG00000164251/ENSG00000064687/ENSG00000144681/ENSG00000196743…
GO:0010817	BP	GO:0010817	regulation of hormone levels	37	-0.438847038902684	-1.89336564958361	0.00138121546961326	0.0086195852350068	0.00591257148395852	487	tags=62%, list=30%, signal=44%	ENSG00000176928/ENSG00000132196/ENSG00000157326/ENSG00000072310/ENSG00000075073/ENSG00000124766/ENSG00000123836/ENSG00000154309/ENSG00000185950/ENSG00000092068/ENSG00000197635/ENSG00000185345/ENSG00000172893/ENSG00000155093/ENSG00000136689/ENSG00000164266/ENSG00000132170/ENSG00000135047/ENSG00000144891/ENSG00000143387/ENSG00000118785/ENSG00000137869/ENSG00000103316
GO:0002181	BP	GO:0002181	cytoplasmic translation	39	-0.418110384386711	-1.82126200497566	0.00142045454545455	0.00881336782813728	0.00604549591164182	920	tags=97%, list=57%, signal=43%	ENSG00000165525/ENSG00000165819/ENSG00000138668/ENSG00000135829/ENSG00000114867/ENSG00000143486/ENSG00000142676/ENSG00000105640/ENSG00000063177/ENSG00000198755/ENSG00000142937/ENSG00000089157/ENSG00000156482/ENSG00000188846/ENSG00000115268/ENSG00000142534/ENSG00000148303/ENSG00000100316/ENSG00000174748/ENSG00000162244/ENSG00000177600/ENSG00000083845/ENSG00000221983/ENSG00000105372/ENSG00000186468…
GO:0003012	BP	GO:0003012	muscle system process	39	-0.417651540825867	-1.81926331186782	0.00142045454545455	0.00881336782813728	0.00604549591164182	466	tags=59%, list=29%, signal=43%	ENSG00000172164/ENSG00000036448/ENSG00000075073/ENSG00000150907/ENSG00000101400/ENSG00000109846/ENSG00000164867/ENSG00000144681/ENSG00000113163/ENSG00000108984/ENSG00000123700/ENSG00000196562/ENSG00000131730/ENSG00000135124/ENSG00000173511/ENSG00000132170/ENSG00000175538/ENSG00000119508/ENSG00000156804/ENSG00000101605/ENSG00000155962/ENSG00000046604/ENSG00000135914
GO:0042632	BP	GO:0042632	cholesterol homeostasis	12	-0.641321566433884	-2.00504329292929	0.0015511892450879	0.00956937090164542	0.00656407332486299	180	tags=50%, list=11%, signal=45%	ENSG00000073060/ENSG00000119655/ENSG00000141458/ENSG00000186480/ENSG00000025434/ENSG00000121769
GO:0055092	BP	GO:0055092	sterol homeostasis	12	-0.641321566433884	-2.00504329292929	0.0015511892450879	0.00956937090164542	0.00656407332486299	180	tags=50%, list=11%, signal=45%	ENSG00000073060/ENSG00000119655/ENSG00000141458/ENSG00000186480/ENSG00000025434/ENSG00000121769
GO:0017116	MF	GO:0017116	single-stranded DNA helicase activity	16	0.666219483010726	1.97900885149373	0.00156298843388559	0.00961461170901621	0.00659510608343303	519	tags=94%, list=32%, signal=64%	ENSG00000051341/ENSG00000127586/ENSG00000125885/ENSG00000100297/ENSG00000133119/ENSG00000138346/ENSG00000051180/ENSG00000140451/ENSG00000112118/ENSG00000163918/ENSG00000073111/ENSG00000166508/ENSG00000104738/ENSG00000111445/ENSG00000049541
GO:0032504	BP	GO:0032504	multicellular organism reproduction	86	0.424230488170542	1.80059539492291	0.0016139044072005	0.0098972124154163	0.00678895495579195	303	tags=40%, list=19%, signal=34%	ENSG00000066279/ENSG00000131747/ENSG00000121621/ENSG00000112742/ENSG00000137812/ENSG00000121152/ENSG00000136492/ENSG00000170961/ENSG00000080986/ENSG00000185697/ENSG00000158402/ENSG00000100206/ENSG00000187741/ENSG00000105011/ENSG00000087586/ENSG00000144554/ENSG00000157456/ENSG00000125885/ENSG00000166851/ENSG00000154734/ENSG00000139618/ENSG00000266524/ENSG00000071539/ENSG00000161800/ENSG00000164611…
GO:0051050	BP	GO:0051050	positive regulation of transport	95	-0.310177927110706	-1.66055439719721	0.00161812297734628	0.0098972124154163	0.00678895495579195	311	tags=36%, list=19%, signal=31%	ENSG00000185345/ENSG00000164251/ENSG00000064687/ENSG00000144681/ENSG00000205542/ENSG00000250479/ENSG00000119729/ENSG00000108984/ENSG00000123700/ENSG00000168461/ENSG00000170379/ENSG00000131981/ENSG00000137575/ENSG00000103490/ENSG00000148175/ENSG00000135362/ENSG00000169418/ENSG00000078018/ENSG00000118473/ENSG00000164266/ENSG00000135124/ENSG00000132170/ENSG00000119699/ENSG00000119508/ENSG00000025434…
GO:0044391	CC	GO:0044391	ribosomal subunit	33	-0.468542075134298	-1.97057885750793	0.00164690382081686	0.0100447136720077	0.00689013287790685	793	tags=94%, list=49%, signal=49%	ENSG00000142676/ENSG00000105640/ENSG00000063177/ENSG00000198755/ENSG00000142937/ENSG00000089157/ENSG00000156482/ENSG00000188846/ENSG00000115268/ENSG00000142534/ENSG00000148303/ENSG00000100316/ENSG00000174748/ENSG00000162244/ENSG00000177600/ENSG00000278845/ENSG00000083845/ENSG00000221983/ENSG00000105372/ENSG00000186468/ENSG00000164587/ENSG00000140988/ENSG00000167526/ENSG00000130312/ENSG00000122406…
GO:0007019	BP	GO:0007019	microtubule depolymerization	10	0.748704716146698	1.96607142687776	0.00165920026547204	0.0100911247784218	0.00692196839862407	163	tags=60%, list=10%, signal=54%	ENSG00000186185/ENSG00000121621/ENSG00000142945/ENSG00000088325/ENSG00000186638/ENSG00000136108
GO:0045637	BP	GO:0045637	regulation of myeloid cell differentiation	18	-0.569025736149473	-2.00806383680346	0.00169683257918552	0.010290931107004	0.00705902478457312	42	tags=72%, list=3%, signal=71%	ENSG00000143772/ENSG00000169926/ENSG00000128016/ENSG00000180354/ENSG00000187098/ENSG00000172819/ENSG00000155846/ENSG00000138795/ENSG00000204103/ENSG00000122378/ENSG00000006747/ENSG00000163823/ENSG00000185862
GO:0009100	BP	GO:0009100	glycoprotein metabolic process	36	-0.423698543649585	-1.81666549751698	0.00170940170940171	0.0103380389897244	0.00709133825632939	287	tags=36%, list=18%, signal=30%	ENSG00000064687/ENSG00000262406/ENSG00000196562/ENSG00000172986/ENSG00000115525/ENSG00000183828/ENSG00000141458/ENSG00000173511/ENSG00000103154/ENSG00000135047/ENSG00000178301/ENSG00000117643/ENSG00000140297
GO:0070374	BP	GO:0070374	positive regulation of ERK1 and ERK2 cascade	20	-0.538622934501376	-1.96215929465192	0.00173963467671789	0.0104914102492258	0.00719654268446174	303	tags=55%, list=19%, signal=45%	ENSG00000164251/ENSG00000064687/ENSG00000158122/ENSG00000103490/ENSG00000133048/ENSG00000103154/ENSG00000135218/ENSG00000135077/ENSG00000136235/ENSG00000135914/ENSG00000163823
GO:0002761	BP	GO:0002761	regulation of myeloid leukocyte differentiation	10	-0.699706330724377	-2.03871840967267	0.00176100628930818	0.0105906327957556	0.00726460401028924	42	tags=70%, list=3%, signal=69%	ENSG00000187098/ENSG00000155846/ENSG00000138795/ENSG00000204103/ENSG00000122378/ENSG00000163823/ENSG00000185862
GO:0001824	BP	GO:0001824	blastocyst development	12	0.708391931716072	1.94619164492897	0.00179328333876753	0.0107547048143913	0.00737714858317208	185	tags=58%, list=11%, signal=52%	ENSG00000117650/ENSG00000171848/ENSG00000105011/ENSG00000147536/ENSG00000139618/ENSG00000169908/ENSG00000146918
GO:1901617	BP	GO:1901617	organic hydroxy compound biosynthetic process	27	-0.495313674269526	-1.97703920244203	0.00187441424554827	0.0112100385296262	0.00768948300147432	529	tags=78%, list=33%, signal=53%	ENSG00000143772/ENSG00000116133/ENSG00000132196/ENSG00000072310/ENSG00000166228/ENSG00000100979/ENSG00000040531/ENSG00000141447/ENSG00000177628/ENSG00000104763/ENSG00000067064/ENSG00000164211/ENSG00000125629/ENSG00000110921/ENSG00000172893/ENSG00000052802/ENSG00000167508/ENSG00000160285/ENSG00000186480/ENSG00000112972/ENSG00000137869
GO:0016236	BP	GO:0016236	macroautophagy	30	-0.479890113053724	-1.96418976704674	0.00193050193050193	0.0115134921229104	0.00789763583173701	636	tags=77%, list=39%, signal=47%	ENSG00000114573/ENSG00000101421/ENSG00000100568/ENSG00000005893/ENSG00000165861/ENSG00000179364/ENSG00000118804/ENSG00000176046/ENSG00000134108/ENSG00000171130/ENSG00000164938/ENSG00000006715/ENSG00000177628/ENSG00000070540/ENSG00000078804/ENSG00000185345/ENSG00000225190/ENSG00000152137/ENSG00000161011/ENSG00000147416/ENSG00000176428/ENSG00000141458/ENSG00000102445
GO:0098662	BP	GO:0098662	inorganic cation transmembrane transport	51	-0.386661754107772	-1.81236685637976	0.00194476857253987	0.0115665379466252	0.00793402241137957	289	tags=35%, list=18%, signal=30%	ENSG00000164949/ENSG00000144681/ENSG00000205542/ENSG00000123700/ENSG00000147416/ENSG00000148175/ENSG00000171227/ENSG00000135124/ENSG00000166347/ENSG00000136531/ENSG00000175538/ENSG00000055732/ENSG00000072041/ENSG00000155962/ENSG00000089041/ENSG00000135914/ENSG00000138449/ENSG00000166473
GO:0033218	MF	GO:0033218	amide binding	35	-0.438950094985466	-1.86704701198225	0.00203458799593082	0.0120674048353693	0.00827759013568492	422	tags=51%, list=26%, signal=39%	ENSG00000100979/ENSG00000214274/ENSG00000109846/ENSG00000092068/ENSG00000130164/ENSG00000113163/ENSG00000158019/ENSG00000073060/ENSG00000169418/ENSG00000169710/ENSG00000166340/ENSG00000132170/ENSG00000110203/ENSG00000158473/ENSG00000135218/ENSG00000198502/ENSG00000196549/ENSG00000138449
GO:0015267	MF	GO:0015267	channel activity	22	-0.529377435162898	-1.98874864757306	0.00207530388378298	0.012241450032287	0.00839697577201882	160	tags=41%, list=10%, signal=37%	ENSG00000171227/ENSG00000135124/ENSG00000136531/ENSG00000175538/ENSG00000178301/ENSG00000055732/ENSG00000155962/ENSG00000089041/ENSG00000166473
GO:0022803	MF	GO:0022803	passive transmembrane transporter activity	22	-0.529377435162898	-1.98874864757306	0.00207530388378298	0.012241450032287	0.00839697577201882	160	tags=41%, list=10%, signal=37%	ENSG00000171227/ENSG00000135124/ENSG00000136531/ENSG00000175538/ENSG00000178301/ENSG00000055732/ENSG00000155962/ENSG00000089041/ENSG00000166473
GO:0016922	MF	GO:0016922	nuclear receptor binding	13	-0.616130386157139	-1.9757763401728	0.00210526315789474	0.0123504947655242	0.00847177458920498	369	tags=62%, list=23%, signal=48%	ENSG00000172819/ENSG00000070540/ENSG00000155846/ENSG00000138795/ENSG00000132170/ENSG00000119508/ENSG00000169297/ENSG00000109819
GO:0005775	CC	GO:0005775	vacuolar lumen	38	-0.41511268924495	-1.80084066144122	0.00210378681626928	0.0123504947655242	0.00847177458920498	575	tags=63%, list=36%, signal=42%	ENSG00000135677/ENSG00000143162/ENSG00000185339/ENSG00000049860/ENSG00000170266/ENSG00000108828/ENSG00000107798/ENSG00000204386/ENSG00000117984/ENSG00000177628/ENSG00000104763/ENSG00000213614/ENSG00000064601/ENSG00000196743/ENSG00000137575/ENSG00000103490/ENSG00000030582/ENSG00000106809/ENSG00000076716/ENSG00000119655/ENSG00000166340/ENSG00000135047/ENSG00000087086/ENSG00000143387
GO:0045740	BP	GO:0045740	positive regulation of DNA replication	12	0.705500734664041	1.93824855114913	0.00211933485490708	0.0123656583810703	0.00848217601322101	325	tags=75%, list=20%, signal=60%	ENSG00000170312/ENSG00000129173/ENSG00000161692/ENSG00000176208/ENSG00000167513/ENSG00000138346/ENSG00000123374/ENSG00000097046/ENSG00000006634
GO:0032153	CC	GO:0032153	cell division site	12	0.705237225680091	1.93752460306337	0.00211933485490708	0.0123656583810703	0.00848217601322101	281	tags=67%, list=17%, signal=55%	ENSG00000011426/ENSG00000138180/ENSG00000142731/ENSG00000112984/ENSG00000122966/ENSG00000161800/ENSG00000114346/ENSG00000120539
GO:0046873	MF	GO:0046873	metal ion transmembrane transporter activity	17	-0.567153308593952	-1.96933915757546	0.00222593210907067	0.0129525184617004	0.00888473043819674	160	tags=47%, list=10%, signal=43%	ENSG00000171227/ENSG00000135124/ENSG00000136531/ENSG00000175538/ENSG00000055732/ENSG00000072041/ENSG00000138449/ENSG00000166473
GO:0046879	BP	GO:0046879	hormone secretion	19	-0.547474700004201	-1.96585869992323	0.00228767515012868	0.0132402274145889	0.00908208329267272	452	tags=68%, list=28%, signal=50%	ENSG00000072310/ENSG00000075073/ENSG00000124766/ENSG00000123836/ENSG00000185950/ENSG00000185345/ENSG00000155093/ENSG00000136689/ENSG00000164266/ENSG00000132170/ENSG00000144891/ENSG00000118785/ENSG00000137869
GO:0005882	CC	GO:0005882	intermediate filament	12	0.7040531486716	1.93427154401837	0.00228236061297685	0.0132402274145889	0.00908208329267272	327	tags=75%, list=20%, signal=60%	ENSG00000186847/ENSG00000113368/ENSG00000186832/ENSG00000171346/ENSG00000167768/ENSG00000205426/ENSG00000138587/ENSG00000131737/ENSG00000148798
GO:0045859	BP	GO:0045859	regulation of protein kinase activity	74	0.436914062450799	1.80914218288604	0.00229504016320286	0.0132472425506052	0.00908689529835927	325	tags=42%, list=20%, signal=35%	ENSG00000138778/ENSG00000118193/ENSG00000158402/ENSG00000197299/ENSG00000127564/ENSG00000088325/ENSG00000092853/ENSG00000145386/ENSG00000157456/ENSG00000166851/ENSG00000100526/ENSG00000094804/ENSG00000162063/ENSG00000146918/ENSG00000161692/ENSG00000114346/ENSG00000149503/ENSG00000106462/ENSG00000065361/ENSG00000175305/ENSG00000134057/ENSG00000123080/ENSG00000134222/ENSG00000150630/ENSG00000136122…
GO:0007163	BP	GO:0007163	establishment or maintenance of cell polarity	17	0.637820665917795	1.92296141876013	0.00234082397003745	0.0134753850467664	0.00924338876994806	372	tags=65%, list=23%, signal=50%	ENSG00000138182/ENSG00000142945/ENSG00000080986/ENSG00000115163/ENSG00000186193/ENSG00000166851/ENSG00000164109/ENSG00000154928/ENSG00000040275/ENSG00000121957/ENSG00000159753
GO:0099503	CC	GO:0099503	secretory vesicle	114	-0.280095774580546	-1.54882075826691	0.00244798041615667	0.0140546715626275	0.0096407481371728	375	tags=37%, list=23%, signal=30%	ENSG00000104763/ENSG00000167658/ENSG00000213614/ENSG00000138413/ENSG00000125354/ENSG00000119899/ENSG00000064601/ENSG00000059804/ENSG00000175471/ENSG00000205542/ENSG00000196743/ENSG00000168461/ENSG00000137501/ENSG00000160213/ENSG00000167994/ENSG00000131981/ENSG00000137575/ENSG00000135245/ENSG00000155093/ENSG00000103490/ENSG00000030582/ENSG00000148175/ENSG00000164713/ENSG00000119655/ENSG00000166900…
GO:2000779	BP	GO:2000779	regulation of double-strand break repair	20	0.616704503044992	1.93330484528798	0.00259383582545011	0.0148524695005162	0.0101879945775658	599	tags=95%, list=37%, signal=60%	ENSG00000051341/ENSG00000111247/ENSG00000127423/ENSG00000111602/ENSG00000181544/ENSG00000051180/ENSG00000109685/ENSG00000149948/ENSG00000185480/ENSG00000089280/ENSG00000132436/ENSG00000133302/ENSG00000111206/ENSG00000175643/ENSG00000013573/ENSG00000141499/ENSG00000112983/ENSG00000136518/ENSG00000155816
GO:0051129	BP	GO:0051129	negative regulation of cellular component organization	83	0.417711509980579	1.76462340874669	0.0026116154707126	0.0149146103672261	0.0102306198671221	292	tags=36%, list=18%, signal=31%	ENSG00000131747/ENSG00000117724/ENSG00000112742/ENSG00000118193/ENSG00000156970/ENSG00000156509/ENSG00000178999/ENSG00000135476/ENSG00000169679/ENSG00000080986/ENSG00000088325/ENSG00000012048/ENSG00000166851/ENSG00000164109/ENSG00000186638/ENSG00000136108/ENSG00000162063/ENSG00000122952/ENSG00000184445/ENSG00000071539/ENSG00000164611/ENSG00000138623/ENSG00000134057/ENSG00000167513/ENSG00000112029…
GO:0061351	BP	GO:0061351	neural precursor cell proliferation	14	0.664090366594036	1.90912622945465	0.00269370939629219	0.0153022594464831	0.0104965262685681	250	tags=57%, list=15%, signal=49%	ENSG00000066279/ENSG00000118193/ENSG00000171241/ENSG00000075702/ENSG00000161800/ENSG00000154928/ENSG00000165304/ENSG00000150630
GO:0051298	BP	GO:0051298	centrosome duplication	23	0.580478334908195	1.88408683636816	0.00269018083993424	0.0153022594464831	0.0104965262685681	411	tags=61%, list=25%, signal=46%	ENSG00000080986/ENSG00000142731/ENSG00000075702/ENSG00000012048/ENSG00000139618/ENSG00000162063/ENSG00000156876/ENSG00000123473/ENSG00000178295/ENSG00000151849/ENSG00000123374/ENSG00000112877/ENSG00000166004/ENSG00000103995
GO:0098660	BP	GO:0098660	inorganic ion transmembrane transport	53	-0.373140619399441	-1.7705824273019	0.0027602523659306	0.0156390087996015	0.0107275181977857	289	tags=34%, list=18%, signal=29%	ENSG00000164949/ENSG00000144681/ENSG00000205542/ENSG00000123700/ENSG00000147416/ENSG00000148175/ENSG00000171227/ENSG00000135124/ENSG00000166347/ENSG00000136531/ENSG00000175538/ENSG00000055732/ENSG00000072041/ENSG00000155962/ENSG00000089041/ENSG00000135914/ENSG00000138449/ENSG00000166473
GO:0045444	BP	GO:0045444	fat cell differentiation	26	-0.489932120117642	-1.92638925560398	0.00281337918099406	0.0158981768416804	0.0109052935237869	140	tags=73%, list=9%, signal=68%	ENSG00000130881/ENSG00000068903/ENSG00000128016/ENSG00000069667/ENSG00000072310/ENSG00000150907/ENSG00000152518/ENSG00000091039/ENSG00000221869/ENSG00000163624/ENSG00000186480/ENSG00000132170/ENSG00000119508/ENSG00000161642/ENSG00000137193/ENSG00000204103/ENSG00000109819/ENSG00000099953/ENSG00000121769
GO:0072657	BP	GO:0072657	protein localization to membrane	58	-0.359868039289844	-1.74386847643231	0.00286415711947627	0.0161427494194566	0.0110730571469419	630	tags=62%, list=39%, signal=39%	ENSG00000161835/ENSG00000101421/ENSG00000100568/ENSG00000117280/ENSG00000143545/ENSG00000179364/ENSG00000174705/ENSG00000099864/ENSG00000144746/ENSG00000153786/ENSG00000187446/ENSG00000204628/ENSG00000164615/ENSG00000168890/ENSG00000105327/ENSG00000118508/ENSG00000166289/ENSG00000185345/ENSG00000157227/ENSG00000161011/ENSG00000144681/ENSG00000119729/ENSG00000168461/ENSG00000278771/ENSG00000170379…
GO:0000018	BP	GO:0000018	regulation of DNA recombination	24	0.56728211682503	1.85751187693806	0.00297707651086633	0.0167353674357577	0.0114795612058416	594	tags=83%, list=37%, signal=53%	ENSG00000051341/ENSG00000197299/ENSG00000111247/ENSG00000176208/ENSG00000111602/ENSG00000181544/ENSG00000168685/ENSG00000051180/ENSG00000109685/ENSG00000185480/ENSG00000089280/ENSG00000182481/ENSG00000132436/ENSG00000175643/ENSG00000141499/ENSG00000169621/ENSG00000095002/ENSG00000020922/ENSG00000112983/ENSG00000136518
GO:0046605	BP	GO:0046605	regulation of centrosome cycle	15	0.650355847960452	1.90106257169822	0.00299921073401736	0.0168158872665088	0.0115347934754012	293	tags=60%, list=18%, signal=50%	ENSG00000142731/ENSG00000075702/ENSG00000012048/ENSG00000087586/ENSG00000162063/ENSG00000156876/ENSG00000123473/ENSG00000178295/ENSG00000151849
GO:0032370	BP	GO:0032370	positive regulation of lipid transport	12	-0.630814787716071	-1.97219464522891	0.0031023784901758	0.017289284337659	0.0118595183835214	287	tags=67%, list=18%, signal=55%	ENSG00000064687/ENSG00000108984/ENSG00000135124/ENSG00000025434/ENSG00000118785/ENSG00000137869/ENSG00000089041/ENSG00000121769
GO:1905477	BP	GO:1905477	positive regulation of protein localization to membrane	12	-0.628795556908113	-1.96588167307847	0.0031023784901758	0.017289284337659	0.0118595183835214	531	tags=92%, list=33%, signal=62%	ENSG00000187446/ENSG00000204628/ENSG00000105327/ENSG00000185345/ENSG00000161011/ENSG00000144681/ENSG00000170379/ENSG00000131981/ENSG00000148175/ENSG00000166900/ENSG00000103154
GO:0002683	BP	GO:0002683	negative regulation of immune system process	37	-0.413073972118246	-1.78217009621701	0.00310773480662983	0.017289284337659	0.0118595183835214	363	tags=46%, list=22%, signal=36%	ENSG00000157873/ENSG00000158747/ENSG00000130164/ENSG00000197635/ENSG00000262406/ENSG00000153064/ENSG00000131981/ENSG00000030582/ENSG00000137507/ENSG00000132170/ENSG00000119699/ENSG00000025434/ENSG00000137869/ENSG00000135077/ENSG00000204103/ENSG00000151882/ENSG00000136235
GO:0005216	MF	GO:0005216	ion channel activity	19	-0.541848914752433	-1.9456577684811	0.00314555333142694	0.0174545781509335	0.011972901041758	160	tags=42%, list=10%, signal=38%	ENSG00000171227/ENSG00000135124/ENSG00000136531/ENSG00000175538/ENSG00000055732/ENSG00000155962/ENSG00000089041/ENSG00000166473
GO:0005996	BP	GO:0005996	monosaccharide metabolic process	20	-0.528894753303911	-1.92672032624941	0.00318933024064946	0.0175169081839752	0.0120156560892352	505	tags=75%, list=31%, signal=52%	ENSG00000170266/ENSG00000079739/ENSG00000069667/ENSG00000123836/ENSG00000150907/ENSG00000185950/ENSG00000059804/ENSG00000185345/ENSG00000111674/ENSG00000175264/ENSG00000114268/ENSG00000109107/ENSG00000173281/ENSG00000102445/ENSG00000109819
GO:0002573	BP	GO:0002573	myeloid leukocyte differentiation	20	-0.5251684751176	-1.91314579960119	0.00318933024064946	0.0175169081839752	0.0120156560892352	389	tags=65%, list=24%, signal=50%	ENSG00000187098/ENSG00000177628/ENSG00000155846/ENSG00000164251/ENSG00000138795/ENSG00000137265/ENSG00000169710/ENSG00000086300/ENSG00000132170/ENSG00000204103/ENSG00000122378/ENSG00000163823/ENSG00000185862
GO:0051347	BP	GO:0051347	positive regulation of transferase activity	74	0.424459253316974	1.75757020908092	0.00318755578222619	0.0175169081839752	0.0120156560892352	393	tags=46%, list=24%, signal=36%	ENSG00000138778/ENSG00000117650/ENSG00000118193/ENSG00000178999/ENSG00000117399/ENSG00000175063/ENSG00000088325/ENSG00000127586/ENSG00000092853/ENSG00000166851/ENSG00000147536/ENSG00000094804/ENSG00000161692/ENSG00000154928/ENSG00000133119/ENSG00000114346/ENSG00000149503/ENSG00000106462/ENSG00000065361/ENSG00000134057/ENSG00000131153/ENSG00000134222/ENSG00000150630/ENSG00000136122/ENSG00000120539…
GO:0031399	BP	GO:0031399	regulation of protein modification process	170	0.340700426073507	1.5855849613406	0.00316957210776545	0.0175169081839752	0.0120156560892352	340	tags=32%, list=21%, signal=29%	ENSG00000138778/ENSG00000183856/ENSG00000112742/ENSG00000118193/ENSG00000156970/ENSG00000168078/ENSG00000117399/ENSG00000175063/ENSG00000158402/ENSG00000197299/ENSG00000127564/ENSG00000088325/ENSG00000184661/ENSG00000092853/ENSG00000145386/ENSG00000012048/ENSG00000140525/ENSG00000157456/ENSG00000166851/ENSG00000164109/ENSG00000100526/ENSG00000094804/ENSG00000266524/ENSG00000162063/ENSG00000146918…
GO:0000792	CC	GO:0000792	heterochromatin	20	0.6031594699489	1.89084256718726	0.00320415013732072	0.0175535247980954	0.0120407731154707	354	tags=60%, list=22%, signal=47%	ENSG00000171320/ENSG00000154920/ENSG00000115163/ENSG00000119969/ENSG00000276043/ENSG00000149503/ENSG00000106462/ENSG00000092470/ENSG00000101945/ENSG00000151503/ENSG00000149948/ENSG00000130816
GO:0007155	BP	GO:0007155	cell adhesion	99	-0.297291803937297	-1.6090019893197	0.00321543408360129	0.0175706334568365	0.0120525087344179	229	tags=28%, list=14%, signal=26%	ENSG00000131981/ENSG00000008277/ENSG00000103490/ENSG00000206384/ENSG00000076716/ENSG00000136689/ENSG00000134028/ENSG00000115963/ENSG00000137507/ENSG00000103855/ENSG00000166900/ENSG00000184916/ENSG00000110203/ENSG00000171877/ENSG00000119508/ENSG00000153094/ENSG00000158473/ENSG00000135218/ENSG00000118785/ENSG00000135077/ENSG00000046604/ENSG00000198502/ENSG00000151882/ENSG00000136235/ENSG00000159674…
GO:0060401	BP	GO:0060401	cytosolic calcium ion transport	10	-0.685002256781918	-1.99587548410896	0.00327044025157233	0.0177469554519546	0.0121734561317585	134	tags=50%, list=8%, signal=46%	ENSG00000135124/ENSG00000055732/ENSG00000155962/ENSG00000089041/ENSG00000135914
GO:0019722	BP	GO:0019722	calcium-mediated signaling	15	-0.570615074311746	-1.90527084146526	0.00327242977911099	0.0177469554519546	0.0121734561317585	134	tags=40%, list=8%, signal=37%	ENSG00000135124/ENSG00000144891/ENSG00000155962/ENSG00000089041/ENSG00000135914/ENSG00000163823
GO:0005261	MF	GO:0005261	cation channel activity	15	-0.567737862330023	-1.8956638956619	0.00327242977911099	0.0177469554519546	0.0121734561317585	160	tags=53%, list=10%, signal=48%	ENSG00000123700/ENSG00000171227/ENSG00000135124/ENSG00000136531/ENSG00000175538/ENSG00000055732/ENSG00000089041/ENSG00000166473
GO:0051047	BP	GO:0051047	positive regulation of secretion	27	-0.477142745729823	-1.90451013665206	0.00343642611683849	0.0185081275398562	0.0126955792106086	431	tags=67%, list=27%, signal=50%	ENSG00000075073/ENSG00000124766/ENSG00000123836/ENSG00000214274/ENSG00000185950/ENSG00000164251/ENSG00000108984/ENSG00000137575/ENSG00000169418/ENSG00000164266/ENSG00000135124/ENSG00000132170/ENSG00000119699/ENSG00000101605/ENSG00000118785/ENSG00000137869/ENSG00000089041/ENSG00000006747
GO:0043202	CC	GO:0043202	lysosomal lumen	26	-0.476085096504986	-1.87194343257219	0.0034385745545483	0.0185081275398562	0.0126955792106086	807	tags=96%, list=50%, signal=49%	ENSG00000105223/ENSG00000054983/ENSG00000151176/ENSG00000138760/ENSG00000109323/ENSG00000197746/ENSG00000005893/ENSG00000135677/ENSG00000185339/ENSG00000049860/ENSG00000170266/ENSG00000107798/ENSG00000204386/ENSG00000117984/ENSG00000177628/ENSG00000104763/ENSG00000213614/ENSG00000064601/ENSG00000196743/ENSG00000106809/ENSG00000076716/ENSG00000119655/ENSG00000166340/ENSG00000135047/ENSG00000143387
GO:0016491	MF	GO:0016491	oxidoreductase activity	64	-0.338314024632378	-1.66971008714291	0.00343200343200343	0.0185081275398562	0.0126955792106086	352	tags=39%, list=22%, signal=32%	ENSG00000138413/ENSG00000147485/ENSG00000129521/ENSG00000164867/ENSG00000143198/ENSG00000166816/ENSG00000151790/ENSG00000090013/ENSG00000167468/ENSG00000172893/ENSG00000052802/ENSG00000175287/ENSG00000156869/ENSG00000169710/ENSG00000134824/ENSG00000166347/ENSG00000149485/ENSG00000167996/ENSG00000211445/ENSG00000137869/ENSG00000155962/ENSG00000189221/ENSG00000103316/ENSG00000099194/ENSG00000087076
GO:0032640	BP	GO:0032640	tumor necrosis factor production	14	-0.591931454481034	-1.93028460637373	0.00352208073692766	0.0187699005609041	0.0128751414119581	212	tags=43%, list=13%, signal=38%	ENSG00000103490/ENSG00000102575/ENSG00000135218/ENSG00000135077/ENSG00000136235/ENSG00000159674
GO:0032680	BP	GO:0032680	regulation of tumor necrosis factor production	14	-0.591931454481034	-1.93028460637373	0.00352208073692766	0.0187699005609041	0.0128751414119581	212	tags=43%, list=13%, signal=38%	ENSG00000103490/ENSG00000102575/ENSG00000135218/ENSG00000135077/ENSG00000136235/ENSG00000159674
GO:0071706	BP	GO:0071706	tumor necrosis factor superfamily cytokine production	14	-0.591931454481034	-1.93028460637373	0.00352208073692766	0.0187699005609041	0.0128751414119581	212	tags=43%, list=13%, signal=38%	ENSG00000103490/ENSG00000102575/ENSG00000135218/ENSG00000135077/ENSG00000136235/ENSG00000159674
GO:1903555	BP	GO:1903555	regulation of tumor necrosis factor superfamily cytokine production	14	-0.591931454481034	-1.93028460637373	0.00352208073692766	0.0187699005609041	0.0128751414119581	212	tags=43%, list=13%, signal=38%	ENSG00000103490/ENSG00000102575/ENSG00000135218/ENSG00000135077/ENSG00000136235/ENSG00000159674
GO:0000794	CC	GO:0000794	condensed nuclear chromosome	17	0.622716380492037	1.87742360588623	0.00358926342072409	0.0190807015921456	0.0130883341891511	310	tags=65%, list=19%, signal=53%	ENSG00000117650/ENSG00000100206/ENSG00000197299/ENSG00000012048/ENSG00000166851/ENSG00000139618/ENSG00000149503/ENSG00000101945/ENSG00000188486/ENSG00000131470/ENSG00000051180
GO:0032963	BP	GO:0032963	collagen metabolic process	13	-0.606077218714906	-1.94353834181657	0.00368421052631579	0.0194892021207811	0.0133685435624494	309	tags=69%, list=19%, signal=56%	ENSG00000157227/ENSG00000262406/ENSG00000124299/ENSG00000102996/ENSG00000119699/ENSG00000135047/ENSG00000143387/ENSG00000089041/ENSG00000099953
GO:0019318	BP	GO:0019318	hexose metabolic process	18	-0.543388194261366	-1.91759021239692	0.00367647058823529	0.0194892021207811	0.0133685435624494	505	tags=78%, list=31%, signal=54%	ENSG00000170266/ENSG00000079739/ENSG00000069667/ENSG00000123836/ENSG00000150907/ENSG00000185950/ENSG00000185345/ENSG00000111674/ENSG00000175264/ENSG00000114268/ENSG00000109107/ENSG00000173281/ENSG00000102445/ENSG00000109819
GO:0010959	BP	GO:0010959	regulation of metal ion transport	26	-0.471132194477364	-1.85246886281388	0.00375117224132541	0.0197947888126804	0.0135781595835386	318	tags=46%, list=20%, signal=38%	ENSG00000164867/ENSG00000164949/ENSG00000144681/ENSG00000123700/ENSG00000131981/ENSG00000148175/ENSG00000164266/ENSG00000135124/ENSG00000175538/ENSG00000155962/ENSG00000089041/ENSG00000163823
GO:0098655	BP	GO:0098655	cation transmembrane transport	61	-0.343128463124728	-1.67919245040593	0.00376096949435855	0.0197979641108899	0.0135803376671858	289	tags=31%, list=18%, signal=27%	ENSG00000164949/ENSG00000144681/ENSG00000205542/ENSG00000123700/ENSG00000174899/ENSG00000147416/ENSG00000148175/ENSG00000171227/ENSG00000135124/ENSG00000166347/ENSG00000136531/ENSG00000175538/ENSG00000055732/ENSG00000072041/ENSG00000155962/ENSG00000089041/ENSG00000135914/ENSG00000138449/ENSG00000166473
GO:1902533	BP	GO:1902533	positive regulation of intracellular signal transduction	96	-0.299476758967737	-1.60453594787917	0.0037817396002161	0.0198587447786958	0.0136220299335127	314	tags=33%, list=19%, signal=29%	ENSG00000166289/ENSG00000185345/ENSG00000164251/ENSG00000179046/ENSG00000064687/ENSG00000108984/ENSG00000153064/ENSG00000137575/ENSG00000158122/ENSG00000103490/ENSG00000116954/ENSG00000198915/ENSG00000083750/ENSG00000169083/ENSG00000129946/ENSG00000135362/ENSG00000169418/ENSG00000204397/ENSG00000139946/ENSG00000135124/ENSG00000133048/ENSG00000103154/ENSG00000119699/ENSG00000153094/ENSG00000161642…
GO:0051785	BP	GO:0051785	positive regulation of nuclear division	10	0.721684138793762	1.89511637086481	0.0038161606105857	0.0199422179480364	0.0136792880343683	237	tags=60%, list=15%, signal=52%	ENSG00000137804/ENSG00000126787/ENSG00000135476/ENSG00000111247/ENSG00000087586/ENSG00000167513
GO:0015711	BP	GO:0015711	organic anion transport	29	-0.454191752428296	-1.8480274891397	0.00381194409148666	0.0199422179480364	0.0136792880343683	337	tags=55%, list=21%, signal=44%	ENSG00000092068/ENSG00000169100/ENSG00000119899/ENSG00000059804/ENSG00000164300/ENSG00000113163/ENSG00000108984/ENSG00000139974/ENSG00000174899/ENSG00000155465/ENSG00000135124/ENSG00000110203/ENSG00000173930/ENSG00000135218/ENSG00000072041/ENSG00000089041
GO:0006091	BP	GO:0006091	generation of precursor metabolites and energy	41	-0.394087964329768	-1.74104458422722	0.00397111913357401	0.0207017421176388	0.0142002807299715	670	tags=80%, list=42%, signal=48%	ENSG00000142657/ENSG00000100504/ENSG00000127184/ENSG00000163931/ENSG00000142192/ENSG00000104687/ENSG00000081760/ENSG00000118804/ENSG00000176046/ENSG00000130313/ENSG00000197894/ENSG00000079739/ENSG00000115944/ENSG00000136003/ENSG00000123836/ENSG00000177628/ENSG00000138413/ENSG00000105373/ENSG00000185950/ENSG00000131069/ENSG00000111674/ENSG00000250479/ENSG00000158122/ENSG00000113552/ENSG00000166347…
GO:0006271	BP	GO:0006271	DNA strand elongation involved in DNA replication	10	0.716957605985037	1.88270466715435	0.0039820806371329	0.0207087430235438	0.0142050829745677	464	tags=100%, list=29%, signal=72%	ENSG00000133119/ENSG00000138346/ENSG00000101868/ENSG00000105486/ENSG00000101003/ENSG00000112118/ENSG00000163918/ENSG00000166508/ENSG00000177084/ENSG00000104738
GO:0051493	BP	GO:0051493	regulation of cytoskeleton organization	65	0.429073653012301	1.73341921797764	0.00402127383577637	0.0208621748636783	0.0143103289577533	415	tags=49%, list=26%, signal=38%	ENSG00000183856/ENSG00000121621/ENSG00000154839/ENSG00000163808/ENSG00000076382/ENSG00000088325/ENSG00000165480/ENSG00000142731/ENSG00000013810/ENSG00000012048/ENSG00000122966/ENSG00000166851/ENSG00000136108/ENSG00000162063/ENSG00000077264/ENSG00000114346/ENSG00000156876/ENSG00000123473/ENSG00000134222/ENSG00000136122/ENSG00000119397/ENSG00000117632/ENSG00000151849/ENSG00000115355/ENSG00000118523…
GO:0051046	BP	GO:0051046	regulation of secretion	46	-0.387712092519832	-1.7741335206228	0.00408769973987365	0.0211558113941057	0.014511747811343	470	tags=59%, list=29%, signal=43%	ENSG00000185896/ENSG00000072310/ENSG00000118515/ENSG00000075073/ENSG00000124766/ENSG00000123836/ENSG00000214274/ENSG00000154309/ENSG00000185950/ENSG00000175471/ENSG00000185345/ENSG00000164251/ENSG00000129158/ENSG00000108984/ENSG00000137575/ENSG00000169418/ENSG00000164266/ENSG00000135124/ENSG00000132170/ENSG00000119699/ENSG00000025434/ENSG00000101605/ENSG00000144891/ENSG00000118785/ENSG00000137869…
GO:0033344	BP	GO:0033344	cholesterol efflux	12	-0.613223550938562	-1.91719697610138	0.00413650465356774	0.0213570611969576	0.0146497943429396	287	tags=58%, list=18%, signal=48%	ENSG00000064687/ENSG00000073060/ENSG00000119655/ENSG00000141458/ENSG00000132170/ENSG00000025434/ENSG00000122547
GO:0022626	CC	GO:0022626	cytosolic ribosome	30	-0.462058696377324	-1.89120579589372	0.00418275418275418	0.0215441860178702	0.0147781518972655	793	tags=93%, list=49%, signal=48%	ENSG00000142676/ENSG00000105640/ENSG00000063177/ENSG00000198755/ENSG00000142937/ENSG00000089157/ENSG00000156482/ENSG00000188846/ENSG00000115268/ENSG00000142534/ENSG00000148303/ENSG00000100316/ENSG00000174748/ENSG00000162244/ENSG00000177600/ENSG00000083845/ENSG00000221983/ENSG00000105372/ENSG00000186468/ENSG00000164587/ENSG00000140988/ENSG00000167526/ENSG00000122406/ENSG00000147403/ENSG00000108107…
GO:0043596	CC	GO:0043596	nuclear replication fork	12	0.680618704970536	1.86988922048726	0.00423866970981415	0.02178008564494	0.0149399663430957	429	tags=83%, list=27%, signal=62%	ENSG00000065328/ENSG00000198056/ENSG00000111602/ENSG00000146263/ENSG00000014138/ENSG00000101868/ENSG00000062822/ENSG00000160949/ENSG00000112118/ENSG00000198554
GO:0032934	MF	GO:0032934	sterol binding	11	-0.640337021813934	-1.94101981452351	0.00431800863601727	0.02213493474606	0.0151833737251434	461	tags=82%, list=29%, signal=59%	ENSG00000069667/ENSG00000141447/ENSG00000091039/ENSG00000164211/ENSG00000125629/ENSG00000119655/ENSG00000141458/ENSG00000186480/ENSG00000025434
GO:0044818	BP	GO:0044818	mitotic G2/M transition checkpoint	16	0.630705677617272	1.8735148858921	0.00437636761487965	0.0223277712673836	0.0153156491984938	201	tags=50%, list=12%, signal=44%	ENSG00000170312/ENSG00000197299/ENSG00000092853/ENSG00000012048/ENSG00000143476/ENSG00000166851/ENSG00000094804/ENSG00000085840
GO:0042391	BP	GO:0042391	regulation of membrane potential	27	-0.459534103509286	-1.83422543065617	0.00437363323961262	0.0223277712673836	0.0153156491984938	134	tags=48%, list=8%, signal=45%	ENSG00000040531/ENSG00000101400/ENSG00000177628/ENSG00000185345/ENSG00000250479/ENSG00000123700/ENSG00000135124/ENSG00000136531/ENSG00000175538/ENSG00000135218/ENSG00000046604/ENSG00000089041/ENSG00000004846
GO:0006334	BP	GO:0006334	nucleosome assembly	14	0.644261784117497	1.85212304313678	0.00443669782918713	0.022582057745248	0.0154900760342156	550	tags=93%, list=34%, signal=62%	ENSG00000123485/ENSG00000105011/ENSG00000104147/ENSG00000188486/ENSG00000164104/ENSG00000167670/ENSG00000159055/ENSG00000073111/ENSG00000159259/ENSG00000203760/ENSG00000132780/ENSG00000184205/ENSG00000085224
GO:0003684	MF	GO:0003684	damaged DNA binding	16	0.62727838732399	1.86333410013004	0.00468896530165677	0.0238097695624222	0.0163322202537846	318	tags=56%, list=20%, signal=46%	ENSG00000109674/ENSG00000051341/ENSG00000197299/ENSG00000012048/ENSG00000127423/ENSG00000160957/ENSG00000188486/ENSG00000164104/ENSG00000062822
GO:0016773	MF	GO:0016773	phosphotransferase activity, alcohol group as acceptor	62	0.433877766142314	1.73718859959115	0.00470219435736677	0.0238207634150839	0.0163397614449178	298	tags=35%, list=18%, signal=30%	ENSG00000117650/ENSG00000112742/ENSG00000170312/ENSG00000156970/ENSG00000178999/ENSG00000168078/ENSG00000169679/ENSG00000127564/ENSG00000142731/ENSG00000087586/ENSG00000122966/ENSG00000166851/ENSG00000077264/ENSG00000154928/ENSG00000165304/ENSG00000065361/ENSG00000177602/ENSG00000163673/ENSG00000120539/ENSG00000123374/ENSG00000097046/ENSG00000060140
GO:0038023	MF	GO:0038023	signaling receptor activity	54	-0.361158838989274	-1.71820979445995	0.0047713717693837	0.0240579939566349	0.0165024888264399	467	tags=57%, list=29%, signal=42%	ENSG00000004399/ENSG00000069667/ENSG00000072310/ENSG00000075073/ENSG00000157873/ENSG00000115594/ENSG00000172819/ENSG00000103043/ENSG00000158292/ENSG00000164251/ENSG00000186907/ENSG00000064687/ENSG00000155093/ENSG00000076716/ENSG00000126860/ENSG00000169083/ENSG00000073060/ENSG00000169418/ENSG00000187957/ENSG00000141458/ENSG00000135124/ENSG00000158270/ENSG00000132170/ENSG00000110203/ENSG00000119508…
GO:0060089	MF	GO:0060089	molecular transducer activity	54	-0.361158838989274	-1.71820979445995	0.0047713717693837	0.0240579939566349	0.0165024888264399	467	tags=57%, list=29%, signal=42%	ENSG00000004399/ENSG00000069667/ENSG00000072310/ENSG00000075073/ENSG00000157873/ENSG00000115594/ENSG00000172819/ENSG00000103043/ENSG00000158292/ENSG00000164251/ENSG00000186907/ENSG00000064687/ENSG00000155093/ENSG00000076716/ENSG00000126860/ENSG00000169083/ENSG00000073060/ENSG00000169418/ENSG00000187957/ENSG00000141458/ENSG00000135124/ENSG00000158270/ENSG00000132170/ENSG00000110203/ENSG00000119508…
GO:0051668	BP	GO:0051668	localization within membrane	66	-0.334157577332768	-1.65987688865709	0.00483091787439614	0.0243013228588198	0.0166693993550855	630	tags=70%, list=39%, signal=44%	ENSG00000163812/ENSG00000196531/ENSG00000157538/ENSG00000108219/ENSG00000136247/ENSG00000112335/ENSG00000197746/ENSG00000161835/ENSG00000101421/ENSG00000100568/ENSG00000117280/ENSG00000143545/ENSG00000179364/ENSG00000174705/ENSG00000099864/ENSG00000144746/ENSG00000175220/ENSG00000006451/ENSG00000153786/ENSG00000187446/ENSG00000204628/ENSG00000164615/ENSG00000168890/ENSG00000105327/ENSG00000118508…
GO:1901566	BP	GO:1901566	organonitrogen compound biosynthetic process	165	-0.241533627499378	-1.43021779238251	0.00489795918367347	0.0245811331525617	0.0168613341545672	921	tags=81%, list=57%, signal=39%	ENSG00000086598/ENSG00000165525/ENSG00000204394/ENSG00000102580/ENSG00000156256/ENSG00000100596/ENSG00000140598/ENSG00000165819/ENSG00000172269/ENSG00000099810/ENSG00000067900/ENSG00000198843/ENSG00000129245/ENSG00000006530/ENSG00000138668/ENSG00000118246/ENSG00000136937/ENSG00000148154/ENSG00000135829/ENSG00000126821/ENSG00000114867/ENSG00000129351/ENSG00000158669/ENSG00000143486/ENSG00000123989…
GO:0031902	CC	GO:0031902	late endosome membrane	20	-0.51298056024974	-1.86874622262711	0.00492896491736735	0.0246792127141672	0.0169286114542629	730	tags=90%, list=45%, signal=50%	ENSG00000138760/ENSG00000154265/ENSG00000165406/ENSG00000101421/ENSG00000100568/ENSG00000005893/ENSG00000149357/ENSG00000134108/ENSG00000188186/ENSG00000185896/ENSG00000006715/ENSG00000189067/ENSG00000103043/ENSG00000225190/ENSG00000176428/ENSG00000141458/ENSG00000055732/ENSG00000198502
GO:0034220	BP	GO:0034220	ion transmembrane transport	69	-0.322609105652282	-1.61585135529032	0.0049683830171635	0.0248188599442066	0.0170244019369408	337	tags=33%, list=21%, signal=28%	ENSG00000092068/ENSG00000169100/ENSG00000119899/ENSG00000164949/ENSG00000144681/ENSG00000205542/ENSG00000123700/ENSG00000174899/ENSG00000170379/ENSG00000147416/ENSG00000148175/ENSG00000171227/ENSG00000135124/ENSG00000166347/ENSG00000136531/ENSG00000175538/ENSG00000055732/ENSG00000072041/ENSG00000155962/ENSG00000089041/ENSG00000135914/ENSG00000138449/ENSG00000166473
GO:0022600	BP	GO:0022600	digestive system process	13	-0.590523151915562	-1.89366033244377	0.005	0.0249189814814815	0.0170930799220273	180	tags=46%, list=11%, signal=41%	ENSG00000073060/ENSG00000164266/ENSG00000086300/ENSG00000025434/ENSG00000135218/ENSG00000140297
GO:0019882	BP	GO:0019882	antigen processing and presentation	12	-0.605269384703103	-1.89232887794911	0.00517063081695967	0.0257037797569304	0.0176314092937508	390	tags=67%, list=24%, signal=51%	ENSG00000117984/ENSG00000177628/ENSG00000118508/ENSG00000103490/ENSG00000135047/ENSG00000158473/ENSG00000198502/ENSG00000134594
GO:0046883	BP	GO:0046883	regulation of hormone secretion	15	-0.562073357540274	-1.87675024214466	0.00518134715025907	0.0257037797569304	0.0176314092937508	452	tags=73%, list=28%, signal=53%	ENSG00000072310/ENSG00000075073/ENSG00000124766/ENSG00000123836/ENSG00000185950/ENSG00000185345/ENSG00000164266/ENSG00000132170/ENSG00000144891/ENSG00000118785/ENSG00000137869
GO:0043549	BP	GO:0043549	regulation of kinase activity	87	0.39304802850466	1.67150443558283	0.00520833333333333	0.0257782567049808	0.0176824964710627	325	tags=38%, list=20%, signal=32%	ENSG00000138778/ENSG00000118193/ENSG00000158402/ENSG00000197299/ENSG00000127564/ENSG00000088325/ENSG00000092853/ENSG00000145386/ENSG00000157456/ENSG00000166851/ENSG00000100526/ENSG00000094804/ENSG00000162063/ENSG00000146918/ENSG00000161692/ENSG00000154928/ENSG00000114346/ENSG00000149503/ENSG00000106462/ENSG00000065361/ENSG00000175305/ENSG00000134057/ENSG00000123080/ENSG00000134222/ENSG00000080839…
GO:0006941	BP	GO:0006941	striated muscle contraction	13	-0.582874170103568	-1.86913195723278	0.00552631578947368	0.0272893529695799	0.0187190271671453	283	tags=62%, list=18%, signal=51%	ENSG00000144681/ENSG00000108984/ENSG00000123700/ENSG00000135124/ENSG00000173511/ENSG00000175538/ENSG00000155962/ENSG00000046604
GO:0031497	BP	GO:0031497	chromatin assembly	28	0.529035698096135	1.79448889999216	0.00555799327190288	0.0273204555123445	0.01874036183725	580	tags=79%, list=36%, signal=51%	ENSG00000123485/ENSG00000105011/ENSG00000119969/ENSG00000104147/ENSG00000106462/ENSG00000101945/ENSG00000188486/ENSG00000164104/ENSG00000167670/ENSG00000159055/ENSG00000123374/ENSG00000149948/ENSG00000130816/ENSG00000073111/ENSG00000159259/ENSG00000203760/ENSG00000132780/ENSG00000140326/ENSG00000184205/ENSG00000085224/ENSG00000128708/ENSG00000047410
GO:0006282	BP	GO:0006282	regulation of DNA repair	28	0.528915628989462	1.79408162562498	0.00555799327190288	0.0273204555123445	0.01874036183725	599	tags=79%, list=37%, signal=50%	ENSG00000051341/ENSG00000111247/ENSG00000012048/ENSG00000127423/ENSG00000111602/ENSG00000181544/ENSG00000188486/ENSG00000051180/ENSG00000109685/ENSG00000149948/ENSG00000162607/ENSG00000185480/ENSG00000089280/ENSG00000132436/ENSG00000133302/ENSG00000111206/ENSG00000175643/ENSG00000013573/ENSG00000141499/ENSG00000112983/ENSG00000136518/ENSG00000155816
GO:0007611	BP	GO:0007611	learning or memory	23	-0.483984891679302	-1.84137320759545	0.00573844759891272	0.0281432293404535	0.0193047403938965	484	tags=70%, list=30%, signal=49%	ENSG00000198908/ENSG00000118515/ENSG00000157045/ENSG00000075073/ENSG00000040531/ENSG00000169220/ENSG00000163064/ENSG00000130164/ENSG00000185345/ENSG00000064687/ENSG00000196743/ENSG00000162545/ENSG00000136531/ENSG00000161642/ENSG00000078725/ENSG00000196549
GO:0000152	CC	GO:0000152	nuclear ubiquitin ligase complex	11	0.689883218889743	1.85467490991851	0.00577081615828524	0.0281736217432837	0.0193255879462327	165	tags=55%, list=10%, signal=49%	ENSG00000156970/ENSG00000117399/ENSG00000175063/ENSG00000012048/ENSG00000138376/ENSG00000139618
GO:0009986	CC	GO:0009986	cell surface	59	-0.343142447261709	-1.66721384668959	0.00577081615828524	0.0281736217432837	0.0193255879462327	334	tags=41%, list=21%, signal=33%	ENSG00000130164/ENSG00000196975/ENSG00000197635/ENSG00000186907/ENSG00000064687/ENSG00000111674/ENSG00000131981/ENSG00000135245/ENSG00000196562/ENSG00000076716/ENSG00000073060/ENSG00000137507/ENSG00000103855/ENSG00000110203/ENSG00000119699/ENSG00000158473/ENSG00000178301/ENSG00000135218/ENSG00000143387/ENSG00000135077/ENSG00000046604/ENSG00000089041/ENSG00000196549/ENSG00000163823
GO:0045111	CC	GO:0045111	intermediate filament cytoskeleton	15	0.623214081718765	1.8217241662796	0.0058405682715075	0.0283214943435938	0.0194270205901494	508	tags=87%, list=31%, signal=60%	ENSG00000186847/ENSG00000113368/ENSG00000186832/ENSG00000171346/ENSG00000167768/ENSG00000205426/ENSG00000138587/ENSG00000131737/ENSG00000148798/ENSG00000159753/ENSG00000176619/ENSG00000096696/ENSG00000139437
GO:0002440	BP	GO:0002440	production of molecular mediator of immune response	23	0.561136054129147	1.8213066524929	0.00582872515319085	0.0283214943435938	0.0194270205901494	73	tags=26%, list=5%, signal=25%	ENSG00000211625/ENSG00000243466/ENSG00000240671/ENSG00000211598/ENSG00000174371/ENSG00000051341
GO:0000217	MF	GO:0000217	DNA secondary structure binding	15	0.623056426585636	1.82126332276791	0.0058405682715075	0.0283214943435938	0.0194270205901494	320	tags=67%, list=20%, signal=54%	ENSG00000109674/ENSG00000197299/ENSG00000111247/ENSG00000092853/ENSG00000196584/ENSG00000160957/ENSG00000178295/ENSG00000164104/ENSG00000187790/ENSG00000149948
GO:0006518	BP	GO:0006518	peptide metabolic process	99	-0.288682146475981	-1.56240482182584	0.00589496248660236	0.0285210207497862	0.0195638849644071	921	tags=85%, list=57%, signal=39%	ENSG00000086598/ENSG00000165525/ENSG00000204394/ENSG00000102580/ENSG00000156256/ENSG00000140598/ENSG00000165819/ENSG00000067900/ENSG00000198843/ENSG00000129245/ENSG00000138668/ENSG00000118246/ENSG00000136937/ENSG00000135829/ENSG00000114867/ENSG00000129351/ENSG00000143486/ENSG00000178149/ENSG00000142676/ENSG00000105640/ENSG00000090621/ENSG00000063177/ENSG00000104324/ENSG00000198755/ENSG00000142937…
GO:0046890	BP	GO:0046890	regulation of lipid biosynthetic process	22	-0.493425390823319	-1.85368512803369	0.00592943966795138	0.0286235058410299	0.0196341842202874	464	tags=68%, list=29%, signal=49%	ENSG00000135446/ENSG00000072310/ENSG00000134324/ENSG00000104763/ENSG00000138413/ENSG00000164211/ENSG00000130164/ENSG00000125629/ENSG00000172893/ENSG00000073060/ENSG00000186480/ENSG00000025434/ENSG00000169297/ENSG00000135914/ENSG00000121769
GO:0006638	BP	GO:0006638	neutral lipid metabolic process	14	-0.573999564050922	-1.87180882881808	0.00596044432403143	0.0286447246197314	0.0196487391602822	452	tags=71%, list=28%, signal=52%	ENSG00000072310/ENSG00000103066/ENSG00000134324/ENSG00000214274/ENSG00000176485/ENSG00000130164/ENSG00000125629/ENSG00000073060/ENSG00000186480/ENSG00000025434
GO:0006639	BP	GO:0006639	acylglycerol metabolic process	14	-0.573999564050922	-1.87180882881808	0.00596044432403143	0.0286447246197314	0.0196487391602822	452	tags=71%, list=28%, signal=52%	ENSG00000072310/ENSG00000103066/ENSG00000134324/ENSG00000214274/ENSG00000176485/ENSG00000130164/ENSG00000125629/ENSG00000073060/ENSG00000186480/ENSG00000025434
GO:0051382	BP	GO:0051382	kinetochore assembly	12	0.670883390411553	1.84314302673891	0.00603195304858168	0.0289238194066734	0.0198401831606144	269	tags=58%, list=17%, signal=49%	ENSG00000138778/ENSG00000117724/ENSG00000126787/ENSG00000115163/ENSG00000123219/ENSG00000184445/ENSG00000166451
GO:0097237	BP	GO:0097237	cellular response to toxic substance	19	-0.504247759441916	-1.81064046394853	0.00629110666285387	0.0300994503224986	0.0206466026853427	349	tags=58%, list=22%, signal=46%	ENSG00000147485/ENSG00000164867/ENSG00000185345/ENSG00000143198/ENSG00000167468/ENSG00000158122/ENSG00000211445/ENSG00000135218/ENSG00000137193/ENSG00000155962/ENSG00000122378
GO:0018105	BP	GO:0018105	peptidyl-serine phosphorylation	32	0.509409606646128	1.78316730025564	0.00648228176318064	0.0309453495257825	0.0212268440045336	322	tags=44%, list=20%, signal=36%	ENSG00000112742/ENSG00000170312/ENSG00000178999/ENSG00000092853/ENSG00000087586/ENSG00000166851/ENSG00000163673/ENSG00000120539/ENSG00000123374/ENSG00000097046/ENSG00000184995/ENSG00000149948/ENSG00000152953/ENSG00000134259
GO:0042098	BP	GO:0042098	T cell proliferation	18	-0.523551515009093	-1.84758754693172	0.00650452488687783	0.0309828364633805	0.0212525580258258	229	tags=44%, list=14%, signal=39%	ENSG00000131981/ENSG00000103490/ENSG00000137507/ENSG00000103855/ENSG00000158473/ENSG00000135077/ENSG00000089041/ENSG00000136235
GO:2000573	BP	GO:2000573	positive regulation of DNA biosynthetic process	17	0.603243874435702	1.81871607276009	0.00655430711610487	0.0311510446379112	0.0213679397790058	552	tags=82%, list=34%, signal=55%	ENSG00000117650/ENSG00000178999/ENSG00000127586/ENSG00000147536/ENSG00000077264/ENSG00000133119/ENSG00000131153/ENSG00000112562/ENSG00000101003/ENSG00000163918/ENSG00000111445/ENSG00000049541/ENSG00000141499/ENSG00000138685
GO:0005525	MF	GO:0005525	GTP binding	43	-0.379943499187212	-1.70768939871038	0.00657174151150055	0.0311651089741425	0.0213775871565854	372	tags=40%, list=23%, signal=31%	ENSG00000167658/ENSG00000118508/ENSG00000125354/ENSG00000164949/ENSG00000119729/ENSG00000168461/ENSG00000106560/ENSG00000183549/ENSG00000116954/ENSG00000188042/ENSG00000139832/ENSG00000083750/ENSG00000115963/ENSG00000169418/ENSG00000165105/ENSG00000025039/ENSG00000134594
GO:0042180	BP	GO:0042180	cellular ketone metabolic process	20	-0.50254747855972	-1.83073935938634	0.00666859959408524	0.0314857344869858	0.0215975189993112	351	tags=60%, list=22%, signal=48%	ENSG00000164211/ENSG00000185950/ENSG00000125629/ENSG00000151790/ENSG00000155465/ENSG00000186480/ENSG00000132170/ENSG00000119508/ENSG00000025434/ENSG00000137869/ENSG00000109819/ENSG00000121769
GO:0001932	BP	GO:0001932	regulation of protein phosphorylation	116	0.360684251755642	1.60058821629244	0.0066619081608375	0.0314857344869858	0.0215975189993112	340	tags=36%, list=21%, signal=31%	ENSG00000138778/ENSG00000183856/ENSG00000112742/ENSG00000118193/ENSG00000168078/ENSG00000158402/ENSG00000197299/ENSG00000127564/ENSG00000088325/ENSG00000092853/ENSG00000145386/ENSG00000157456/ENSG00000166851/ENSG00000100526/ENSG00000094804/ENSG00000266524/ENSG00000162063/ENSG00000146918/ENSG00000161692/ENSG00000138623/ENSG00000114346/ENSG00000149503/ENSG00000106462/ENSG00000065361/ENSG00000175305…
GO:2000278	BP	GO:2000278	regulation of DNA biosynthetic process	22	0.556506377914985	1.78524538354096	0.00693920651682003	0.0326917103516707	0.0224247535255062	389	tags=55%, list=24%, signal=42%	ENSG00000117650/ENSG00000178999/ENSG00000127586/ENSG00000147536/ENSG00000077264/ENSG00000133119/ENSG00000131153/ENSG00000112562/ENSG00000082482/ENSG00000101003/ENSG00000140451/ENSG00000163918
GO:0032154	CC	GO:0032154	cleavage furrow	11	0.6822622331264	1.83418673061932	0.00708985985160758	0.0333285333198933	0.0228615798018971	281	tags=64%, list=17%, signal=53%	ENSG00000138180/ENSG00000142731/ENSG00000112984/ENSG00000122966/ENSG00000161800/ENSG00000114346/ENSG00000120539
GO:0071479	BP	GO:0071479	cellular response to ionizing radiation	17	0.596554619039927	1.79854867973936	0.00717852684144819	0.0336718263390805	0.0230970603337961	387	tags=65%, list=24%, signal=50%	ENSG00000197299/ENSG00000111247/ENSG00000012048/ENSG00000138376/ENSG00000139618/ENSG00000114346/ENSG00000188486/ENSG00000051180/ENSG00000149948/ENSG00000132436/ENSG00000173848
GO:0055088	BP	GO:0055088	lipid homeostasis	20	-0.499227336770154	-1.81864435441224	0.00724847781965787	0.0339260277080943	0.0232714287894279	340	tags=70%, list=21%, signal=56%	ENSG00000105698/ENSG00000278540/ENSG00000127220/ENSG00000069667/ENSG00000185950/ENSG00000130164/ENSG00000113163/ENSG00000073060/ENSG00000119655/ENSG00000141458/ENSG00000186480/ENSG00000132170/ENSG00000025434/ENSG00000121769
GO:0021537	BP	GO:0021537	telencephalon development	18	0.59035982702866	1.80480513034338	0.00742229781970002	0.0346642238737834	0.0237777916224206	252	tags=44%, list=16%, signal=38%	ENSG00000066279/ENSG00000118193/ENSG00000075702/ENSG00000013810/ENSG00000184254/ENSG00000138623/ENSG00000106462/ENSG00000188486
GO:2001252	BP	GO:2001252	positive regulation of chromosome organization	24	0.547590020462366	1.79303196158275	0.00744269127716582	0.0346842301293031	0.0237915148367821	678	tags=88%, list=42%, signal=52%	ENSG00000117650/ENSG00000109805/ENSG00000121152/ENSG00000178999/ENSG00000113810/ENSG00000167513/ENSG00000123374/ENSG00000136824/ENSG00000130816/ENSG00000010292/ENSG00000188827/ENSG00000133302/ENSG00000013573/ENSG00000085224/ENSG00000168496/ENSG00000020922/ENSG00000047410/ENSG00000122566/ENSG00000164754/ENSG00000198887/ENSG00000175054
GO:0060048	BP	GO:0060048	cardiac muscle contraction	12	-0.586613688271028	-1.83400325635173	0.00749741468459152	0.034863787939364	0.0239146818289915	251	tags=58%, list=16%, signal=50%	ENSG00000108984/ENSG00000123700/ENSG00000135124/ENSG00000173511/ENSG00000175538/ENSG00000155962/ENSG00000046604
GO:0050890	BP	GO:0050890	cognition	24	-0.470525946963602	-1.81050012553879	0.00761266747868453	0.035323433365534	0.0242299738488984	484	tags=67%, list=30%, signal=47%	ENSG00000198908/ENSG00000118515/ENSG00000157045/ENSG00000075073/ENSG00000040531/ENSG00000169220/ENSG00000163064/ENSG00000130164/ENSG00000185345/ENSG00000064687/ENSG00000196743/ENSG00000162545/ENSG00000136531/ENSG00000161642/ENSG00000078725/ENSG00000196549
GO:0008238	MF	GO:0008238	exopeptidase activity	17	-0.518022628460632	-1.79874159469651	0.00779076238174736	0.0360048667420153	0.0246974004640025	322	tags=47%, list=20%, signal=38%	ENSG00000197635/ENSG00000064601/ENSG00000157227/ENSG00000124299/ENSG00000166340/ENSG00000102996/ENSG00000196549/ENSG00000153002
GO:0051053	BP	GO:0051053	negative regulation of DNA metabolic process	27	0.521775218197816	1.75606390765047	0.00779297162182032	0.0360048667420153	0.0246974004640025	401	tags=52%, list=25%, signal=40%	ENSG00000051341/ENSG00000197299/ENSG00000127423/ENSG00000094804/ENSG00000139618/ENSG00000111602/ENSG00000181544/ENSG00000167513/ENSG00000112029/ENSG00000149948/ENSG00000082482/ENSG00000185480/ENSG00000140451/ENSG00000188827
GO:0006820	BP	GO:0006820	anion transport	36	-0.40463881568206	-1.73494430515126	0.00786324786324786	0.0361743005332749	0.0248136229242842	424	tags=58%, list=26%, signal=44%	ENSG00000174327/ENSG00000040531/ENSG00000011021/ENSG00000092068/ENSG00000169100/ENSG00000119899/ENSG00000059804/ENSG00000164300/ENSG00000113163/ENSG00000108984/ENSG00000139974/ENSG00000174899/ENSG00000155465/ENSG00000170379/ENSG00000135124/ENSG00000110203/ENSG00000173930/ENSG00000135218/ENSG00000072041/ENSG00000155962/ENSG00000089041
GO:0017111	MF	GO:0017111	nucleoside-triphosphatase activity	95	0.376942074520543	1.62161272541133	0.0078546882670594	0.0361743005332749	0.0248136229242842	225	tags=24%, list=14%, signal=22%	ENSG00000186871/ENSG00000186185/ENSG00000121621/ENSG00000118193/ENSG00000237649/ENSG00000163808/ENSG00000138182/ENSG00000142945/ENSG00000137807/ENSG00000136492/ENSG00000197299/ENSG00000085999/ENSG00000127586/ENSG00000112984/ENSG00000125885/ENSG00000156802/ENSG00000079616/ENSG00000160957/ENSG00000071539/ENSG00000100297/ENSG00000085840/ENSG00000176208/ENSG00000113810
GO:0090224	BP	GO:0090224	regulation of spindle organization	13	0.642092561928126	1.80239575797606	0.00790067720090293	0.036191825560732	0.0248256441497577	404	tags=69%, list=25%, signal=52%	ENSG00000163808/ENSG00000076382/ENSG00000088325/ENSG00000013810/ENSG00000166851/ENSG00000134222/ENSG00000136122/ENSG00000121957/ENSG00000182504
GO:0007610	BP	GO:0007610	behavior	47	-0.364018321483169	-1.67303753408045	0.00789770590447537	0.036191825560732	0.0248256441497577	487	tags=57%, list=30%, signal=41%	ENSG00000176928/ENSG00000198908/ENSG00000118515/ENSG00000157045/ENSG00000075073/ENSG00000040531/ENSG00000169220/ENSG00000177628/ENSG00000163064/ENSG00000130164/ENSG00000197635/ENSG00000185345/ENSG00000064687/ENSG00000196743/ENSG00000162545/ENSG00000160213/ENSG00000118473/ENSG00000141458/ENSG00000135124/ENSG00000136531/ENSG00000119508/ENSG00000161642/ENSG00000055732/ENSG00000078725/ENSG00000250722…
GO:0032200	BP	GO:0032200	telomere organization	24	0.543539472501946	1.77976882368111	0.00803810657933909	0.0367431920707368	0.0252038518958828	401	tags=50%, list=25%, signal=38%	ENSG00000117650/ENSG00000178999/ENSG00000174371/ENSG00000197299/ENSG00000160957/ENSG00000139618/ENSG00000106462/ENSG00000175305/ENSG00000138346/ENSG00000051180/ENSG00000140451/ENSG00000188827
GO:1903522	BP	GO:1903522	regulation of blood circulation	18	-0.508065505106145	-1.7929381796238	0.00820135746606335	0.0373444703125241	0.025616296403291	452	tags=67%, list=28%, signal=49%	ENSG00000072310/ENSG00000116016/ENSG00000087245/ENSG00000101400/ENSG00000164867/ENSG00000123700/ENSG00000135124/ENSG00000048740/ENSG00000175538/ENSG00000144891/ENSG00000155962/ENSG00000046604
GO:0006486	BP	GO:0006486	protein glycosylation	24	-0.464282016926911	-1.78647459370949	0.00822168087697929	0.0373444703125241	0.025616296403291	207	tags=33%, list=13%, signal=29%	ENSG00000172986/ENSG00000115525/ENSG00000183828/ENSG00000141458/ENSG00000173511/ENSG00000178301/ENSG00000117643/ENSG00000140297
GO:0043413	BP	GO:0043413	macromolecule glycosylation	24	-0.464282016926911	-1.78647459370949	0.00822168087697929	0.0373444703125241	0.025616296403291	207	tags=33%, list=13%, signal=29%	ENSG00000172986/ENSG00000115525/ENSG00000183828/ENSG00000141458/ENSG00000173511/ENSG00000178301/ENSG00000117643/ENSG00000140297
GO:0044283	BP	GO:0044283	small molecule biosynthetic process	60	-0.330351995683163	-1.61060931964067	0.00827472072817542	0.0375062604794983	0.0257272757487648	573	tags=63%, list=36%, signal=42%	ENSG00000177000/ENSG00000115425/ENSG00000081760/ENSG00000278540/ENSG00000130005/ENSG00000143772/ENSG00000116133/ENSG00000132196/ENSG00000079739/ENSG00000072310/ENSG00000166228/ENSG00000100979/ENSG00000150907/ENSG00000141447/ENSG00000177628/ENSG00000104763/ENSG00000067064/ENSG00000164211/ENSG00000125629/ENSG00000143198/ENSG00000110921/ENSG00000111674/ENSG00000164300/ENSG00000167468/ENSG00000172893…
GO:0000723	BP	GO:0000723	telomere maintenance	22	0.552791304341754	1.77332760827489	0.00829687735706743	0.037527682667576	0.0257419702166422	687	tags=91%, list=43%, signal=53%	ENSG00000117650/ENSG00000178999/ENSG00000174371/ENSG00000197299/ENSG00000160957/ENSG00000139618/ENSG00000175305/ENSG00000138346/ENSG00000051180/ENSG00000140451/ENSG00000188827/ENSG00000141499/ENSG00000085224/ENSG00000168496/ENSG00000020922/ENSG00000122566/ENSG00000073050/ENSG00000198887/ENSG00000175054/ENSG00000100726
GO:0018209	BP	GO:0018209	peptidyl-serine modification	35	0.480211993496371	1.71473809100767	0.00836523465192117	0.0377575476008098	0.025899645187345	322	tags=40%, list=20%, signal=33%	ENSG00000112742/ENSG00000170312/ENSG00000178999/ENSG00000092853/ENSG00000087586/ENSG00000166851/ENSG00000163673/ENSG00000120539/ENSG00000123374/ENSG00000097046/ENSG00000184995/ENSG00000149948/ENSG00000152953/ENSG00000134259
GO:0030099	BP	GO:0030099	myeloid cell differentiation	42	-0.375681116126919	-1.6723305802107	0.00872093023255814	0.0392806752943466	0.0269444287960341	547	tags=71%, list=34%, signal=48%	ENSG00000105372/ENSG00000105612/ENSG00000164587/ENSG00000142192/ENSG00000077585/ENSG00000156535/ENSG00000143772/ENSG00000113916/ENSG00000169926/ENSG00000128016/ENSG00000147883/ENSG00000180354/ENSG00000116016/ENSG00000187098/ENSG00000177628/ENSG00000172819/ENSG00000155846/ENSG00000164251/ENSG00000138795/ENSG00000137265/ENSG00000129757/ENSG00000169710/ENSG00000086300/ENSG00000132170/ENSG00000161642…
GO:0001508	BP	GO:0001508	action potential	10	-0.641480860434773	-1.86906818217169	0.00905660377358491	0.0407074486942136	0.0279231185459612	381	tags=80%, list=24%, signal=61%	ENSG00000101400/ENSG00000177628/ENSG00000123700/ENSG00000135124/ENSG00000136531/ENSG00000175538/ENSG00000135218/ENSG00000046604
GO:0019001	MF	GO:0019001	guanyl nucleotide binding	44	-0.368381876818651	-1.66354223648287	0.00921828908554572	0.0412619051999583	0.028303445862831	372	tags=39%, list=23%, signal=31%	ENSG00000167658/ENSG00000118508/ENSG00000125354/ENSG00000164949/ENSG00000119729/ENSG00000168461/ENSG00000106560/ENSG00000183549/ENSG00000116954/ENSG00000188042/ENSG00000139832/ENSG00000083750/ENSG00000115963/ENSG00000169418/ENSG00000165105/ENSG00000025039/ENSG00000134594
GO:0032561	MF	GO:0032561	guanyl ribonucleotide binding	44	-0.368381876818651	-1.66354223648287	0.00921828908554572	0.0412619051999583	0.028303445862831	372	tags=39%, list=23%, signal=31%	ENSG00000167658/ENSG00000118508/ENSG00000125354/ENSG00000164949/ENSG00000119729/ENSG00000168461/ENSG00000106560/ENSG00000183549/ENSG00000116954/ENSG00000188042/ENSG00000139832/ENSG00000083750/ENSG00000115963/ENSG00000169418/ENSG00000165105/ENSG00000025039/ENSG00000134594
GO:0030666	CC	GO:0030666	endocytic vesicle membrane	18	-0.501175276198461	-1.76862290068678	0.00933257918552036	0.0415145516248457	0.0284767477104938	672	tags=89%, list=42%, signal=52%	ENSG00000221983/ENSG00000123595/ENSG00000005893/ENSG00000197081/ENSG00000171130/ENSG00000185896/ENSG00000118508/ENSG00000130164/ENSG00000164867/ENSG00000168461/ENSG00000139832/ENSG00000073060/ENSG00000118473/ENSG00000158270/ENSG00000135218/ENSG00000198502
GO:0061025	BP	GO:0061025	membrane fusion	18	-0.501055805284089	-1.76820129370583	0.00933257918552036	0.0415145516248457	0.0284767477104938	626	tags=78%, list=39%, signal=48%	ENSG00000100568/ENSG00000143545/ENSG00000105402/ENSG00000134108/ENSG00000187446/ENSG00000102189/ENSG00000171045/ENSG00000006715/ENSG00000225190/ENSG00000139832/ENSG00000166900/ENSG00000110203/ENSG00000135047/ENSG00000102445
GO:0008284	BP	GO:0008284	positive regulation of cell population proliferation	86	0.379439887405561	1.61048706531876	0.00931098696461825	0.0415145516248457	0.0284767477104938	320	tags=38%, list=20%, signal=32%	ENSG00000066279/ENSG00000183856/ENSG00000112742/ENSG00000118193/ENSG00000170312/ENSG00000164283/ENSG00000138182/ENSG00000117399/ENSG00000170961/ENSG00000198901/ENSG00000186193/ENSG00000089685/ENSG00000075702/ENSG00000145386/ENSG00000154734/ENSG00000094804/ENSG00000161692/ENSG00000176208/ENSG00000101412/ENSG00000106462/ENSG00000065361/ENSG00000134057/ENSG00000112029/ENSG00000150630/ENSG00000197646…
GO:0019932	BP	GO:0019932	second-messenger-mediated signaling	23	-0.464930692535467	-1.76887943268874	0.00936273029296285	0.0415628006613382	0.0285098439523101	169	tags=39%, list=10%, signal=36%	ENSG00000169418/ENSG00000164266/ENSG00000135124/ENSG00000135218/ENSG00000144891/ENSG00000155962/ENSG00000089041/ENSG00000135914/ENSG00000163823
GO:0043604	BP	GO:0043604	amide biosynthetic process	94	-0.284691459979058	-1.5226592988744	0.00965665236051502	0.0427793673501828	0.0293443432137808	1050	tags=85%, list=65%, signal=32%	ENSG00000086598/ENSG00000165525/ENSG00000204394/ENSG00000102580/ENSG00000156256/ENSG00000100596/ENSG00000140598/ENSG00000165819/ENSG00000067900/ENSG00000198843/ENSG00000129245/ENSG00000006530/ENSG00000138668/ENSG00000118246/ENSG00000136937/ENSG00000148154/ENSG00000135829/ENSG00000114867/ENSG00000129351/ENSG00000143486/ENSG00000178149/ENSG00000142676/ENSG00000105640/ENSG00000100075/ENSG00000090621…
GO:0009101	BP	GO:0009101	glycoprotein biosynthetic process	30	-0.418934849455951	-1.71469993229163	0.00997425997425997	0.044095650358484	0.0302472425027272	207	tags=30%, list=13%, signal=27%	ENSG00000172986/ENSG00000115525/ENSG00000183828/ENSG00000141458/ENSG00000173511/ENSG00000103154/ENSG00000178301/ENSG00000117643/ENSG00000140297
GO:0007095	BP	GO:0007095	mitotic G2 DNA damage checkpoint signaling	14	0.6197823951669	1.78174972366476	0.0101410236095706	0.0447410324414047	0.0306899398710689	149	tags=43%, list=9%, signal=39%	ENSG00000170312/ENSG00000197299/ENSG00000092853/ENSG00000012048/ENSG00000143476/ENSG00000166851
GO:0006936	BP	GO:0006936	muscle contraction	31	-0.409916033963982	-1.69010668063032	0.0103694102397926	0.0456550925281667	0.0313169358872652	283	tags=65%, list=18%, signal=54%	ENSG00000130005/ENSG00000130821/ENSG00000172164/ENSG00000036448/ENSG00000075073/ENSG00000101400/ENSG00000109846/ENSG00000144681/ENSG00000113163/ENSG00000108984/ENSG00000123700/ENSG00000196562/ENSG00000131730/ENSG00000135124/ENSG00000173511/ENSG00000175538/ENSG00000101605/ENSG00000155962/ENSG00000046604/ENSG00000135914
GO:0003015	BP	GO:0003015	heart process	19	-0.493999481686935	-1.7738412000123	0.0105804975693452	0.0463947276309575	0.0318242857536526	452	tags=63%, list=28%, signal=46%	ENSG00000072310/ENSG00000116016/ENSG00000101400/ENSG00000164867/ENSG00000108984/ENSG00000123700/ENSG00000135124/ENSG00000173511/ENSG00000048740/ENSG00000175538/ENSG00000155962/ENSG00000046604
GO:0060047	BP	GO:0060047	heart contraction	19	-0.493999481686935	-1.7738412000123	0.0105804975693452	0.0463947276309575	0.0318242857536526	452	tags=63%, list=28%, signal=46%	ENSG00000072310/ENSG00000116016/ENSG00000101400/ENSG00000164867/ENSG00000108984/ENSG00000123700/ENSG00000135124/ENSG00000173511/ENSG00000048740/ENSG00000175538/ENSG00000155962/ENSG00000046604
GO:0061629	MF	GO:0061629	RNA polymerase II-specific DNA-binding transcription factor binding	27	-0.434738075001512	-1.73525234961407	0.0106216807247735	0.0464806475618646	0.031883222201235	453	tags=52%, list=28%, signal=38%	ENSG00000149600/ENSG00000116016/ENSG00000172819/ENSG00000188243/ENSG00000070540/ENSG00000155846/ENSG00000196975/ENSG00000138795/ENSG00000169083/ENSG00000134107/ENSG00000132170/ENSG00000119508/ENSG00000169297/ENSG00000109819
GO:0006637	BP	GO:0006637	acyl-CoA metabolic process	11	-0.597041569014832	-1.80978059377103	0.0106680213360427	0.0464944330698378	0.0318926783176388	331	tags=64%, list=21%, signal=51%	ENSG00000131069/ENSG00000110921/ENSG00000151790/ENSG00000183549/ENSG00000167107/ENSG00000167508/ENSG00000112972
GO:0035383	BP	GO:0035383	thioester metabolic process	11	-0.597041569014832	-1.80978059377103	0.0106680213360427	0.0464944330698378	0.0318926783176388	331	tags=64%, list=21%, signal=51%	ENSG00000131069/ENSG00000110921/ENSG00000151790/ENSG00000183549/ENSG00000167107/ENSG00000167508/ENSG00000112972
GO:0044380	BP	GO:0044380	protein localization to cytoskeleton	12	0.647732899807296	1.77954081816933	0.0109227257906749	0.0474125577163773	0.0325224624030495	221	tags=50%, list=14%, signal=43%	ENSG00000112742/ENSG00000138182/ENSG00000076382/ENSG00000101447/ENSG00000087586/ENSG00000123473
GO:0072698	BP	GO:0072698	protein localization to microtubule cytoskeleton	12	0.647732899807296	1.77954081816933	0.0109227257906749	0.0474125577163773	0.0325224624030495	221	tags=50%, list=14%, signal=43%	ENSG00000112742/ENSG00000138182/ENSG00000076382/ENSG00000101447/ENSG00000087586/ENSG00000123473
GO:0046849	BP	GO:0046849	bone remodeling	15	-0.539009774270791	-1.7997414586735	0.0111808017452959	0.0481445323152441	0.0330245575761055	162	tags=67%, list=10%, signal=61%	ENSG00000187098/ENSG00000155846/ENSG00000225190/ENSG00000166340/ENSG00000086300/ENSG00000119699/ENSG00000102575/ENSG00000143387/ENSG00000118785/ENSG00000089041
GO:0032409	BP	GO:0032409	regulation of transporter activity	23	-0.456920829066348	-1.73840503515671	0.0111748716399879	0.0481445323152441	0.0330245575761055	289	tags=43%, list=18%, signal=36%	ENSG00000164949/ENSG00000144681/ENSG00000205542/ENSG00000170379/ENSG00000148175/ENSG00000132170/ENSG00000175538/ENSG00000025434/ENSG00000137193/ENSG00000155962
GO:0031966	CC	GO:0031966	mitochondrial membrane	45	-0.361720003077418	-1.64281710395454	0.0111482720178372	0.0481445323152441	0.0330245575761055	812	tags=82%, list=50%, signal=42%	ENSG00000138029/ENSG00000144741/ENSG00000131143/ENSG00000100075/ENSG00000131943/ENSG00000197119/ENSG00000124098/ENSG00000103202/ENSG00000278845/ENSG00000104765/ENSG00000221983/ENSG00000127184/ENSG00000119632/ENSG00000164051/ENSG00000184602/ENSG00000130312/ENSG00000166575/ENSG00000185633/ENSG00000115204/ENSG00000075240/ENSG00000108828/ENSG00000165233/ENSG00000115944/ENSG00000134324/ENSG00000118508…
GO:0048871	BP	GO:0048871	multicellular organismal homeostasis	55	-0.338006752273941	-1.61946481343307	0.0111687275628241	0.0481445323152441	0.0330245575761055	418	tags=49%, list=26%, signal=38%	ENSG00000116016/ENSG00000107798/ENSG00000134324/ENSG00000150907/ENSG00000177628/ENSG00000155846/ENSG00000164867/ENSG00000078804/ENSG00000225190/ENSG00000161011/ENSG00000188613/ENSG00000137265/ENSG00000108984/ENSG00000166340/ENSG00000118473/ENSG00000135124/ENSG00000086300/ENSG00000119508/ENSG00000102575/ENSG00000025434/ENSG00000135218/ENSG00000143387/ENSG00000118785/ENSG00000089041/ENSG00000109819…
GO:0006909	BP	GO:0006909	phagocytosis	24	-0.457041036086998	-1.75861258778976	0.0112667478684531	0.048417780760039	0.0332119913004301	334	tags=50%, list=21%, signal=40%	ENSG00000130164/ENSG00000164251/ENSG00000064687/ENSG00000168461/ENSG00000103490/ENSG00000139832/ENSG00000073060/ENSG00000158270/ENSG00000025434/ENSG00000135218/ENSG00000089041/ENSG00000159674
GO:1990748	BP	GO:1990748	cellular detoxification	18	-0.49160040507466	-1.73483365140631	0.0113122171945701	0.0485163418723297	0.0332795989179742	349	tags=56%, list=22%, signal=44%	ENSG00000147485/ENSG00000164867/ENSG00000143198/ENSG00000167468/ENSG00000158122/ENSG00000211445/ENSG00000135218/ENSG00000137193/ENSG00000155962/ENSG00000122378

## Sheet: gsea_GO_TNFA
	ONTOLOGY	ID	Description	setSize	enrichmentScore	NES	pvalue	p.adjust	qvalues	rank	leading_edge	core_enrichment
GO:0007059	BP	GO:0007059	chromosome segregation	132	0.70517698450238	2.91243787184787	0.000104701078421108	0.00208369508595242	0.001585761645388	476	tags=60%, list=17%, signal=52%	ENSG00000148773/ENSG00000117650/ENSG00000154839/ENSG00000123485/ENSG00000121621/ENSG00000109805/ENSG00000171320/ENSG00000112742/ENSG00000138778/ENSG00000117724/ENSG00000156970/ENSG00000175063/ENSG00000129810/ENSG00000131747/ENSG00000143228/ENSG00000121152/ENSG00000186185/ENSG00000137804/ENSG00000169679/ENSG00000137812/ENSG00000152253/ENSG00000178999/ENSG00000126787/ENSG00000076382/ENSG00000117399…
GO:0000280	BP	GO:0000280	nuclear division	151	0.692254979694344	2.89234114462396	0.00010371292263016	0.00208369508595242	0.001585761645388	372	tags=55%, list=14%, signal=50%	ENSG00000124882/ENSG00000148773/ENSG00000117650/ENSG00000125538/ENSG00000121621/ENSG00000109805/ENSG00000066279/ENSG00000112742/ENSG00000138778/ENSG00000117724/ENSG00000156970/ENSG00000175063/ENSG00000129810/ENSG00000131747/ENSG00000143228/ENSG00000121152/ENSG00000186185/ENSG00000137804/ENSG00000169679/ENSG00000178999/ENSG00000126787/ENSG00000076382/ENSG00000011426/ENSG00000117399/ENSG00000142945…
GO:0140014	BP	GO:0140014	mitotic nuclear division	113	0.709136582394283	2.88376727182311	0.00010612331529237	0.00208369508595242	0.001585761645388	372	tags=57%, list=14%, signal=51%	ENSG00000124882/ENSG00000148773/ENSG00000117650/ENSG00000125538/ENSG00000121621/ENSG00000109805/ENSG00000112742/ENSG00000138778/ENSG00000117724/ENSG00000156970/ENSG00000175063/ENSG00000129810/ENSG00000143228/ENSG00000121152/ENSG00000186185/ENSG00000137804/ENSG00000169679/ENSG00000178999/ENSG00000126787/ENSG00000076382/ENSG00000011426/ENSG00000117399/ENSG00000142945/ENSG00000118193/ENSG00000237649…
GO:0098813	BP	GO:0098813	nuclear chromosome segregation	114	0.705833192062064	2.87274251049293	0.000106100795755968	0.00208369508595242	0.001585761645388	476	tags=60%, list=17%, signal=51%	ENSG00000117650/ENSG00000121621/ENSG00000109805/ENSG00000171320/ENSG00000112742/ENSG00000138778/ENSG00000117724/ENSG00000156970/ENSG00000175063/ENSG00000129810/ENSG00000131747/ENSG00000143228/ENSG00000121152/ENSG00000186185/ENSG00000137804/ENSG00000169679/ENSG00000137812/ENSG00000152253/ENSG00000178999/ENSG00000126787/ENSG00000076382/ENSG00000117399/ENSG00000142945/ENSG00000118193/ENSG00000237649…
GO:0048285	BP	GO:0048285	organelle fission	158	0.680397367412217	2.85269696691935	0.000103498240529911	0.00208369508595242	0.001585761645388	523	tags=61%, list=19%, signal=52%	ENSG00000124882/ENSG00000148773/ENSG00000117650/ENSG00000125538/ENSG00000121621/ENSG00000109805/ENSG00000066279/ENSG00000112742/ENSG00000138778/ENSG00000117724/ENSG00000156970/ENSG00000175063/ENSG00000129810/ENSG00000131747/ENSG00000143228/ENSG00000121152/ENSG00000186185/ENSG00000137804/ENSG00000169679/ENSG00000178999/ENSG00000126787/ENSG00000076382/ENSG00000011426/ENSG00000117399/ENSG00000142945…
GO:0000070	BP	GO:0000070	mitotic sister chromatid segregation	78	0.728293290586073	2.83288933796584	0.000110705192073508	0.00208369508595242	0.001585761645388	365	tags=60%, list=13%, signal=54%	ENSG00000117650/ENSG00000121621/ENSG00000109805/ENSG00000112742/ENSG00000138778/ENSG00000117724/ENSG00000156970/ENSG00000175063/ENSG00000129810/ENSG00000143228/ENSG00000121152/ENSG00000186185/ENSG00000137804/ENSG00000169679/ENSG00000178999/ENSG00000126787/ENSG00000076382/ENSG00000117399/ENSG00000142945/ENSG00000118193/ENSG00000237649/ENSG00000090889/ENSG00000134690/ENSG00000080986/ENSG00000137807…
GO:0000819	BP	GO:0000819	sister chromatid segregation	91	0.706910209737546	2.80471067381792	0.000108742931709439	0.00208369508595242	0.001585761645388	476	tags=60%, list=17%, signal=52%	ENSG00000117650/ENSG00000121621/ENSG00000109805/ENSG00000171320/ENSG00000112742/ENSG00000138778/ENSG00000117724/ENSG00000156970/ENSG00000175063/ENSG00000129810/ENSG00000131747/ENSG00000143228/ENSG00000121152/ENSG00000186185/ENSG00000137804/ENSG00000169679/ENSG00000178999/ENSG00000126787/ENSG00000076382/ENSG00000117399/ENSG00000142945/ENSG00000118193/ENSG00000237649/ENSG00000090889/ENSG00000134690…
GO:0051301	BP	GO:0051301	cell division	199	0.644512303408782	2.74699237955385	0.000102207686017989	0.00208369508595242	0.001585761645388	475	tags=52%, list=17%, signal=46%	ENSG00000124882/ENSG00000129173/ENSG00000117650/ENSG00000125538/ENSG00000154839/ENSG00000170312/ENSG00000109805/ENSG00000066279/ENSG00000138778/ENSG00000117724/ENSG00000156970/ENSG00000186871/ENSG00000175063/ENSG00000129810/ENSG00000131747/ENSG00000143228/ENSG00000121152/ENSG00000186185/ENSG00000137804/ENSG00000169679/ENSG00000137812/ENSG00000152253/ENSG00000178999/ENSG00000076382/ENSG00000115163…
GO:0000776	CC	GO:0000776	kinetochore	68	0.716789073421976	2.73311432505698	0.000112892300745089	0.00208369508595242	0.001585761645388	523	tags=65%, list=19%, signal=54%	ENSG00000117650/ENSG00000154839/ENSG00000123485/ENSG00000121621/ENSG00000112742/ENSG00000138778/ENSG00000117724/ENSG00000156970/ENSG00000186871/ENSG00000129810/ENSG00000143228/ENSG00000169679/ENSG00000137812/ENSG00000152253/ENSG00000178999/ENSG00000076382/ENSG00000115163/ENSG00000142945/ENSG00000165480/ENSG00000080986/ENSG00000163535/ENSG00000089685/ENSG00000102384/ENSG00000166851/ENSG00000151725…
GO:0000775	CC	GO:0000775	chromosome, centromeric region	94	0.686058101754637	2.7299245250522	0.000108201687946332	0.00208369508595242	0.001585761645388	523	tags=61%, list=19%, signal=51%	ENSG00000117650/ENSG00000154839/ENSG00000123485/ENSG00000121621/ENSG00000109805/ENSG00000171320/ENSG00000112742/ENSG00000138778/ENSG00000117724/ENSG00000156970/ENSG00000186871/ENSG00000129810/ENSG00000131747/ENSG00000143228/ENSG00000169679/ENSG00000137812/ENSG00000152253/ENSG00000178999/ENSG00000076382/ENSG00000115163/ENSG00000142945/ENSG00000165480/ENSG00000134690/ENSG00000080986/ENSG00000163535…
GO:0000793	CC	GO:0000793	condensed chromosome	100	0.676514978465088	2.71060352861356	0.000107642626480086	0.00208369508595242	0.001585761645388	523	tags=60%, list=19%, signal=50%	ENSG00000148773/ENSG00000117650/ENSG00000154839/ENSG00000123485/ENSG00000121621/ENSG00000109805/ENSG00000112742/ENSG00000138778/ENSG00000117724/ENSG00000156970/ENSG00000186871/ENSG00000129810/ENSG00000131747/ENSG00000143228/ENSG00000169679/ENSG00000137812/ENSG00000152253/ENSG00000178999/ENSG00000076382/ENSG00000115163/ENSG00000142945/ENSG00000165480/ENSG00000080986/ENSG00000163535/ENSG00000089685…
GO:0010564	BP	GO:0010564	regulation of cell cycle process	198	0.635925720225049	2.70934041087032	0.000102239034863511	0.00208369508595242	0.001585761645388	523	tags=54%, list=19%, signal=47%	ENSG00000124882/ENSG00000129173/ENSG00000148773/ENSG00000171848/ENSG00000117650/ENSG00000125538/ENSG00000170312/ENSG00000112742/ENSG00000108691/ENSG00000138778/ENSG00000117724/ENSG00000156970/ENSG00000175063/ENSG00000137804/ENSG00000169679/ENSG00000178999/ENSG00000126787/ENSG00000076382/ENSG00000075218/ENSG00000011426/ENSG00000117399/ENSG00000118193/ENSG00000101447/ENSG00000163808/ENSG00000138182…
GO:0000779	CC	GO:0000779	condensed chromosome, centromeric region	71	0.705219418617005	2.70575735018766	0.000112334306897326	0.00208369508595242	0.001585761645388	523	tags=63%, list=19%, signal=53%	ENSG00000117650/ENSG00000154839/ENSG00000123485/ENSG00000121621/ENSG00000109805/ENSG00000112742/ENSG00000138778/ENSG00000117724/ENSG00000156970/ENSG00000186871/ENSG00000129810/ENSG00000143228/ENSG00000169679/ENSG00000137812/ENSG00000152253/ENSG00000178999/ENSG00000076382/ENSG00000115163/ENSG00000142945/ENSG00000165480/ENSG00000080986/ENSG00000163535/ENSG00000089685/ENSG00000102384/ENSG00000166851…
GO:1902850	BP	GO:1902850	microtubule cytoskeleton organization involved in mitosis	59	0.723446276932257	2.69626305908083	0.000115300357431108	0.00208369508595242	0.001585761645388	333	tags=54%, list=12%, signal=49%	ENSG00000117650/ENSG00000112742/ENSG00000138778/ENSG00000143228/ENSG00000137804/ENSG00000152253/ENSG00000178999/ENSG00000126787/ENSG00000115163/ENSG00000117399/ENSG00000237649/ENSG00000090889/ENSG00000163808/ENSG00000138160/ENSG00000080986/ENSG00000137807/ENSG00000101057/ENSG00000198901/ENSG00000087586/ENSG00000088325/ENSG00000186193/ENSG00000075702/ENSG00000135476/ENSG00000166851/ENSG00000013810…
GO:0098687	CC	GO:0098687	chromosomal region	140	0.645096270525644	2.67746832730365	0.000104416831993317	0.00208369508595242	0.001585761645388	687	tags=63%, list=25%, signal=50%	ENSG00000117650/ENSG00000154839/ENSG00000123485/ENSG00000170312/ENSG00000121621/ENSG00000109805/ENSG00000171320/ENSG00000112742/ENSG00000138778/ENSG00000117724/ENSG00000156970/ENSG00000186871/ENSG00000129810/ENSG00000131747/ENSG00000143228/ENSG00000169679/ENSG00000137812/ENSG00000152253/ENSG00000178999/ENSG00000076382/ENSG00000115163/ENSG00000142945/ENSG00000165480/ENSG00000134690/ENSG00000080986…
GO:0140013	BP	GO:0140013	meiotic nuclear division	61	0.712942401287358	2.67386930147987	0.000114889705882353	0.00208369508595242	0.001585761645388	498	tags=69%, list=18%, signal=58%	ENSG00000124882/ENSG00000121621/ENSG00000066279/ENSG00000112742/ENSG00000156970/ENSG00000129810/ENSG00000131747/ENSG00000143228/ENSG00000121152/ENSG00000169679/ENSG00000117399/ENSG00000156509/ENSG00000080986/ENSG00000185697/ENSG00000163535/ENSG00000087586/ENSG00000136492/ENSG00000135476/ENSG00000111247/ENSG00000085999/ENSG00000157456/ENSG00000166851/ENSG00000164611/ENSG00000100206/ENSG00000154920…
GO:0005819	CC	GO:0005819	spindle	121	0.651976874065905	2.66796084833133	0.00010568590150074	0.00208369508595242	0.001585761645388	365	tags=46%, list=13%, signal=42%	ENSG00000169607/ENSG00000117650/ENSG00000154839/ENSG00000170312/ENSG00000121621/ENSG00000066279/ENSG00000112742/ENSG00000138778/ENSG00000117724/ENSG00000156970/ENSG00000072571/ENSG00000129810/ENSG00000186185/ENSG00000137804/ENSG00000178999/ENSG00000126787/ENSG00000076382/ENSG00000117399/ENSG00000142945/ENSG00000118193/ENSG00000237649/ENSG00000101447/ENSG00000090889/ENSG00000163808/ENSG00000165480…
GO:1903046	BP	GO:1903046	meiotic cell cycle process	67	0.700409904222164	2.66611757677271	0.000113007119448525	0.00208369508595242	0.001585761645388	623	tags=75%, list=23%, signal=59%	ENSG00000124882/ENSG00000121621/ENSG00000066279/ENSG00000112742/ENSG00000156970/ENSG00000129810/ENSG00000131747/ENSG00000143228/ENSG00000121152/ENSG00000169679/ENSG00000117399/ENSG00000158402/ENSG00000156509/ENSG00000080986/ENSG00000185697/ENSG00000163535/ENSG00000087586/ENSG00000136492/ENSG00000135476/ENSG00000111247/ENSG00000085999/ENSG00000157456/ENSG00000166851/ENSG00000164611/ENSG00000100206…
GO:0090068	BP	GO:0090068	positive regulation of cell cycle process	71	0.694191799687715	2.66344702777551	0.000112334306897326	0.00208369508595242	0.001585761645388	593	tags=69%, list=22%, signal=56%	ENSG00000124882/ENSG00000129173/ENSG00000171848/ENSG00000125538/ENSG00000170312/ENSG00000175063/ENSG00000137804/ENSG00000178999/ENSG00000126787/ENSG00000076382/ENSG00000118193/ENSG00000101447/ENSG00000138182/ENSG00000158402/ENSG00000080986/ENSG00000163235/ENSG00000137807/ENSG00000087586/ENSG00000142731/ENSG00000135476/ENSG00000111247/ENSG00000134057/ENSG00000143476/ENSG00000122966/ENSG00000146670…
GO:0051783	BP	GO:0051783	regulation of nuclear division	53	0.725002076167842	2.65477230361428	0.000116890707188778	0.00208369508595242	0.001585761645388	521	tags=75%, list=19%, signal=62%	ENSG00000124882/ENSG00000148773/ENSG00000117650/ENSG00000125538/ENSG00000112742/ENSG00000117724/ENSG00000156970/ENSG00000137804/ENSG00000169679/ENSG00000178999/ENSG00000126787/ENSG00000117399/ENSG00000138182/ENSG00000158402/ENSG00000156509/ENSG00000080986/ENSG00000163235/ENSG00000087586/ENSG00000135476/ENSG00000111247/ENSG00000166851/ENSG00000127564/ENSG00000134057/ENSG00000184661/ENSG00000071539…
GO:0007088	BP	GO:0007088	regulation of mitotic nuclear division	44	0.746757658499758	2.64955603861017	0.000119961612284069	0.00208369508595242	0.001585761645388	365	tags=68%, list=13%, signal=60%	ENSG00000124882/ENSG00000148773/ENSG00000117650/ENSG00000125538/ENSG00000112742/ENSG00000117724/ENSG00000156970/ENSG00000137804/ENSG00000169679/ENSG00000178999/ENSG00000126787/ENSG00000138182/ENSG00000158402/ENSG00000156509/ENSG00000080986/ENSG00000163235/ENSG00000087586/ENSG00000135476/ENSG00000166851/ENSG00000127564/ENSG00000134057/ENSG00000184661/ENSG00000071539/ENSG00000122952/ENSG00000164109…
GO:0007052	BP	GO:0007052	mitotic spindle organization	49	0.730210663745383	2.63757665789706	0.000118161408483989	0.00208369508595242	0.001585761645388	333	tags=55%, list=12%, signal=49%	ENSG00000117650/ENSG00000112742/ENSG00000138778/ENSG00000143228/ENSG00000152253/ENSG00000178999/ENSG00000126787/ENSG00000117399/ENSG00000237649/ENSG00000090889/ENSG00000163808/ENSG00000138160/ENSG00000080986/ENSG00000137807/ENSG00000101057/ENSG00000198901/ENSG00000087586/ENSG00000088325/ENSG00000075702/ENSG00000166851/ENSG00000013810/ENSG00000134057/ENSG00000161800/ENSG00000117632/ENSG00000136122…
GO:0045787	BP	GO:0045787	positive regulation of cell cycle	86	0.666529211385164	2.62530275697549	0.000109745390693591	0.00208369508595242	0.001585761645388	593	tags=64%, list=22%, signal=52%	ENSG00000124882/ENSG00000129173/ENSG00000171848/ENSG00000125538/ENSG00000170312/ENSG00000175063/ENSG00000137804/ENSG00000178999/ENSG00000126787/ENSG00000076382/ENSG00000118193/ENSG00000101447/ENSG00000138182/ENSG00000158402/ENSG00000080986/ENSG00000163235/ENSG00000137807/ENSG00000087586/ENSG00000142731/ENSG00000135476/ENSG00000111247/ENSG00000134057/ENSG00000143476/ENSG00000122966/ENSG00000146670…
GO:0007051	BP	GO:0007051	spindle organization	73	0.673037415594369	2.59383569917824	0.000111656989727557	0.00208369508595242	0.001585761645388	463	tags=53%, list=17%, signal=46%	ENSG00000117650/ENSG00000066279/ENSG00000112742/ENSG00000138778/ENSG00000143228/ENSG00000152253/ENSG00000178999/ENSG00000126787/ENSG00000076382/ENSG00000152503/ENSG00000117399/ENSG00000237649/ENSG00000090889/ENSG00000163808/ENSG00000138160/ENSG00000080986/ENSG00000137807/ENSG00000101057/ENSG00000198901/ENSG00000087586/ENSG00000088325/ENSG00000075702/ENSG00000135476/ENSG00000157456/ENSG00000166851…
GO:0051321	BP	GO:0051321	meiotic cell cycle	86	0.657416793265232	2.58941107210356	0.000109745390693591	0.00208369508595242	0.001585761645388	498	tags=59%, list=18%, signal=50%	ENSG00000124882/ENSG00000117650/ENSG00000121621/ENSG00000066279/ENSG00000112742/ENSG00000156970/ENSG00000129810/ENSG00000131747/ENSG00000143228/ENSG00000121152/ENSG00000169679/ENSG00000117399/ENSG00000158402/ENSG00000156509/ENSG00000080986/ENSG00000174371/ENSG00000185697/ENSG00000163535/ENSG00000087586/ENSG00000136492/ENSG00000135476/ENSG00000111247/ENSG00000085999/ENSG00000157456/ENSG00000166851…
GO:0072686	CC	GO:0072686	mitotic spindle	57	0.698291518456957	2.58798241579688	0.000115942028985507	0.00208369508595242	0.001585761645388	249	tags=47%, list=9%, signal=44%	ENSG00000169607/ENSG00000154839/ENSG00000170312/ENSG00000121621/ENSG00000066279/ENSG00000138778/ENSG00000186185/ENSG00000137804/ENSG00000178999/ENSG00000076382/ENSG00000237649/ENSG00000101447/ENSG00000165480/ENSG00000138182/ENSG00000138160/ENSG00000137807/ENSG00000198901/ENSG00000087586/ENSG00000088325/ENSG00000075702/ENSG00000135476/ENSG00000166851/ENSG00000013810/ENSG00000161800/ENSG00000164109…
GO:0007346	BP	GO:0007346	regulation of mitotic cell cycle	144	0.620904824784764	2.5828677441017	0.000104155817102385	0.00208369508595242	0.001585761645388	521	tags=52%, list=19%, signal=45%	ENSG00000124882/ENSG00000148773/ENSG00000171848/ENSG00000117650/ENSG00000125538/ENSG00000170312/ENSG00000112742/ENSG00000108691/ENSG00000138778/ENSG00000117724/ENSG00000156970/ENSG00000175063/ENSG00000137804/ENSG00000169679/ENSG00000178999/ENSG00000126787/ENSG00000075218/ENSG00000011426/ENSG00000118193/ENSG00000138182/ENSG00000158402/ENSG00000156509/ENSG00000080986/ENSG00000163235/ENSG00000087586…
GO:1901987	BP	GO:1901987	regulation of cell cycle phase transition	128	0.627110182461878	2.58179678065171	0.00010495382031906	0.00208369508595242	0.001585761645388	521	tags=53%, list=19%, signal=45%	ENSG00000171848/ENSG00000170312/ENSG00000112742/ENSG00000108691/ENSG00000138778/ENSG00000117724/ENSG00000156970/ENSG00000175063/ENSG00000169679/ENSG00000178999/ENSG00000126787/ENSG00000075218/ENSG00000011426/ENSG00000118193/ENSG00000101447/ENSG00000158402/ENSG00000080986/ENSG00000093009/ENSG00000087586/ENSG00000092853/ENSG00000136492/ENSG00000197299/ENSG00000135476/ENSG00000166851/ENSG00000134057…
GO:0044770	BP	GO:0044770	cell cycle phase transition	163	0.613403673063992	2.57670841303183	0.000103412616339193	0.00208369508595242	0.001585761645388	521	tags=51%, list=19%, signal=44%	ENSG00000171848/ENSG00000170312/ENSG00000112742/ENSG00000108691/ENSG00000138778/ENSG00000117724/ENSG00000156970/ENSG00000175063/ENSG00000169679/ENSG00000178999/ENSG00000126787/ENSG00000075218/ENSG00000011426/ENSG00000183856/ENSG00000118193/ENSG00000101447/ENSG00000158402/ENSG00000080986/ENSG00000093009/ENSG00000087586/ENSG00000092853/ENSG00000136492/ENSG00000100526/ENSG00000197299/ENSG00000135476…
GO:0051983	BP	GO:0051983	regulation of chromosome segregation	41	0.732111854805499	2.55680748161897	0.00012132977432662	0.00208369508595242	0.001585761645388	508	tags=71%, list=18%, signal=59%	ENSG00000148773/ENSG00000112742/ENSG00000138778/ENSG00000117724/ENSG00000156970/ENSG00000175063/ENSG00000169679/ENSG00000178999/ENSG00000126787/ENSG00000142945/ENSG00000080986/ENSG00000135476/ENSG00000166851/ENSG00000164611/ENSG00000013810/ENSG00000134057/ENSG00000184661/ENSG00000071539/ENSG00000122952/ENSG00000164109/ENSG00000094804/ENSG00000167513/ENSG00000112029/ENSG00000174442/ENSG00000184445…
GO:0061982	BP	GO:0061982	meiosis I cell cycle process	40	0.732977828583066	2.55146323497704	0.000121624908781318	0.00208369508595242	0.001585761645388	358	tags=62%, list=13%, signal=55%	ENSG00000129810/ENSG00000131747/ENSG00000158402/ENSG00000080986/ENSG00000185697/ENSG00000163535/ENSG00000087586/ENSG00000136492/ENSG00000135476/ENSG00000111247/ENSG00000085999/ENSG00000157456/ENSG00000166851/ENSG00000164611/ENSG00000100206/ENSG00000154920/ENSG00000071539/ENSG00000121211/ENSG00000175305/ENSG00000144554/ENSG00000164045/ENSG00000123975/ENSG00000131470/ENSG00000112029/ENSG00000139618
GO:0051304	BP	GO:0051304	chromosome separation	42	0.724744929833397	2.54441254597743	0.000121153380179307	0.00208369508595242	0.001585761645388	365	tags=60%, list=13%, signal=52%	ENSG00000112742/ENSG00000138778/ENSG00000117724/ENSG00000156970/ENSG00000175063/ENSG00000131747/ENSG00000121152/ENSG00000169679/ENSG00000178999/ENSG00000126787/ENSG00000080986/ENSG00000135476/ENSG00000166851/ENSG00000164611/ENSG00000013810/ENSG00000134057/ENSG00000154920/ENSG00000071539/ENSG00000122952/ENSG00000164109/ENSG00000094804/ENSG00000167513/ENSG00000112029/ENSG00000174442/ENSG00000184445
GO:0003777	MF	GO:0003777	microtubule motor activity	18	0.861343648317877	2.53203578809746	0.000136500136500137	0.00208369508595242	0.001585761645388	242	tags=78%, list=9%, signal=71%	ENSG00000121621/ENSG00000138778/ENSG00000186185/ENSG00000142945/ENSG00000118193/ENSG00000237649/ENSG00000090889/ENSG00000163808/ENSG00000138182/ENSG00000138160/ENSG00000137807/ENSG00000112984/ENSG00000186638/ENSG00000079616
GO:0044772	BP	GO:0044772	mitotic cell cycle phase transition	141	0.606966151907809	2.52037740175601	0.00010436234606554	0.00208369508595242	0.001585761645388	521	tags=50%, list=19%, signal=43%	ENSG00000171848/ENSG00000170312/ENSG00000112742/ENSG00000108691/ENSG00000138778/ENSG00000117724/ENSG00000156970/ENSG00000175063/ENSG00000169679/ENSG00000178999/ENSG00000126787/ENSG00000075218/ENSG00000011426/ENSG00000183856/ENSG00000118193/ENSG00000158402/ENSG00000080986/ENSG00000087586/ENSG00000092853/ENSG00000100526/ENSG00000197299/ENSG00000135476/ENSG00000157456/ENSG00000166851/ENSG00000013810…
GO:0000075	BP	GO:0000075	cell cycle checkpoint signaling	64	0.664409030837326	2.51054911597435	0.000113817436831323	0.00208369508595242	0.001585761645388	508	tags=56%, list=18%, signal=47%	ENSG00000170312/ENSG00000112742/ENSG00000117724/ENSG00000156970/ENSG00000169679/ENSG00000178999/ENSG00000075218/ENSG00000080986/ENSG00000093009/ENSG00000092853/ENSG00000136492/ENSG00000197299/ENSG00000166851/ENSG00000134057/ENSG00000154920/ENSG00000143476/ENSG00000071539/ENSG00000012048/ENSG00000122952/ENSG00000144554/ENSG00000164109/ENSG00000085840/ENSG00000094804/ENSG00000092470/ENSG00000101412…
GO:0010948	BP	GO:0010948	negative regulation of cell cycle process	97	0.628439869445097	2.5099049827678	0.000107909787417719	0.00208369508595242	0.001585761645388	521	tags=54%, list=19%, signal=45%	ENSG00000129173/ENSG00000117650/ENSG00000170312/ENSG00000112742/ENSG00000108691/ENSG00000117724/ENSG00000156970/ENSG00000169679/ENSG00000178999/ENSG00000075218/ENSG00000156509/ENSG00000080986/ENSG00000093009/ENSG00000092853/ENSG00000136492/ENSG00000197299/ENSG00000135476/ENSG00000166851/ENSG00000164611/ENSG00000134057/ENSG00000154920/ENSG00000143476/ENSG00000071539/ENSG00000128342/ENSG00000012048…
GO:0010965	BP	GO:0010965	regulation of mitotic sister chromatid separation	33	0.748281516244534	2.5076786633077	0.000124703828407532	0.00208369508595242	0.001585761645388	422	tags=70%, list=15%, signal=60%	ENSG00000112742/ENSG00000138778/ENSG00000117724/ENSG00000156970/ENSG00000175063/ENSG00000169679/ENSG00000178999/ENSG00000126787/ENSG00000080986/ENSG00000135476/ENSG00000166851/ENSG00000164611/ENSG00000013810/ENSG00000134057/ENSG00000071539/ENSG00000122952/ENSG00000164109/ENSG00000094804/ENSG00000167513/ENSG00000112029/ENSG00000174442/ENSG00000184445/ENSG00000178295
GO:1905818	BP	GO:1905818	regulation of chromosome separation	33	0.748281516244534	2.5076786633077	0.000124703828407532	0.00208369508595242	0.001585761645388	422	tags=70%, list=15%, signal=60%	ENSG00000112742/ENSG00000138778/ENSG00000117724/ENSG00000156970/ENSG00000175063/ENSG00000169679/ENSG00000178999/ENSG00000126787/ENSG00000080986/ENSG00000135476/ENSG00000166851/ENSG00000164611/ENSG00000013810/ENSG00000134057/ENSG00000071539/ENSG00000122952/ENSG00000164109/ENSG00000094804/ENSG00000167513/ENSG00000112029/ENSG00000174442/ENSG00000184445/ENSG00000178295
GO:1901990	BP	GO:1901990	regulation of mitotic cell cycle phase transition	105	0.621573081436246	2.50414779302688	0.000107100781835707	0.00208369508595242	0.001585761645388	539	tags=53%, list=20%, signal=45%	ENSG00000171848/ENSG00000170312/ENSG00000112742/ENSG00000108691/ENSG00000138778/ENSG00000117724/ENSG00000156970/ENSG00000175063/ENSG00000169679/ENSG00000178999/ENSG00000126787/ENSG00000075218/ENSG00000011426/ENSG00000118193/ENSG00000158402/ENSG00000080986/ENSG00000087586/ENSG00000092853/ENSG00000197299/ENSG00000135476/ENSG00000166851/ENSG00000134057/ENSG00000143476/ENSG00000071539/ENSG00000146670…
GO:0050000	BP	GO:0050000	chromosome localization	31	0.756667378180903	2.50240383615218	0.000125565042692115	0.00208369508595242	0.001585761645388	333	tags=61%, list=12%, signal=54%	ENSG00000121621/ENSG00000138778/ENSG00000117724/ENSG00000143228/ENSG00000178999/ENSG00000126787/ENSG00000076382/ENSG00000142945/ENSG00000118193/ENSG00000237649/ENSG00000101447/ENSG00000134690/ENSG00000080986/ENSG00000134057/ENSG00000146670/ENSG00000079616/ENSG00000167513/ENSG00000149503/ENSG00000134222
GO:0051303	BP	GO:0051303	establishment of chromosome localization	31	0.756667378180903	2.50240383615218	0.000125565042692115	0.00208369508595242	0.001585761645388	333	tags=61%, list=12%, signal=54%	ENSG00000121621/ENSG00000138778/ENSG00000117724/ENSG00000143228/ENSG00000178999/ENSG00000126787/ENSG00000076382/ENSG00000142945/ENSG00000118193/ENSG00000237649/ENSG00000101447/ENSG00000134690/ENSG00000080986/ENSG00000134057/ENSG00000146670/ENSG00000079616/ENSG00000167513/ENSG00000149503/ENSG00000134222
GO:0051306	BP	GO:0051306	mitotic sister chromatid separation	34	0.742019105512303	2.50118565482462	0.000124409056979348	0.00208369508595242	0.001585761645388	422	tags=68%, list=15%, signal=58%	ENSG00000112742/ENSG00000138778/ENSG00000117724/ENSG00000156970/ENSG00000175063/ENSG00000169679/ENSG00000178999/ENSG00000126787/ENSG00000080986/ENSG00000135476/ENSG00000166851/ENSG00000164611/ENSG00000013810/ENSG00000134057/ENSG00000071539/ENSG00000122952/ENSG00000164109/ENSG00000094804/ENSG00000167513/ENSG00000112029/ENSG00000174442/ENSG00000184445/ENSG00000178295
GO:0000281	BP	GO:0000281	mitotic cytokinesis	21	0.82234563560561	2.500433162315	0.000133386688008537	0.00208369508595242	0.001585761645388	323	tags=81%, list=12%, signal=72%	ENSG00000137804/ENSG00000115163/ENSG00000152503/ENSG00000011426/ENSG00000090889/ENSG00000138180/ENSG00000138182/ENSG00000137807/ENSG00000112984/ENSG00000135476/ENSG00000166851/ENSG00000122966/ENSG00000136108/ENSG00000161800/ENSG00000117632/ENSG00000114346/ENSG00000149503
GO:0000910	BP	GO:0000910	cytokinesis	43	0.707687084154377	2.49612067280906	0.000120627261761158	0.00208369508595242	0.001585761645388	358	tags=58%, list=13%, signal=51%	ENSG00000129173/ENSG00000137804/ENSG00000178999/ENSG00000115163/ENSG00000152503/ENSG00000011426/ENSG00000118193/ENSG00000090889/ENSG00000138180/ENSG00000138182/ENSG00000137807/ENSG00000198901/ENSG00000087586/ENSG00000112984/ENSG00000142731/ENSG00000135476/ENSG00000166851/ENSG00000122966/ENSG00000136108/ENSG00000161800/ENSG00000094804/ENSG00000117632/ENSG00000114346/ENSG00000149503/ENSG00000139618
GO:0033045	BP	GO:0033045	regulation of sister chromatid segregation	35	0.73401837948485	2.48814446011655	0.000123716441915131	0.00208369508595242	0.001585761645388	457	tags=69%, list=17%, signal=58%	ENSG00000112742/ENSG00000138778/ENSG00000117724/ENSG00000156970/ENSG00000175063/ENSG00000169679/ENSG00000178999/ENSG00000126787/ENSG00000080986/ENSG00000135476/ENSG00000166851/ENSG00000164611/ENSG00000013810/ENSG00000134057/ENSG00000071539/ENSG00000122952/ENSG00000164109/ENSG00000094804/ENSG00000167513/ENSG00000112029/ENSG00000174442/ENSG00000184445/ENSG00000178295/ENSG00000175643
GO:0051310	BP	GO:0051310	metaphase plate congression	29	0.762572542601857	2.48755187412697	0.000126968004062976	0.00208369508595242	0.001585761645388	508	tags=72%, list=18%, signal=60%	ENSG00000121621/ENSG00000138778/ENSG00000117724/ENSG00000143228/ENSG00000178999/ENSG00000076382/ENSG00000142945/ENSG00000118193/ENSG00000237649/ENSG00000101447/ENSG00000134690/ENSG00000080986/ENSG00000134057/ENSG00000146670/ENSG00000079616/ENSG00000167513/ENSG00000149503/ENSG00000134222/ENSG00000213024/ENSG00000031691/ENSG00000040275
GO:0007127	BP	GO:0007127	meiosis I	38	0.721733586461161	2.48680821611621	0.000122729504172803	0.00208369508595242	0.001585761645388	358	tags=61%, list=13%, signal=53%	ENSG00000129810/ENSG00000131747/ENSG00000080986/ENSG00000185697/ENSG00000163535/ENSG00000087586/ENSG00000136492/ENSG00000135476/ENSG00000111247/ENSG00000085999/ENSG00000157456/ENSG00000166851/ENSG00000164611/ENSG00000100206/ENSG00000154920/ENSG00000071539/ENSG00000121211/ENSG00000175305/ENSG00000144554/ENSG00000123975/ENSG00000131470/ENSG00000112029/ENSG00000139618
GO:0007091	BP	GO:0007091	metaphase/anaphase transition of mitotic cell cycle	32	0.743743839078909	2.4761868264666	0.000125219133483596	0.00208369508595242	0.001585761645388	422	tags=69%, list=15%, signal=59%	ENSG00000112742/ENSG00000138778/ENSG00000117724/ENSG00000156970/ENSG00000175063/ENSG00000169679/ENSG00000178999/ENSG00000126787/ENSG00000080986/ENSG00000135476/ENSG00000166851/ENSG00000013810/ENSG00000134057/ENSG00000071539/ENSG00000122952/ENSG00000164109/ENSG00000094804/ENSG00000167513/ENSG00000112029/ENSG00000174442/ENSG00000184445/ENSG00000178295
GO:0044784	BP	GO:0044784	metaphase/anaphase transition of cell cycle	32	0.743743839078909	2.4761868264666	0.000125219133483596	0.00208369508595242	0.001585761645388	422	tags=69%, list=15%, signal=59%	ENSG00000112742/ENSG00000138778/ENSG00000117724/ENSG00000156970/ENSG00000175063/ENSG00000169679/ENSG00000178999/ENSG00000126787/ENSG00000080986/ENSG00000135476/ENSG00000166851/ENSG00000013810/ENSG00000134057/ENSG00000071539/ENSG00000122952/ENSG00000164109/ENSG00000094804/ENSG00000167513/ENSG00000112029/ENSG00000174442/ENSG00000184445/ENSG00000178295
GO:0008017	MF	GO:0008017	microtubule binding	69	0.64453932286714	2.46272903046022	0.000112790435371081	0.00208369508595242	0.001585761645388	333	tags=45%, list=12%, signal=41%	ENSG00000154839/ENSG00000121621/ENSG00000138778/ENSG00000117724/ENSG00000186185/ENSG00000137804/ENSG00000126787/ENSG00000076382/ENSG00000075218/ENSG00000142945/ENSG00000118193/ENSG00000237649/ENSG00000101447/ENSG00000090889/ENSG00000163808/ENSG00000138182/ENSG00000138160/ENSG00000137807/ENSG00000198901/ENSG00000089685/ENSG00000088325/ENSG00000112984/ENSG00000166851/ENSG00000161800/ENSG00000186638…
GO:0008608	BP	GO:0008608	attachment of spindle microtubules to kinetochore	25	0.777372733207812	2.46163361270725	0.00012923235978289	0.00208369508595242	0.001585761645388	307	tags=60%, list=11%, signal=54%	ENSG00000117650/ENSG00000138778/ENSG00000129810/ENSG00000143228/ENSG00000137812/ENSG00000152253/ENSG00000178999/ENSG00000076382/ENSG00000142945/ENSG00000080986/ENSG00000134057/ENSG00000161800/ENSG00000161888/ENSG00000114346/ENSG00000167513
GO:0090307	BP	GO:0090307	mitotic spindle assembly	24	0.784327991619137	2.46090946969255	0.000130039011703511	0.00208369508595242	0.001585761645388	218	tags=54%, list=8%, signal=50%	ENSG00000117650/ENSG00000178999/ENSG00000117399/ENSG00000237649/ENSG00000090889/ENSG00000163808/ENSG00000138160/ENSG00000137807/ENSG00000101057/ENSG00000198901/ENSG00000088325/ENSG00000166851/ENSG00000161800
GO:0000922	CC	GO:0000922	spindle pole	60	0.658287084768684	2.46008470207555	0.000114968958381237	0.00208369508595242	0.001585761645388	453	tags=52%, list=16%, signal=44%	ENSG00000169607/ENSG00000117650/ENSG00000066279/ENSG00000117724/ENSG00000129810/ENSG00000178999/ENSG00000126787/ENSG00000076382/ENSG00000117399/ENSG00000101447/ENSG00000138182/ENSG00000138160/ENSG00000198901/ENSG00000087586/ENSG00000088325/ENSG00000075702/ENSG00000142731/ENSG00000166851/ENSG00000013810/ENSG00000134057/ENSG00000127423/ENSG00000136108/ENSG00000164109/ENSG00000094804/ENSG00000100629…
GO:1901989	BP	GO:1901989	positive regulation of cell cycle phase transition	32	0.738739898044211	2.45952693334281	0.000125219133483596	0.00208369508595242	0.001585761645388	556	tags=75%, list=20%, signal=61%	ENSG00000171848/ENSG00000170312/ENSG00000175063/ENSG00000126787/ENSG00000101447/ENSG00000158402/ENSG00000135476/ENSG00000134057/ENSG00000143476/ENSG00000146670/ENSG00000094804/ENSG00000164045/ENSG00000106462/ENSG00000167513/ENSG00000123473/ENSG00000161692/ENSG00000112029/ENSG00000167325/ENSG00000156876/ENSG00000151849/ENSG00000176208/ENSG00000172167/ENSG00000097046/ENSG00000121068
GO:0006261	BP	GO:0006261	DNA-templated DNA replication	79	0.630053469098405	2.45426447071791	0.00011059500110595	0.00208369508595242	0.001585761645388	750	tags=73%, list=27%, signal=55%	ENSG00000129173/ENSG00000065328/ENSG00000093009/ENSG00000051341/ENSG00000197299/ENSG00000154920/ENSG00000131153/ENSG00000175305/ENSG00000085840/ENSG00000094804/ENSG00000091651/ENSG00000147536/ENSG00000198056/ENSG00000133119/ENSG00000167513/ENSG00000101003/ENSG00000160957/ENSG00000100297/ENSG00000161692/ENSG00000127586/ENSG00000138658/ENSG00000112029/ENSG00000006634/ENSG00000139618/ENSG00000014138…
GO:0000226	BP	GO:0000226	microtubule cytoskeleton organization	154	0.586377792551145	2.45236151570119	0.000103788271925272	0.00208369508595242	0.001585761645388	604	tags=49%, list=22%, signal=41%	ENSG00000117650/ENSG00000154839/ENSG00000170312/ENSG00000121621/ENSG00000066279/ENSG00000112742/ENSG00000138778/ENSG00000129810/ENSG00000143228/ENSG00000186185/ENSG00000137804/ENSG00000152253/ENSG00000178999/ENSG00000126787/ENSG00000076382/ENSG00000115163/ENSG00000152503/ENSG00000117399/ENSG00000142945/ENSG00000237649/ENSG00000090889/ENSG00000163808/ENSG00000165480/ENSG00000138160/ENSG00000080986…
GO:0061640	BP	GO:0061640	cytoskeleton-dependent cytokinesis	26	0.767397686085964	2.44926864792642	0.000128584287000129	0.00208369508595242	0.001585761645388	323	tags=69%, list=12%, signal=62%	ENSG00000137804/ENSG00000178999/ENSG00000115163/ENSG00000152503/ENSG00000011426/ENSG00000090889/ENSG00000138180/ENSG00000138182/ENSG00000137807/ENSG00000112984/ENSG00000135476/ENSG00000166851/ENSG00000122966/ENSG00000136108/ENSG00000161800/ENSG00000117632/ENSG00000114346/ENSG00000149503
GO:0030071	BP	GO:0030071	regulation of mitotic metaphase/anaphase transition	31	0.73891886609556	2.44370704809303	0.000125565042692115	0.00208369508595242	0.001585761645388	422	tags=68%, list=15%, signal=58%	ENSG00000112742/ENSG00000138778/ENSG00000117724/ENSG00000156970/ENSG00000175063/ENSG00000169679/ENSG00000178999/ENSG00000126787/ENSG00000080986/ENSG00000135476/ENSG00000166851/ENSG00000134057/ENSG00000071539/ENSG00000122952/ENSG00000164109/ENSG00000094804/ENSG00000167513/ENSG00000112029/ENSG00000174442/ENSG00000184445/ENSG00000178295
GO:1902099	BP	GO:1902099	regulation of metaphase/anaphase transition of cell cycle	31	0.73891886609556	2.44370704809303	0.000125565042692115	0.00208369508595242	0.001585761645388	422	tags=68%, list=15%, signal=58%	ENSG00000112742/ENSG00000138778/ENSG00000117724/ENSG00000156970/ENSG00000175063/ENSG00000169679/ENSG00000178999/ENSG00000126787/ENSG00000080986/ENSG00000135476/ENSG00000166851/ENSG00000134057/ENSG00000071539/ENSG00000122952/ENSG00000164109/ENSG00000094804/ENSG00000167513/ENSG00000112029/ENSG00000174442/ENSG00000184445/ENSG00000178295
GO:0030496	CC	GO:0030496	midbody	54	0.661965117827012	2.43361751189952	0.000116522955022139	0.00208369508595242	0.001585761645388	333	tags=46%, list=12%, signal=42%	ENSG00000117650/ENSG00000170312/ENSG00000066279/ENSG00000138778/ENSG00000117724/ENSG00000178999/ENSG00000076382/ENSG00000011426/ENSG00000118193/ENSG00000090889/ENSG00000138180/ENSG00000138182/ENSG00000134690/ENSG00000137807/ENSG00000171241/ENSG00000198901/ENSG00000087586/ENSG00000089685/ENSG00000112984/ENSG00000166851/ENSG00000122966/ENSG00000161800/ENSG00000114346/ENSG00000149503/ENSG00000134222
GO:0051784	BP	GO:0051784	negative regulation of nuclear division	26	0.761977685545233	2.43196987619848	0.000128584287000129	0.00208369508595242	0.001585761645388	521	tags=81%, list=19%, signal=66%	ENSG00000112742/ENSG00000117724/ENSG00000156970/ENSG00000169679/ENSG00000178999/ENSG00000156509/ENSG00000080986/ENSG00000166851/ENSG00000134057/ENSG00000071539/ENSG00000128342/ENSG00000122952/ENSG00000164109/ENSG00000167513/ENSG00000112029/ENSG00000174442/ENSG00000184445/ENSG00000178295/ENSG00000143452/ENSG00000040275/ENSG00000172167
GO:1901988	BP	GO:1901988	negative regulation of cell cycle phase transition	85	0.616361837593794	2.42458257245033	0.000109805644010102	0.00208369508595242	0.001585761645388	508	tags=52%, list=18%, signal=44%	ENSG00000170312/ENSG00000112742/ENSG00000108691/ENSG00000117724/ENSG00000156970/ENSG00000169679/ENSG00000178999/ENSG00000075218/ENSG00000080986/ENSG00000093009/ENSG00000092853/ENSG00000136492/ENSG00000197299/ENSG00000166851/ENSG00000134057/ENSG00000154920/ENSG00000143476/ENSG00000071539/ENSG00000012048/ENSG00000122952/ENSG00000144554/ENSG00000164109/ENSG00000085840/ENSG00000094804/ENSG00000092470…
GO:0045132	BP	GO:0045132	meiotic chromosome segregation	32	0.7270725925006	2.42068233824239	0.000125219133483596	0.00208369508595242	0.001585761645388	301	tags=56%, list=11%, signal=51%	ENSG00000112742/ENSG00000156970/ENSG00000129810/ENSG00000131747/ENSG00000143228/ENSG00000121152/ENSG00000169679/ENSG00000163535/ENSG00000136492/ENSG00000135476/ENSG00000166851/ENSG00000164611/ENSG00000100206/ENSG00000154920/ENSG00000071539/ENSG00000175305/ENSG00000144554/ENSG00000131470
GO:0044839	BP	GO:0044839	cell cycle G2/M phase transition	48	0.668728222037064	2.40762291841628	0.000118427285646613	0.00208369508595242	0.001585761645388	346	tags=54%, list=13%, signal=48%	ENSG00000170312/ENSG00000117724/ENSG00000178999/ENSG00000118193/ENSG00000158402/ENSG00000080986/ENSG00000087586/ENSG00000092853/ENSG00000197299/ENSG00000157456/ENSG00000166851/ENSG00000127564/ENSG00000134057/ENSG00000145386/ENSG00000143476/ENSG00000122966/ENSG00000012048/ENSG00000085840/ENSG00000094804/ENSG00000164045/ENSG00000165304/ENSG00000149948/ENSG00000120539/ENSG00000111206/ENSG00000161692…
GO:0051233	CC	GO:0051233	spindle midzone	18	0.818548490512113	2.40623365171079	0.000136500136500137	0.00208369508595242	0.001585761645388	323	tags=72%, list=12%, signal=64%	ENSG00000121621/ENSG00000138778/ENSG00000186185/ENSG00000178999/ENSG00000118193/ENSG00000138182/ENSG00000134690/ENSG00000198901/ENSG00000087586/ENSG00000166851/ENSG00000161800/ENSG00000094804/ENSG00000149503
GO:0045786	BP	GO:0045786	negative regulation of cell cycle	112	0.59079773459802	2.39744484102906	0.000106337728626117	0.00208369508595242	0.001585761645388	521	tags=51%, list=19%, signal=43%	ENSG00000129173/ENSG00000117650/ENSG00000170312/ENSG00000112742/ENSG00000108691/ENSG00000117724/ENSG00000156970/ENSG00000169679/ENSG00000118503/ENSG00000178999/ENSG00000075218/ENSG00000156509/ENSG00000080986/ENSG00000093009/ENSG00000092853/ENSG00000136492/ENSG00000197299/ENSG00000135476/ENSG00000166851/ENSG00000164611/ENSG00000134057/ENSG00000154920/ENSG00000143476/ENSG00000071539/ENSG00000128342…
GO:0033047	BP	GO:0033047	regulation of mitotic sister chromatid segregation	23	0.771207918006245	2.39616286345029	0.000131095962244363	0.00208369508595242	0.001585761645388	422	tags=74%, list=15%, signal=63%	ENSG00000112742/ENSG00000117724/ENSG00000156970/ENSG00000169679/ENSG00000178999/ENSG00000080986/ENSG00000166851/ENSG00000164611/ENSG00000134057/ENSG00000071539/ENSG00000122952/ENSG00000164109/ENSG00000167513/ENSG00000112029/ENSG00000174442/ENSG00000184445/ENSG00000178295
GO:0065004	BP	GO:0065004	protein-DNA complex assembly	43	0.67674596084718	2.38698659468849	0.000120627261761158	0.00208369508595242	0.001585761645388	560	tags=65%, list=20%, signal=53%	ENSG00000123485/ENSG00000138778/ENSG00000117724/ENSG00000126787/ENSG00000115163/ENSG00000093009/ENSG00000102384/ENSG00000197061/ENSG00000100206/ENSG00000105011/ENSG00000119969/ENSG00000104147/ENSG00000123219/ENSG00000167513/ENSG00000188486/ENSG00000138092/ENSG00000166451/ENSG00000184445/ENSG00000203760/ENSG00000164104/ENSG00000159055/ENSG00000051180/ENSG00000153044/ENSG00000167670/ENSG00000159259…
GO:0033046	BP	GO:0033046	negative regulation of sister chromatid segregation	22	0.776988601595461	2.38615865987518	0.000132678784662332	0.00208369508595242	0.001585761645388	422	tags=77%, list=15%, signal=66%	ENSG00000112742/ENSG00000117724/ENSG00000156970/ENSG00000169679/ENSG00000178999/ENSG00000080986/ENSG00000166851/ENSG00000164611/ENSG00000134057/ENSG00000071539/ENSG00000122952/ENSG00000164109/ENSG00000167513/ENSG00000112029/ENSG00000174442/ENSG00000184445/ENSG00000178295
GO:0033048	BP	GO:0033048	negative regulation of mitotic sister chromatid segregation	22	0.776988601595461	2.38615865987518	0.000132678784662332	0.00208369508595242	0.001585761645388	422	tags=77%, list=15%, signal=66%	ENSG00000112742/ENSG00000117724/ENSG00000156970/ENSG00000169679/ENSG00000178999/ENSG00000080986/ENSG00000166851/ENSG00000164611/ENSG00000134057/ENSG00000071539/ENSG00000122952/ENSG00000164109/ENSG00000167513/ENSG00000112029/ENSG00000174442/ENSG00000184445/ENSG00000178295
GO:0051985	BP	GO:0051985	negative regulation of chromosome segregation	22	0.776988601595461	2.38615865987518	0.000132678784662332	0.00208369508595242	0.001585761645388	422	tags=77%, list=15%, signal=66%	ENSG00000112742/ENSG00000117724/ENSG00000156970/ENSG00000169679/ENSG00000178999/ENSG00000080986/ENSG00000166851/ENSG00000164611/ENSG00000134057/ENSG00000071539/ENSG00000122952/ENSG00000164109/ENSG00000167513/ENSG00000112029/ENSG00000174442/ENSG00000184445/ENSG00000178295
GO:1905819	BP	GO:1905819	negative regulation of chromosome separation	22	0.776988601595461	2.38615865987518	0.000132678784662332	0.00208369508595242	0.001585761645388	422	tags=77%, list=15%, signal=66%	ENSG00000112742/ENSG00000117724/ENSG00000156970/ENSG00000169679/ENSG00000178999/ENSG00000080986/ENSG00000166851/ENSG00000164611/ENSG00000134057/ENSG00000071539/ENSG00000122952/ENSG00000164109/ENSG00000167513/ENSG00000112029/ENSG00000174442/ENSG00000184445/ENSG00000178295
GO:2000816	BP	GO:2000816	negative regulation of mitotic sister chromatid separation	22	0.776988601595461	2.38615865987518	0.000132678784662332	0.00208369508595242	0.001585761645388	422	tags=77%, list=15%, signal=66%	ENSG00000112742/ENSG00000117724/ENSG00000156970/ENSG00000169679/ENSG00000178999/ENSG00000080986/ENSG00000166851/ENSG00000164611/ENSG00000134057/ENSG00000071539/ENSG00000122952/ENSG00000164109/ENSG00000167513/ENSG00000112029/ENSG00000174442/ENSG00000184445/ENSG00000178295
GO:0007093	BP	GO:0007093	mitotic cell cycle checkpoint signaling	52	0.652215910453121	2.38255035592697	0.000117178345441762	0.00208369508595242	0.001585761645388	365	tags=48%, list=13%, signal=43%	ENSG00000170312/ENSG00000112742/ENSG00000117724/ENSG00000156970/ENSG00000169679/ENSG00000178999/ENSG00000075218/ENSG00000080986/ENSG00000092853/ENSG00000197299/ENSG00000166851/ENSG00000134057/ENSG00000154920/ENSG00000143476/ENSG00000071539/ENSG00000012048/ENSG00000122952/ENSG00000144554/ENSG00000164109/ENSG00000085840/ENSG00000094804/ENSG00000149948/ENSG00000167513/ENSG00000174442/ENSG00000184445
GO:0045931	BP	GO:0045931	positive regulation of mitotic cell cycle	33	0.710078922651128	2.37965220968367	0.000124703828407532	0.00208369508595242	0.001585761645388	539	tags=67%, list=20%, signal=54%	ENSG00000171848/ENSG00000170312/ENSG00000175063/ENSG00000126787/ENSG00000158402/ENSG00000135476/ENSG00000134057/ENSG00000143476/ENSG00000146670/ENSG00000094804/ENSG00000164045/ENSG00000167513/ENSG00000123473/ENSG00000161692/ENSG00000112029/ENSG00000139618/ENSG00000167325/ENSG00000156876/ENSG00000151849/ENSG00000167034/ENSG00000172167/ENSG00000097046
GO:0006260	BP	GO:0006260	DNA replication	117	0.582984312621561	2.37894476555979	0.000105876124933827	0.00208369508595242	0.001585761645388	750	tags=62%, list=27%, signal=47%	ENSG00000124882/ENSG00000129173/ENSG00000171848/ENSG00000170312/ENSG00000171320/ENSG00000065328/ENSG00000189057/ENSG00000093009/ENSG00000051341/ENSG00000197299/ENSG00000154920/ENSG00000145386/ENSG00000143476/ENSG00000131153/ENSG00000175305/ENSG00000166803/ENSG00000085840/ENSG00000094804/ENSG00000091651/ENSG00000147536/ENSG00000198056/ENSG00000133119/ENSG00000167513/ENSG00000101003/ENSG00000160957…
GO:0003774	MF	GO:0003774	cytoskeletal motor activity	22	0.774572833404515	2.37873975285745	0.000132678784662332	0.00208369508595242	0.001585761645388	242	tags=64%, list=9%, signal=59%	ENSG00000121621/ENSG00000138778/ENSG00000186185/ENSG00000142945/ENSG00000118193/ENSG00000237649/ENSG00000090889/ENSG00000163808/ENSG00000138182/ENSG00000138160/ENSG00000137807/ENSG00000112984/ENSG00000186638/ENSG00000079616
GO:1901992	BP	GO:1901992	positive regulation of mitotic cell cycle phase transition	28	0.733553262049946	2.37435991926002	0.000127713920817369	0.00208369508595242	0.001585761645388	539	tags=71%, list=20%, signal=58%	ENSG00000171848/ENSG00000170312/ENSG00000175063/ENSG00000126787/ENSG00000158402/ENSG00000135476/ENSG00000134057/ENSG00000143476/ENSG00000146670/ENSG00000094804/ENSG00000164045/ENSG00000167513/ENSG00000123473/ENSG00000161692/ENSG00000112029/ENSG00000167325/ENSG00000156876/ENSG00000151849/ENSG00000172167/ENSG00000097046
GO:0000086	BP	GO:0000086	G2/M transition of mitotic cell cycle	45	0.665410676923855	2.37183091891197	0.000119246362985929	0.00208369508595242	0.001585761645388	346	tags=53%, list=13%, signal=47%	ENSG00000170312/ENSG00000117724/ENSG00000178999/ENSG00000118193/ENSG00000158402/ENSG00000087586/ENSG00000092853/ENSG00000197299/ENSG00000166851/ENSG00000127564/ENSG00000134057/ENSG00000145386/ENSG00000143476/ENSG00000122966/ENSG00000012048/ENSG00000085840/ENSG00000094804/ENSG00000164045/ENSG00000165304/ENSG00000149948/ENSG00000120539/ENSG00000111206/ENSG00000161692/ENSG00000112029
GO:0051225	BP	GO:0051225	spindle assembly	44	0.66659727847898	2.36514058397924	0.000119961612284069	0.00208369508595242	0.001585761645388	346	tags=45%, list=13%, signal=40%	ENSG00000117650/ENSG00000066279/ENSG00000178999/ENSG00000076382/ENSG00000117399/ENSG00000237649/ENSG00000090889/ENSG00000163808/ENSG00000138160/ENSG00000080986/ENSG00000137807/ENSG00000101057/ENSG00000198901/ENSG00000087586/ENSG00000088325/ENSG00000157456/ENSG00000166851/ENSG00000161800/ENSG00000149503/ENSG00000112029
GO:0007017	BP	GO:0007017	microtubule-based process	175	0.557484895783476	2.35365969049028	0.000102965403624382	0.00208369508595242	0.001585761645388	615	tags=46%, list=22%, signal=38%	ENSG00000117650/ENSG00000154839/ENSG00000170312/ENSG00000121621/ENSG00000066279/ENSG00000112742/ENSG00000138778/ENSG00000129810/ENSG00000143228/ENSG00000186185/ENSG00000137804/ENSG00000152253/ENSG00000178999/ENSG00000126787/ENSG00000076382/ENSG00000115163/ENSG00000152503/ENSG00000075218/ENSG00000117399/ENSG00000142945/ENSG00000118193/ENSG00000237649/ENSG00000090889/ENSG00000163808/ENSG00000165480…
GO:0005876	CC	GO:0005876	spindle microtubule	28	0.726477599943415	2.35145746707675	0.000127713920817369	0.00208369508595242	0.001585761645388	152	tags=46%, list=6%, signal=44%	ENSG00000154839/ENSG00000170312/ENSG00000121621/ENSG00000138778/ENSG00000186185/ENSG00000178999/ENSG00000090889/ENSG00000165480/ENSG00000138160/ENSG00000198901/ENSG00000087586/ENSG00000089685/ENSG00000166851
GO:0033044	BP	GO:0033044	regulation of chromosome organization	72	0.611930240464269	2.35133481166379	0.000112183082791115	0.00208369508595242	0.001585761645388	608	tags=53%, list=22%, signal=42%	ENSG00000117650/ENSG00000109805/ENSG00000112742/ENSG00000138778/ENSG00000117724/ENSG00000156970/ENSG00000175063/ENSG00000131747/ENSG00000121152/ENSG00000169679/ENSG00000178999/ENSG00000126787/ENSG00000080986/ENSG00000135476/ENSG00000166851/ENSG00000164611/ENSG00000013810/ENSG00000134057/ENSG00000071539/ENSG00000146670/ENSG00000122952/ENSG00000164109/ENSG00000094804/ENSG00000167513/ENSG00000112029…
GO:0005126	MF	GO:0005126	cytokine receptor binding	52	0.643617567925568	2.35114053638551	0.000117178345441762	0.00208369508595242	0.001585761645388	695	tags=69%, list=25%, signal=53%	ENSG00000169245/ENSG00000169248/ENSG00000271503/ENSG00000138755/ENSG00000169429/ENSG00000125538/ENSG00000124875/ENSG00000108691/ENSG00000145777/ENSG00000113494/ENSG00000056558/ENSG00000128342/ENSG00000108688/ENSG00000108702/ENSG00000164400/ENSG00000150630/ENSG00000181634/ENSG00000163734/ENSG00000136689/ENSG00000163737/ENSG00000104998/ENSG00000136244/ENSG00000127191/ENSG00000134259/ENSG00000015475…
GO:0007080	BP	GO:0007080	mitotic metaphase plate congression	23	0.756430211501533	2.35024814874521	0.000131095962244363	0.00208369508595242	0.001585761645388	333	tags=61%, list=12%, signal=54%	ENSG00000121621/ENSG00000138778/ENSG00000143228/ENSG00000178999/ENSG00000142945/ENSG00000118193/ENSG00000237649/ENSG00000134690/ENSG00000080986/ENSG00000134057/ENSG00000146670/ENSG00000079616/ENSG00000167513/ENSG00000134222
GO:0045841	BP	GO:0045841	negative regulation of mitotic metaphase/anaphase transition	21	0.77221820190839	2.34801513742213	0.000133386688008537	0.00208369508595242	0.001585761645388	422	tags=76%, list=15%, signal=65%	ENSG00000112742/ENSG00000117724/ENSG00000156970/ENSG00000169679/ENSG00000178999/ENSG00000080986/ENSG00000166851/ENSG00000134057/ENSG00000071539/ENSG00000122952/ENSG00000164109/ENSG00000167513/ENSG00000112029/ENSG00000174442/ENSG00000184445/ENSG00000178295
GO:1902100	BP	GO:1902100	negative regulation of metaphase/anaphase transition of cell cycle	21	0.77221820190839	2.34801513742213	0.000133386688008537	0.00208369508595242	0.001585761645388	422	tags=76%, list=15%, signal=65%	ENSG00000112742/ENSG00000117724/ENSG00000156970/ENSG00000169679/ENSG00000178999/ENSG00000080986/ENSG00000166851/ENSG00000134057/ENSG00000071539/ENSG00000122952/ENSG00000164109/ENSG00000167513/ENSG00000112029/ENSG00000174442/ENSG00000184445/ENSG00000178295
GO:0006281	BP	GO:0006281	DNA repair	158	0.558327368469622	2.34089499293491	0.000103498240529911	0.00208369508595242	0.001585761645388	770	tags=59%, list=28%, signal=45%	ENSG00000170312/ENSG00000171320/ENSG00000174371/ENSG00000093009/ENSG00000092853/ENSG00000051341/ENSG00000109674/ENSG00000136492/ENSG00000197299/ENSG00000111247/ENSG00000085999/ENSG00000164611/ENSG00000100206/ENSG00000154920/ENSG00000143476/ENSG00000071539/ENSG00000127423/ENSG00000187741/ENSG00000131153/ENSG00000146670/ENSG00000012048/ENSG00000144554/ENSG00000166803/ENSG00000196584/ENSG00000079616…
GO:0045839	BP	GO:0045839	negative regulation of mitotic nuclear division	23	0.753017011382337	2.33964324806903	0.000131095962244363	0.00208369508595242	0.001585761645388	521	tags=78%, list=19%, signal=64%	ENSG00000112742/ENSG00000117724/ENSG00000156970/ENSG00000169679/ENSG00000178999/ENSG00000080986/ENSG00000166851/ENSG00000134057/ENSG00000071539/ENSG00000122952/ENSG00000164109/ENSG00000167513/ENSG00000112029/ENSG00000174442/ENSG00000184445/ENSG00000178295/ENSG00000040275/ENSG00000172167
GO:2001251	BP	GO:2001251	negative regulation of chromosome organization	33	0.695305825360767	2.33014386280918	0.000124703828407532	0.00208369508595242	0.001585761645388	535	tags=64%, list=19%, signal=52%	ENSG00000112742/ENSG00000117724/ENSG00000156970/ENSG00000131747/ENSG00000169679/ENSG00000178999/ENSG00000080986/ENSG00000135476/ENSG00000166851/ENSG00000164611/ENSG00000134057/ENSG00000071539/ENSG00000122952/ENSG00000164109/ENSG00000167513/ENSG00000112029/ENSG00000174442/ENSG00000184445/ENSG00000178295/ENSG00000040275/ENSG00000073111
GO:0007143	BP	GO:0007143	female meiotic nuclear division	14	0.840150722330285	2.31362113104782	0.000141083521444695	0.00208369508595242	0.001585761645388	346	tags=79%, list=13%, signal=69%	ENSG00000124882/ENSG00000112742/ENSG00000131747/ENSG00000121152/ENSG00000080986/ENSG00000087586/ENSG00000157456/ENSG00000166851/ENSG00000071539/ENSG00000120539/ENSG00000112029
GO:0007094	BP	GO:0007094	mitotic spindle assembly checkpoint signaling	20	0.768720125928202	2.30938629430608	0.000134643866971859	0.00208369508595242	0.001585761645388	422	tags=75%, list=15%, signal=64%	ENSG00000112742/ENSG00000117724/ENSG00000156970/ENSG00000169679/ENSG00000178999/ENSG00000080986/ENSG00000166851/ENSG00000134057/ENSG00000071539/ENSG00000122952/ENSG00000164109/ENSG00000167513/ENSG00000174442/ENSG00000184445/ENSG00000178295
GO:0031577	BP	GO:0031577	spindle checkpoint signaling	20	0.768720125928202	2.30938629430608	0.000134643866971859	0.00208369508595242	0.001585761645388	422	tags=75%, list=15%, signal=64%	ENSG00000112742/ENSG00000117724/ENSG00000156970/ENSG00000169679/ENSG00000178999/ENSG00000080986/ENSG00000166851/ENSG00000134057/ENSG00000071539/ENSG00000122952/ENSG00000164109/ENSG00000167513/ENSG00000174442/ENSG00000184445/ENSG00000178295
GO:0071173	BP	GO:0071173	spindle assembly checkpoint signaling	20	0.768720125928202	2.30938629430608	0.000134643866971859	0.00208369508595242	0.001585761645388	422	tags=75%, list=15%, signal=64%	ENSG00000112742/ENSG00000117724/ENSG00000156970/ENSG00000169679/ENSG00000178999/ENSG00000080986/ENSG00000166851/ENSG00000134057/ENSG00000071539/ENSG00000122952/ENSG00000164109/ENSG00000167513/ENSG00000174442/ENSG00000184445/ENSG00000178295
GO:0071174	BP	GO:0071174	mitotic spindle checkpoint signaling	20	0.768720125928202	2.30938629430608	0.000134643866971859	0.00208369508595242	0.001585761645388	422	tags=75%, list=15%, signal=64%	ENSG00000112742/ENSG00000117724/ENSG00000156970/ENSG00000169679/ENSG00000178999/ENSG00000080986/ENSG00000166851/ENSG00000134057/ENSG00000071539/ENSG00000122952/ENSG00000164109/ENSG00000167513/ENSG00000174442/ENSG00000184445/ENSG00000178295
GO:0006302	BP	GO:0006302	double-strand break repair	96	0.573638856913993	2.28725265123541	0.000108061378863194	0.00208369508595242	0.001585761645388	770	tags=61%, list=28%, signal=46%	ENSG00000171320/ENSG00000093009/ENSG00000051341/ENSG00000136492/ENSG00000197299/ENSG00000111247/ENSG00000085999/ENSG00000100206/ENSG00000154920/ENSG00000071539/ENSG00000127423/ENSG00000131153/ENSG00000146670/ENSG00000012048/ENSG00000144554/ENSG00000196584/ENSG00000125885/ENSG00000147536/ENSG00000149948/ENSG00000111206/ENSG00000160957/ENSG00000100297/ENSG00000188486/ENSG00000139618/ENSG00000181544…
GO:0071824	BP	GO:0071824	protein-DNA complex subunit organization	48	0.634753381242317	2.28530326350804	0.000118427285646613	0.00208369508595242	0.001585761645388	560	tags=58%, list=20%, signal=47%	ENSG00000123485/ENSG00000138778/ENSG00000117724/ENSG00000126787/ENSG00000115163/ENSG00000093009/ENSG00000102384/ENSG00000197061/ENSG00000100206/ENSG00000105011/ENSG00000119969/ENSG00000104147/ENSG00000123219/ENSG00000167513/ENSG00000188486/ENSG00000138092/ENSG00000166451/ENSG00000184445/ENSG00000203760/ENSG00000164104/ENSG00000159055/ENSG00000051180/ENSG00000153044/ENSG00000167670/ENSG00000159259…
GO:0005871	CC	GO:0005871	kinesin complex	14	0.8284091708474	2.28128704991207	0.000141083521444695	0.00208369508595242	0.001585761645388	242	tags=79%, list=9%, signal=72%	ENSG00000121621/ENSG00000186185/ENSG00000142945/ENSG00000118193/ENSG00000237649/ENSG00000163808/ENSG00000138182/ENSG00000138160/ENSG00000137807/ENSG00000112984/ENSG00000079616
GO:0015631	MF	GO:0015631	tubulin binding	91	0.574597010423762	2.27974974201847	0.000108742931709439	0.00208369508595242	0.001585761645388	358	tags=38%, list=13%, signal=35%	ENSG00000154839/ENSG00000121621/ENSG00000138778/ENSG00000117724/ENSG00000186185/ENSG00000137804/ENSG00000126787/ENSG00000076382/ENSG00000152503/ENSG00000075218/ENSG00000142945/ENSG00000118193/ENSG00000237649/ENSG00000101447/ENSG00000090889/ENSG00000163808/ENSG00000138182/ENSG00000138160/ENSG00000137807/ENSG00000198901/ENSG00000089685/ENSG00000088325/ENSG00000112984/ENSG00000166851/ENSG00000161800…
GO:0006310	BP	GO:0006310	DNA recombination	98	0.570168123774438	2.27851472712059	0.000107805088400172	0.00208369508595242	0.001585761645388	769	tags=60%, list=28%, signal=45%	ENSG00000131747/ENSG00000168685/ENSG00000174371/ENSG00000093009/ENSG00000051341/ENSG00000136492/ENSG00000197299/ENSG00000111247/ENSG00000085999/ENSG00000100206/ENSG00000154920/ENSG00000071539/ENSG00000121211/ENSG00000127423/ENSG00000131153/ENSG00000012048/ENSG00000144554/ENSG00000196584/ENSG00000125885/ENSG00000147536/ENSG00000131470/ENSG00000160957/ENSG00000100297/ENSG00000188486/ENSG00000182481…
GO:0034508	BP	GO:0034508	centromere complex assembly	20	0.75816998655254	2.2776916027592	0.000134643866971859	0.00208369508595242	0.001585761645388	441	tags=75%, list=16%, signal=63%	ENSG00000123485/ENSG00000138778/ENSG00000117724/ENSG00000126787/ENSG00000115163/ENSG00000102384/ENSG00000119969/ENSG00000104147/ENSG00000123219/ENSG00000138092/ENSG00000166451/ENSG00000184445/ENSG00000203760/ENSG00000159055/ENSG00000153044
GO:0051302	BP	GO:0051302	regulation of cell division	48	0.631767553956689	2.27455338640339	0.000118427285646613	0.00208369508595242	0.001585761645388	475	tags=56%, list=17%, signal=47%	ENSG00000124882/ENSG00000129173/ENSG00000125538/ENSG00000066279/ENSG00000186185/ENSG00000178999/ENSG00000118193/ENSG00000073282/ENSG00000138182/ENSG00000163235/ENSG00000137807/ENSG00000198901/ENSG00000087586/ENSG00000112984/ENSG00000197299/ENSG00000142731/ENSG00000166851/ENSG00000122966/ENSG00000161800/ENSG00000094804/ENSG00000150630/ENSG00000091651/ENSG00000114346/ENSG00000139618/ENSG00000080839…
GO:0032508	BP	GO:0032508	DNA duplex unwinding	36	0.666784944646861	2.27343782895651	0.000123334977799704	0.00208369508595242	0.001585761645388	590	tags=69%, list=21%, signal=55%	ENSG00000186871/ENSG00000131747/ENSG00000093009/ENSG00000051341/ENSG00000136492/ENSG00000197299/ENSG00000085999/ENSG00000131153/ENSG00000125885/ENSG00000147536/ENSG00000133119/ENSG00000101003/ENSG00000160957/ENSG00000100297/ENSG00000127586/ENSG00000181938/ENSG00000051180/ENSG00000138346/ENSG00000049541/ENSG00000163918/ENSG00000073111/ENSG00000111445/ENSG00000104738/ENSG00000112118/ENSG00000166508
GO:1902749	BP	GO:1902749	regulation of cell cycle G2/M phase transition	36	0.666160290641693	2.2713080387494	0.000123334977799704	0.00208369508595242	0.001585761645388	539	tags=61%, list=20%, signal=50%	ENSG00000170312/ENSG00000117724/ENSG00000178999/ENSG00000118193/ENSG00000158402/ENSG00000087586/ENSG00000092853/ENSG00000197299/ENSG00000166851/ENSG00000134057/ENSG00000143476/ENSG00000012048/ENSG00000085840/ENSG00000094804/ENSG00000164045/ENSG00000149948/ENSG00000161692/ENSG00000112029/ENSG00000167325/ENSG00000123374/ENSG00000176208/ENSG00000097046
GO:0005875	CC	GO:0005875	microtubule associated complex	31	0.685544219614917	2.26718969851794	0.000125565042692115	0.00208369508595242	0.001585761645388	129	tags=45%, list=5%, signal=44%	ENSG00000121621/ENSG00000186185/ENSG00000178999/ENSG00000142945/ENSG00000118193/ENSG00000237649/ENSG00000163808/ENSG00000138182/ENSG00000134690/ENSG00000138160/ENSG00000137807/ENSG00000087586/ENSG00000089685/ENSG00000112984
GO:0010389	BP	GO:0010389	regulation of G2/M transition of mitotic cell cycle	35	0.668596873124625	2.26638140462342	0.000123716441915131	0.00208369508595242	0.001585761645388	468	tags=57%, list=17%, signal=48%	ENSG00000170312/ENSG00000117724/ENSG00000178999/ENSG00000118193/ENSG00000158402/ENSG00000087586/ENSG00000092853/ENSG00000197299/ENSG00000166851/ENSG00000134057/ENSG00000143476/ENSG00000012048/ENSG00000085840/ENSG00000094804/ENSG00000164045/ENSG00000149948/ENSG00000161692/ENSG00000112029/ENSG00000167325/ENSG00000123374
GO:1901991	BP	GO:1901991	negative regulation of mitotic cell cycle phase transition	66	0.595207265367769	2.25971368189334	0.000113211819313936	0.00208369508595242	0.001585761645388	468	tags=47%, list=17%, signal=40%	ENSG00000170312/ENSG00000112742/ENSG00000108691/ENSG00000117724/ENSG00000156970/ENSG00000169679/ENSG00000178999/ENSG00000075218/ENSG00000080986/ENSG00000092853/ENSG00000197299/ENSG00000166851/ENSG00000134057/ENSG00000143476/ENSG00000071539/ENSG00000012048/ENSG00000122952/ENSG00000164109/ENSG00000085840/ENSG00000094804/ENSG00000106462/ENSG00000149948/ENSG00000167513/ENSG00000122641/ENSG00000112029…
GO:0033260	BP	GO:0033260	nuclear DNA replication	23	0.725003691077048	2.25260514040669	0.000131095962244363	0.00208369508595242	0.001585761645388	718	tags=96%, list=26%, signal=71%	ENSG00000093009/ENSG00000197299/ENSG00000167513/ENSG00000101003/ENSG00000161692/ENSG00000006634/ENSG00000139618/ENSG00000181938/ENSG00000168496/ENSG00000051180/ENSG00000176208/ENSG00000138346/ENSG00000105486/ENSG00000073111/ENSG00000097046/ENSG00000101868/ENSG00000112312/ENSG00000104738/ENSG00000112118/ENSG00000159147/ENSG00000132646/ENSG00000075131
GO:0006275	BP	GO:0006275	regulation of DNA replication	47	0.626547664815087	2.2490284232779	0.000118581762124985	0.00208369508595242	0.001585761645388	750	tags=70%, list=27%, signal=52%	ENSG00000124882/ENSG00000129173/ENSG00000170312/ENSG00000171320/ENSG00000197299/ENSG00000145386/ENSG00000131153/ENSG00000094804/ENSG00000147536/ENSG00000133119/ENSG00000167513/ENSG00000101003/ENSG00000161692/ENSG00000127586/ENSG00000112029/ENSG00000006634/ENSG00000139618/ENSG00000181938/ENSG00000111602/ENSG00000123374/ENSG00000176208/ENSG00000138346/ENSG00000049541/ENSG00000163918/ENSG00000097046…
GO:0032465	BP	GO:0032465	regulation of cytokinesis	25	0.710219999398769	2.24898732390909	0.00012923235978289	0.00208369508595242	0.001585761645388	358	tags=60%, list=13%, signal=53%	ENSG00000129173/ENSG00000178999/ENSG00000118193/ENSG00000138182/ENSG00000137807/ENSG00000198901/ENSG00000087586/ENSG00000112984/ENSG00000142731/ENSG00000166851/ENSG00000122966/ENSG00000161800/ENSG00000094804/ENSG00000114346/ENSG00000139618
GO:0044786	BP	GO:0044786	cell cycle DNA replication	27	0.69978698372732	2.24895529846882	0.000128221566867547	0.00208369508595242	0.001585761645388	718	tags=89%, list=26%, signal=66%	ENSG00000129173/ENSG00000093009/ENSG00000197299/ENSG00000167513/ENSG00000101003/ENSG00000161692/ENSG00000112029/ENSG00000006634/ENSG00000139618/ENSG00000181938/ENSG00000168496/ENSG00000051180/ENSG00000176208/ENSG00000138346/ENSG00000105486/ENSG00000073111/ENSG00000097046/ENSG00000101868/ENSG00000112312/ENSG00000104738/ENSG00000112118/ENSG00000159147/ENSG00000132646/ENSG00000075131
GO:0070192	BP	GO:0070192	chromosome organization involved in meiotic cell cycle	23	0.722276205564246	2.24413077267293	0.000131095962244363	0.00208369508595242	0.001585761645388	623	tags=78%, list=23%, signal=61%	ENSG00000156970/ENSG00000129810/ENSG00000121152/ENSG00000169679/ENSG00000163535/ENSG00000136492/ENSG00000100206/ENSG00000071539/ENSG00000175305/ENSG00000144554/ENSG00000131470/ENSG00000113810/ENSG00000051180/ENSG00000143452/ENSG00000151503/ENSG00000136824/ENSG00000010292/ENSG00000058804
GO:0032392	BP	GO:0032392	DNA geometric change	40	0.644155098247428	2.24227525951023	0.000121624908781318	0.00208369508595242	0.001585761645388	590	tags=65%, list=21%, signal=52%	ENSG00000186871/ENSG00000131747/ENSG00000093009/ENSG00000051341/ENSG00000136492/ENSG00000197299/ENSG00000085999/ENSG00000131153/ENSG00000125885/ENSG00000147536/ENSG00000133119/ENSG00000101003/ENSG00000160957/ENSG00000100297/ENSG00000127586/ENSG00000181938/ENSG00000164104/ENSG00000051180/ENSG00000138346/ENSG00000049541/ENSG00000163918/ENSG00000073111/ENSG00000111445/ENSG00000104738/ENSG00000112118…
GO:0071222	BP	GO:0071222	cellular response to lipopolysaccharide	47	0.620483990768582	2.22726252094371	0.000118581762124985	0.00208369508595242	0.001585761645388	438	tags=51%, list=16%, signal=44%	ENSG00000169245/ENSG00000169248/ENSG00000271503/ENSG00000050730/ENSG00000138755/ENSG00000169429/ENSG00000125538/ENSG00000124875/ENSG00000108691/ENSG00000118503/ENSG00000134070/ENSG00000197646/ENSG00000134326/ENSG00000120217/ENSG00000164400/ENSG00000137462/ENSG00000100906/ENSG00000163734/ENSG00000106366/ENSG00000145901/ENSG00000164104/ENSG00000163737/ENSG00000114251/ENSG00000136244
GO:0005874	CC	GO:0005874	microtubule	103	0.553563185515749	2.22639271503139	0.000107238605898123	0.00208369508595242	0.001585761645388	333	tags=34%, list=12%, signal=31%	ENSG00000117650/ENSG00000154839/ENSG00000170312/ENSG00000121621/ENSG00000066279/ENSG00000138778/ENSG00000186185/ENSG00000137804/ENSG00000178999/ENSG00000076382/ENSG00000075218/ENSG00000142945/ENSG00000118193/ENSG00000237649/ENSG00000090889/ENSG00000163808/ENSG00000165480/ENSG00000138182/ENSG00000138160/ENSG00000137807/ENSG00000198901/ENSG00000087586/ENSG00000089685/ENSG00000088325/ENSG00000112984…
GO:0090329	BP	GO:0090329	regulation of DNA-templated DNA replication	27	0.692086208062352	2.22420676693455	0.000128221566867547	0.00208369508595242	0.001585761645388	750	tags=89%, list=27%, signal=65%	ENSG00000129173/ENSG00000197299/ENSG00000131153/ENSG00000147536/ENSG00000133119/ENSG00000167513/ENSG00000101003/ENSG00000161692/ENSG00000127586/ENSG00000112029/ENSG00000006634/ENSG00000139618/ENSG00000181938/ENSG00000111602/ENSG00000123374/ENSG00000049541/ENSG00000163918/ENSG00000097046/ENSG00000112312/ENSG00000111445/ENSG00000159147/ENSG00000132646/ENSG00000075131/ENSG00000104320
GO:0071219	BP	GO:0071219	cellular response to molecule of bacterial origin	48	0.617410334096866	2.22286307270023	0.000118427285646613	0.00208369508595242	0.001585761645388	438	tags=50%, list=16%, signal=43%	ENSG00000169245/ENSG00000169248/ENSG00000271503/ENSG00000050730/ENSG00000138755/ENSG00000169429/ENSG00000125538/ENSG00000124875/ENSG00000108691/ENSG00000118503/ENSG00000134070/ENSG00000197646/ENSG00000134326/ENSG00000120217/ENSG00000164400/ENSG00000137462/ENSG00000100906/ENSG00000163734/ENSG00000106366/ENSG00000145901/ENSG00000164104/ENSG00000163737/ENSG00000114251/ENSG00000136244
GO:0051383	BP	GO:0051383	kinetochore organization	17	0.764625354856948	2.21558656154444	0.000136930028755306	0.00208369508595242	0.001585761645388	441	tags=76%, list=16%, signal=65%	ENSG00000138778/ENSG00000117724/ENSG00000143228/ENSG00000126787/ENSG00000115163/ENSG00000080986/ENSG00000123219/ENSG00000167513/ENSG00000166451/ENSG00000184445/ENSG00000203760/ENSG00000113810/ENSG00000153044
GO:0016887	MF	GO:0016887	ATP hydrolysis activity	72	0.57620716547929	2.21406931269428	0.000112183082791115	0.00208369508595242	0.001585761645388	590	tags=50%, list=21%, signal=40%	ENSG00000121621/ENSG00000186871/ENSG00000186185/ENSG00000142945/ENSG00000118193/ENSG00000237649/ENSG00000163808/ENSG00000138182/ENSG00000137807/ENSG00000112984/ENSG00000136492/ENSG00000197299/ENSG00000085999/ENSG00000071539/ENSG00000107201/ENSG00000156802/ENSG00000085840/ENSG00000079616/ENSG00000115267/ENSG00000125885/ENSG00000160957/ENSG00000100297/ENSG00000127586/ENSG00000113810/ENSG00000070961…
GO:0045143	BP	GO:0045143	homologous chromosome segregation	18	0.75251910996158	2.21213138492522	0.000136500136500137	0.00208369508595242	0.001585761645388	301	tags=61%, list=11%, signal=55%	ENSG00000129810/ENSG00000163535/ENSG00000136492/ENSG00000135476/ENSG00000166851/ENSG00000164611/ENSG00000100206/ENSG00000071539/ENSG00000175305/ENSG00000144554/ENSG00000131470
GO:0000724	BP	GO:0000724	double-strand break repair via homologous recombination	63	0.584901086013373	2.20656975989435	0.000114025085518814	0.00208369508595242	0.001585761645388	769	tags=65%, list=28%, signal=48%	ENSG00000093009/ENSG00000051341/ENSG00000197299/ENSG00000111247/ENSG00000085999/ENSG00000100206/ENSG00000127423/ENSG00000131153/ENSG00000012048/ENSG00000196584/ENSG00000125885/ENSG00000147536/ENSG00000160957/ENSG00000100297/ENSG00000188486/ENSG00000139618/ENSG00000181544/ENSG00000168496/ENSG00000111602/ENSG00000178295/ENSG00000051180/ENSG00000164430/ENSG00000175643/ENSG00000156384/ENSG00000146263…
GO:0071216	BP	GO:0071216	cellular response to biotic stimulus	54	0.600063231229212	2.20604431931418	0.000116522955022139	0.00208369508595242	0.001585761645388	438	tags=46%, list=16%, signal=40%	ENSG00000169245/ENSG00000169248/ENSG00000271503/ENSG00000050730/ENSG00000138755/ENSG00000169429/ENSG00000125538/ENSG00000124875/ENSG00000108691/ENSG00000118503/ENSG00000134070/ENSG00000197646/ENSG00000154920/ENSG00000134326/ENSG00000120217/ENSG00000164400/ENSG00000137462/ENSG00000100906/ENSG00000163734/ENSG00000106366/ENSG00000145901/ENSG00000164104/ENSG00000163737/ENSG00000114251/ENSG00000136244
GO:0034502	BP	GO:0034502	protein localization to chromosome	36	0.647000544486192	2.20598189116191	0.000123334977799704	0.00208369508595242	0.001585761645388	620	tags=61%, list=23%, signal=48%	ENSG00000170312/ENSG00000171320/ENSG00000112742/ENSG00000137812/ENSG00000178999/ENSG00000115163/ENSG00000080986/ENSG00000166851/ENSG00000146670/ENSG00000177602/ENSG00000125885/ENSG00000106462/ENSG00000167513/ENSG00000174442/ENSG00000139618/ENSG00000184445/ENSG00000031691/ENSG00000040275/ENSG00000172167/ENSG00000099284/ENSG00000133302/ENSG00000141499
GO:0000725	BP	GO:0000725	recombinational repair	65	0.582309110090972	2.20434514414365	0.000113597637169147	0.00208369508595242	0.001585761645388	769	tags=65%, list=28%, signal=48%	ENSG00000093009/ENSG00000051341/ENSG00000197299/ENSG00000111247/ENSG00000085999/ENSG00000100206/ENSG00000127423/ENSG00000131153/ENSG00000012048/ENSG00000196584/ENSG00000125885/ENSG00000147536/ENSG00000160957/ENSG00000100297/ENSG00000188486/ENSG00000139618/ENSG00000181544/ENSG00000168496/ENSG00000111602/ENSG00000178295/ENSG00000051180/ENSG00000164430/ENSG00000175643/ENSG00000156384/ENSG00000146263…
GO:0000079	BP	GO:0000079	regulation of cyclin-dependent protein serine/threonine kinase activity	29	0.675031836000136	2.20198946976014	0.000126968004062976	0.00208369508595242	0.001585761645388	433	tags=66%, list=16%, signal=56%	ENSG00000118503/ENSG00000158402/ENSG00000100526/ENSG00000197299/ENSG00000157456/ENSG00000166851/ENSG00000127564/ENSG00000134057/ENSG00000145386/ENSG00000175305/ENSG00000162063/ENSG00000138646/ENSG00000094804/ENSG00000164045/ENSG00000123975/ENSG00000134222/ENSG00000123080/ENSG00000129355/ENSG00000173207
GO:1904029	BP	GO:1904029	regulation of cyclin-dependent protein kinase activity	29	0.675031836000136	2.20198946976014	0.000126968004062976	0.00208369508595242	0.001585761645388	433	tags=66%, list=16%, signal=56%	ENSG00000118503/ENSG00000158402/ENSG00000100526/ENSG00000197299/ENSG00000157456/ENSG00000166851/ENSG00000127564/ENSG00000134057/ENSG00000145386/ENSG00000175305/ENSG00000162063/ENSG00000138646/ENSG00000094804/ENSG00000164045/ENSG00000123975/ENSG00000134222/ENSG00000123080/ENSG00000129355/ENSG00000173207
GO:0071103	BP	GO:0071103	DNA conformation change	42	0.627111304908983	2.20164337307126	0.000121153380179307	0.00208369508595242	0.001585761645388	590	tags=62%, list=21%, signal=49%	ENSG00000186871/ENSG00000131747/ENSG00000093009/ENSG00000051341/ENSG00000136492/ENSG00000197299/ENSG00000085999/ENSG00000131153/ENSG00000125885/ENSG00000147536/ENSG00000133119/ENSG00000101003/ENSG00000160957/ENSG00000100297/ENSG00000127586/ENSG00000181938/ENSG00000164104/ENSG00000051180/ENSG00000138346/ENSG00000049541/ENSG00000163918/ENSG00000073111/ENSG00000111445/ENSG00000104738/ENSG00000112118…
GO:0045930	BP	GO:0045930	negative regulation of mitotic cell cycle	76	0.566374717590335	2.19372631337374	0.000111185234600845	0.00208369508595242	0.001585761645388	521	tags=47%, list=19%, signal=39%	ENSG00000170312/ENSG00000112742/ENSG00000108691/ENSG00000117724/ENSG00000156970/ENSG00000169679/ENSG00000178999/ENSG00000075218/ENSG00000080986/ENSG00000092853/ENSG00000197299/ENSG00000166851/ENSG00000134057/ENSG00000154920/ENSG00000143476/ENSG00000071539/ENSG00000012048/ENSG00000122952/ENSG00000144554/ENSG00000164109/ENSG00000085840/ENSG00000094804/ENSG00000106462/ENSG00000149948/ENSG00000167513…
GO:0051656	BP	GO:0051656	establishment of organelle localization	82	0.558577796174396	2.18716379243825	0.000110071546505228	0.00208369508595242	0.001585761645388	333	tags=32%, list=12%, signal=29%	ENSG00000121621/ENSG00000138778/ENSG00000117724/ENSG00000143228/ENSG00000137804/ENSG00000178999/ENSG00000126787/ENSG00000076382/ENSG00000115163/ENSG00000142945/ENSG00000118193/ENSG00000237649/ENSG00000101447/ENSG00000134690/ENSG00000080986/ENSG00000186193/ENSG00000135476/ENSG00000166851/ENSG00000134057/ENSG00000146670/ENSG00000065320/ENSG00000164109/ENSG00000079616/ENSG00000167513/ENSG00000149503…
GO:0000228	CC	GO:0000228	nuclear chromosome	75	0.562540422421296	2.17545749080048	0.000111383381599465	0.00208369508595242	0.001585761645388	974	tags=79%, list=35%, signal=52%	ENSG00000117650/ENSG00000131747/ENSG00000065328/ENSG00000093009/ENSG00000089685/ENSG00000197299/ENSG00000166851/ENSG00000197061/ENSG00000100206/ENSG00000131153/ENSG00000012048/ENSG00000085840/ENSG00000091651/ENSG00000147536/ENSG00000198056/ENSG00000131470/ENSG00000149948/ENSG00000101003/ENSG00000100297/ENSG00000149503/ENSG00000188486/ENSG00000139618/ENSG00000014138/ENSG00000101945/ENSG00000181938…
GO:0045069	BP	GO:0045069	regulation of viral genome replication	24	0.693205480424098	2.17500325048556	0.000130039011703511	0.00208369508595242	0.001585761645388	478	tags=62%, list=17%, signal=52%	ENSG00000271503/ENSG00000169429/ENSG00000179750/ENSG00000131747/ENSG00000111331/ENSG00000135114/ENSG00000115267/ENSG00000149948/ENSG00000157601/ENSG00000134321/ENSG00000145901/ENSG00000166801/ENSG00000172183/ENSG00000185745/ENSG00000111335
GO:0042379	MF	GO:0042379	chemokine receptor binding	16	0.762285470791044	2.17133421067796	0.000138850319355735	0.00208369508595242	0.001585761645388	205	tags=56%, list=7%, signal=52%	ENSG00000169245/ENSG00000169248/ENSG00000271503/ENSG00000138755/ENSG00000169429/ENSG00000124875/ENSG00000108691/ENSG00000108688/ENSG00000108702
GO:0005125	MF	GO:0005125	cytokine activity	50	0.596299988167595	2.16253267672705	0.000117647058823529	0.00208369508595242	0.001585761645388	695	tags=68%, list=25%, signal=52%	ENSG00000169245/ENSG00000169248/ENSG00000271503/ENSG00000138755/ENSG00000169429/ENSG00000125538/ENSG00000124875/ENSG00000108691/ENSG00000008517/ENSG00000145777/ENSG00000128342/ENSG00000108688/ENSG00000108702/ENSG00000164400/ENSG00000181634/ENSG00000163734/ENSG00000122641/ENSG00000136689/ENSG00000125845/ENSG00000163737/ENSG00000114251/ENSG00000136244/ENSG00000164136/ENSG00000115009/ENSG00000102265…
GO:0008009	MF	GO:0008009	chemokine activity	15	0.77167506707481	2.16148213163839	0.000140193466984439	0.00208369508595242	0.001585761645388	205	tags=60%, list=7%, signal=56%	ENSG00000169245/ENSG00000169248/ENSG00000271503/ENSG00000138755/ENSG00000169429/ENSG00000124875/ENSG00000108691/ENSG00000108688/ENSG00000108702
GO:0007018	BP	GO:0007018	microtubule-based movement	41	0.618207804251308	2.15901208091339	0.00012132977432662	0.00208369508595242	0.001585761645388	242	tags=37%, list=9%, signal=34%	ENSG00000121621/ENSG00000138778/ENSG00000186185/ENSG00000126787/ENSG00000142945/ENSG00000118193/ENSG00000237649/ENSG00000090889/ENSG00000163808/ENSG00000138182/ENSG00000138160/ENSG00000137807/ENSG00000112984/ENSG00000186638/ENSG00000079616
GO:0006270	BP	GO:0006270	DNA replication initiation	24	0.687257159980459	2.15633978537284	0.000130039011703511	0.00208369508595242	0.001585761645388	590	tags=75%, list=21%, signal=59%	ENSG00000065328/ENSG00000093009/ENSG00000175305/ENSG00000085840/ENSG00000094804/ENSG00000091651/ENSG00000198056/ENSG00000167513/ENSG00000100297/ENSG00000014138/ENSG00000181938/ENSG00000123374/ENSG00000073111/ENSG00000101868/ENSG00000112312/ENSG00000104738/ENSG00000112118/ENSG00000166508
GO:0007062	BP	GO:0007062	sister chromatid cohesion	26	0.67500717719953	2.15439001995495	0.000128584287000129	0.00208369508595242	0.001585761645388	242	tags=42%, list=9%, signal=39%	ENSG00000171320/ENSG00000156970/ENSG00000129810/ENSG00000169679/ENSG00000117399/ENSG00000163535/ENSG00000135476/ENSG00000166851/ENSG00000146670/ENSG00000177602/ENSG00000079616
GO:0032886	BP	GO:0032886	regulation of microtubule-based process	51	0.589810752354857	2.1475134667383	0.000117247039512252	0.00208369508595242	0.001585761645388	450	tags=45%, list=16%, signal=38%	ENSG00000154839/ENSG00000121621/ENSG00000076382/ENSG00000152503/ENSG00000163808/ENSG00000165480/ENSG00000087586/ENSG00000088325/ENSG00000075702/ENSG00000142731/ENSG00000166851/ENSG00000013810/ENSG00000136108/ENSG00000012048/ENSG00000162063/ENSG00000117632/ENSG00000136122/ENSG00000123473/ENSG00000134222/ENSG00000178295/ENSG00000156876/ENSG00000213024/ENSG00000151849
GO:0031570	BP	GO:0031570	DNA integrity checkpoint signaling	44	0.604510226095322	2.14485074471182	0.000119961612284069	0.00208369508595242	0.001585761645388	504	tags=48%, list=18%, signal=40%	ENSG00000170312/ENSG00000075218/ENSG00000093009/ENSG00000092853/ENSG00000136492/ENSG00000197299/ENSG00000166851/ENSG00000154920/ENSG00000143476/ENSG00000012048/ENSG00000144554/ENSG00000085840/ENSG00000094804/ENSG00000092470/ENSG00000101412/ENSG00000149948/ENSG00000167513/ENSG00000188486/ENSG00000111602/ENSG00000123374/ENSG00000138346
GO:0032496	BP	GO:0032496	response to lipopolysaccharide	63	0.568455951385316	2.14452963441776	0.000114025085518814	0.00208369508595242	0.001585761645388	667	tags=60%, list=24%, signal=47%	ENSG00000169245/ENSG00000169248/ENSG00000271503/ENSG00000050730/ENSG00000138755/ENSG00000169429/ENSG00000163347/ENSG00000125538/ENSG00000124875/ENSG00000108691/ENSG00000118503/ENSG00000134070/ENSG00000197646/ENSG00000131203/ENSG00000134326/ENSG00000120217/ENSG00000164400/ENSG00000100739/ENSG00000137462/ENSG00000100906/ENSG00000163734/ENSG00000106366/ENSG00000125384/ENSG00000145901/ENSG00000164104…
GO:0002237	BP	GO:0002237	response to molecule of bacterial origin	64	0.565846605209566	2.13811918344286	0.000113817436831323	0.00208369508595242	0.001585761645388	667	tags=59%, list=24%, signal=46%	ENSG00000169245/ENSG00000169248/ENSG00000271503/ENSG00000050730/ENSG00000138755/ENSG00000169429/ENSG00000163347/ENSG00000125538/ENSG00000124875/ENSG00000108691/ENSG00000118503/ENSG00000134070/ENSG00000197646/ENSG00000131203/ENSG00000134326/ENSG00000120217/ENSG00000164400/ENSG00000100739/ENSG00000137462/ENSG00000100906/ENSG00000163734/ENSG00000106366/ENSG00000125384/ENSG00000145901/ENSG00000164104…
GO:0071621	BP	GO:0071621	granulocyte chemotaxis	26	0.666472129103574	2.12714909117839	0.000128584287000129	0.00208369508595242	0.001585761645388	695	tags=77%, list=25%, signal=58%	ENSG00000169245/ENSG00000169248/ENSG00000271503/ENSG00000138755/ENSG00000169429/ENSG00000125538/ENSG00000124875/ENSG00000108691/ENSG00000108688/ENSG00000108702/ENSG00000163734/ENSG00000163737/ENSG00000123610/ENSG00000115009/ENSG00000171608/ENSG00000145147/ENSG00000157368/ENSG00000081041/ENSG00000110944/ENSG00000006210
GO:0030593	BP	GO:0030593	neutrophil chemotaxis	24	0.676425028022	2.12235286102694	0.000130039011703511	0.00208369508595242	0.001585761645388	695	tags=79%, list=25%, signal=60%	ENSG00000169245/ENSG00000169248/ENSG00000271503/ENSG00000138755/ENSG00000169429/ENSG00000125538/ENSG00000124875/ENSG00000108691/ENSG00000108688/ENSG00000108702/ENSG00000163734/ENSG00000163737/ENSG00000123610/ENSG00000115009/ENSG00000171608/ENSG00000145147/ENSG00000081041/ENSG00000110944/ENSG00000006210
GO:0003678	MF	GO:0003678	DNA helicase activity	28	0.655147424193137	2.12057646756768	0.000127713920817369	0.00208369508595242	0.001585761645388	590	tags=68%, list=21%, signal=54%	ENSG00000186871/ENSG00000051341/ENSG00000136492/ENSG00000197299/ENSG00000085999/ENSG00000125885/ENSG00000133119/ENSG00000160957/ENSG00000100297/ENSG00000127586/ENSG00000051180/ENSG00000138346/ENSG00000049541/ENSG00000163918/ENSG00000073111/ENSG00000111445/ENSG00000104738/ENSG00000112118/ENSG00000166508
GO:0005813	CC	GO:0005813	centrosome	157	0.506016929007225	2.12017590627097	0.000103616205574552	0.00208369508595242	0.001585761645388	656	tags=43%, list=24%, signal=35%	ENSG00000169607/ENSG00000117650/ENSG00000170312/ENSG00000066279/ENSG00000117724/ENSG00000072571/ENSG00000129810/ENSG00000178999/ENSG00000126787/ENSG00000076382/ENSG00000117399/ENSG00000142945/ENSG00000138180/ENSG00000163808/ENSG00000165480/ENSG00000138182/ENSG00000080986/ENSG00000137807/ENSG00000093009/ENSG00000087586/ENSG00000075702/ENSG00000142731/ENSG00000135476/ENSG00000157456/ENSG00000166851…
GO:0071459	BP	GO:0071459	protein localization to chromosome, centromeric region	19	0.71012684564197	2.11229390826689	0.000135281385281385	0.00208369508595242	0.001585761645388	521	tags=68%, list=19%, signal=56%	ENSG00000170312/ENSG00000112742/ENSG00000137812/ENSG00000178999/ENSG00000115163/ENSG00000080986/ENSG00000177602/ENSG00000167513/ENSG00000174442/ENSG00000184445/ENSG00000031691/ENSG00000040275/ENSG00000172167
GO:0005657	CC	GO:0005657	replication fork	32	0.633716832963178	2.10986792903984	0.000125219133483596	0.00208369508595242	0.001585761645388	959	tags=94%, list=35%, signal=62%	ENSG00000065328/ENSG00000197299/ENSG00000196584/ENSG00000198056/ENSG00000133119/ENSG00000276043/ENSG00000188486/ENSG00000014138/ENSG00000111602/ENSG00000146263/ENSG00000049541/ENSG00000163918/ENSG00000101868/ENSG00000111445/ENSG00000062822/ENSG00000112118/ENSG00000130816/ENSG00000159147/ENSG00000070950/ENSG00000132646/ENSG00000140451/ENSG00000075131/ENSG00000198554/ENSG00000104320/ENSG00000106399…
GO:0007131	BP	GO:0007131	reciprocal meiotic recombination	18	0.717620764222702	2.10954299232628	0.000136500136500137	0.00208369508595242	0.001585761645388	301	tags=56%, list=11%, signal=50%	ENSG00000131747/ENSG00000136492/ENSG00000111247/ENSG00000085999/ENSG00000100206/ENSG00000154920/ENSG00000071539/ENSG00000121211/ENSG00000144554/ENSG00000131470
GO:0140527	BP	GO:0140527	reciprocal homologous recombination	18	0.717620764222702	2.10954299232628	0.000136500136500137	0.00208369508595242	0.001585761645388	301	tags=56%, list=11%, signal=50%	ENSG00000131747/ENSG00000136492/ENSG00000111247/ENSG00000085999/ENSG00000100206/ENSG00000154920/ENSG00000071539/ENSG00000121211/ENSG00000144554/ENSG00000131470
GO:1990266	BP	GO:1990266	neutrophil migration	27	0.656395170049274	2.10950393462431	0.000128221566867547	0.00208369508595242	0.001585761645388	406	tags=52%, list=15%, signal=45%	ENSG00000169245/ENSG00000169248/ENSG00000271503/ENSG00000138755/ENSG00000169429/ENSG00000125538/ENSG00000124875/ENSG00000108691/ENSG00000158714/ENSG00000108688/ENSG00000108702/ENSG00000163734/ENSG00000163737/ENSG00000123610
GO:0044815	CC	GO:0044815	DNA packaging complex	30	0.641300998028878	2.10579471533975	0.000126422250316056	0.00208369508595242	0.001585761645388	608	tags=63%, list=22%, signal=50%	ENSG00000109805/ENSG00000143228/ENSG00000121152/ENSG00000152253/ENSG00000115163/ENSG00000080986/ENSG00000163535/ENSG00000197061/ENSG00000161888/ENSG00000146918/ENSG00000188486/ENSG00000110987/ENSG00000113810/ENSG00000099284/ENSG00000164032/ENSG00000151503/ENSG00000136824/ENSG00000133302/ENSG00000010292
GO:0097530	BP	GO:0097530	granulocyte migration	29	0.645198654168535	2.10467205635949	0.000126968004062976	0.00208369508595242	0.001585761645388	695	tags=72%, list=25%, signal=55%	ENSG00000169245/ENSG00000169248/ENSG00000271503/ENSG00000138755/ENSG00000169429/ENSG00000125538/ENSG00000124875/ENSG00000108691/ENSG00000158714/ENSG00000108688/ENSG00000108702/ENSG00000163734/ENSG00000163737/ENSG00000123610/ENSG00000115009/ENSG00000171608/ENSG00000145147/ENSG00000157368/ENSG00000081041/ENSG00000110944/ENSG00000006210
GO:0007292	BP	GO:0007292	female gamete generation	34	0.624217419859966	2.10410169286335	0.000124409056979348	0.00208369508595242	0.001585761645388	510	tags=59%, list=19%, signal=49%	ENSG00000124882/ENSG00000066279/ENSG00000112742/ENSG00000131747/ENSG00000121152/ENSG00000080986/ENSG00000087586/ENSG00000157456/ENSG00000166851/ENSG00000100206/ENSG00000071539/ENSG00000125885/ENSG00000120539/ENSG00000122641/ENSG00000112029/ENSG00000139618/ENSG00000123610/ENSG00000143452/ENSG00000175592/ENSG00000125319
GO:0035825	BP	GO:0035825	homologous recombination	19	0.707132926120718	2.10338840355968	0.000135281385281385	0.00208369508595242	0.001585761645388	301	tags=53%, list=11%, signal=47%	ENSG00000131747/ENSG00000136492/ENSG00000111247/ENSG00000085999/ENSG00000100206/ENSG00000154920/ENSG00000071539/ENSG00000121211/ENSG00000144554/ENSG00000131470
GO:0045071	BP	GO:0045071	negative regulation of viral genome replication	20	0.697502505383748	2.09543456954818	0.000134643866971859	0.00208369508595242	0.001585761645388	478	tags=65%, list=17%, signal=54%	ENSG00000271503/ENSG00000179750/ENSG00000111331/ENSG00000135114/ENSG00000115267/ENSG00000149948/ENSG00000157601/ENSG00000134321/ENSG00000145901/ENSG00000166801/ENSG00000172183/ENSG00000185745/ENSG00000111335
GO:0140097	MF	GO:0140097	catalytic activity, acting on DNA	72	0.545265516945395	2.09517638909434	0.000112183082791115	0.00208369508595242	0.001585761645388	728	tags=58%, list=26%, signal=44%	ENSG00000186871/ENSG00000131747/ENSG00000174371/ENSG00000051341/ENSG00000109674/ENSG00000136492/ENSG00000197299/ENSG00000085999/ENSG00000100206/ENSG00000196584/ENSG00000125885/ENSG00000133119/ENSG00000149948/ENSG00000160957/ENSG00000100297/ENSG00000127586/ENSG00000138658/ENSG00000168496/ENSG00000100479/ENSG00000178295/ENSG00000051180/ENSG00000172183/ENSG00000176208/ENSG00000138346/ENSG00000049541…
GO:0140694	BP	GO:0140694	non-membrane-bounded organelle assembly	105	0.519641657639026	2.09349398969277	0.000107100781835707	0.00208369508595242	0.001585761645388	468	tags=38%, list=17%, signal=33%	ENSG00000117650/ENSG00000066279/ENSG00000138778/ENSG00000117724/ENSG00000178999/ENSG00000126787/ENSG00000076382/ENSG00000115163/ENSG00000011426/ENSG00000117399/ENSG00000237649/ENSG00000090889/ENSG00000163808/ENSG00000138160/ENSG00000080986/ENSG00000137807/ENSG00000101057/ENSG00000198901/ENSG00000087586/ENSG00000088325/ENSG00000075702/ENSG00000142731/ENSG00000157456/ENSG00000166851/ENSG00000161800…
GO:0008094	MF	GO:0008094	ATP-dependent activity, acting on DNA	38	0.607349058679635	2.09268441639336	0.000122729504172803	0.00208369508595242	0.001585761645388	590	tags=61%, list=21%, signal=48%	ENSG00000186871/ENSG00000131747/ENSG00000051341/ENSG00000136492/ENSG00000197299/ENSG00000085999/ENSG00000100206/ENSG00000196584/ENSG00000125885/ENSG00000133119/ENSG00000160957/ENSG00000100297/ENSG00000127586/ENSG00000051180/ENSG00000176208/ENSG00000138346/ENSG00000049541/ENSG00000163918/ENSG00000073111/ENSG00000111445/ENSG00000104738/ENSG00000112118/ENSG00000166508
GO:0019221	BP	GO:0019221	cytokine-mediated signaling pathway	96	0.524473268556611	2.09121620606686	0.000108061378863194	0.00208369508595242	0.001585761645388	619	tags=50%, list=22%, signal=40%	ENSG00000169245/ENSG00000169248/ENSG00000023445/ENSG00000271503/ENSG00000124882/ENSG00000138755/ENSG00000169429/ENSG00000125538/ENSG00000124875/ENSG00000108691/ENSG00000118503/ENSG00000168685/ENSG00000145777/ENSG00000113494/ENSG00000111331/ENSG00000134070/ENSG00000135114/ENSG00000056558/ENSG00000108688/ENSG00000108702/ENSG00000164400/ENSG00000100906/ENSG00000157601/ENSG00000163734/ENSG00000134470…
GO:0004386	MF	GO:0004386	helicase activity	45	0.586683047158307	2.09120929240935	0.000119246362985929	0.00208369508595242	0.001585761645388	790	tags=67%, list=29%, signal=48%	ENSG00000186871/ENSG00000051341/ENSG00000136492/ENSG00000197299/ENSG00000085999/ENSG00000119969/ENSG00000107201/ENSG00000115267/ENSG00000125885/ENSG00000133119/ENSG00000160957/ENSG00000100297/ENSG00000127586/ENSG00000138658/ENSG00000130589/ENSG00000051180/ENSG00000138346/ENSG00000049541/ENSG00000163918/ENSG00000073111/ENSG00000111445/ENSG00000104738/ENSG00000112118/ENSG00000166508/ENSG00000137628…
GO:0051052	BP	GO:0051052	regulation of DNA metabolic process	127	0.506836133155769	2.08518279495917	0.00010501995379122	0.00208369508595242	0.001585761645388	760	tags=53%, list=28%, signal=40%	ENSG00000124882/ENSG00000129173/ENSG00000117650/ENSG00000170312/ENSG00000171320/ENSG00000178999/ENSG00000168685/ENSG00000051341/ENSG00000197299/ENSG00000111247/ENSG00000145386/ENSG00000127423/ENSG00000131153/ENSG00000012048/ENSG00000094804/ENSG00000147536/ENSG00000133119/ENSG00000149948/ENSG00000167513/ENSG00000101003/ENSG00000111206/ENSG00000161692/ENSG00000127586/ENSG00000188486/ENSG00000112029…
GO:0005815	CC	GO:0005815	microtubule organizing center	192	0.489371165127728	2.08091045225732	0.000102543068088597	0.00208369508595242	0.001585761645388	610	tags=39%, list=22%, signal=33%	ENSG00000169607/ENSG00000117650/ENSG00000170312/ENSG00000121621/ENSG00000066279/ENSG00000117724/ENSG00000156970/ENSG00000072571/ENSG00000129810/ENSG00000131747/ENSG00000178999/ENSG00000126787/ENSG00000076382/ENSG00000117399/ENSG00000142945/ENSG00000237649/ENSG00000138180/ENSG00000163808/ENSG00000165480/ENSG00000138182/ENSG00000080986/ENSG00000137807/ENSG00000093009/ENSG00000087586/ENSG00000075702…
GO:0006959	BP	GO:0006959	humoral immune response	23	0.669475453525556	2.08007747622281	0.000131095962244363	0.00208369508595242	0.001585761645388	438	tags=57%, list=16%, signal=48%	ENSG00000169245/ENSG00000169248/ENSG00000138755/ENSG00000169429/ENSG00000125538/ENSG00000124875/ENSG00000108691/ENSG00000174371/ENSG00000112149/ENSG00000028277/ENSG00000163734/ENSG00000163737/ENSG00000136244
GO:0019079	BP	GO:0019079	viral genome replication	32	0.624333340451896	2.07862695691769	0.000125219133483596	0.00208369508595242	0.001585761645388	478	tags=50%, list=17%, signal=42%	ENSG00000271503/ENSG00000169429/ENSG00000108691/ENSG00000179750/ENSG00000131747/ENSG00000111331/ENSG00000135114/ENSG00000115267/ENSG00000149948/ENSG00000157601/ENSG00000134321/ENSG00000145901/ENSG00000166801/ENSG00000172183/ENSG00000185745/ENSG00000111335
GO:0034501	BP	GO:0034501	protein localization to kinetochore	16	0.729597378356606	2.07822372109846	0.000138850319355735	0.00208369508595242	0.001585761645388	521	tags=75%, list=19%, signal=61%	ENSG00000170312/ENSG00000112742/ENSG00000137812/ENSG00000178999/ENSG00000080986/ENSG00000177602/ENSG00000167513/ENSG00000174442/ENSG00000184445/ENSG00000031691/ENSG00000040275/ENSG00000172167
GO:1903083	BP	GO:1903083	protein localization to condensed chromosome	16	0.729597378356606	2.07822372109846	0.000138850319355735	0.00208369508595242	0.001585761645388	521	tags=75%, list=19%, signal=61%	ENSG00000170312/ENSG00000112742/ENSG00000137812/ENSG00000178999/ENSG00000080986/ENSG00000177602/ENSG00000167513/ENSG00000174442/ENSG00000184445/ENSG00000031691/ENSG00000040275/ENSG00000172167
GO:0030261	BP	GO:0030261	chromosome condensation	15	0.740859249378882	2.07516621686605	0.000140193466984439	0.00208369508595242	0.001585761645388	608	tags=87%, list=22%, signal=68%	ENSG00000170312/ENSG00000109805/ENSG00000131747/ENSG00000121152/ENSG00000137804/ENSG00000166851/ENSG00000146670/ENSG00000146918/ENSG00000149948/ENSG00000113810/ENSG00000151503/ENSG00000136824/ENSG00000010292
GO:0097431	CC	GO:0097431	mitotic spindle pole	14	0.750669972282299	2.06720754283021	0.000141083521444695	0.00208369508595242	0.001585761645388	152	tags=50%, list=6%, signal=47%	ENSG00000066279/ENSG00000178999/ENSG00000076382/ENSG00000101447/ENSG00000138182/ENSG00000087586/ENSG00000166851
GO:0006268	BP	GO:0006268	DNA unwinding involved in DNA replication	15	0.732078324584678	2.05057061587834	0.000140193466984439	0.00208369508595242	0.001585761645388	590	tags=87%, list=21%, signal=68%	ENSG00000093009/ENSG00000197299/ENSG00000131153/ENSG00000147536/ENSG00000101003/ENSG00000160957/ENSG00000100297/ENSG00000181938/ENSG00000051180/ENSG00000073111/ENSG00000104738/ENSG00000112118/ENSG00000166508
GO:0007276	BP	GO:0007276	gamete generation	96	0.513570255586194	2.04774295626436	0.000108061378863194	0.00208369508595242	0.001585761645388	420	tags=39%, list=15%, signal=34%	ENSG00000023445/ENSG00000124882/ENSG00000121621/ENSG00000066279/ENSG00000112742/ENSG00000131747/ENSG00000121152/ENSG00000122574/ENSG00000137812/ENSG00000073282/ENSG00000158402/ENSG00000080986/ENSG00000185697/ENSG00000087586/ENSG00000136492/ENSG00000157456/ENSG00000166851/ENSG00000164611/ENSG00000100206/ENSG00000105011/ENSG00000071539/ENSG00000187741/ENSG00000161800/ENSG00000144554/ENSG00000134363…
GO:0051640	BP	GO:0051640	organelle localization	102	0.509296720465822	2.0453843556886	0.000107480653482373	0.00208369508595242	0.001585761645388	333	tags=26%, list=12%, signal=24%	ENSG00000121621/ENSG00000066279/ENSG00000138778/ENSG00000117724/ENSG00000143228/ENSG00000137804/ENSG00000178999/ENSG00000126787/ENSG00000076382/ENSG00000115163/ENSG00000142945/ENSG00000118193/ENSG00000237649/ENSG00000101447/ENSG00000134690/ENSG00000080986/ENSG00000186193/ENSG00000135476/ENSG00000166851/ENSG00000134057/ENSG00000146670/ENSG00000065320/ENSG00000164109/ENSG00000079616/ENSG00000167513…
GO:0009617	BP	GO:0009617	response to bacterium	108	0.505121742502748	2.04182500225918	0.000106791969243913	0.00208369508595242	0.001585761645388	699	tags=52%, list=25%, signal=40%	ENSG00000169245/ENSG00000169248/ENSG00000271503/ENSG00000050730/ENSG00000138755/ENSG00000169429/ENSG00000163347/ENSG00000125538/ENSG00000124875/ENSG00000108691/ENSG00000118503/ENSG00000154451/ENSG00000158714/ENSG00000168685/ENSG00000162654/ENSG00000113494/ENSG00000111331/ENSG00000134070/ENSG00000197646/ENSG00000131203/ENSG00000134326/ENSG00000120217/ENSG00000137965/ENSG00000164400/ENSG00000138642…
GO:0072678	BP	GO:0072678	T cell migration	16	0.716768149138001	2.0416802667544	0.000138850319355735	0.00208369508595242	0.001585761645388	543	tags=62%, list=20%, signal=50%	ENSG00000169245/ENSG00000169248/ENSG00000271503/ENSG00000108691/ENSG00000090339/ENSG00000091972/ENSG00000114251/ENSG00000104998/ENSG00000115009/ENSG00000171608
GO:0051445	BP	GO:0051445	regulation of meiotic cell cycle	19	0.686207292156392	2.04114446866167	0.000135281385281385	0.00208369508595242	0.001585761645388	498	tags=68%, list=18%, signal=56%	ENSG00000066279/ENSG00000112742/ENSG00000117399/ENSG00000158402/ENSG00000156509/ENSG00000111247/ENSG00000071539/ENSG00000128342/ENSG00000164045/ENSG00000112029/ENSG00000114251/ENSG00000143452/ENSG00000181773
GO:0017116	MF	GO:0017116	single-stranded DNA helicase activity	17	0.704102199736356	2.04021402348292	0.000136930028755306	0.00208369508595242	0.001585761645388	590	tags=82%, list=21%, signal=65%	ENSG00000051341/ENSG00000125885/ENSG00000133119/ENSG00000100297/ENSG00000127586/ENSG00000051180/ENSG00000138346/ENSG00000049541/ENSG00000163918/ENSG00000073111/ENSG00000111445/ENSG00000104738/ENSG00000112118/ENSG00000166508
GO:0007098	BP	GO:0007098	centrosome cycle	46	0.570047405153457	2.0392276624317	0.00011900511722004	0.00208369508595242	0.001585761645388	468	tags=43%, list=17%, signal=37%	ENSG00000117650/ENSG00000170312/ENSG00000129810/ENSG00000138160/ENSG00000080986/ENSG00000087586/ENSG00000075702/ENSG00000142731/ENSG00000166851/ENSG00000012048/ENSG00000166803/ENSG00000196584/ENSG00000162063/ENSG00000123473/ENSG00000139618/ENSG00000178295/ENSG00000156876/ENSG00000213024/ENSG00000151849/ENSG00000123374
GO:0071345	BP	GO:0071345	cellular response to cytokine stimulus	172	0.483083922609386	2.0364586623076	0.000103114044132811	0.00208369508595242	0.001585761645388	676	tags=47%, list=25%, signal=38%	ENSG00000169245/ENSG00000169248/ENSG00000023445/ENSG00000271503/ENSG00000124882/ENSG00000138755/ENSG00000169429/ENSG00000163347/ENSG00000125538/ENSG00000124875/ENSG00000108691/ENSG00000118503/ENSG00000154451/ENSG00000168685/ENSG00000101057/ENSG00000162654/ENSG00000145777/ENSG00000113494/ENSG00000111331/ENSG00000134070/ENSG00000135114/ENSG00000170961/ENSG00000119969/ENSG00000056558/ENSG00000108688…
GO:0098586	BP	GO:0098586	cellular response to virus	23	0.653954716796825	2.0318541474752	0.000131095962244363	0.00208369508595242	0.001585761645388	675	tags=61%, list=25%, signal=46%	ENSG00000169245/ENSG00000023445/ENSG00000271503/ENSG00000111331/ENSG00000135114/ENSG00000107201/ENSG00000115267/ENSG00000028277/ENSG00000136244/ENSG00000110330/ENSG00000185507/ENSG00000109320/ENSG00000137628/ENSG00000089127
GO:0051653	BP	GO:0051653	spindle localization	17	0.699680499666013	2.02740165832552	0.000136930028755306	0.00208369508595242	0.001585761645388	232	tags=47%, list=8%, signal=43%	ENSG00000066279/ENSG00000137804/ENSG00000115163/ENSG00000080986/ENSG00000186193/ENSG00000135476/ENSG00000166851/ENSG00000164109
GO:0031023	BP	GO:0031023	microtubule organizing center organization	47	0.564004562932787	2.02452640737019	0.000118581762124985	0.00208369508595242	0.001585761645388	468	tags=43%, list=17%, signal=36%	ENSG00000117650/ENSG00000170312/ENSG00000129810/ENSG00000138160/ENSG00000080986/ENSG00000087586/ENSG00000075702/ENSG00000142731/ENSG00000166851/ENSG00000012048/ENSG00000166803/ENSG00000196584/ENSG00000162063/ENSG00000123473/ENSG00000139618/ENSG00000178295/ENSG00000156876/ENSG00000213024/ENSG00000151849/ENSG00000123374
GO:0006334	BP	GO:0006334	nucleosome assembly	17	0.69831179151267	2.02343567502146	0.000136930028755306	0.00208369508595242	0.001585761645388	605	tags=76%, list=22%, signal=60%	ENSG00000123485/ENSG00000197061/ENSG00000105011/ENSG00000104147/ENSG00000188486/ENSG00000203760/ENSG00000164104/ENSG00000159055/ENSG00000167670/ENSG00000159259/ENSG00000073111/ENSG00000099284/ENSG00000132780
GO:0010972	BP	GO:0010972	negative regulation of G2/M transition of mitotic cell cycle	23	0.650451020679619	2.02096807340251	0.000131095962244363	0.00208369508595242	0.001585761645388	304	tags=43%, list=11%, signal=39%	ENSG00000170312/ENSG00000178999/ENSG00000092853/ENSG00000197299/ENSG00000166851/ENSG00000143476/ENSG00000012048/ENSG00000085840/ENSG00000094804/ENSG00000149948
GO:1902750	BP	GO:1902750	negative regulation of cell cycle G2/M phase transition	23	0.650451020679619	2.02096807340251	0.000131095962244363	0.00208369508595242	0.001585761645388	304	tags=43%, list=11%, signal=39%	ENSG00000170312/ENSG00000178999/ENSG00000092853/ENSG00000197299/ENSG00000166851/ENSG00000143476/ENSG00000012048/ENSG00000085840/ENSG00000094804/ENSG00000149948
GO:0140657	MF	GO:0140657	ATP-dependent activity	114	0.496190482651411	2.01949626178727	0.000106100795755968	0.00208369508595242	0.001585761645388	590	tags=45%, list=21%, signal=37%	ENSG00000121621/ENSG00000138778/ENSG00000186871/ENSG00000131747/ENSG00000186185/ENSG00000142945/ENSG00000118193/ENSG00000237649/ENSG00000090889/ENSG00000163808/ENSG00000138182/ENSG00000138160/ENSG00000137807/ENSG00000112984/ENSG00000051341/ENSG00000136492/ENSG00000197299/ENSG00000085999/ENSG00000100206/ENSG00000119969/ENSG00000071539/ENSG00000107201/ENSG00000186638/ENSG00000156802/ENSG00000196584…
GO:0009615	BP	GO:0009615	response to virus	90	0.508574929353207	2.01427169229227	0.000109039363210119	0.00208369508595242	0.001585761645388	675	tags=48%, list=25%, signal=37%	ENSG00000169245/ENSG00000023445/ENSG00000271503/ENSG00000138755/ENSG00000125538/ENSG00000179750/ENSG00000118503/ENSG00000111331/ENSG00000135114/ENSG00000137959/ENSG00000137965/ENSG00000107201/ENSG00000115267/ENSG00000028277/ENSG00000138646/ENSG00000117632/ENSG00000137462/ENSG00000149948/ENSG00000157601/ENSG00000134321/ENSG00000154760/ENSG00000117228/ENSG00000159110/ENSG00000136244/ENSG00000172183…
GO:0010639	BP	GO:0010639	negative regulation of organelle organization	79	0.511374122223078	1.99196957238027	0.00011059500110595	0.00208369508595242	0.001585761645388	750	tags=53%, list=27%, signal=40%	ENSG00000112742/ENSG00000117724/ENSG00000156970/ENSG00000131747/ENSG00000169679/ENSG00000178999/ENSG00000156509/ENSG00000080986/ENSG00000088325/ENSG00000135476/ENSG00000166851/ENSG00000164611/ENSG00000134057/ENSG00000071539/ENSG00000128342/ENSG00000136108/ENSG00000186638/ENSG00000012048/ENSG00000122952/ENSG00000164109/ENSG00000162063/ENSG00000117632/ENSG00000167513/ENSG00000112029/ENSG00000174442…
GO:0099513	CC	GO:0099513	polymeric cytoskeletal fiber	135	0.481290167268767	1.99141900229787	0.000104613453290093	0.00208369508595242	0.001585761645388	333	tags=29%, list=12%, signal=27%	ENSG00000117650/ENSG00000154839/ENSG00000170312/ENSG00000121621/ENSG00000066279/ENSG00000138778/ENSG00000186185/ENSG00000137804/ENSG00000122574/ENSG00000178999/ENSG00000076382/ENSG00000075218/ENSG00000142945/ENSG00000118193/ENSG00000237649/ENSG00000090889/ENSG00000163808/ENSG00000165480/ENSG00000138182/ENSG00000138160/ENSG00000137807/ENSG00000198901/ENSG00000087586/ENSG00000089685/ENSG00000088325…
GO:0070507	BP	GO:0070507	regulation of microtubule cytoskeleton organization	34	0.588811332789199	1.98475544366706	0.000124409056979348	0.00208369508595242	0.001585761645388	333	tags=38%, list=12%, signal=34%	ENSG00000154839/ENSG00000121621/ENSG00000076382/ENSG00000152503/ENSG00000163808/ENSG00000165480/ENSG00000088325/ENSG00000166851/ENSG00000013810/ENSG00000136108/ENSG00000117632/ENSG00000136122/ENSG00000134222
GO:0003697	MF	GO:0003697	single-stranded DNA binding	46	0.55262174109043	1.97689092364065	0.00011900511722004	0.00208369508595242	0.001585761645388	590	tags=52%, list=21%, signal=42%	ENSG00000065328/ENSG00000093009/ENSG00000109674/ENSG00000197299/ENSG00000111247/ENSG00000085999/ENSG00000100206/ENSG00000125885/ENSG00000160957/ENSG00000100297/ENSG00000104177/ENSG00000139618/ENSG00000164104/ENSG00000166801/ENSG00000113810/ENSG00000051180/ENSG00000125319/ENSG00000073111/ENSG00000163002/ENSG00000101868/ENSG00000104738/ENSG00000112118/ENSG00000136824/ENSG00000166508
GO:0051607	BP	GO:0051607	defense response to virus	70	0.515481837280742	1.97393350306203	0.00011258725512272	0.00208369508595242	0.001585761645388	527	tags=41%, list=19%, signal=34%	ENSG00000169245/ENSG00000023445/ENSG00000138755/ENSG00000125538/ENSG00000179750/ENSG00000118503/ENSG00000111331/ENSG00000135114/ENSG00000137959/ENSG00000107201/ENSG00000115267/ENSG00000138646/ENSG00000137462/ENSG00000157601/ENSG00000134321/ENSG00000154760/ENSG00000117228/ENSG00000159110/ENSG00000136244/ENSG00000172183/ENSG00000185745/ENSG00000117226/ENSG00000164430/ENSG00000141682/ENSG00000111335…
GO:0140546	BP	GO:0140546	defense response to symbiont	70	0.515481837280742	1.97393350306203	0.00011258725512272	0.00208369508595242	0.001585761645388	527	tags=41%, list=19%, signal=34%	ENSG00000169245/ENSG00000023445/ENSG00000138755/ENSG00000125538/ENSG00000179750/ENSG00000118503/ENSG00000111331/ENSG00000135114/ENSG00000137959/ENSG00000107201/ENSG00000115267/ENSG00000138646/ENSG00000137462/ENSG00000157601/ENSG00000134321/ENSG00000154760/ENSG00000117228/ENSG00000159110/ENSG00000136244/ENSG00000172183/ENSG00000185745/ENSG00000117226/ENSG00000164430/ENSG00000141682/ENSG00000111335…
GO:0034097	BP	GO:0034097	response to cytokine	198	0.460472693924488	1.96182861940295	0.000102239034863511	0.00208369508595242	0.001585761645388	676	tags=46%, list=25%, signal=38%	ENSG00000169245/ENSG00000169248/ENSG00000023445/ENSG00000271503/ENSG00000124882/ENSG00000138755/ENSG00000169429/ENSG00000163347/ENSG00000125538/ENSG00000124875/ENSG00000108691/ENSG00000118503/ENSG00000154451/ENSG00000168685/ENSG00000101057/ENSG00000162654/ENSG00000145777/ENSG00000113494/ENSG00000111331/ENSG00000134070/ENSG00000135114/ENSG00000170961/ENSG00000119969/ENSG00000056558/ENSG00000120217…
GO:0051054	BP	GO:0051054	positive regulation of DNA metabolic process	78	0.503876865069	1.95996230797752	0.000110705192073508	0.00208369508595242	0.001585761645388	760	tags=54%, list=28%, signal=40%	ENSG00000124882/ENSG00000129173/ENSG00000117650/ENSG00000170312/ENSG00000178999/ENSG00000111247/ENSG00000131153/ENSG00000012048/ENSG00000147536/ENSG00000133119/ENSG00000167513/ENSG00000101003/ENSG00000111206/ENSG00000161692/ENSG00000127586/ENSG00000188486/ENSG00000006634/ENSG00000181938/ENSG00000181544/ENSG00000111602/ENSG00000109685/ENSG00000136244/ENSG00000051180/ENSG00000123374/ENSG00000176208…
GO:0030545	MF	GO:0030545	signaling receptor regulator activity	86	0.496038937240386	1.95378142061932	0.000109745390693591	0.00208369508595242	0.001585761645388	676	tags=52%, list=25%, signal=41%	ENSG00000169245/ENSG00000169248/ENSG00000271503/ENSG00000124882/ENSG00000138755/ENSG00000169429/ENSG00000125538/ENSG00000124875/ENSG00000108691/ENSG00000008517/ENSG00000163235/ENSG00000145777/ENSG00000184599/ENSG00000113070/ENSG00000128342/ENSG00000108688/ENSG00000108702/ENSG00000134363/ENSG00000164400/ENSG00000150630/ENSG00000188710/ENSG00000181634/ENSG00000146918/ENSG00000163734/ENSG00000122641…
GO:0030546	MF	GO:0030546	signaling receptor activator activity	82	0.496809542778888	1.9453043983233	0.000110071546505228	0.00208369508595242	0.001585761645388	676	tags=52%, list=25%, signal=41%	ENSG00000169245/ENSG00000169248/ENSG00000271503/ENSG00000124882/ENSG00000138755/ENSG00000169429/ENSG00000125538/ENSG00000124875/ENSG00000108691/ENSG00000008517/ENSG00000163235/ENSG00000145777/ENSG00000184599/ENSG00000113070/ENSG00000128342/ENSG00000108688/ENSG00000108702/ENSG00000164400/ENSG00000150630/ENSG00000188710/ENSG00000181634/ENSG00000163734/ENSG00000122641/ENSG00000136689/ENSG00000164104…
GO:0048018	MF	GO:0048018	receptor ligand activity	82	0.496809542778888	1.9453043983233	0.000110071546505228	0.00208369508595242	0.001585761645388	676	tags=52%, list=25%, signal=41%	ENSG00000169245/ENSG00000169248/ENSG00000271503/ENSG00000124882/ENSG00000138755/ENSG00000169429/ENSG00000125538/ENSG00000124875/ENSG00000108691/ENSG00000008517/ENSG00000163235/ENSG00000145777/ENSG00000184599/ENSG00000113070/ENSG00000128342/ENSG00000108688/ENSG00000108702/ENSG00000164400/ENSG00000150630/ENSG00000188710/ENSG00000181634/ENSG00000163734/ENSG00000122641/ENSG00000136689/ENSG00000164104…
GO:1902806	BP	GO:1902806	regulation of cell cycle G1/S phase transition	52	0.532151181946097	1.94395286535065	0.000117178345441762	0.00208369508595242	0.001585761645388	556	tags=46%, list=20%, signal=38%	ENSG00000171848/ENSG00000108691/ENSG00000075218/ENSG00000118193/ENSG00000101447/ENSG00000094804/ENSG00000101412/ENSG00000106462/ENSG00000176907/ENSG00000123473/ENSG00000123080/ENSG00000122641/ENSG00000100911/ENSG00000080839/ENSG00000129355/ENSG00000124508/ENSG00000167325/ENSG00000156876/ENSG00000151849/ENSG00000123374/ENSG00000167034/ENSG00000015475/ENSG00000172167/ENSG00000121068
GO:0022412	BP	GO:0022412	cellular process involved in reproduction in multicellular organism	58	0.522878186679364	1.94287362768532	0.000115660421003932	0.00208369508595242	0.001585761645388	482	tags=43%, list=18%, signal=36%	ENSG00000124882/ENSG00000121621/ENSG00000066279/ENSG00000112742/ENSG00000131747/ENSG00000121152/ENSG00000137812/ENSG00000080986/ENSG00000185697/ENSG00000087586/ENSG00000136492/ENSG00000157456/ENSG00000166851/ENSG00000100206/ENSG00000071539/ENSG00000187741/ENSG00000120539/ENSG00000122641/ENSG00000112029/ENSG00000139618/ENSG00000138587/ENSG00000164104/ENSG00000123610/ENSG00000143452/ENSG00000175592
GO:0140640	MF	GO:0140640	catalytic activity, acting on a nucleic acid	112	0.477667917767409	1.93836641224726	0.000106337728626117	0.00208369508595242	0.001585761645388	943	tags=60%, list=34%, signal=41%	ENSG00000186871/ENSG00000131747/ENSG00000174371/ENSG00000051341/ENSG00000109674/ENSG00000136492/ENSG00000197299/ENSG00000085999/ENSG00000100206/ENSG00000119969/ENSG00000107201/ENSG00000196584/ENSG00000115267/ENSG00000125885/ENSG00000198056/ENSG00000133119/ENSG00000149948/ENSG00000160957/ENSG00000100297/ENSG00000127586/ENSG00000138658/ENSG00000104889/ENSG00000130589/ENSG00000168496/ENSG00000100479…
GO:0019953	BP	GO:0019953	sexual reproduction	112	0.474567797725293	1.92578619000487	0.000106337728626117	0.00208369508595242	0.001585761645388	420	tags=35%, list=15%, signal=31%	ENSG00000023445/ENSG00000124882/ENSG00000170312/ENSG00000121621/ENSG00000066279/ENSG00000112742/ENSG00000131747/ENSG00000121152/ENSG00000122574/ENSG00000137812/ENSG00000152503/ENSG00000073282/ENSG00000158402/ENSG00000080986/ENSG00000185697/ENSG00000087586/ENSG00000136492/ENSG00000157456/ENSG00000166851/ENSG00000164611/ENSG00000100206/ENSG00000105011/ENSG00000071539/ENSG00000187741/ENSG00000161800…
GO:0008284	BP	GO:0008284	positive regulation of cell population proliferation	170	0.448082832438415	1.88625913580578	0.000103327133705311	0.00208369508595242	0.001585761645388	578	tags=39%, list=21%, signal=33%	ENSG00000169245/ENSG00000271503/ENSG00000164283/ENSG00000124882/ENSG00000163347/ENSG00000125538/ENSG00000170312/ENSG00000066279/ENSG00000112742/ENSG00000118503/ENSG00000117399/ENSG00000183856/ENSG00000118193/ENSG00000073282/ENSG00000168685/ENSG00000138182/ENSG00000163235/ENSG00000145777/ENSG00000198901/ENSG00000089685/ENSG00000186193/ENSG00000113494/ENSG00000075702/ENSG00000197646/ENSG00000113070…
GO:0051338	BP	GO:0051338	regulation of transferase activity	197	0.434726272798334	1.85098197082316	0.000102343670044008	0.00208369508595242	0.001585761645388	465	tags=34%, list=17%, signal=30%	ENSG00000271503/ENSG00000124882/ENSG00000117650/ENSG00000125538/ENSG00000138778/ENSG00000156970/ENSG00000175063/ENSG00000118503/ENSG00000178999/ENSG00000117399/ENSG00000118193/ENSG00000158714/ENSG00000158402/ENSG00000163235/ENSG00000088325/ENSG00000092853/ENSG00000113494/ENSG00000100526/ENSG00000197299/ENSG00000157456/ENSG00000166851/ENSG00000113070/ENSG00000127564/ENSG00000134057/ENSG00000145386…
GO:0051347	BP	GO:0051347	positive regulation of transferase activity	133	0.443534457645154	1.83314734637337	0.00010465724751439	0.00208369508595242	0.001585761645388	513	tags=37%, list=19%, signal=31%	ENSG00000271503/ENSG00000124882/ENSG00000117650/ENSG00000125538/ENSG00000138778/ENSG00000175063/ENSG00000178999/ENSG00000117399/ENSG00000118193/ENSG00000163235/ENSG00000088325/ENSG00000092853/ENSG00000113494/ENSG00000166851/ENSG00000113070/ENSG00000134057/ENSG00000131153/ENSG00000094804/ENSG00000150630/ENSG00000147536/ENSG00000123975/ENSG00000181634/ENSG00000106462/ENSG00000136122/ENSG00000154928…
GO:0006954	BP	GO:0006954	inflammatory response	140	0.430272037633145	1.78584159531481	0.000104416831993317	0.00208369508595242	0.001585761645388	668	tags=44%, list=24%, signal=35%	ENSG00000169245/ENSG00000169248/ENSG00000023445/ENSG00000271503/ENSG00000050730/ENSG00000138755/ENSG00000169429/ENSG00000125538/ENSG00000124875/ENSG00000108691/ENSG00000118503/ENSG00000134198/ENSG00000168078/ENSG00000154451/ENSG00000158714/ENSG00000118113/ENSG00000145777/ENSG00000134070/ENSG00000184599/ENSG00000131203/ENSG00000112299/ENSG00000108688/ENSG00000187741/ENSG00000108702/ENSG00000144554…
GO:0099512	CC	GO:0099512	supramolecular fiber	163	0.42283452650833	1.77618969304848	0.000103412616339193	0.00208369508595242	0.001585761645388	333	tags=25%, list=12%, signal=23%	ENSG00000117650/ENSG00000154839/ENSG00000170312/ENSG00000121621/ENSG00000066279/ENSG00000138778/ENSG00000186185/ENSG00000137804/ENSG00000122574/ENSG00000178999/ENSG00000076382/ENSG00000075218/ENSG00000142945/ENSG00000118193/ENSG00000237649/ENSG00000090889/ENSG00000163808/ENSG00000165480/ENSG00000138182/ENSG00000138160/ENSG00000137807/ENSG00000198901/ENSG00000087586/ENSG00000089685/ENSG00000088325…
GO:0099081	CC	GO:0099081	supramolecular polymer	165	0.419268961255253	1.76249644490629	0.000103284445362528	0.00208369508595242	0.001585761645388	333	tags=24%, list=12%, signal=23%	ENSG00000117650/ENSG00000154839/ENSG00000170312/ENSG00000121621/ENSG00000066279/ENSG00000138778/ENSG00000186185/ENSG00000137804/ENSG00000122574/ENSG00000178999/ENSG00000076382/ENSG00000075218/ENSG00000142945/ENSG00000118193/ENSG00000237649/ENSG00000090889/ENSG00000163808/ENSG00000165480/ENSG00000138182/ENSG00000138160/ENSG00000137807/ENSG00000198901/ENSG00000087586/ENSG00000089685/ENSG00000088325…
GO:0045087	BP	GO:0045087	innate immune response	139	0.422652528608674	1.75357625139213	0.000104449550866931	0.00208369508595242	0.001585761645388	744	tags=45%, list=27%, signal=35%	ENSG00000169245/ENSG00000023445/ENSG00000271503/ENSG00000124882/ENSG00000163347/ENSG00000108691/ENSG00000179750/ENSG00000118503/ENSG00000154451/ENSG00000158714/ENSG00000162654/ENSG00000060140/ENSG00000111331/ENSG00000135114/ENSG00000112299/ENSG00000108688/ENSG00000108702/ENSG00000107201/ENSG00000115267/ENSG00000138646/ENSG00000104856/ENSG00000145365/ENSG00000137462/ENSG00000157601/ENSG00000134321…
GO:0098542	BP	GO:0098542	defense response to other organism	176	0.411732028193072	1.73899256723103	0.000102901831652603	0.00208369508595242	0.001585761645388	744	tags=44%, list=27%, signal=34%	ENSG00000169245/ENSG00000023445/ENSG00000271503/ENSG00000124882/ENSG00000138755/ENSG00000163347/ENSG00000125538/ENSG00000124875/ENSG00000108691/ENSG00000179750/ENSG00000118503/ENSG00000154451/ENSG00000158714/ENSG00000168685/ENSG00000162654/ENSG00000060140/ENSG00000111331/ENSG00000135114/ENSG00000112299/ENSG00000108688/ENSG00000137959/ENSG00000108702/ENSG00000107201/ENSG00000115267/ENSG00000138646…
GO:0032467	BP	GO:0032467	positive regulation of cytokinesis	11	0.802275214531105	2.07046622238471	0.000146520146520147	0.00210294576700018	0.00160041205746553	448	tags=82%, list=16%, signal=69%	ENSG00000178999/ENSG00000118193/ENSG00000138182/ENSG00000137807/ENSG00000122966/ENSG00000161800/ENSG00000094804/ENSG00000114346/ENSG00000213024
GO:0051382	BP	GO:0051382	kinetochore assembly	12	0.773690925933238	2.04231349828415	0.000144446049400549	0.00210294576700018	0.00160041205746553	441	tags=75%, list=16%, signal=63%	ENSG00000138778/ENSG00000117724/ENSG00000126787/ENSG00000115163/ENSG00000123219/ENSG00000166451/ENSG00000184445/ENSG00000203760/ENSG00000153044
GO:0061844	BP	GO:0061844	antimicrobial humoral immune response mediated by antimicrobial peptide	10	0.808286469308326	2.03411274290125	0.0001478633742422	0.00210294576700018	0.00160041205746553	28	tags=50%, list=1%, signal=50%	ENSG00000169245/ENSG00000169248/ENSG00000138755/ENSG00000169429/ENSG00000124875
GO:1902751	BP	GO:1902751	positive regulation of cell cycle G2/M phase transition	11	0.786643586446324	2.03012500609856	0.000146520146520147	0.00210294576700018	0.00160041205746553	539	tags=91%, list=20%, signal=73%	ENSG00000170312/ENSG00000158402/ENSG00000134057/ENSG00000143476/ENSG00000164045/ENSG00000161692/ENSG00000112029/ENSG00000167325/ENSG00000176208/ENSG00000097046
GO:0051315	BP	GO:0051315	attachment of mitotic spindle microtubules to kinetochore	10	0.799160728480116	2.01114714046706	0.0001478633742422	0.00210294576700018	0.00160041205746553	307	tags=60%, list=11%, signal=54%	ENSG00000138778/ENSG00000143228/ENSG00000178999/ENSG00000142945/ENSG00000080986/ENSG00000167513
GO:0000152	CC	GO:0000152	nuclear ubiquitin ligase complex	10	0.795707822452959	2.00245764680785	0.0001478633742422	0.00210294576700018	0.00160041205746553	440	tags=80%, list=16%, signal=67%	ENSG00000156970/ENSG00000175063/ENSG00000117399/ENSG00000138376/ENSG00000012048/ENSG00000139618/ENSG00000108106/ENSG00000051180
GO:1904666	BP	GO:1904666	regulation of ubiquitin protein ligase activity	10	0.795292428548907	2.00141227729389	0.0001478633742422	0.00210294576700018	0.00160041205746553	372	tags=70%, list=14%, signal=61%	ENSG00000175063/ENSG00000117399/ENSG00000166851/ENSG00000164109/ENSG00000120539/ENSG00000112029/ENSG00000108106
GO:0010971	BP	GO:0010971	positive regulation of G2/M transition of mitotic cell cycle	10	0.785058489670843	1.97565781241988	0.0001478633742422	0.00210294576700018	0.00160041205746553	539	tags=90%, list=20%, signal=73%	ENSG00000170312/ENSG00000158402/ENSG00000134057/ENSG00000143476/ENSG00000164045/ENSG00000161692/ENSG00000112029/ENSG00000167325/ENSG00000097046
GO:0032504	BP	GO:0032504	multicellular organism reproduction	119	0.442563101761166	1.80811469723878	0.000211662609799979	0.00292895287074565	0.00222903108755691	420	tags=33%, list=15%, signal=29%	ENSG00000023445/ENSG00000124882/ENSG00000121621/ENSG00000066279/ENSG00000112742/ENSG00000131747/ENSG00000121152/ENSG00000122574/ENSG00000137812/ENSG00000073282/ENSG00000158402/ENSG00000080986/ENSG00000185697/ENSG00000087586/ENSG00000136492/ENSG00000157456/ENSG00000166851/ENSG00000164611/ENSG00000170961/ENSG00000100206/ENSG00000105011/ENSG00000071539/ENSG00000128342/ENSG00000187741/ENSG00000161800…
GO:0048609	BP	GO:0048609	multicellular organismal reproductive process	119	0.442563101761166	1.80811469723878	0.000211662609799979	0.00292895287074565	0.00222903108755691	420	tags=33%, list=15%, signal=29%	ENSG00000023445/ENSG00000124882/ENSG00000121621/ENSG00000066279/ENSG00000112742/ENSG00000131747/ENSG00000121152/ENSG00000122574/ENSG00000137812/ENSG00000073282/ENSG00000158402/ENSG00000080986/ENSG00000185697/ENSG00000087586/ENSG00000136492/ENSG00000157456/ENSG00000166851/ENSG00000164611/ENSG00000170961/ENSG00000100206/ENSG00000105011/ENSG00000071539/ENSG00000128342/ENSG00000187741/ENSG00000161800…
GO:0017111	MF	GO:0017111	nucleoside-triphosphatase activity	124	0.439888548339383	1.80605300643063	0.0002106149957877	0.00292895287074565	0.00222903108755691	590	tags=37%, list=21%, signal=31%	ENSG00000121621/ENSG00000186871/ENSG00000186185/ENSG00000142945/ENSG00000118193/ENSG00000237649/ENSG00000154451/ENSG00000163808/ENSG00000138182/ENSG00000137807/ENSG00000162654/ENSG00000112984/ENSG00000136492/ENSG00000197299/ENSG00000085999/ENSG00000071539/ENSG00000166592/ENSG00000107201/ENSG00000156802/ENSG00000085840/ENSG00000079616/ENSG00000115267/ENSG00000125885/ENSG00000157601/ENSG00000160957…
GO:0071396	BP	GO:0071396	cellular response to lipid	121	0.432343529274169	1.76919712188483	0.00021137180300148	0.00292895287074565	0.00222903108755691	520	tags=32%, list=19%, signal=27%	ENSG00000169245/ENSG00000169248/ENSG00000271503/ENSG00000050730/ENSG00000138755/ENSG00000169429/ENSG00000163347/ENSG00000125538/ENSG00000121621/ENSG00000124875/ENSG00000108691/ENSG00000118503/ENSG00000073282/ENSG00000134070/ENSG00000197646/ENSG00000145386/ENSG00000134326/ENSG00000120217/ENSG00000012048/ENSG00000180616/ENSG00000164400/ENSG00000164171/ENSG00000101412/ENSG00000137462/ENSG00000100906…
GO:0045859	BP	GO:0045859	regulation of protein kinase activity	133	0.427491761899397	1.76684218196484	0.000209314495028781	0.00292895287074565	0.00222903108755691	465	tags=35%, list=17%, signal=30%	ENSG00000271503/ENSG00000124882/ENSG00000125538/ENSG00000138778/ENSG00000118503/ENSG00000118193/ENSG00000158402/ENSG00000163235/ENSG00000088325/ENSG00000092853/ENSG00000113494/ENSG00000100526/ENSG00000197299/ENSG00000157456/ENSG00000166851/ENSG00000113070/ENSG00000127564/ENSG00000134057/ENSG00000145386/ENSG00000151490/ENSG00000175305/ENSG00000162063/ENSG00000138646/ENSG00000094804/ENSG00000164045…
GO:0051129	BP	GO:0051129	negative regulation of cellular component organization	134	0.407597419553549	1.68572934282054	0.000209183139838929	0.00292895287074565	0.00222903108755691	535	tags=31%, list=19%, signal=27%	ENSG00000169245/ENSG00000125538/ENSG00000112742/ENSG00000117724/ENSG00000156970/ENSG00000131747/ENSG00000169679/ENSG00000178999/ENSG00000118193/ENSG00000156509/ENSG00000080986/ENSG00000088325/ENSG00000135476/ENSG00000166851/ENSG00000164611/ENSG00000134057/ENSG00000071539/ENSG00000128342/ENSG00000151490/ENSG00000136108/ENSG00000065320/ENSG00000186638/ENSG00000012048/ENSG00000122952/ENSG00000164109…
GO:0044843	BP	GO:0044843	cell cycle G1/S phase transition	74	0.511586283317332	1.97470569995732	0.000222890894906943	0.00307049699172255	0.00233675089727789	610	tags=45%, list=22%, signal=36%	ENSG00000171848/ENSG00000108691/ENSG00000075218/ENSG00000183856/ENSG00000118193/ENSG00000101447/ENSG00000100526/ENSG00000145386/ENSG00000175305/ENSG00000094804/ENSG00000164045/ENSG00000101412/ENSG00000106462/ENSG00000176907/ENSG00000123473/ENSG00000123080/ENSG00000122641/ENSG00000006634/ENSG00000100911/ENSG00000080839/ENSG00000129355/ENSG00000124508/ENSG00000167325/ENSG00000156876/ENSG00000151849…
GO:0042770	BP	GO:0042770	signal transduction in response to DNA damage	52	0.523844365371854	1.91360799263537	0.000234356690883525	0.0032140346178312	0.00244598783107288	495	tags=38%, list=18%, signal=32%	ENSG00000170312/ENSG00000075218/ENSG00000092853/ENSG00000136492/ENSG00000197299/ENSG00000166851/ENSG00000154920/ENSG00000143476/ENSG00000012048/ENSG00000144554/ENSG00000092470/ENSG00000101412/ENSG00000149948/ENSG00000111206/ENSG00000188486/ENSG00000139618/ENSG00000141682/ENSG00000123374/ENSG00000015475/ENSG00000176208
GO:0000781	CC	GO:0000781	chromosome, telomeric region	49	0.534654063197984	1.93121128895557	0.000236322816967978	0.00322659419433613	0.00245554608882283	943	tags=67%, list=34%, signal=45%	ENSG00000170312/ENSG00000197299/ENSG00000111247/ENSG00000197061/ENSG00000100206/ENSG00000085840/ENSG00000106462/ENSG00000160957/ENSG00000100297/ENSG00000188486/ENSG00000139618/ENSG00000168496/ENSG00000051180/ENSG00000123374/ENSG00000138346/ENSG00000073111/ENSG00000099284/ENSG00000104738/ENSG00000062822/ENSG00000112118/ENSG00000166508/ENSG00000141499/ENSG00000118655/ENSG00000132646/ENSG00000140451…
GO:0019207	MF	GO:0019207	kinase regulator activity	43	0.546504067088402	1.92760349902898	0.000241254523522316	0.00327935352327679	0.00249569770257599	433	tags=42%, list=16%, signal=36%	ENSG00000169245/ENSG00000271503/ENSG00000088325/ENSG00000157456/ENSG00000134057/ENSG00000145386/ENSG00000122966/ENSG00000175305/ENSG00000162063/ENSG00000123975/ENSG00000146918/ENSG00000149503/ENSG00000161692/ENSG00000123080/ENSG00000006634/ENSG00000125845/ENSG00000129355/ENSG00000173207
GO:0019887	MF	GO:0019887	protein kinase regulator activity	41	0.562142585369739	1.96321143903868	0.00024265954865324	0.00328392129278745	0.00249917392793343	433	tags=44%, list=16%, signal=38%	ENSG00000169245/ENSG00000271503/ENSG00000088325/ENSG00000157456/ENSG00000134057/ENSG00000145386/ENSG00000122966/ENSG00000175305/ENSG00000162063/ENSG00000123975/ENSG00000146918/ENSG00000149503/ENSG00000161692/ENSG00000123080/ENSG00000006634/ENSG00000125845/ENSG00000129355/ENSG00000173207
GO:0016572	BP	GO:0016572	histone phosphorylation	16	0.707231051306665	2.01451429339501	0.000277700638711469	0.00374165071105979	0.00284752132307559	522	tags=62%, list=19%, signal=51%	ENSG00000125538/ENSG00000170312/ENSG00000178999/ENSG00000087586/ENSG00000145386/ENSG00000177602/ENSG00000149948/ENSG00000149503/ENSG00000123374/ENSG00000100749
GO:0007076	BP	GO:0007076	mitotic chromosome condensation	10	0.758557843138946	1.90896697340116	0.0002957267484844	0.00396712913250689	0.00301911794246772	608	tags=90%, list=22%, signal=70%	ENSG00000109805/ENSG00000121152/ENSG00000137804/ENSG00000166851/ENSG00000146670/ENSG00000113810/ENSG00000151503/ENSG00000136824/ENSG00000010292
GO:0070925	BP	GO:0070925	organelle assembly	167	0.396342434194031	1.6678590987959	0.000309661436829067	0.0041359997127778	0.00314763410158974	468	tags=27%, list=17%, signal=24%	ENSG00000117650/ENSG00000066279/ENSG00000138778/ENSG00000117724/ENSG00000137812/ENSG00000178999/ENSG00000126787/ENSG00000076382/ENSG00000115163/ENSG00000011426/ENSG00000117399/ENSG00000237649/ENSG00000090889/ENSG00000163808/ENSG00000138160/ENSG00000080986/ENSG00000137807/ENSG00000101057/ENSG00000198901/ENSG00000087586/ENSG00000088325/ENSG00000075702/ENSG00000142731/ENSG00000157456/ENSG00000166851…
GO:0043549	BP	GO:0043549	regulation of kinase activity	156	0.408719948588338	1.71071898704082	0.000311203319502075	0.0041385999892224	0.00314961299892508	465	tags=33%, list=17%, signal=29%	ENSG00000271503/ENSG00000124882/ENSG00000125538/ENSG00000138778/ENSG00000118503/ENSG00000118193/ENSG00000158714/ENSG00000158402/ENSG00000163235/ENSG00000088325/ENSG00000092853/ENSG00000113494/ENSG00000100526/ENSG00000197299/ENSG00000157456/ENSG00000166851/ENSG00000113070/ENSG00000127564/ENSG00000134057/ENSG00000145386/ENSG00000151490/ENSG00000175305/ENSG00000162063/ENSG00000138646/ENSG00000094804…
GO:0000082	BP	GO:0000082	G1/S transition of mitotic cell cycle	66	0.488932709894797	1.85624067171255	0.000339635457941809	0.00449724192585016	0.0034225515067548	645	tags=44%, list=23%, signal=34%	ENSG00000171848/ENSG00000108691/ENSG00000075218/ENSG00000183856/ENSG00000118193/ENSG00000100526/ENSG00000175305/ENSG00000094804/ENSG00000164045/ENSG00000101412/ENSG00000106462/ENSG00000123473/ENSG00000123080/ENSG00000122641/ENSG00000006634/ENSG00000100911/ENSG00000080839/ENSG00000129355/ENSG00000124508/ENSG00000167325/ENSG00000156876/ENSG00000151849/ENSG00000123374/ENSG00000015475/ENSG00000172167…
GO:0099565	BP	GO:0099565	chemical synaptic transmission, postsynaptic	14	-0.675342222991167	-2.26625755419281	0.000343170899107756	0.00452455365690569	0.0034433366474738	712	tags=86%, list=26%, signal=64%	ENSG00000135124/ENSG00000079841/ENSG00000008735/ENSG00000205363/ENSG00000081189/ENSG00000104936/ENSG00000149582/ENSG00000163485/ENSG00000099957/ENSG00000196338/ENSG00000120899/ENSG00000089041
GO:0060078	BP	GO:0060078	regulation of postsynaptic membrane potential	15	-0.676297592358029	-2.33061981327716	0.000348553502962705	0.00456968320631505	0.00347768174384105	718	tags=87%, list=26%, signal=64%	ENSG00000102287/ENSG00000135124/ENSG00000079841/ENSG00000008735/ENSG00000205363/ENSG00000081189/ENSG00000104936/ENSG00000149582/ENSG00000163485/ENSG00000099957/ENSG00000196338/ENSG00000120899/ENSG00000089041
GO:0019058	BP	GO:0019058	viral life cycle	55	0.505858095330988	1.86432959484829	0.000349568865066418	0.00456968320631505	0.00347768174384105	478	tags=38%, list=17%, signal=32%	ENSG00000271503/ENSG00000169429/ENSG00000163347/ENSG00000170312/ENSG00000108691/ENSG00000179750/ENSG00000131747/ENSG00000111331/ENSG00000135114/ENSG00000115267/ENSG00000164171/ENSG00000149948/ENSG00000157601/ENSG00000134321/ENSG00000182481/ENSG00000145901/ENSG00000090339/ENSG00000166801/ENSG00000172183/ENSG00000185745/ENSG00000111335
GO:0071356	BP	GO:0071356	cellular response to tumor necrosis factor	50	0.514577308413967	1.86615842064162	0.000352941176470588	0.00457483246463142	0.00348160050162637	727	tags=56%, list=26%, signal=42%	ENSG00000023445/ENSG00000271503/ENSG00000169429/ENSG00000163347/ENSG00000108691/ENSG00000118503/ENSG00000170961/ENSG00000056558/ENSG00000108688/ENSG00000108702/ENSG00000012048/ENSG00000100906/ENSG00000153823/ENSG00000183763/ENSG00000117228/ENSG00000127191/ENSG00000117226/ENSG00000167034/ENSG00000110330/ENSG00000162692/ENSG00000115009/ENSG00000116815/ENSG00000197442/ENSG00000109320/ENSG00000125726…
GO:0030595	BP	GO:0030595	leukocyte chemotaxis	50	0.511502962954399	1.85500904507934	0.000352941176470588	0.00457483246463142	0.00348160050162637	695	tags=56%, list=25%, signal=43%	ENSG00000169245/ENSG00000169248/ENSG00000271503/ENSG00000138755/ENSG00000169429/ENSG00000125538/ENSG00000124875/ENSG00000108691/ENSG00000158714/ENSG00000108688/ENSG00000108702/ENSG00000151490/ENSG00000150630/ENSG00000163734/ENSG00000106366/ENSG00000163737/ENSG00000123610/ENSG00000114251/ENSG00000136244/ENSG00000115009/ENSG00000171608/ENSG00000145147/ENSG00000157368/ENSG00000171049/ENSG00000081041…
GO:0097529	BP	GO:0097529	myeloid leukocyte migration	48	0.513224580907543	1.8477629963389	0.000355281856939839	0.00458582296016464	0.0034899646362821	659	tags=54%, list=24%, signal=42%	ENSG00000169245/ENSG00000169248/ENSG00000271503/ENSG00000138755/ENSG00000169429/ENSG00000125538/ENSG00000124875/ENSG00000108691/ENSG00000158714/ENSG00000108688/ENSG00000108702/ENSG00000151490/ENSG00000150630/ENSG00000163734/ENSG00000106366/ENSG00000163737/ENSG00000123610/ENSG00000091972/ENSG00000136244/ENSG00000115009/ENSG00000171608/ENSG00000145147/ENSG00000157368/ENSG00000171049/ENSG00000081041…
GO:2000045	BP	GO:2000045	regulation of G1/S transition of mitotic cell cycle	45	0.526783326212966	1.87769902709598	0.000357739088957787	0.00459821958693858	0.00349939888383724	521	tags=44%, list=19%, signal=37%	ENSG00000171848/ENSG00000108691/ENSG00000075218/ENSG00000118193/ENSG00000094804/ENSG00000101412/ENSG00000106462/ENSG00000123473/ENSG00000123080/ENSG00000122641/ENSG00000100911/ENSG00000080839/ENSG00000129355/ENSG00000124508/ENSG00000167325/ENSG00000156876/ENSG00000151849/ENSG00000123374/ENSG00000015475/ENSG00000172167
GO:0000077	BP	GO:0000077	DNA damage checkpoint signaling	38	0.585663099117865	2.01796318486941	0.000368188512518409	0.00471281296023564	0.00358660827326047	335	tags=37%, list=12%, signal=33%	ENSG00000170312/ENSG00000075218/ENSG00000092853/ENSG00000136492/ENSG00000197299/ENSG00000166851/ENSG00000154920/ENSG00000143476/ENSG00000012048/ENSG00000144554/ENSG00000092470/ENSG00000101412/ENSG00000149948/ENSG00000188486
GO:1903900	BP	GO:1903900	regulation of viral life cycle	32	0.596737950620563	1.9867521242385	0.000375657400450789	0.00476867576109431	0.00362912173293259	478	tags=50%, list=17%, signal=42%	ENSG00000271503/ENSG00000169429/ENSG00000179750/ENSG00000131747/ENSG00000111331/ENSG00000135114/ENSG00000115267/ENSG00000149948/ENSG00000157601/ENSG00000134321/ENSG00000182481/ENSG00000145901/ENSG00000166801/ENSG00000172183/ENSG00000185745/ENSG00000111335
GO:0044774	BP	GO:0044774	mitotic DNA integrity checkpoint signaling	32	0.594017372829568	1.97769435658723	0.000375657400450789	0.00476867576109431	0.00362912173293259	304	tags=38%, list=11%, signal=34%	ENSG00000170312/ENSG00000075218/ENSG00000092853/ENSG00000197299/ENSG00000166851/ENSG00000154920/ENSG00000143476/ENSG00000012048/ENSG00000144554/ENSG00000085840/ENSG00000094804/ENSG00000149948
GO:0003684	MF	GO:0003684	damaged DNA binding	25	0.624709994600117	1.97821077998978	0.000387697079348669	0.00490125690435848	0.00373002041686547	943	tags=88%, list=34%, signal=58%	ENSG00000073282/ENSG00000051341/ENSG00000109674/ENSG00000197299/ENSG00000127423/ENSG00000012048/ENSG00000160957/ENSG00000188486/ENSG00000164104/ENSG00000168496/ENSG00000062822/ENSG00000221829/ENSG00000186280/ENSG00000118655/ENSG00000070950/ENSG00000132646/ENSG00000073050/ENSG00000104320/ENSG00000106399/ENSG00000117748/ENSG00000101773/ENSG00000095002
GO:0044818	BP	GO:0044818	mitotic G2/M transition checkpoint	21	0.649092976183079	1.97363922516431	0.00040016006402561	0.00503808080609293	0.00383414798188473	304	tags=43%, list=11%, signal=38%	ENSG00000170312/ENSG00000092853/ENSG00000197299/ENSG00000166851/ENSG00000143476/ENSG00000012048/ENSG00000085840/ENSG00000094804/ENSG00000149948
GO:0051438	BP	GO:0051438	regulation of ubiquitin-protein transferase activity	19	0.668123229950195	1.98735287541422	0.000405844155844156	0.00508878876225815	0.00387273843235175	372	tags=42%, list=14%, signal=37%	ENSG00000156970/ENSG00000175063/ENSG00000117399/ENSG00000166851/ENSG00000164109/ENSG00000120539/ENSG00000112029/ENSG00000108106
GO:1902808	BP	GO:1902808	positive regulation of cell cycle G1/S phase transition	15	0.709466267216488	1.98723364926337	0.000420580400953316	0.00520977012793784	0.00396480929761169	556	tags=67%, list=20%, signal=53%	ENSG00000171848/ENSG00000101447/ENSG00000094804/ENSG00000106462/ENSG00000123473/ENSG00000167325/ENSG00000156876/ENSG00000151849/ENSG00000172167/ENSG00000121068
GO:0046605	BP	GO:0046605	regulation of centrosome cycle	15	0.706846297013909	1.97989504391	0.000420580400953316	0.00520977012793784	0.00396480929761169	450	tags=67%, list=16%, signal=56%	ENSG00000087586/ENSG00000075702/ENSG00000142731/ENSG00000012048/ENSG00000162063/ENSG00000123473/ENSG00000178295/ENSG00000156876/ENSG00000213024/ENSG00000151849
GO:0040001	BP	GO:0040001	establishment of mitotic spindle localization	15	0.700201069462499	1.96128158699543	0.000420580400953316	0.00520977012793784	0.00396480929761169	232	tags=47%, list=8%, signal=43%	ENSG00000137804/ENSG00000115163/ENSG00000080986/ENSG00000186193/ENSG00000135476/ENSG00000166851/ENSG00000164109
GO:0019730	BP	GO:0019730	antimicrobial humoral response	12	0.74467237336269	1.96571316651212	0.000433338148201647	0.00534624414166851	0.00406867058615877	28	tags=42%, list=1%, signal=41%	ENSG00000169245/ENSG00000169248/ENSG00000138755/ENSG00000169429/ENSG00000124875
GO:0032506	BP	GO:0032506	cytokinetic process	11	0.75993475998369	1.96119638655652	0.00043956043956044	0.00535845107273679	0.00407796046893791	448	tags=73%, list=16%, signal=61%	ENSG00000178999/ENSG00000011426/ENSG00000138180/ENSG00000138182/ENSG00000112984/ENSG00000161800/ENSG00000114346/ENSG00000213024
GO:0031663	BP	GO:0031663	lipopolysaccharide-mediated signaling pathway	11	0.757182616432258	1.95409381108219	0.00043956043956044	0.00535845107273679	0.00407796046893791	300	tags=64%, list=11%, signal=57%	ENSG00000271503/ENSG00000125538/ENSG00000108691/ENSG00000118503/ENSG00000134070/ENSG00000137462/ENSG00000100906
GO:0051307	BP	GO:0051307	meiotic chromosome separation	11	0.75658984120667	1.95256401051025	0.00043956043956044	0.00535845107273679	0.00407796046893791	170	tags=45%, list=6%, signal=43%	ENSG00000112742/ENSG00000131747/ENSG00000121152/ENSG00000135476/ENSG00000154920
GO:1900262	BP	GO:1900262	regulation of DNA-directed DNA polymerase activity	10	0.753189938024061	1.89545824275741	0.000443590122726601	0.00536499550006345	0.00408294099699867	687	tags=100%, list=25%, signal=75%	ENSG00000131153/ENSG00000147536/ENSG00000133119/ENSG00000101003/ENSG00000127586/ENSG00000181938/ENSG00000049541/ENSG00000163918/ENSG00000111445/ENSG00000132646
GO:1900264	BP	GO:1900264	positive regulation of DNA-directed DNA polymerase activity	10	0.753189938024061	1.89545824275741	0.000443590122726601	0.00536499550006345	0.00408294099699867	687	tags=100%, list=25%, signal=75%	ENSG00000131153/ENSG00000147536/ENSG00000133119/ENSG00000101003/ENSG00000127586/ENSG00000181938/ENSG00000049541/ENSG00000163918/ENSG00000111445/ENSG00000132646
GO:0002696	BP	GO:0002696	positive regulation of leukocyte activation	60	0.49267852605608	1.84118894785485	0.000459875833524948	0.00554015121799467	0.00421624035607393	592	tags=45%, list=22%, signal=36%	ENSG00000271503/ENSG00000125538/ENSG00000108691/ENSG00000168685/ENSG00000118113/ENSG00000145777/ENSG00000118513/ENSG00000112149/ENSG00000184599/ENSG00000197646/ENSG00000120217/ENSG00000112299/ENSG00000104951/ENSG00000004468/ENSG00000134470/ENSG00000114251/ENSG00000104998/ENSG00000109685/ENSG00000124508/ENSG00000136244/ENSG00000162692/ENSG00000176208/ENSG00000164136/ENSG00000104312/ENSG00000198805…
GO:0031396	BP	GO:0031396	regulation of protein ubiquitination	47	0.514290234947381	1.84607400388651	0.000474327048499941	0.00569192458199929	0.0043317449618354	521	tags=32%, list=19%, signal=26%	ENSG00000023445/ENSG00000156970/ENSG00000175063/ENSG00000118503/ENSG00000117399/ENSG00000166851/ENSG00000140525/ENSG00000012048/ENSG00000164109/ENSG00000120539/ENSG00000112029/ENSG00000108106/ENSG00000110330/ENSG00000104312/ENSG00000172167
GO:0031497	BP	GO:0031497	chromatin assembly	32	0.589058652244397	1.96118501836624	0.000500876533934385	0.00598713117605615	0.00455640705250162	859	tags=75%, list=31%, signal=52%	ENSG00000123485/ENSG00000197061/ENSG00000105011/ENSG00000119969/ENSG00000104147/ENSG00000106462/ENSG00000149948/ENSG00000188486/ENSG00000101945/ENSG00000203760/ENSG00000164104/ENSG00000159055/ENSG00000123374/ENSG00000167670/ENSG00000159259/ENSG00000073111/ENSG00000099284/ENSG00000132780/ENSG00000130816/ENSG00000198604/ENSG00000124201/ENSG00000128708/ENSG00000124635/ENSG00000139687
GO:0016462	MF	GO:0016462	pyrophosphatase activity	136	0.40711174788765	1.68585491818455	0.000522957849597323	0.00617894813062683	0.00470238616986094	590	tags=34%, list=21%, signal=28%	ENSG00000121621/ENSG00000186871/ENSG00000186185/ENSG00000142945/ENSG00000118193/ENSG00000237649/ENSG00000154451/ENSG00000163808/ENSG00000138182/ENSG00000137807/ENSG00000162654/ENSG00000112984/ENSG00000136492/ENSG00000197299/ENSG00000085999/ENSG00000071539/ENSG00000166592/ENSG00000107201/ENSG00000156802/ENSG00000085840/ENSG00000079616/ENSG00000115267/ENSG00000125885/ENSG00000157601/ENSG00000160957…
GO:0016817	MF	GO:0016817	hydrolase activity, acting on acid anhydrides	136	0.40711174788765	1.68585491818455	0.000522957849597323	0.00617894813062683	0.00470238616986094	590	tags=34%, list=21%, signal=28%	ENSG00000121621/ENSG00000186871/ENSG00000186185/ENSG00000142945/ENSG00000118193/ENSG00000237649/ENSG00000154451/ENSG00000163808/ENSG00000138182/ENSG00000137807/ENSG00000162654/ENSG00000112984/ENSG00000136492/ENSG00000197299/ENSG00000085999/ENSG00000071539/ENSG00000166592/ENSG00000107201/ENSG00000156802/ENSG00000085840/ENSG00000079616/ENSG00000115267/ENSG00000125885/ENSG00000157601/ENSG00000160957…
GO:0016818	MF	GO:0016818	hydrolase activity, acting on acid anhydrides, in phosphorus-containing anhydrides	136	0.40711174788765	1.68585491818455	0.000522957849597323	0.00617894813062683	0.00470238616986094	590	tags=34%, list=21%, signal=28%	ENSG00000121621/ENSG00000186871/ENSG00000186185/ENSG00000142945/ENSG00000118193/ENSG00000237649/ENSG00000154451/ENSG00000163808/ENSG00000138182/ENSG00000137807/ENSG00000162654/ENSG00000112984/ENSG00000136492/ENSG00000197299/ENSG00000085999/ENSG00000071539/ENSG00000166592/ENSG00000107201/ENSG00000156802/ENSG00000085840/ENSG00000079616/ENSG00000115267/ENSG00000125885/ENSG00000157601/ENSG00000160957…
GO:0072676	BP	GO:0072676	lymphocyte migration	22	0.641072362075059	1.96875522399038	0.00053071513864933	0.00624657818364269	0.00475385490195669	543	tags=55%, list=20%, signal=44%	ENSG00000169245/ENSG00000169248/ENSG00000271503/ENSG00000108691/ENSG00000108688/ENSG00000108702/ENSG00000090339/ENSG00000091972/ENSG00000114251/ENSG00000104998/ENSG00000115009/ENSG00000171608
GO:0051785	BP	GO:0051785	positive regulation of nuclear division	17	0.675421440764588	1.95710835120942	0.000547720115021224	0.00642212287536336	0.00488745028309417	448	tags=65%, list=16%, signal=55%	ENSG00000124882/ENSG00000125538/ENSG00000137804/ENSG00000126787/ENSG00000163235/ENSG00000087586/ENSG00000135476/ENSG00000111247/ENSG00000167513/ENSG00000114251/ENSG00000213024
GO:0015267	MF	GO:0015267	channel activity	40	-0.431710042387461	-1.99258422543019	0.000561797752808989	0.0065126139495442	0.0049563170168372	790	tags=62%, list=29%, signal=45%	ENSG00000103249/ENSG00000011021/ENSG00000102287/ENSG00000135124/ENSG00000156486/ENSG00000164051/ENSG00000115204/ENSG00000186815/ENSG00000152661/ENSG00000055732/ENSG00000151067/ENSG00000138172/ENSG00000152049/ENSG00000178301/ENSG00000169583/ENSG00000141540/ENSG00000124249/ENSG00000099957/ENSG00000136531/ENSG00000120899/ENSG00000089041/ENSG00000169432/ENSG00000171385/ENSG00000166473/ENSG00000171227
GO:0022803	MF	GO:0022803	passive transmembrane transporter activity	40	-0.431710042387461	-1.99258422543019	0.000561797752808989	0.0065126139495442	0.0049563170168372	790	tags=62%, list=29%, signal=45%	ENSG00000103249/ENSG00000011021/ENSG00000102287/ENSG00000135124/ENSG00000156486/ENSG00000164051/ENSG00000115204/ENSG00000186815/ENSG00000152661/ENSG00000055732/ENSG00000151067/ENSG00000138172/ENSG00000152049/ENSG00000178301/ENSG00000169583/ENSG00000141540/ENSG00000124249/ENSG00000099957/ENSG00000136531/ENSG00000120899/ENSG00000089041/ENSG00000169432/ENSG00000171385/ENSG00000166473/ENSG00000171227
GO:0014069	CC	GO:0014069	postsynaptic density	40	-0.399957961362612	-1.84603054457346	0.000561797752808989	0.0065126139495442	0.0049563170168372	745	tags=57%, list=27%, signal=43%	ENSG00000165802/ENSG00000052126/ENSG00000135124/ENSG00000204314/ENSG00000008735/ENSG00000185920/ENSG00000161835/ENSG00000205363/ENSG00000151067/ENSG00000103319/ENSG00000130787/ENSG00000164850/ENSG00000185345/ENSG00000109846/ENSG00000128482/ENSG00000163485/ENSG00000133083/ENSG00000149970/ENSG00000101463/ENSG00000099864/ENSG00000099957/ENSG00000120899/ENSG00000171385
GO:0003018	BP	GO:0003018	vascular process in circulatory system	42	-0.418714200512884	-1.96585297776762	0.0005720823798627	0.00653509261770666	0.00497342403506253	452	tags=43%, list=16%, signal=36%	ENSG00000164850/ENSG00000059804/ENSG00000184489/ENSG00000164867/ENSG00000114923/ENSG00000274286/ENSG00000075073/ENSG00000116741/ENSG00000164638/ENSG00000163485/ENSG00000172572/ENSG00000101400/ENSG00000164251/ENSG00000184160/ENSG00000135914/ENSG00000169418/ENSG00000074370/ENSG00000113389
GO:0007019	BP	GO:0007019	microtubule depolymerization	13	0.727812689033955	1.96439010255904	0.000572246065808298	0.00653509261770666	0.00497342403506253	277	tags=54%, list=10%, signal=49%	ENSG00000121621/ENSG00000186185/ENSG00000142945/ENSG00000088325/ENSG00000136108/ENSG00000186638/ENSG00000117632
GO:0098984	CC	GO:0098984	neuron to neuron synapse	42	-0.413274746872103	-1.94031487534822	0.0005720823798627	0.00653509261770666	0.00497342403506253	765	tags=60%, list=28%, signal=44%	ENSG00000188191/ENSG00000165802/ENSG00000052126/ENSG00000135124/ENSG00000204314/ENSG00000008735/ENSG00000185920/ENSG00000161835/ENSG00000205363/ENSG00000151067/ENSG00000103319/ENSG00000130787/ENSG00000164850/ENSG00000185345/ENSG00000109846/ENSG00000128482/ENSG00000163485/ENSG00000133083/ENSG00000149970/ENSG00000101463/ENSG00000099864/ENSG00000099957/ENSG00000196338/ENSG00000120899/ENSG00000171385
GO:0032279	CC	GO:0032279	asymmetric synapse	41	-0.41539172415587	-1.93265727340049	0.000568181818181818	0.00653509261770666	0.00497342403506253	745	tags=59%, list=27%, signal=43%	ENSG00000165802/ENSG00000052126/ENSG00000135124/ENSG00000204314/ENSG00000008735/ENSG00000185920/ENSG00000161835/ENSG00000205363/ENSG00000151067/ENSG00000103319/ENSG00000130787/ENSG00000164850/ENSG00000185345/ENSG00000109846/ENSG00000128482/ENSG00000163485/ENSG00000133083/ENSG00000149970/ENSG00000101463/ENSG00000099864/ENSG00000099957/ENSG00000196338/ENSG00000120899/ENSG00000171385
GO:0031401	BP	GO:0031401	positive regulation of protein modification process	187	0.37638898103464	1.59677894756486	0.000616269515201315	0.0070117775951794	0.00533619724468663	514	tags=29%, list=19%, signal=25%	ENSG00000023445/ENSG00000271503/ENSG00000124882/ENSG00000125538/ENSG00000112742/ENSG00000138778/ENSG00000175063/ENSG00000117399/ENSG00000183856/ENSG00000118193/ENSG00000163235/ENSG00000145777/ENSG00000118513/ENSG00000088325/ENSG00000092853/ENSG00000113494/ENSG00000166851/ENSG00000113070/ENSG00000134057/ENSG00000184661/ENSG00000140525/ENSG00000128342/ENSG00000012048/ENSG00000164400/ENSG00000094804…
GO:0031109	BP	GO:0031109	microtubule polymerization or depolymerization	31	0.579970367502773	1.9180423450825	0.000627825213460573	0.00711689688468959	0.00541619653950644	463	tags=45%, list=17%, signal=38%	ENSG00000154839/ENSG00000121621/ENSG00000186185/ENSG00000142945/ENSG00000165480/ENSG00000088325/ENSG00000136108/ENSG00000186638/ENSG00000117632/ENSG00000134222/ENSG00000112029/ENSG00000151849/ENSG00000139350/ENSG00000204899
GO:0060079	BP	GO:0060079	excitatory postsynaptic potential	13	-0.671257462935081	-2.20290585551852	0.000664010624169987	0.00746449988822689	0.00568073405007947	712	tags=85%, list=26%, signal=63%	ENSG00000135124/ENSG00000079841/ENSG00000008735/ENSG00000081189/ENSG00000104936/ENSG00000149582/ENSG00000163485/ENSG00000099957/ENSG00000196338/ENSG00000120899/ENSG00000089041
GO:0045444	BP	GO:0045444	fat cell differentiation	50	-0.410285505094184	-2.01123986285982	0.00066577896138482	0.00746449988822689	0.00568073405007947	571	tags=50%, list=21%, signal=40%	ENSG00000132170/ENSG00000140044/ENSG00000154153/ENSG00000175197/ENSG00000164850/ENSG00000136826/ENSG00000114315/ENSG00000148737/ENSG00000163624/ENSG00000172201/ENSG00000072310/ENSG00000116741/ENSG00000150907/ENSG00000204103/ENSG00000101384/ENSG00000137193/ENSG00000152518/ENSG00000071575/ENSG00000128016/ENSG00000221869/ENSG00000145287/ENSG00000121769/ENSG00000109819/ENSG00000139304/ENSG00000099953
GO:0045171	CC	GO:0045171	intercellular bridge	22	0.634909201881555	1.94982794753133	0.000663393923311662	0.00746449988822689	0.00568073405007947	249	tags=36%, list=9%, signal=33%	ENSG00000101447/ENSG00000138180/ENSG00000138182/ENSG00000134690/ENSG00000198901/ENSG00000088325/ENSG00000112984/ENSG00000094804
GO:0048232	BP	GO:0048232	male gamete generation	67	0.481712188655573	1.83364245048269	0.000678042716691152	0.00757435354790988	0.00576433635893224	628	tags=45%, list=23%, signal=35%	ENSG00000023445/ENSG00000121621/ENSG00000066279/ENSG00000122574/ENSG00000137812/ENSG00000073282/ENSG00000158402/ENSG00000185697/ENSG00000136492/ENSG00000164611/ENSG00000100206/ENSG00000105011/ENSG00000071539/ENSG00000187741/ENSG00000161800/ENSG00000180616/ENSG00000125885/ENSG00000101412/ENSG00000188486/ENSG00000139618/ENSG00000138587/ENSG00000164104/ENSG00000047936/ENSG00000143452/ENSG00000125319…
GO:0000307	CC	GO:0000307	cyclin-dependent protein kinase holoenzyme complex	17	0.670593694518146	1.94311942233305	0.00068465014377653	0.00761431699799604	0.00579474988094476	701	tags=76%, list=25%, signal=57%	ENSG00000170312/ENSG00000157456/ENSG00000134057/ENSG00000145386/ENSG00000175305/ENSG00000162063/ENSG00000123975/ENSG00000129355/ENSG00000173207/ENSG00000123374/ENSG00000105810/ENSG00000132646/ENSG00000135083
GO:0050867	BP	GO:0050867	positive regulation of cell activation	62	0.485802480457142	1.82759818160701	0.000686577411603158	0.00761431699799604	0.00579474988094476	592	tags=45%, list=22%, signal=36%	ENSG00000271503/ENSG00000125538/ENSG00000108691/ENSG00000168685/ENSG00000118113/ENSG00000145777/ENSG00000118513/ENSG00000112149/ENSG00000184599/ENSG00000197646/ENSG00000120217/ENSG00000112299/ENSG00000104951/ENSG00000185245/ENSG00000004468/ENSG00000134470/ENSG00000114251/ENSG00000104998/ENSG00000109685/ENSG00000124508/ENSG00000136244/ENSG00000162692/ENSG00000176208/ENSG00000164136/ENSG00000104312…
GO:0006936	BP	GO:0006936	muscle contraction	53	-0.422379343717557	-2.09367312573106	0.000691085003455425	0.00763673787991031	0.00581181292190268	578	tags=55%, list=21%, signal=44%	ENSG00000152661/ENSG00000213366/ENSG00000113163/ENSG00000151067/ENSG00000131730/ENSG00000104936/ENSG00000164850/ENSG00000130821/ENSG00000109846/ENSG00000152049/ENSG00000196839/ENSG00000274286/ENSG00000075073/ENSG00000116741/ENSG00000144681/ENSG00000148180/ENSG00000163485/ENSG00000101400/ENSG00000099957/ENSG00000046604/ENSG00000196562/ENSG00000158022/ENSG00000064989/ENSG00000184160/ENSG00000135914…
GO:0045840	BP	GO:0045840	positive regulation of mitotic nuclear division	13	0.721957720686235	1.94858735269448	0.000715307582260372	0.00787607488424324	0.00599395638634328	307	tags=62%, list=11%, signal=55%	ENSG00000124882/ENSG00000125538/ENSG00000137804/ENSG00000126787/ENSG00000163235/ENSG00000087586/ENSG00000135476/ENSG00000167513
GO:0031261	CC	GO:0031261	DNA replication preinitiation complex	11	0.751275464691496	1.93884896999995	0.000732600732600733	0.00798067181045904	0.00607355814522668	590	tags=91%, list=21%, signal=72%	ENSG00000093009/ENSG00000131153/ENSG00000147536/ENSG00000101003/ENSG00000100297/ENSG00000181938/ENSG00000073111/ENSG00000104738/ENSG00000112118/ENSG00000166508
GO:0071162	CC	GO:0071162	CMG complex	11	0.751275464691496	1.93884896999995	0.000732600732600733	0.00798067181045904	0.00607355814522668	590	tags=91%, list=21%, signal=72%	ENSG00000093009/ENSG00000131153/ENSG00000147536/ENSG00000101003/ENSG00000100297/ENSG00000181938/ENSG00000073111/ENSG00000104738/ENSG00000112118/ENSG00000166508
GO:1902969	BP	GO:1902969	mitotic DNA replication	11	0.750558624626504	1.93699898995004	0.000732600732600733	0.00798067181045904	0.00607355814522668	580	tags=91%, list=21%, signal=72%	ENSG00000093009/ENSG00000101003/ENSG00000139618/ENSG00000181938/ENSG00000051180/ENSG00000105486/ENSG00000073111/ENSG00000101868/ENSG00000104738/ENSG00000112118
GO:0010506	BP	GO:0010506	regulation of autophagy	59	-0.355608442159956	-1.806228748397	0.000752445447705041	0.0081678883934625	0.00621603622597321	654	tags=41%, list=24%, signal=32%	ENSG00000186815/ENSG00000006025/ENSG00000178996/ENSG00000164938/ENSG00000149212/ENSG00000025039/ENSG00000064601/ENSG00000163820/ENSG00000152137/ENSG00000168502/ENSG00000175197/ENSG00000185345/ENSG00000141458/ENSG00000106100/ENSG00000083750/ENSG00000179046/ENSG00000072310/ENSG00000150907/ENSG00000196730/ENSG00000166289/ENSG00000186868/ENSG00000135914/ENSG00000165507/ENSG00000104081
GO:0004672	MF	GO:0004672	protein kinase activity	92	0.442628525951143	1.75788951525779	0.000759795940518832	0.00821863777913328	0.00625465820567949	313	tags=25%, list=11%, signal=23%	ENSG00000271503/ENSG00000117650/ENSG00000170312/ENSG00000112742/ENSG00000108691/ENSG00000156970/ENSG00000163673/ENSG00000169679/ENSG00000178999/ENSG00000168078/ENSG00000060140/ENSG00000087586/ENSG00000134070/ENSG00000142731/ENSG00000166851/ENSG00000127564/ENSG00000122966/ENSG00000177602/ENSG00000165304/ENSG00000163545/ENSG00000118257/ENSG00000154928/ENSG00000120539
GO:0042391	BP	GO:0042391	regulation of membrane potential	60	-0.397670032792334	-2.02348898989687	0.000766871165644172	0.00826606393283823	0.00629075109472098	595	tags=45%, list=22%, signal=36%	ENSG00000008735/ENSG00000152661/ENSG00000205363/ENSG00000151067/ENSG00000081189/ENSG00000104936/ENSG00000164850/ENSG00000185345/ENSG00000250479/ENSG00000114923/ENSG00000022267/ENSG00000152049/ENSG00000149582/ENSG00000163485/ENSG00000124249/ENSG00000101400/ENSG00000186868/ENSG00000099957/ENSG00000046604/ENSG00000167103/ENSG00000196338/ENSG00000136531/ENSG00000120899/ENSG00000089041/ENSG00000169432…
GO:0071897	BP	GO:0071897	DNA biosynthetic process	56	0.491888334771286	1.81840012909324	0.000812724950655985	0.00872968898047268	0.00664358526097513	789	tags=54%, list=29%, signal=39%	ENSG00000117650/ENSG00000117724/ENSG00000178999/ENSG00000051341/ENSG00000143476/ENSG00000131153/ENSG00000167900/ENSG00000166803/ENSG00000147536/ENSG00000133119/ENSG00000101003/ENSG00000127586/ENSG00000181938/ENSG00000176890/ENSG00000100479/ENSG00000129355/ENSG00000183814/ENSG00000125319/ENSG00000049541/ENSG00000163918/ENSG00000105486/ENSG00000101868/ENSG00000111445/ENSG00000062822/ENSG00000141499…
GO:0050792	BP	GO:0050792	regulation of viral process	39	0.528394655374696	1.82841460962337	0.000855327468230694	0.00915528216865746	0.00696747591028928	478	tags=41%, list=17%, signal=34%	ENSG00000271503/ENSG00000169429/ENSG00000179750/ENSG00000131747/ENSG00000111331/ENSG00000135114/ENSG00000115267/ENSG00000149948/ENSG00000157601/ENSG00000134321/ENSG00000182481/ENSG00000145901/ENSG00000166801/ENSG00000172183/ENSG00000185745/ENSG00000111335
GO:0010212	BP	GO:0010212	response to ionizing radiation	38	0.53886734091507	1.85672352779775	0.000859106529209622	0.00916380297823597	0.00697396053133981	650	tags=47%, list=24%, signal=37%	ENSG00000169245/ENSG00000197299/ENSG00000111247/ENSG00000085999/ENSG00000138376/ENSG00000012048/ENSG00000144554/ENSG00000196584/ENSG00000114346/ENSG00000149948/ENSG00000188486/ENSG00000139618/ENSG00000051180/ENSG00000162692/ENSG00000132436/ENSG00000112096/ENSG00000168411/ENSG00000186280
GO:2000241	BP	GO:2000241	regulation of reproductive process	34	0.563006572883519	1.8977731883278	0.000870863398855437	0.00925706699406194	0.00704493756641022	561	tags=53%, list=20%, signal=43%	ENSG00000066279/ENSG00000112742/ENSG00000117399/ENSG00000158402/ENSG00000156509/ENSG00000087586/ENSG00000111247/ENSG00000071539/ENSG00000128342/ENSG00000164045/ENSG00000122641/ENSG00000112029/ENSG00000114251/ENSG00000167034/ENSG00000143452/ENSG00000181773/ENSG00000102265/ENSG00000108854
GO:0000727	BP	GO:0000727	double-strand break repair via break-induced replication	10	0.745531579187168	1.87618541574452	0.000887180245453201	0.00939799211735253	0.00715218629819078	590	tags=90%, list=21%, signal=71%	ENSG00000093009/ENSG00000131153/ENSG00000147536/ENSG00000100297/ENSG00000073111/ENSG00000097046/ENSG00000104738/ENSG00000112118/ENSG00000166508
GO:0003012	BP	GO:0003012	muscle system process	72	-0.358788112162602	-1.89842592815518	0.000919117647058824	0.00970285021224985	0.00738419350377156	578	tags=49%, list=21%, signal=39%	ENSG00000152661/ENSG00000213366/ENSG00000113163/ENSG00000132170/ENSG00000151067/ENSG00000172399/ENSG00000131730/ENSG00000104936/ENSG00000164850/ENSG00000130821/ENSG00000164867/ENSG00000109846/ENSG00000156804/ENSG00000152049/ENSG00000196839/ENSG00000274286/ENSG00000075073/ENSG00000116741/ENSG00000150907/ENSG00000144681/ENSG00000148180/ENSG00000163485/ENSG00000101400/ENSG00000163884/ENSG00000099957…
GO:0008092	MF	GO:0008092	cytoskeletal protein binding	179	0.375746120628915	1.58828451723544	0.00092630712227254	0.00974525849185357	0.00741646762280934	286	tags=21%, list=10%, signal=20%	ENSG00000154839/ENSG00000121621/ENSG00000138778/ENSG00000117724/ENSG00000186185/ENSG00000137804/ENSG00000122574/ENSG00000126787/ENSG00000076382/ENSG00000152503/ENSG00000075218/ENSG00000011426/ENSG00000142945/ENSG00000183856/ENSG00000118193/ENSG00000178882/ENSG00000237649/ENSG00000101447/ENSG00000090889/ENSG00000163808/ENSG00000138182/ENSG00000138160/ENSG00000137807/ENSG00000198901/ENSG00000089685…
GO:0051293	BP	GO:0051293	establishment of spindle localization	16	0.670488649372424	1.9098552944251	0.000971952235490142	0.01016684951772	0.00773731249275498	232	tags=44%, list=8%, signal=40%	ENSG00000137804/ENSG00000115163/ENSG00000080986/ENSG00000186193/ENSG00000135476/ENSG00000166851/ENSG00000164109
GO:1903039	BP	GO:1903039	positive regulation of leukocyte cell-cell adhesion	40	0.521985294817857	1.81700760512906	0.000972999270250547	0.01016684951772	0.00773731249275498	676	tags=52%, list=25%, signal=40%	ENSG00000271503/ENSG00000125538/ENSG00000108691/ENSG00000168685/ENSG00000118513/ENSG00000112149/ENSG00000197646/ENSG00000170961/ENSG00000120217/ENSG00000112299/ENSG00000104951/ENSG00000104998/ENSG00000124508/ENSG00000136244/ENSG00000162692/ENSG00000164136/ENSG00000104312/ENSG00000198805/ENSG00000117586/ENSG00000110944/ENSG00000125726
GO:0002250	BP	GO:0002250	adaptive immune response	72	0.459109251586741	1.76412194434743	0.00100964774512004	0.0105140266881653	0.00800152593010384	750	tags=56%, list=27%, signal=42%	ENSG00000211625/ENSG00000243466/ENSG00000125538/ENSG00000118503/ENSG00000240671/ENSG00000168685/ENSG00000174371/ENSG00000197646/ENSG00000077150/ENSG00000120217/ENSG00000211598/ENSG00000104856/ENSG00000104951/ENSG00000134321/ENSG00000163131/ENSG00000090339/ENSG00000104998/ENSG00000109685/ENSG00000136244/ENSG00000127191/ENSG00000176208/ENSG00000104312/ENSG00000125347/ENSG00000171608/ENSG00000168394…
GO:0060326	BP	GO:0060326	cell chemotaxis	67	0.464604979730602	1.76852368198806	0.00101706407503673	0.0105554758057866	0.00803307009479577	695	tags=49%, list=25%, signal=38%	ENSG00000169245/ENSG00000169248/ENSG00000271503/ENSG00000138755/ENSG00000169429/ENSG00000125538/ENSG00000124875/ENSG00000108691/ENSG00000158714/ENSG00000113070/ENSG00000108688/ENSG00000108702/ENSG00000151490/ENSG00000150630/ENSG00000154928/ENSG00000163734/ENSG00000106366/ENSG00000164104/ENSG00000163737/ENSG00000123610/ENSG00000114251/ENSG00000136244/ENSG00000162692/ENSG00000128052/ENSG00000115009…
GO:0051781	BP	GO:0051781	positive regulation of cell division	25	0.608580347853859	1.92713453445716	0.00103385887826312	0.0106936514276912	0.00813822636407012	302	tags=48%, list=11%, signal=43%	ENSG00000124882/ENSG00000125538/ENSG00000178999/ENSG00000118193/ENSG00000138182/ENSG00000163235/ENSG00000137807/ENSG00000122966/ENSG00000161800/ENSG00000094804/ENSG00000150630/ENSG00000114346
GO:0000792	CC	GO:0000792	heterochromatin	23	0.622191431388371	1.93316480165822	0.0010487676979549	0.0108114576111324	0.00822788080945899	650	tags=61%, list=24%, signal=47%	ENSG00000171320/ENSG00000115163/ENSG00000154920/ENSG00000119969/ENSG00000092470/ENSG00000106462/ENSG00000149948/ENSG00000276043/ENSG00000149503/ENSG00000101945/ENSG00000164032/ENSG00000151503/ENSG00000130816/ENSG00000186280
[truncated: 207 more rows]
