# Supplementary material for: Effect of Inflammatory Microenvironment on the Regenerative Capacity of Adipose-Derived Mesenchymal Stem Cells
Source: Cells. 2023 Jul 29;12(15):1966. doi: 10.3390/cells12151966 (PMC10416993; doi:10.3390/cells12151966)
Supplement: Supplementary file 1 [file cells-12-01966-s001.zip › supplementary table S2.xlsx]

## Sheet: gsea_KEGG
ID	Description	setSize_LPS	enrichmentScore_LPS	NES_LPS	pvalue_LPS	p.adjust_LPS	qvalues_LPS	rank_LPS	leading_edge_LPS	core_enrichment_LPS	setSize_TNFA	enrichmentScore_TNFA	NES_TNFA	pvalue_TNFA	p.adjust_TNFA	qvalues_TNFA	rank_TNFA	leading_edge_TNFA	core_enrichment_TNFA
hsa01100	Metabolic pathways	156	-0.309806	-1.83707	2.12853e-05	0.000400164	0.000304716	538	tags=54%, list=35%, signal=39%	2799/4524/10402/65985/3074/56901/22933/31/39/2593/3707/25796/56994/155066/115024/1718/2720/128/51301/51478/5236/10901/9296/112483/9167/5287/2987/134147/9215/5092/374875/6303/23175/5208/4758/2629/427/3422/3073/3417/11145/55902/4846/4259/4598/197257/6999/2026/645/119548/2879/1717/54988/5833/6307/526/1040/2272/8869/4597/1160/4881/4047/2194/51005/122481/3157/9415/10007/230/3992/54/2878/443/5837/91373…
hsa03010	Ribosome	29	-0.526868	-2.19197	0.000277982	0.00353544	0.00269216	752	tags=100%, list=48%, signal=53%	6142/6141/4736/6202/6175/6156/9045/6209/6205/6130/6122/6138/6159/6181/6193/7311/6223/6228/6208/6187/6137/64981/6125/6134/6158/6235/6234/6232
hsa03030	DNA replication	20	0.633235	2.01984	0.000539342	0.00506981	0.00386055	546	tags=95%, list=35%, signal=62%	5557/4174/5983/10535/1763/23649/5422/5424/5427/3978/4172/5984/4171/4176/5426/4173/5985/5982/2237	25	0.658674	2.09334	2.80254e-05	0.000924838	0.00072276	936	tags=100%, list=35%, signal=66%	5557/5983/4174/10535/23649/2237/5427/1763/5982/5984/3978/4171/5422/5985/4173/5424/4172/4176/5111/5426/6119/10714/4175/6118/5558
hsa03320	PPAR signaling pathway	10	-0.846801	-2.46898	1.71119e-06	4.02129e-05	3.06212e-05	122	tags=80%, list=8%, signal=74%	3157/9415/5468/10062/948/123/6319/2170
hsa03420	Nucleotide excision repair										12	0.668904	1.75093	0.00637262	0.04853	0.0379261	900	tags=100%, list=33%, signal=67%	5983/5427/5982/5984/3978/5985/5424/5111/5426/6119/10714/6118
hsa03440	Homologous recombination	12	0.735413	2.08427	0.000305514	0.00353544	0.00269216	307	tags=83%, list=20%, signal=67%	146956/83990/641/8438/672/7516/580/675/5888/5424	18	0.62497	1.80951	0.00151264	0.0136137	0.0106391	942	tags=89%, list=35%, signal=58%	83990/641/8438/146956/580/672/7516/675/5888/5424/4683/6119/10714/6118/5932/11073
hsa03460	Fanconi anemia pathway	19	0.675075	2.13292	8.89622e-05	0.00139374	0.0010613	468	tags=89%, list=30%, signal=63%	146956/83990/641/2175/672/55215/2177/675/2187/29089/57697/5888/7398/84464/80010/116028/2189	24	0.598897	1.88981	0.000960971	0.0108081	0.00844653	668	tags=62%, list=25%, signal=47%	83990/641/146956/55215/2175/672/2177/29089/675/2187/5888/116028/2189/7398/57697
hsa04022	cGMP-PKG signaling pathway										26	-0.47552	-2.00924	0.00209498	0.0172836	0.0135071	505	tags=50%, list=19%, signal=41%	775/8660/4208/4846/151/5997/109/134/5139/152/4881/489/10335
hsa04060	Cytokine-cytokine receptor interaction										59	0.5915	2.19817	5.89968e-07	3.89379e-05	3.04299e-05	678	tags=68%, list=25%, signal=52%	3627/6373/6352/4283/3576/3553/6372/6347/9235/3575/3604/85480/5618/3976/6354/6346/1437/9966/2921/3601/3624/943/3557/650/5196/9466/3455/3569/4803/3600/6364/90865/3589/7292/3454/146433/2920/51561/970/6376
hsa04061	Viral protein interaction with cytokine and cytokine receptor										23	0.626976	1.96467	0.000511762	0.00779453	0.00609142	429	tags=52%, list=16%, signal=44%	3627/6373/6352/4283/3576/6372/6347/6354/6346/2921/5196/3569
hsa04062	Chemokine signaling pathway										32	0.552293	1.85306	0.00130465	0.012301	0.0096132	678	tags=59%, list=25%, signal=45%	3627/6373/6352/4283/3576/6372/6347/6354/6346/4792/2921/5196/6364/5293/196883/4793/2920/4790/6376
hsa04064	NF-kappa B signaling pathway										24	0.656769	2.07242	4.06007e-05	0.00100487	0.000785303	480	tags=58%, list=18%, signal=48%	330/3576/3553/7128/4791/7185/23586/5971/4792/2921/3383/7186/329/7412
hsa04110	Cell cycle	47	0.613855	2.40824	6.72687e-08	3.16163e-06	2.40751e-06	286	tags=57%, list=18%, signal=48%	7272/983/701/9700/699/991/995/8318/9088/890/9133/5347/4085/990/1870/4174/9232/4998/1869/9134/891/1031/23594/5933/993/1017/8317	53	0.627745	2.29688	6.96124e-08	1.37832e-05	1.07716e-05	596	tags=64%, list=22%, signal=51%	983/7272/701/699/991/995/8318/9700/9133/5347/9232/9088/891/890/1870/9134/4085/4998/990/993/23594/1869/4174/1031/10926/5933/1032/1017/4171/8317/4173/4172/4176/1021
hsa04114	Oocyte meiosis	24	0.731231	2.43343	5.60971e-08	3.16163e-06	2.40751e-06	234	tags=67%, list=15%, signal=58%	983/151648/286151/9700/699/991/995/9088/6790/9133/5347/4085/9232/9134/891/26271	34	0.671482	2.2903	3.20774e-07	3.17567e-05	2.48178e-05	226	tags=44%, list=8%, signal=41%	983/151648/699/991/995/286151/6790/9700/9133/5347/9232/9088/891/9134/4085
hsa04115	p53 signaling pathway	14	0.644273	1.89651	0.00274408	0.0198418	0.0151091	284	tags=57%, list=18%, signal=47%	983/6241/51512/5054/9133/9134/891/1017	24	0.58605	1.84927	0.00164352	0.0141486	0.0110571	473	tags=46%, list=18%, signal=38%	6241/983/51512/9133/891/3732/9134/5054/5366/1017/637
hsa04140	Autophagy - animal	19	-0.503095	-1.81835	0.00979738	0.0484712	0.0369098	363	tags=53%, list=23%, signal=41%	1509/3476/55062/8660/58476/8878/64121/10325/1514/58528
hsa04142	Lysosome	37	-0.448448	-1.93854	0.00117367	0.00919375	0.00700084	654	tags=78%, list=42%, signal=47%	4126/5660/51172/1777/3920/2799/3482/3074/22901/2720/3916/23659/1497/3988/4758/1509/9516/2629/427/3073/26503/5476/2760/10577/1200/4864/1514/54/1513
hsa04218	Cellular senescence	30	0.509648	1.78319	0.00326624	0.0219305	0.0166996	284	tags=47%, list=18%, signal=39%	983/4605/5054/890/9133/1870/1869/9134/891/5933/4773/286826/993/1017
hsa04620	Toll-like receptor signaling pathway										26	0.592516	1.90373	0.00105062	0.0108081	0.00844653	17	tags=23%, list=1%, signal=23%	3627/6373/6352/4283/3576/3553
hsa04621	NOD-like receptor signaling pathway										38	0.620115	2.13795	3.04401e-06	0.000150678	0.000117755	659	tags=66%, list=24%, signal=50%	330/6352/3576/3553/6347/7128/115362/115361/4940/4792/2921/2633/3455/3569/7186/2635/4939/329/8767/3454/3665/4793/2920/4790/4938
hsa04622	RIG-I-like receptor signaling pathway										16	0.618124	1.75466	0.0070524	0.0499501	0.039036	710	tags=62%, list=26%, signal=46%	3627/3576/23586/64135/4792/7186/3665/4793/4790/1540
hsa04623	Cytosolic DNA-sensing pathway										15	0.684338	1.91798	0.000745942	0.00923104	0.00721405	652	tags=73%, list=24%, signal=56%	3627/6352/3553/23586/4792/3569/115004/90865/3665/4793/4790
hsa04657	IL-17 signaling pathway										25	0.640515	2.03563	7.30439e-05	0.00144717	0.00113097	509	tags=56%, list=19%, signal=46%	3627/3576/3553/6372/6347/7128/6354/1437/4792/2921/3569/7186/8061/6364
hsa04668	TNF signaling pathway										44	0.564806	1.9898	3.70696e-05	0.00100487	0.000785303	531	tags=50%, list=20%, signal=41%	3627/330/6352/3553/6372/6347/7128/7185/3976/1437/7424/4792/2921/3383/3569/7186/329/7412/3600/6364/3659/5293
hsa04910	Insulin signaling pathway	14	-0.577619	-1.88355	0.00957264	0.0484712	0.0369098	504	tags=93%, list=32%, signal=63%	5836/53358/31/868/6720/2308/8660/23433/25759/2194/79660/5837/10891	29	-0.496693	-2.08834	0.000283705	0.00468114	0.00365831	535	tags=52%, list=20%, signal=42%	31/8660/5260/10211/10580/2872/53358/399694/2194/5836/6720/79660/2308/5837/10891
hsa04914	Progesterone-mediated oocyte maturation	15	0.784927	2.35777	5.49811e-07	1.72274e-05	1.31183e-05	284	tags=87%, list=18%, signal=72%	983/699/995/9088/890/6790/9133/5347/4085/3835/891/993/1017	24	0.686278	2.16554	6.71253e-06	0.000265816	0.000207735	246	tags=50%, list=9%, signal=46%	983/699/995/6790/9133/5347/9088/891/890/4085/3835/993
hsa04931	Insulin resistance	12	-0.700094	-2.15125	0.000338499	0.00353544	0.00269216	423	tags=92%, list=27%, signal=67%	6720/2308/133522/8660/4846/11000/10062/79660/948/5837/10891
hsa04936	Alcoholic liver disease	13	-0.572752	-1.81516	0.00636222	0.0398699	0.0303601	504	tags=85%, list=32%, signal=58%	31/128/6720/23175/2308/3654/51176/5608/2194/10891/6319
hsa05131	Shigellosis	16	-0.545089	-1.85948	0.00788524	0.0463258	0.0352761	368	tags=56%, list=24%, signal=43%	2308/3554/55062/23157/8878/29108/64121/10325/58528
hsa05134	Legionellosis										12	0.692056	1.81153	0.00285093	0.0225794	0.0176458	652	tags=75%, list=24%, signal=57%	3576/3553/4791/7097/4792/2921/3569/2920/4790
hsa05160	Hepatitis C										43	0.543647	1.91582	0.000240543	0.00432978	0.00338372	659	tags=53%, list=24%, signal=41%	3627/9076/23562/4940/1870/23586/1869/4792/4599/91543/3455/7186/3434/1017/4939/637/5293/3454/1021/3665/5519/4790/4938
hsa05162	Measles										38	0.529328	1.82494	0.00107892	0.0108081	0.00844653	659	tags=55%, list=24%, signal=42%	3553/7128/4940/9134/23586/64135/7097/4792/4599/3455/3569/1017/4939/637/5293/3454/1021/3665/4793/4790/4938
hsa05164	Influenza A										48	0.552415	1.9857	7.30896e-05	0.00144717	0.00113097	688	tags=54%, list=26%, signal=41%	3627/6352/3576/3553/6347/4940/23586/64135/4792/4599/91543/3838/3383/3455/3569/4939/637/5293/90865/3454/1021/3665/4793/4790/4938/5611
hsa05168	Herpes simplex virus 1 infection										78	0.44648	1.72241	0.00109173	0.0108081	0.00844653	855	tags=51%, list=32%, signal=36%	330/6352/3553/6347/4940/23586/64135/5452/7097/4792/10308/81931/3455/100129543/3569/7186/115004/148206/4939/329/637/51427/93474/7639/5293/6890/163227/3454/3665/4790/4938/6732/6891/8503/90576/54205/355/348327/7594/9641
hsa05169	Epstein-Barr virus infection										63	0.483643	1.80856	0.000638283	0.00902715	0.00705471	659	tags=46%, list=24%, signal=36%	3627/7128/4940/890/4794/4791/1870/9134/23586/5971/1869/7097/4792/3383/3455/3569/7186/1017/4939/637/5293/6890/965/3454/1021/3665/4793/4790/4938
hsa05171	Coronavirus disease - COVID-19	31	-0.489349	-2.04814	0.00114416	0.00919375	0.00700084	752	tags=97%, list=48%, signal=51%	6135/6142/6141/4736/6202/6175/6156/9045/6209/6205/6130/6122/6138/6159/6181/6193/7311/6223/6228/6208/6187/6137/6125/6134/6158/6235/3654/6234/6232/185	45	0.519024	1.84079	0.000707344	0.00923104	0.00721405	659	tags=47%, list=24%, signal=36%	3627/3576/3553/6347/4940/1839/23586/1437/64135/7097/4792/4599/3455/3569/115004/4939/5293/3454/4793/4790/4938
hsa05323	Rheumatoid arthritis	11	-0.597648	-1.812	0.00933207	0.0484712	0.0369098	199	tags=55%, list=13%, signal=48%	526/7043/1514/54/1513/3127	22	0.561939	1.73724	0.00706365	0.0499501	0.039036	644	tags=68%, list=24%, signal=52%	6352/3576/3553/6372/6347/1437/7097/2921/3383/3569/3600/6364/3589/2920/51561
