# Supplementary material for: Effect of Inflammatory Microenvironment on the Regenerative Capacity of Adipose-Derived Mesenchymal Stem Cells
Source: Cells. 2023 Jul 29;12(15):1966. doi: 10.3390/cells12151966 (PMC10416993; doi:10.3390/cells12151966)
Supplement: Supplementary file 1 [file cells-12-01966-s001.zip › supplementary table S3.xlsx]

## Sheet: clustered_gsea_GO_terms_LPS
	go	cluster	parent	parentSimScore	score	size	term	parentTerm
GO:0007051	GO:0007051	1	GO:0007051	0.998	2.83604552429109	22	spindle organization	spindle organization
GO:0032392	GO:0032392	1	GO:0007051	0.401	2.83604552429109	4	DNA geometric change	spindle organization
GO:0051656	GO:0051656	2	GO:0051656	0.996	2.83604552429109	3	establishment of organelle localization	establishment of organelle localization
GO:0061982	GO:0061982	3	GO:0061982	0.998	2.83604552429109	0	meiosis I cell cycle process	meiosis I cell cycle process
GO:0006260	GO:0006260	4	GO:0006260	0.997	2.83604552429109	102	DNA replication	DNA replication
GO:0051985	GO:0051985	5	GO:0051985	1	2.83604552429109	0	negative regulation of chromosome segregation	negative regulation of chromosome segregation
GO:0045786	GO:0045786	6	GO:0045786	0.996	2.83604552429109	53	negative regulation of cell cycle	negative regulation of cell cycle
GO:0007052	GO:0007052	1	GO:0007051	0.962	2.83604552429109	63	mitotic spindle organization	spindle organization
GO:0007080	GO:0007080	2	GO:0051656	0.83	2.83604552429109	47	mitotic metaphase plate congression	establishment of organelle localization
GO:2000816	GO:2000816	5	GO:0051985	0.996	2.83604552429109	3	negative regulation of mitotic sister chromatid separation	negative regulation of chromosome segregation
GO:0000086	GO:0000086	6	GO:0045786	0.588	2.83604552429109	62	G2/M transition of mitotic cell cycle	negative regulation of cell cycle
GO:0000070	GO:0000070	5	GO:0051985	0.772	2.83604552429109	36	mitotic sister chromatid segregation	negative regulation of chromosome segregation
GO:0051276	GO:0051276	1	GO:0007051	0.507	2.83604552429109	19	chromosome organization	spindle organization
GO:0006259	GO:0006259	4	GO:0006260	0.796	2.83604552429109	21	DNA metabolic process	DNA replication
GO:0033046	GO:0033046	5	GO:0051985	0.996	2.83604552429109	0	negative regulation of sister chromatid segregation	negative regulation of chromosome segregation
GO:0051321	GO:0051321	3	GO:0061982	0.939	2.83604552429109	72	meiotic cell cycle	meiosis I cell cycle process
GO:0030071	GO:0030071	5	GO:0051985	0.902	2.83604552429109	37	regulation of mitotic metaphase/anaphase transition	negative regulation of chromosome segregation
GO:0033048	GO:0033048	5	GO:0051985	0.996	2.83604552429109	0	negative regulation of mitotic sister chromatid segregation	negative regulation of chromosome segregation
GO:0007010	GO:0007010	1	GO:0007051	0.757	2.83604552429109	153	cytoskeleton organization	spindle organization
GO:0045787	GO:0045787	6	GO:0045786	0.768	2.83604552429109	35	positive regulation of cell cycle	negative regulation of cell cycle
GO:0007091	GO:0007091	5	GO:0051985	0.907	2.83604552429109	9	metaphase/anaphase transition of mitotic cell cycle	negative regulation of chromosome segregation
GO:1901988	GO:1901988	6	GO:0045786	0.961	2.83604552429109	1	negative regulation of cell cycle phase transition	negative regulation of cell cycle
GO:1901990	GO:1901990	6	GO:0045786	0.772	2.83604552429109	10	regulation of mitotic cell cycle phase transition	negative regulation of cell cycle
GO:2001251	GO:2001251	7	GO:2001251	0.999	2.83604552429109	1	negative regulation of chromosome organization	negative regulation of chromosome organization
GO:0045841	GO:0045841	5	GO:0051985	0.993	2.83604552429109	2	negative regulation of mitotic metaphase/anaphase transition	negative regulation of chromosome segregation
GO:0061640	GO:0061640	8	GO:0061640	0.999	2.83604552429109	23	cytoskeleton-dependent cytokinesis	cytoskeleton-dependent cytokinesis
GO:0032508	GO:0032508	1	GO:0007051	0.397	2.83604552429109	83	DNA duplex unwinding	spindle organization
GO:0050000	GO:0050000	2	GO:0051656	0.814	2.83604552429109	0	chromosome localization	establishment of organelle localization
GO:0051302	GO:0051302	8	GO:0061640	0.785	2.83604552429109	23	regulation of cell division	cytoskeleton-dependent cytokinesis
GO:0010564	GO:0010564	6	GO:0045786	0.839	2.83604552429109	15	regulation of cell cycle process	negative regulation of cell cycle
GO:0000819	GO:0000819	5	GO:0051985	0.784	2.83604552429109	3	sister chromatid segregation	negative regulation of chromosome segregation
GO:1905819	GO:1905819	5	GO:0051985	1	2.83604552429109	0	negative regulation of chromosome separation	negative regulation of chromosome segregation
GO:0070925	GO:0070925	1	GO:0007051	0.491	2.83604552429109	6	organelle assembly	spindle organization
GO:0032465	GO:0032465	8	GO:0061640	0.902	2.83604552429109	53	regulation of cytokinesis	cytoskeleton-dependent cytokinesis
GO:0065004	GO:0065004	9	GO:0065004	0.998	2.83604552429109	3	protein-DNA complex assembly	protein-DNA complex assembly
GO:0000725	GO:0000725	4	GO:0006260	0.633	2.83604552429109	6	recombinational repair	DNA replication
GO:0090307	GO:0090307	1	GO:0007051	0.914	2.83604552429109	51	mitotic spindle assembly	spindle organization
GO:0051301	GO:0051301	8	GO:0061640	0.868	2.83604552429109	353	cell division	cytoskeleton-dependent cytokinesis
GO:0098813	GO:0098813	5	GO:0051985	0.807	2.83604552429109	2	nuclear chromosome segregation	negative regulation of chromosome segregation
GO:0044784	GO:0044784	5	GO:0051985	0.909	2.83604552429109	0	metaphase/anaphase transition of cell cycle	negative regulation of chromosome segregation
GO:0045931	GO:0045931	6	GO:0045786	0.695	2.83604552429109	33	positive regulation of mitotic cell cycle	negative regulation of cell cycle
GO:0033043	GO:0033043	7	GO:2001251	0.766	2.83604552429109	2	regulation of organelle organization	negative regulation of chromosome organization
GO:0007093	GO:0007093	6	GO:0045786	0.911	2.83604552429109	4	mitotic cell cycle checkpoint signaling	negative regulation of cell cycle
GO:0045930	GO:0045930	6	GO:0045786	0.949	2.83604552429109	33	negative regulation of mitotic cell cycle	negative regulation of cell cycle
GO:0140014	GO:0140014	7	GO:2001251	0.423	2.83604552429109	6	mitotic nuclear division	negative regulation of chromosome organization
GO:0007127	GO:0007127	3	GO:0061982	0.99	2.83604552429109	7	meiosis I	meiosis I cell cycle process
GO:0000075	GO:0000075	6	GO:0045786	0.937	2.83604552429109	0	cell cycle checkpoint signaling	negative regulation of cell cycle
GO:0031577	GO:0031577	6	GO:0045786	0.834	2.83604552429109	0	spindle checkpoint signaling	negative regulation of cell cycle
GO:0051306	GO:0051306	5	GO:0051985	0.724	2.83604552429109	5	mitotic sister chromatid separation	negative regulation of chromosome segregation
GO:0006302	GO:0006302	10	GO:0006302	0.996	2.83604552429109	100	double-strand break repair	double-strand break repair
GO:0044772	GO:0044772	6	GO:0045786	0.658	2.83604552429109	24	mitotic cell cycle phase transition	negative regulation of cell cycle
GO:0033045	GO:0033045	5	GO:0051985	0.917	2.83604552429109	2	regulation of sister chromatid segregation	negative regulation of chromosome segregation
GO:0007292	GO:0007292	3	GO:0061982	0.593	2.83604552429109	19	female gamete generation	meiosis I cell cycle process
GO:1901991	GO:1901991	6	GO:0045786	0.928	2.83604552429109	4	negative regulation of mitotic cell cycle phase transition	negative regulation of cell cycle
GO:0045132	GO:0045132	3	GO:0061982	0.892	2.83604552429109	4	meiotic chromosome segregation	meiosis I cell cycle process
GO:0007059	GO:0007059	5	GO:0051985	0.819	2.83604552429109	93	chromosome segregation	negative regulation of chromosome segregation
GO:0048285	GO:0048285	7	GO:2001251	0.444	2.83604552429109	0	organelle fission	negative regulation of chromosome organization
GO:1901989	GO:1901989	6	GO:0045786	0.694	2.83604552429109	1	positive regulation of cell cycle phase transition	negative regulation of cell cycle
GO:0051304	GO:0051304	5	GO:0051985	0.739	2.83604552429109	4	chromosome separation	negative regulation of chromosome segregation
GO:0033044	GO:0033044	7	GO:2001251	0.912	2.83604552429109	19	regulation of chromosome organization	negative regulation of chromosome organization
GO:0007094	GO:0007094	6	GO:0045786	0.832	2.83604552429109	44	mitotic spindle assembly checkpoint signaling	negative regulation of cell cycle
GO:1905818	GO:1905818	5	GO:0051985	0.918	2.83604552429109	3	regulation of chromosome separation	negative regulation of chromosome segregation
GO:0000910	GO:0000910	8	GO:0061640	0.96	2.83604552429109	0	cytokinesis	cytoskeleton-dependent cytokinesis
GO:0000003	GO:0000003	3	GO:0061982	0.748	2.83604552429109	4	reproduction	meiosis I cell cycle process
GO:0051640	GO:0051640	2	GO:0051656	0.965	2.83604552429109	4	organelle localization	establishment of organelle localization
GO:0000724	GO:0000724	4	GO:0006260	0.631	2.83604552429109	148	double-strand break repair via homologous recombination	DNA replication
GO:0071173	GO:0071173	6	GO:0045786	0.833	2.83604552429109	0	spindle assembly checkpoint signaling	negative regulation of cell cycle
GO:0051784	GO:0051784	7	GO:2001251	0.8	2.83604552429109	0	negative regulation of nuclear division	negative regulation of chromosome organization
GO:0008608	GO:0008608	5	GO:0051985	0.686	2.83604552429109	19	attachment of spindle microtubules to kinetochore	negative regulation of chromosome segregation
GO:0071103	GO:0071103	1	GO:0007051	0.404	2.83604552429109	2	DNA conformation change	spindle organization
GO:1902100	GO:1902100	5	GO:0051985	0.875	2.83604552429109	0	negative regulation of metaphase/anaphase transition of cell cycle	negative regulation of chromosome segregation
GO:0022414	GO:0022414	3	GO:0061982	0.749	2.83604552429109	4	reproductive process	meiosis I cell cycle process
GO:0000281	GO:0000281	8	GO:0061640	0.973	2.83604552429109	76	mitotic cytokinesis	cytoskeleton-dependent cytokinesis
GO:1901992	GO:1901992	6	GO:0045786	0.68	2.83604552429109	3	positive regulation of mitotic cell cycle phase transition	negative regulation of cell cycle
GO:0051783	GO:0051783	7	GO:2001251	0.636	2.83604552429109	0	regulation of nuclear division	negative regulation of chromosome organization
GO:0051983	GO:0051983	5	GO:0051985	0.934	2.83604552429109	13	regulation of chromosome segregation	negative regulation of chromosome segregation
GO:0010948	GO:0010948	6	GO:0045786	0.974	2.83604552429109	2	negative regulation of cell cycle process	negative regulation of cell cycle
GO:0000226	GO:0000226	11	GO:0000226	0.991	2.83604552429109	151	microtubule cytoskeleton organization	microtubule cytoskeleton organization
GO:0031023	GO:0031023	11	GO:0000226	0.844	2.83604552429109	12	microtubule organizing center organization	microtubule cytoskeleton organization
GO:1902749	GO:1902749	6	GO:0045786	0.697	2.83604552429109	6	regulation of cell cycle G2/M phase transition	negative regulation of cell cycle
GO:0007346	GO:0007346	6	GO:0045786	0.8	2.83604552429109	65	regulation of mitotic cell cycle	negative regulation of cell cycle
GO:0000082	GO:0000082	6	GO:0045786	0.613	2.83604552429109	77	G1/S transition of mitotic cell cycle	negative regulation of cell cycle
GO:0007098	GO:0007098	11	GO:0000226	0.835	2.83604552429109	55	centrosome cycle	microtubule cytoskeleton organization
GO:0010389	GO:0010389	6	GO:0045786	0.69	2.83604552429109	11	regulation of G2/M transition of mitotic cell cycle	negative regulation of cell cycle
GO:0051303	GO:0051303	2	GO:0051656	0.863	2.83604552429109	3	establishment of chromosome localization	establishment of organelle localization
GO:0051310	GO:0051310	2	GO:0051656	0.847	2.83604552429109	17	metaphase plate congression	establishment of organelle localization
GO:0045839	GO:0045839	7	GO:2001251	0.793	2.83604552429109	9	negative regulation of mitotic nuclear division	negative regulation of chromosome organization
GO:0051052	GO:0051052	4	GO:0006260	0.711	2.83604552429109	0	regulation of DNA metabolic process	DNA replication
GO:1901987	GO:1901987	6	GO:0045786	0.794	2.83604552429109	3	regulation of cell cycle phase transition	negative regulation of cell cycle
GO:1902099	GO:1902099	5	GO:0051985	0.905	2.83604552429109	0	regulation of metaphase/anaphase transition of cell cycle	negative regulation of chromosome segregation
GO:0044843	GO:0044843	6	GO:0045786	0.619	2.83604552429109	2	cell cycle G1/S phase transition	negative regulation of cell cycle
GO:0022412	GO:0022412	3	GO:0061982	0.648	2.83604552429109	0	cellular process involved in reproduction in multicellular organism	meiosis I cell cycle process
GO:0071824	GO:0071824	9	GO:0065004	0.986	2.83604552429109	0	protein-DNA complex subunit organization	protein-DNA complex assembly
GO:0006275	GO:0006275	4	GO:0006260	0.907	2.83604552429109	46	regulation of DNA replication	DNA replication
GO:0071174	GO:0071174	6	GO:0045786	0.832	2.83604552429109	0	mitotic spindle checkpoint signaling	negative regulation of cell cycle
GO:0010965	GO:0010965	5	GO:0051985	0.911	2.83604552429109	1	regulation of mitotic sister chromatid separation	negative regulation of chromosome segregation
GO:0006974	GO:0006974	10	GO:0006302	0.856	2.83604552429109	307	cellular response to DNA damage stimulus	double-strand break repair
GO:0051225	GO:0051225	1	GO:0007051	0.952	2.83604552429109	46	spindle assembly	spindle organization
GO:0033047	GO:0033047	5	GO:0051985	0.883	2.83604552429109	0	regulation of mitotic sister chromatid segregation	negative regulation of chromosome segregation
GO:0090068	GO:0090068	6	GO:0045786	0.747	2.83604552429109	2	positive regulation of cell cycle process	negative regulation of cell cycle
GO:0044770	GO:0044770	6	GO:0045786	0.673	2.83604552429109	6	cell cycle phase transition	negative regulation of cell cycle
GO:1903047	GO:1903047	6	GO:0045786	0.703	2.83604552429109	0	mitotic cell cycle process	negative regulation of cell cycle
GO:0031570	GO:0031570	6	GO:0045786	0.901	2.83604552429109	0	DNA integrity checkpoint signaling	negative regulation of cell cycle
GO:0006310	GO:0006310	4	GO:0006260	0.679	2.83604552429109	61	DNA recombination	DNA replication
GO:0071459	GO:0071459	2	GO:0051656	0.461	2.83604552429109	7	protein localization to chromosome, centromeric region	establishment of organelle localization
GO:0007018	GO:0007018	11	GO:0000226	0.844	2.83604552429109	91	microtubule-based movement	microtubule cytoskeleton organization
GO:0044839	GO:0044839	6	GO:0045786	0.593	2.83604552429109	2	cell cycle G2/M phase transition	negative regulation of cell cycle
GO:0000280	GO:0000280	7	GO:2001251	0.44	2.83604552429109	0	nuclear division	negative regulation of chromosome organization
GO:0010639	GO:0010639	7	GO:2001251	0.906	2.83604552429109	0	negative regulation of organelle organization	negative regulation of chromosome organization
GO:0007088	GO:0007088	7	GO:2001251	0.626	2.83604552429109	27	regulation of mitotic nuclear division	negative regulation of chromosome organization
GO:0051726	GO:0051726	6	GO:0045786	0.876	2.83604552429109	259	regulation of cell cycle	negative regulation of cell cycle
GO:0034508	GO:0034508	9	GO:0065004	0.86	2.83604552429109	3	centromere complex assembly	protein-DNA complex assembly
GO:1903046	GO:1903046	3	GO:0061982	0.958	2.83604552429109	0	meiotic cell cycle process	meiosis I cell cycle process
GO:0032886	GO:0032886	11	GO:0000226	0.793	2.83604552429109	11	regulation of microtubule-based process	microtubule cytoskeleton organization
GO:0034502	GO:0034502	2	GO:0051656	0.501	2.83604552429109	3	protein localization to chromosome	establishment of organelle localization
GO:0006281	GO:0006281	10	GO:0006302	0.907	2.83604552429109	263	DNA repair	double-strand break repair
GO:0006261	GO:0006261	4	GO:0006260	0.955	2.83604552429109	32	DNA-templated DNA replication	DNA replication
GO:0140013	GO:0140013	3	GO:0061982	0.946	2.83604552429109	5	meiotic nuclear division	meiosis I cell cycle process
GO:0007017	GO:0007017	11	GO:0000226	0.94	2.83604552429109	17	microtubule-based process	microtubule cytoskeleton organization
GO:1902850	GO:1902850	1	GO:0007051	0.74	2.83604552429109	2	microtubule cytoskeleton organization involved in mitosis	spindle organization
GO:0030261	GO:0030261	1	GO:0007051	0.384	2.8338096778004	22	chromosome condensation	spindle organization
GO:0051445	GO:0051445	3	GO:0061982	0.809	2.83098068367699	20	regulation of meiotic cell cycle	meiosis I cell cycle process
GO:0051653	GO:0051653	2	GO:0051656	0.782	2.83098068367699	5	spindle localization	establishment of organelle localization
GO:1902808	GO:1902808	6	GO:0045786	0.66	2.83098068367699	16	positive regulation of cell cycle G1/S phase transition	negative regulation of cell cycle
GO:0007143	GO:0007143	3	GO:0061982	0.799	2.83098068367699	7	female meiotic nuclear division	meiosis I cell cycle process
GO:0032467	GO:0032467	8	GO:0061640	0.853	2.83087521376845	47	positive regulation of cytokinesis	cytoskeleton-dependent cytokinesis
GO:0006468	GO:0006468	12	GO:0006468	0.979	2.69351586990256	599	protein phosphorylation	protein phosphorylation
GO:0007276	GO:0007276	3	GO:0061982	0.68	2.64942743533246	20	gamete generation	meiosis I cell cycle process
GO:0051924	GO:0051924	13	GO:0051924	0.997	2.63833623549097	25	regulation of calcium ion transport	regulation of calcium ion transport
GO:0051054	GO:0051054	4	GO:0006260	0.663	2.63485649715908	2	positive regulation of DNA metabolic process	DNA replication
GO:1905954	GO:1905954	14	GO:1905954	0.999	2.63443295455481	0	positive regulation of lipid localization	positive regulation of lipid localization
GO:0006694	GO:0006694	15	GO:0006694	0.998	2.63443295455481	31	steroid biosynthetic process	steroid biosynthetic process
GO:0032368	GO:0032368	14	GO:1905954	0.931	2.63443295455481	4	regulation of lipid transport	positive regulation of lipid localization
GO:0007204	GO:0007204	16	GO:0007204	0.997	2.63443295455481	160	positive regulation of cytosolic calcium ion concentration	positive regulation of cytosolic calcium ion concentration
GO:0070588	GO:0070588	13	GO:0051924	0.9	2.63443295455481	140	calcium ion transmembrane transport	regulation of calcium ion transport
GO:0051480	GO:0051480	16	GO:0007204	0.983	2.63443295455481	48	regulation of cytosolic calcium ion concentration	positive regulation of cytosolic calcium ion concentration
GO:0045834	GO:0045834	15	GO:0006694	0.561	2.63443295455481	1	positive regulation of lipid metabolic process	steroid biosynthetic process
GO:0015850	GO:0015850	13	GO:0051924	0.378	2.63443295455481	0	organic hydroxy compound transport	regulation of calcium ion transport
GO:0071897	GO:0071897	4	GO:0006260	0.645	2.63443295455481	30	DNA biosynthetic process	DNA replication
GO:1902806	GO:1902806	6	GO:0045786	0.729	2.6293804418457	9	regulation of cell cycle G1/S phase transition	negative regulation of cell cycle
GO:0006816	GO:0006816	13	GO:0051924	0.931	2.6293804418457	85	calcium ion transport	regulation of calcium ion transport
GO:0000077	GO:0000077	6	GO:0045786	0.889	2.6293804418457	38	DNA damage checkpoint signaling	negative regulation of cell cycle
GO:1905952	GO:1905952	14	GO:1905954	0.955	2.62819521966761	0	regulation of lipid localization	positive regulation of lipid localization
GO:0070192	GO:0070192	3	GO:0061982	0.867	2.62740673823839	5	chromosome organization involved in meiotic cell cycle	meiosis I cell cycle process
GO:0007062	GO:0007062	5	GO:0051985	0.711	2.62740673823839	26	sister chromatid cohesion	negative regulation of chromosome segregation
GO:0044786	GO:0044786	4	GO:0006260	0.822	2.62740673823839	0	cell cycle DNA replication	DNA replication
GO:0044774	GO:0044774	6	GO:0045786	0.865	2.62740673823839	2	mitotic DNA integrity checkpoint signaling	negative regulation of cell cycle
GO:0023061	GO:0023061	13	GO:0051924	0.399	2.62420034493287	2	signal release	regulation of calcium ion transport
GO:0006270	GO:0006270	4	GO:0006260	0.83	2.62420034493287	30	DNA replication initiation	DNA replication
GO:0006874	GO:0006874	16	GO:0007204	0.953	2.62420034493287	128	cellular calcium ion homeostasis	positive regulation of cytosolic calcium ion concentration
GO:1903083	GO:1903083	2	GO:0051656	0.437	2.62420034493287	0	protein localization to condensed chromosome	establishment of organelle localization
GO:0072503	GO:0072503	16	GO:0007204	0.946	2.62420034493287	0	cellular divalent inorganic cation homeostasis	positive regulation of cytosolic calcium ion concentration
GO:0002377	GO:0002377	17	GO:0002377	0.998	2.62420034493287	94	immunoglobulin production	immunoglobulin production
GO:0034501	GO:0034501	2	GO:0051656	0.437	2.62420034493287	17	protein localization to kinetochore	establishment of organelle localization
GO:0006650	GO:0006650	12	GO:0006468	0.659	2.61891493239732	4	glycerophospholipid metabolic process	protein phosphorylation
GO:1902751	GO:1902751	6	GO:0045786	0.625	2.61891493239732	4	positive regulation of cell cycle G2/M phase transition	negative regulation of cell cycle
GO:0006875	GO:0006875	16	GO:0007204	0.929	2.59566054920609	6	cellular metal ion homeostasis	positive regulation of cytosolic calcium ion concentration
GO:0008202	GO:0008202	15	GO:0006694	0.931	2.59331149335353	58	steroid metabolic process	steroid biosynthetic process
GO:0046486	GO:0046486	15	GO:0006694	0.637	2.59331149335353	8	glycerolipid metabolic process	steroid biosynthetic process
GO:0051338	GO:0051338	18	GO:0051338	0.992	2.59233823017179	0	regulation of transferase activity	regulation of transferase activity
GO:0006869	GO:0006869	14	GO:1905954	0.821	2.58206822487972	72	lipid transport	positive regulation of lipid localization
GO:0006873	GO:0006873	16	GO:0007204	0.911	2.57654997748116	5	cellular ion homeostasis	positive regulation of cytosolic calcium ion concentration
GO:0006644	GO:0006644	12	GO:0006468	0.675	2.57654997748116	58	phospholipid metabolic process	protein phosphorylation
GO:0010876	GO:0010876	14	GO:1905954	0.831	2.55883134586611	3	lipid localization	positive regulation of lipid localization
GO:0055080	GO:0055080	16	GO:0007204	0.897	2.5570344782041	2	cation homeostasis	positive regulation of cytosolic calcium ion concentration
GO:0098771	GO:0098771	16	GO:0007204	0.893	2.5570344782041	0	inorganic ion homeostasis	positive regulation of cytosolic calcium ion concentration
GO:0050801	GO:0050801	16	GO:0007204	0.89	2.55615612914746	19	ion homeostasis	positive regulation of cytosolic calcium ion concentration
GO:0030001	GO:0030001	13	GO:0051924	0.839	2.55615612914746	11	metal ion transport	regulation of calcium ion transport
GO:0055082	GO:0055082	16	GO:0007204	0.895	2.55067217359328	1	cellular chemical homeostasis	positive regulation of cytosolic calcium ion concentration
GO:0032940	GO:0032940	13	GO:0051924	0.424	2.55067217359328	10	secretion by cell	regulation of calcium ion transport
GO:0005975	GO:0005975	19	GO:0005975	0.993	2.55067217359328	131	carbohydrate metabolic process	carbohydrate metabolic process
GO:1901615	GO:1901615	20	GO:1901615	0.994	2.5445611822317	0	organic hydroxy compound metabolic process	organic hydroxy compound metabolic process
GO:0006914	GO:0006914	21	GO:0006914	0.993	2.5445611822317	157	autophagy	autophagy
GO:0042770	GO:0042770	10	GO:0006302	0.702	2.5445611822317	10	signal transduction in response to DNA damage	double-strand break repair
GO:0032787	GO:0032787	22	GO:0032787	0.991	2.5445611822317	3	monocarboxylic acid metabolic process	monocarboxylic acid metabolic process
GO:0061919	GO:0061919	21	GO:0006914	0.993	2.5445611822317	0	process utilizing autophagic mechanism	autophagy
GO:0140352	GO:0140352	13	GO:0051924	0.427	2.5445611822317	0	export from cell	regulation of calcium ion transport
GO:0019725	GO:0019725	16	GO:0007204	0.883	2.53638001144961	16	cellular homeostasis	positive regulation of cytosolic calcium ion concentration
GO:0046903	GO:0046903	13	GO:0051924	0.431	2.53560364699086	8	secretion	regulation of calcium ion transport
GO:0090329	GO:0090329	4	GO:0006260	0.848	2.52858773542301	1	regulation of DNA-templated DNA replication	DNA replication
GO:0051383	GO:0051383	1	GO:0007051	0.358	2.52762310364303	6	kinetochore organization	spindle organization
GO:0140527	GO:0140527	4	GO:0006260	0.578	2.52762310364303	0	reciprocal homologous recombination	DNA replication
GO:0045143	GO:0045143	3	GO:0061982	0.929	2.52762310364303	9	homologous chromosome segregation	meiosis I cell cycle process
GO:0035825	GO:0035825	4	GO:0006260	0.584	2.52762310364303	9	homologous recombination	DNA replication
GO:0007131	GO:0007131	4	GO:0006260	0.578	2.52762310364303	39	reciprocal meiotic recombination	DNA replication
GO:0006812	GO:0006812	13	GO:0051924	0.802	2.51875189758034	27	cation transport	regulation of calcium ion transport
GO:0032506	GO:0032506	8	GO:0061640	0.853	2.50839421701884	4	cytokinetic process	cytoskeleton-dependent cytokinesis
GO:0008610	GO:0008610	15	GO:0006694	0.852	2.50783837520696	20	lipid biosynthetic process	steroid biosynthetic process
GO:0019953	GO:0019953	3	GO:0061982	0.695	2.50611270207406	9	sexual reproduction	meiosis I cell cycle process
GO:0019752	GO:0019752	22	GO:0032787	0.93	2.49394366389037	9	carboxylic acid metabolic process	monocarboxylic acid metabolic process
GO:0001659	GO:0001659	16	GO:0007204	0.61	2.49323490119375	20	temperature homeostasis	positive regulation of cytosolic calcium ion concentration
GO:0043436	GO:0043436	22	GO:0032787	0.928	2.49204410802373	0	oxoacid metabolic process	monocarboxylic acid metabolic process
GO:0006082	GO:0006082	22	GO:0032787	0.925	2.49123166461838	21	organic acid metabolic process	monocarboxylic acid metabolic process
GO:0055085	GO:0055085	13	GO:0051924	0.461	2.49123166461838	245	transmembrane transport	regulation of calcium ion transport
GO:0006811	GO:0006811	13	GO:0051924	0.742	2.49123166461838	105	ion transport	regulation of calcium ion transport
GO:0007586	GO:0007586	23	GO:0007586	0.999	2.49123166461838	27	digestion	digestion
GO:0019915	GO:0019915	24	GO:0019915	0.999	2.4831540200415	30	lipid storage	lipid storage
GO:0000079	GO:0000079	18	GO:0051338	0.805	2.45724648321971	56	regulation of cyclin-dependent protein serine/threonine kinase activity	regulation of transferase activity
GO:1904029	GO:1904029	18	GO:0051338	0.808	2.45724648321971	0	regulation of cyclin-dependent protein kinase activity	regulation of transferase activity
GO:1903532	GO:1903532	13	GO:0051924	0.636	2.45427905235576	0	positive regulation of secretion by cell	regulation of calcium ion transport
GO:0031109	GO:0031109	1	GO:0007051	0.732	2.45427905235576	1	microtubule polymerization or depolymerization	spindle organization
GO:0008203	GO:0008203	20	GO:1901615	0.863	2.45427905235576	89	cholesterol metabolic process	organic hydroxy compound metabolic process
GO:0044773	GO:0044773	6	GO:0045786	0.856	2.45427905235576	3	mitotic DNA damage checkpoint signaling	negative regulation of cell cycle
GO:0048771	GO:0048771	25	GO:0048771	0.999	2.45091653622034	9	tissue remodeling	tissue remodeling
GO:0016125	GO:0016125	15	GO:0006694	0.857	2.45091653622034	22	sterol metabolic process	steroid biosynthetic process
GO:0072507	GO:0072507	16	GO:0007204	0.94	2.45091653622034	1	divalent inorganic cation homeostasis	positive regulation of cytosolic calcium ion concentration
GO:0044255	GO:0044255	15	GO:0006694	0.705	2.45091653622034	22	cellular lipid metabolic process	steroid biosynthetic process
GO:0055074	GO:0055074	16	GO:0007204	0.949	2.45091653622034	34	calcium ion homeostasis	positive regulation of cytosolic calcium ion concentration
GO:0016042	GO:0016042	15	GO:0006694	0.611	2.44023900170915	74	lipid catabolic process	steroid biosynthetic process
GO:0062012	GO:0062012	22	GO:0032787	0.645	2.44007249984874	0	regulation of small molecule metabolic process	monocarboxylic acid metabolic process
GO:0006790	GO:0006790	26	GO:0006790	0.996	2.44007249984874	22	sulfur compound metabolic process	sulfur compound metabolic process
GO:0051293	GO:0051293	2	GO:0051656	0.827	2.44007089855942	7	establishment of spindle localization	establishment of organelle localization
GO:0016192	GO:0016192	13	GO:0051924	0.463	2.44007089855942	209	vesicle-mediated transport	regulation of calcium ion transport
GO:0043603	GO:0043603	27	GO:0043603	0.985	2.42899236227664	1	cellular amide metabolic process	cellular amide metabolic process
GO:0019216	GO:0019216	15	GO:0006694	0.608	2.4180451601577	42	regulation of lipid metabolic process	steroid biosynthetic process
GO:0043410	GO:0043410	28	GO:0043410	0.995	2.41133607188455	169	positive regulation of MAPK cascade	positive regulation of MAPK cascade
GO:0010506	GO:0010506	21	GO:0006914	0.915	2.41133607188455	81	regulation of autophagy	autophagy
GO:0051235	GO:0051235	24	GO:0019915	0.883	2.41133607188455	0	maintenance of location	lipid storage
GO:0030003	GO:0030003	16	GO:0007204	0.914	2.41133607188455	3	cellular cation homeostasis	positive regulation of cytosolic calcium ion concentration
GO:0051049	GO:0051049	13	GO:0051924	0.779	2.41133607188455	3	regulation of transport	regulation of calcium ion transport
GO:0055065	GO:0055065	16	GO:0007204	0.912	2.41133607188455	3	metal ion homeostasis	positive regulation of cytosolic calcium ion concentration
GO:2000045	GO:2000045	6	GO:0045786	0.719	2.41133607188455	55	regulation of G1/S transition of mitotic cell cycle	negative regulation of cell cycle
GO:0006631	GO:0006631	22	GO:0032787	0.95	2.41133607188455	94	fatty acid metabolic process	monocarboxylic acid metabolic process
GO:0006629	GO:0006629	15	GO:0006694	0.73	2.40859502534752	179	lipid metabolic process	steroid biosynthetic process
GO:2000241	GO:2000241	3	GO:0061982	0.608	2.40859502534752	2	regulation of reproductive process	meiosis I cell cycle process
GO:0045005	GO:0045005	4	GO:0006260	0.865	2.40859502534752	0	DNA-templated DNA replication maintenance of fidelity	DNA replication
GO:0046470	GO:0046470	15	GO:0006694	0.541	2.40042363271102	27	phosphatidylcholine metabolic process	steroid biosynthetic process
GO:0006897	GO:0006897	13	GO:0051924	0.41	2.39690361682232	209	endocytosis	regulation of calcium ion transport
GO:0042592	GO:0042592	16	GO:0007204	0.791	2.39007696556955	11	homeostatic process	positive regulation of cytosolic calcium ion concentration
GO:0062013	GO:0062013	22	GO:0032787	0.59	2.38187920163099	0	positive regulation of small molecule metabolic process	monocarboxylic acid metabolic process
GO:0010971	GO:0010971	6	GO:0045786	0.616	2.38187920163099	28	positive regulation of G2/M transition of mitotic cell cycle	negative regulation of cell cycle
GO:0044281	GO:0044281	22	GO:0032787	0.819	2.37120812369878	1	small molecule metabolic process	monocarboxylic acid metabolic process
GO:0009914	GO:0009914	16	GO:0007204	0.47	2.36197024685775	1	hormone transport	positive regulation of cytosolic calcium ion concentration
GO:0070507	GO:0070507	11	GO:0000226	0.836	2.36060933591916	43	regulation of microtubule cytoskeleton organization	microtubule cytoskeleton organization
GO:0033260	GO:0033260	4	GO:0006260	0.817	2.34902806388035	3	nuclear DNA replication	DNA replication
GO:0031297	GO:0031297	4	GO:0006260	0.85	2.34751738417075	55	replication fork processing	DNA replication
GO:1902750	GO:1902750	6	GO:0045786	0.852	2.34751738417075	2	negative regulation of cell cycle G2/M phase transition	negative regulation of cell cycle
GO:0010972	GO:0010972	6	GO:0045786	0.851	2.34751738417075	10	negative regulation of G2/M transition of mitotic cell cycle	negative regulation of cell cycle
GO:1902652	GO:1902652	20	GO:1901615	0.868	2.34428034610651	0	secondary alcohol metabolic process	organic hydroxy compound metabolic process
GO:0015849	GO:0015849	13	GO:0051924	0.402	2.33871777870504	0	organic acid transport	regulation of calcium ion transport
GO:0016197	GO:0016197	13	GO:0051924	0.379	2.33457640617015	85	endosomal transport	regulation of calcium ion transport
GO:0008654	GO:0008654	12	GO:0006468	0.633	2.3258049261891	25	phospholipid biosynthetic process	protein phosphorylation
GO:0015908	GO:0015908	13	GO:0051924	0.346	2.31930476975929	28	fatty acid transport	regulation of calcium ion transport
GO:0015918	GO:0015918	13	GO:0051924	0.349	2.31640249928369	19	sterol transport	regulation of calcium ion transport
GO:0006040	GO:0006040	29	GO:0006040	0.999	2.31640249928369	0	amino sugar metabolic process	amino sugar metabolic process
GO:1903530	GO:1903530	13	GO:0051924	0.685	2.31640249928369	0	regulation of secretion by cell	regulation of calcium ion transport
GO:0033993	GO:0033993	30	GO:0033993	0.991	2.31640249928369	14	response to lipid	response to lipid
GO:0043269	GO:0043269	13	GO:0051924	0.9	2.31248488377783	7	regulation of ion transport	regulation of calcium ion transport
GO:0048878	GO:0048878	16	GO:0007204	0.844	2.30406530668831	1	chemical homeostasis	positive regulation of cytosolic calcium ion concentration
GO:0019637	GO:0019637	12	GO:0006468	0.75	2.29023331096771	1	organophosphate metabolic process	protein phosphorylation
GO:0006268	GO:0006268	1	GO:0007051	0.359	2.28519502687157	30	DNA unwinding involved in DNA replication	spindle organization
GO:0030010	GO:0030010	31	GO:0030010	0.999	2.28519502687157	40	establishment of cell polarity	establishment of cell polarity
GO:0006887	GO:0006887	13	GO:0051924	0.394	2.2810864164788	107	exocytosis	regulation of calcium ion transport
GO:0007076	GO:0007076	1	GO:0007051	0.543	2.2810864164788	30	mitotic chromosome condensation	spindle organization
GO:1900087	GO:1900087	6	GO:0045786	0.648	2.2810864164788	53	positive regulation of G1/S transition of mitotic cell cycle	negative regulation of cell cycle
GO:1901135	GO:1901135	29	GO:0006040	0.702	2.26402607449694	1	carbohydrate derivative metabolic process	amino sugar metabolic process
GO:0048609	GO:0048609	3	GO:0061982	0.692	2.25928353141086	4	multicellular organismal reproductive process	meiosis I cell cycle process
GO:0045017	GO:0045017	15	GO:0006694	0.771	2.25763808388822	0	glycerolipid biosynthetic process	steroid biosynthetic process
GO:0016126	GO:0016126	15	GO:0006694	0.918	2.24167922474436	19	sterol biosynthetic process	steroid biosynthetic process
GO:1902653	GO:1902653	20	GO:1901615	0.805	2.24167922474436	0	secondary alcohol biosynthetic process	organic hydroxy compound metabolic process
GO:0006695	GO:0006695	20	GO:1901615	0.805	2.24167922474436	59	cholesterol biosynthetic process	organic hydroxy compound metabolic process
GO:0002682	GO:0002682	17	GO:0002377	0.537	2.24167922474436	21	regulation of immune system process	immunoglobulin production
GO:0010212	GO:0010212	32	GO:0010212	0.999	2.23641780331931	41	response to ionizing radiation	response to ionizing radiation
GO:0016310	GO:0016310	12	GO:0006468	0.954	2.23641780331931	129	phosphorylation	protein phosphorylation
GO:0003008	GO:0003008	33	GO:0003008	0.972	2.23483915805585	0	system process	system process
GO:0010817	GO:0010817	16	GO:0007204	0.5	2.22822359553091	4	regulation of hormone levels	positive regulation of cytosolic calcium ion concentration
GO:0003012	GO:0003012	33	GO:0003008	0.788	2.21856806819347	2	muscle system process	system process
GO:0002181	GO:0002181	27	GO:0043603	0.773	2.21856806819347	125	cytoplasmic translation	cellular amide metabolic process
GO:0042632	GO:0042632	16	GO:0007204	0.657	2.18282657624699	130	cholesterol homeostasis	positive regulation of cytosolic calcium ion concentration
GO:0055092	GO:0055092	16	GO:0007204	0.658	2.18282657624699	3	sterol homeostasis	positive regulation of cytosolic calcium ion concentration
GO:0051050	GO:0051050	13	GO:0051924	0.714	2.16819707282743	1	positive regulation of transport	regulation of calcium ion transport
GO:0032504	GO:0032504	3	GO:0061982	0.692	2.16819707282743	0	multicellular organism reproduction	meiosis I cell cycle process
GO:0007019	GO:0007019	1	GO:0007051	0.671	2.15977038775419	25	microtubule depolymerization	spindle organization
GO:0045637	GO:0045637	17	GO:0002377	0.426	2.15125529327297	5	regulation of myeloid cell differentiation	immunoglobulin production
GO:0009100	GO:0009100	29	GO:0006040	0.639	2.14927179831554	11	glycoprotein metabolic process	amino sugar metabolic process
GO:0070374	GO:0070374	28	GO:0043410	0.909	2.14287609435643	263	positive regulation of ERK1 and ERK2 cascade	positive regulation of MAPK cascade
GO:0002761	GO:0002761	17	GO:0002377	0.407	2.13878805388259	1	regulation of myeloid leukocyte differentiation	immunoglobulin production
GO:0001824	GO:0001824	34	GO:0001824	0.999	2.13211146932705	22	blastocyst development	blastocyst development
GO:1901617	GO:1901617	20	GO:1901615	0.912	2.11410285878826	0	organic hydroxy compound biosynthetic process	organic hydroxy compound metabolic process
GO:0016236	GO:0016236	21	GO:0006914	0.932	2.10250289591138	76	macroautophagy	autophagy
GO:0098662	GO:0098662	13	GO:0051924	0.762	2.1005065771005	17	inorganic cation transmembrane transport	regulation of calcium ion transport
GO:0045740	GO:0045740	4	GO:0006260	0.821	2.07149271975918	30	positive regulation of DNA replication	DNA replication
GO:0046879	GO:0046879	16	GO:0007204	0.469	2.04181451945969	5	hormone secretion	positive regulation of cytosolic calcium ion concentration
GO:0045859	GO:0045859	18	GO:0051338	0.959	2.04158447597596	17	regulation of protein kinase activity	regulation of transferase activity
GO:0007163	GO:0007163	31	GO:0030010	0.956	2.03416878048147	57	establishment or maintenance of cell polarity	establishment of cell polarity
GO:2000779	GO:2000779	10	GO:0006302	0.908	1.99191129485623	29	regulation of double-strand break repair	double-strand break repair
GO:0051129	GO:0051129	7	GO:2001251	0.842	1.99009805184845	0	negative regulation of cellular component organization	negative regulation of chromosome organization
GO:0051298	GO:0051298	11	GO:0000226	0.795	1.97895440302506	19	centrosome duplication	microtubule cytoskeleton organization
GO:0061351	GO:0061351	35	GO:0061351	0.999	1.97895440302506	21	neural precursor cell proliferation	neural precursor cell proliferation
GO:0098660	GO:0098660	13	GO:0051924	0.681	1.96950074007274	0	inorganic ion transmembrane transport	regulation of calcium ion transport
GO:0045444	GO:0045444	36	GO:0045444	0.998	1.96236264058089	76	fat cell differentiation	fat cell differentiation
GO:0072657	GO:0072657	2	GO:0051656	0.586	1.95573245872846	22	protein localization to membrane	establishment of organelle localization
GO:0000018	GO:0000018	4	GO:0006260	0.611	1.94007471207077	6	regulation of DNA recombination	DNA replication
GO:0046605	GO:0046605	11	GO:0000226	0.758	1.93799017689465	7	regulation of centrosome cycle	microtubule cytoskeleton organization
GO:0002683	GO:0002683	17	GO:0002377	0.462	1.92593294736519	1	negative regulation of immune system process	immunoglobulin production
GO:1905477	GO:1905477	2	GO:0051656	0.493	1.92593294736519	6	positive regulation of protein localization to membrane	establishment of organelle localization
GO:0032370	GO:0032370	14	GO:1905954	0.976	1.92593294736519	2	positive regulation of lipid transport	positive regulation of lipid localization
GO:0005996	GO:0005996	19	GO:0005975	0.91	1.92025251049011	1	monosaccharide metabolic process	carbohydrate metabolic process
GO:0051347	GO:0051347	18	GO:0051338	0.943	1.92025251049011	0	positive regulation of transferase activity	regulation of transferase activity
GO:0031399	GO:0031399	37	GO:0031399	0.983	1.92025251049011	0	regulation of protein modification process	regulation of protein modification process
GO:0002573	GO:0002573	17	GO:0002377	0.432	1.92025251049011	3	myeloid leukocyte differentiation	immunoglobulin production
GO:0007155	GO:0007155	38	GO:0007155	0.981	1.9189225451129	499	cell adhesion	cell adhesion
GO:0060401	GO:0060401	13	GO:0051924	0.86	1.91458610493658	0	cytosolic calcium ion transport	regulation of calcium ion transport
GO:0019722	GO:0019722	28	GO:0043410	0.557	1.91458610493658	97	calcium-mediated signaling	positive regulation of MAPK cascade
GO:0051047	GO:0051047	13	GO:0051924	0.642	1.89634748051433	5	positive regulation of secretion	regulation of calcium ion transport
GO:0032680	GO:0032680	39	GO:0032680	0.999	1.89024799225991	12	regulation of tumor necrosis factor production	regulation of tumor necrosis factor production
GO:0032640	GO:0032640	39	GO:0032680	0.999	1.89024799225991	0	tumor necrosis factor production	regulation of tumor necrosis factor production
GO:0071706	GO:0071706	39	GO:0032680	0.995	1.89024799225991	0	tumor necrosis factor superfamily cytokine production	regulation of tumor necrosis factor production
GO:1903555	GO:1903555	39	GO:0032680	0.995	1.89024799225991	0	regulation of tumor necrosis factor superfamily cytokine production	regulation of tumor necrosis factor production
GO:0032963	GO:0032963	40	GO:0032963	0.999	1.87391590442428	15	collagen metabolic process	collagen metabolic process
GO:0019318	GO:0019318	19	GO:0005975	0.903	1.87391590442428	0	hexose metabolic process	carbohydrate metabolic process
GO:0010959	GO:0010959	13	GO:0051924	0.945	1.86715909138685	0	regulation of metal ion transport	regulation of calcium ion transport
GO:0098655	GO:0098655	13	GO:0051924	0.772	1.86708943144194	48	cation transmembrane transport	regulation of calcium ion transport
GO:1902533	GO:1902533	28	GO:0043410	0.906	1.86575816971887	11	positive regulation of intracellular signal transduction	positive regulation of MAPK cascade
GO:0015711	GO:0015711	13	GO:0051924	0.635	1.86393650574394	23	organic anion transport	regulation of calcium ion transport
GO:0051785	GO:0051785	7	GO:2001251	0.59	1.86393650574394	0	positive regulation of nuclear division	negative regulation of chromosome organization
GO:0006091	GO:0006091	41	GO:0006091	0.994	1.84770306982311	48	generation of precursor metabolites and energy	generation of precursor metabolites and energy
GO:0006271	GO:0006271	4	GO:0006260	0.776	1.84755622513769	8	DNA strand elongation involved in DNA replication	DNA replication
GO:0051493	GO:0051493	7	GO:2001251	0.713	1.84435038280941	25	regulation of cytoskeleton organization	negative regulation of chromosome organization
GO:0051046	GO:0051046	13	GO:0051924	0.692	1.83828027749276	4	regulation of secretion	regulation of calcium ion transport
GO:0033344	GO:0033344	13	GO:0051924	0.34	1.83416847198929	48	cholesterol efflux	regulation of calcium ion transport
GO:0042391	GO:0042391	16	GO:0007204	0.5	1.81486458962803	112	regulation of membrane potential	positive regulation of cytosolic calcium ion concentration
GO:0044818	GO:0044818	6	GO:0045786	0.839	1.81486458962803	23	mitotic G2/M transition checkpoint	negative regulation of cell cycle
GO:0006334	GO:0006334	1	GO:0007051	0.408	1.80994645046809	169	nucleosome assembly	spindle organization
GO:0051668	GO:0051668	2	GO:0051656	0.595	1.77808004873058	4	localization within membrane	establishment of organelle localization
GO:1901566	GO:1901566	27	GO:0043603	0.309	1.77310806476212	0	organonitrogen compound biosynthetic process	cellular amide metabolic process
GO:0034220	GO:0034220	13	GO:0051924	0.705	1.7689281358057	142	ion transmembrane transport	regulation of calcium ion transport
GO:0022600	GO:0022600	23	GO:0007586	0.982	1.76717967673938	0	digestive system process	digestion
GO:0046883	GO:0046883	16	GO:0007204	0.457	1.75371297278077	6	regulation of hormone secretion	positive regulation of cytosolic calcium ion concentration
GO:0019882	GO:0019882	17	GO:0002377	0.418	1.75371297278077	24	antigen processing and presentation	immunoglobulin production
GO:0043549	GO:0043549	18	GO:0051338	0.976	1.75245641991868	6	regulation of kinase activity	regulation of transferase activity
GO:0006941	GO:0006941	33	GO:0003008	0.715	1.72771672541196	17	striated muscle contraction	system process
GO:0006282	GO:0006282	10	GO:0006302	0.794	1.72722202804782	43	regulation of DNA repair	double-strand break repair
GO:0031497	GO:0031497	1	GO:0007051	0.428	1.72722202804782	0	chromatin assembly	spindle organization
GO:0007611	GO:0007611	33	GO:0003008	0.722	1.71433603430185	68	learning or memory	system process
GO:0002440	GO:0002440	17	GO:0002377	0.958	1.71159379952757	0	production of molecular mediator of immune response	immunoglobulin production
GO:0006518	GO:0006518	27	GO:0043603	0.958	1.70854489949368	13	peptide metabolic process	cellular amide metabolic process
GO:0046890	GO:0046890	15	GO:0006694	0.731	1.70698713849785	9	regulation of lipid biosynthetic process	steroid biosynthetic process
GO:0006639	GO:0006639	15	GO:0006694	0.567	1.70666531263208	1	acylglycerol metabolic process	steroid biosynthetic process
GO:0006638	GO:0006638	15	GO:0006694	0.567	1.70666531263208	1	neutral lipid metabolic process	steroid biosynthetic process
GO:0051382	GO:0051382	1	GO:0007051	0.352	1.70245432284328	17	kinetochore assembly	spindle organization
GO:0097237	GO:0097237	30	GO:0033993	0.409	1.68515139952287	7	cellular response to toxic substance	response to lipid
GO:0018105	GO:0018105	37	GO:0031399	0.549	1.6731145716985	230	peptidyl-serine phosphorylation	regulation of protein modification process
GO:0042098	GO:0042098	35	GO:0061351	0.566	1.67258878939531	40	T cell proliferation	neural precursor cell proliferation
GO:2000573	GO:2000573	4	GO:0006260	0.592	1.6702373489516	19	positive regulation of DNA biosynthetic process	DNA replication
GO:0001932	GO:0001932	37	GO:0031399	0.94	1.66559613527472	44	regulation of protein phosphorylation	regulation of protein modification process
GO:0042180	GO:0042180	22	GO:0032787	0.625	1.66559613527472	3	cellular ketone metabolic process	monocarboxylic acid metabolic process
GO:2000278	GO:2000278	4	GO:0006260	0.617	1.64927232166629	9	regulation of DNA biosynthetic process	DNA replication
GO:0071479	GO:0071479	32	GO:0010212	0.95	1.63644329119236	41	cellular response to ionizing radiation	response to ionizing radiation
GO:0055088	GO:0055088	16	GO:0007204	0.7	1.63317695163742	51	lipid homeostasis	positive regulation of cytosolic calcium ion concentration
GO:0021537	GO:0021537	42	GO:0021537	0.998	1.62382848322167	17	telencephalon development	telencephalon development
GO:2001252	GO:2001252	7	GO:2001251	0.839	1.62357790498624	2	positive regulation of chromosome organization	negative regulation of chromosome organization
GO:0060048	GO:0060048	33	GO:0003008	0.693	1.62133539279045	52	cardiac muscle contraction	system process
GO:0050890	GO:0050890	33	GO:0003008	0.732	1.61564705459073	51	cognition	system process
GO:0051053	GO:0051053	4	GO:0006260	0.624	1.60734875619588	1	negative regulation of DNA metabolic process	DNA replication
GO:0006820	GO:0006820	13	GO:0051924	0.656	1.60530982173522	18	anion transport	regulation of calcium ion transport
GO:0007610	GO:0007610	43	GO:0007610	0.993	1.605099474069	5	behavior	behavior
GO:0090224	GO:0090224	11	GO:0000226	0.75	1.605099474069	0	regulation of spindle organization	microtubule cytoskeleton organization
GO:0032200	GO:0032200	1	GO:0007051	0.441	1.59853308107206	27	telomere organization	spindle organization
GO:0043413	GO:0043413	37	GO:0031399	0.538	1.59148366022299	1	macromolecule glycosylation	regulation of protein modification process
GO:0006486	GO:0006486	37	GO:0031399	0.555	1.59148366022299	114	protein glycosylation	regulation of protein modification process
GO:1903522	GO:1903522	33	GO:0003008	0.752	1.59148366022299	0	regulation of blood circulation	system process
GO:0044283	GO:0044283	22	GO:0032787	0.692	1.58960619862902	0	small molecule biosynthetic process	monocarboxylic acid metabolic process
GO:0000723	GO:0000723	1	GO:0007051	0.438	1.58935821650427	63	telomere maintenance	spindle organization
GO:0018209	GO:0018209	37	GO:0031399	0.553	1.58670618550306	0	peptidyl-serine modification	regulation of protein modification process
GO:0030099	GO:0030099	17	GO:0002377	0.457	1.56953101872447	23	myeloid cell differentiation	immunoglobulin production
GO:0001508	GO:0001508	16	GO:0007204	0.458	1.55403607990025	15	action potential	positive regulation of cytosolic calcium ion concentration
GO:0008284	GO:0008284	35	GO:0061351	0.645	1.54550961236805	584	positive regulation of cell population proliferation	neural precursor cell proliferation
GO:0061025	GO:0061025	44	GO:0061025	0.998	1.54550961236805	36	membrane fusion	membrane fusion
GO:0019932	GO:0019932	28	GO:0043410	0.579	1.54500515978055	3	second-messenger-mediated signaling	positive regulation of MAPK cascade
GO:0043604	GO:0043604	27	GO:0043603	0.953	1.53247560643744	2	amide biosynthetic process	cellular amide metabolic process
GO:0009101	GO:0009101	29	GO:0006040	0.627	1.51931421176973	11	glycoprotein biosynthetic process	amino sugar metabolic process
GO:0007095	GO:0007095	6	GO:0045786	0.8	1.51300396245409	40	mitotic G2 DNA damage checkpoint signaling	negative regulation of cell cycle
GO:0006936	GO:0006936	33	GO:0003008	0.761	1.50422073679133	91	muscle contraction	system process
GO:0060047	GO:0060047	33	GO:0003008	0.762	1.49724133462571	22	heart contraction	system process
GO:0003015	GO:0003015	33	GO:0003008	0.765	1.49724133462571	6	heart process	system process
GO:0035383	GO:0035383	26	GO:0006790	0.883	1.49630900757646	0	thioester metabolic process	sulfur compound metabolic process
GO:0006637	GO:0006637	26	GO:0006790	0.883	1.49630900757646	35	acyl-CoA metabolic process	sulfur compound metabolic process
GO:0072698	GO:0072698	2	GO:0051656	0.472	1.48781657969633	0	protein localization to microtubule cytoskeleton	establishment of organelle localization
GO:0044380	GO:0044380	2	GO:0051656	0.475	1.48781657969633	3	protein localization to cytoskeleton	establishment of organelle localization
GO:0048871	GO:0048871	16	GO:0007204	0.676	1.48116299183737	3	multicellular organismal homeostasis	positive regulation of cytosolic calcium ion concentration
GO:0032409	GO:0032409	18	GO:0051338	0.626	1.48116299183737	2	regulation of transporter activity	regulation of transferase activity
GO:0046849	GO:0046849	25	GO:0048771	0.948	1.48116299183737	16	bone remodeling	tissue remodeling
GO:0006909	GO:0006909	13	GO:0051924	0.383	1.47870508450814	75	phagocytosis	regulation of calcium ion transport
GO:1990748	GO:1990748	30	GO:0033993	0.407	1.47782191641858	2	cellular detoxification	response to lipid

## Sheet: clustered_gsea_GO_terms_TNFA
	go	cluster	parent	parentSimScore	score	size	term	parentTerm
GO:0045143	GO:0045143	1	GO:0045143	0.999	2.79976209058213	9	homologous chromosome segregation	homologous chromosome segregation
GO:0006310	GO:0006310	2	GO:0006310	0.996	2.79976209058213	61	DNA recombination	DNA recombination
GO:0034097	GO:0034097	3	GO:0034097	0.99	2.79976209058213	46	response to cytokine	response to cytokine
GO:0071173	GO:0071173	4	GO:0071173	1	2.79976209058213	0	spindle assembly checkpoint signaling	spindle assembly checkpoint signaling
GO:0061982	GO:0061982	1	GO:0045143	0.929	2.79976209058213	0	meiosis I cell cycle process	homologous chromosome segregation
GO:0044839	GO:0044839	4	GO:0071173	0.716	2.79976209058213	2	cell cycle G2/M phase transition	spindle assembly checkpoint signaling
GO:0007127	GO:0007127	1	GO:0045143	0.937	2.79976209058213	7	meiosis I	homologous chromosome segregation
GO:0007052	GO:0007052	5	GO:0007052	0.999	2.79976209058213	63	mitotic spindle organization	mitotic spindle organization
GO:0000226	GO:0000226	5	GO:0007052	0.821	2.79976209058213	151	microtubule cytoskeleton organization	mitotic spindle organization
GO:1901989	GO:1901989	4	GO:0071173	0.734	2.79976209058213	1	positive regulation of cell cycle phase transition	spindle assembly checkpoint signaling
GO:0044770	GO:0044770	4	GO:0071173	0.796	2.79976209058213	6	cell cycle phase transition	spindle assembly checkpoint signaling
GO:0006261	GO:0006261	2	GO:0006310	0.651	2.79976209058213	32	DNA-templated DNA replication	DNA recombination
GO:0000725	GO:0000725	2	GO:0006310	0.927	2.79976209058213	6	recombinational repair	DNA recombination
GO:1902099	GO:1902099	6	GO:1902099	0.999	2.79976209058213	0	regulation of metaphase/anaphase transition of cell cycle	regulation of metaphase/anaphase transition of cell cycle
GO:0051301	GO:0051301	7	GO:0051301	0.995	2.79976209058213	353	cell division	cell division
GO:1902850	GO:1902850	5	GO:0007052	0.98	2.79976209058213	2	microtubule cytoskeleton organization involved in mitosis	mitotic spindle organization
GO:0035825	GO:0035825	2	GO:0006310	0.855	2.79976209058213	9	homologous recombination	DNA recombination
GO:0051783	GO:0051783	8	GO:0051783	0.999	2.79976209058213	0	regulation of nuclear division	regulation of nuclear division
GO:0032508	GO:0032508	9	GO:0032508	0.999	2.79976209058213	83	DNA duplex unwinding	DNA duplex unwinding
GO:0051784	GO:0051784	8	GO:0051783	0.947	2.79976209058213	0	negative regulation of nuclear division	regulation of nuclear division
GO:1902749	GO:1902749	4	GO:0071173	0.737	2.79976209058213	6	regulation of cell cycle G2/M phase transition	spindle assembly checkpoint signaling
GO:0070507	GO:0070507	5	GO:0007052	0.712	2.79976209058213	43	regulation of microtubule cytoskeleton organization	mitotic spindle organization
GO:0051303	GO:0051303	10	GO:0051303	0.999	2.79976209058213	3	establishment of chromosome localization	establishment of chromosome localization
GO:0008608	GO:0008608	6	GO:1902099	0.734	2.79976209058213	19	attachment of spindle microtubules to kinetochore	regulation of metaphase/anaphase transition of cell cycle
GO:0051304	GO:0051304	6	GO:1902099	0.764	2.79976209058213	4	chromosome separation	regulation of metaphase/anaphase transition of cell cycle
GO:2000816	GO:2000816	6	GO:1902099	0.937	2.79976209058213	3	negative regulation of mitotic sister chromatid separation	regulation of metaphase/anaphase transition of cell cycle
GO:0006270	GO:0006270	2	GO:0006310	0.564	2.79976209058213	30	DNA replication initiation	DNA recombination
GO:0033046	GO:0033046	6	GO:1902099	0.937	2.79976209058213	0	negative regulation of sister chromatid segregation	regulation of metaphase/anaphase transition of cell cycle
GO:1901988	GO:1901988	4	GO:0071173	0.868	2.79976209058213	1	negative regulation of cell cycle phase transition	spindle assembly checkpoint signaling
GO:0071621	GO:0071621	11	GO:0071621	0.999	2.79976209058213	6	granulocyte chemotaxis	granulocyte chemotaxis
GO:0019221	GO:0019221	3	GO:0034097	0.918	2.79976209058213	168	cytokine-mediated signaling pathway	response to cytokine
GO:0033260	GO:0033260	2	GO:0006310	0.555	2.79976209058213	3	nuclear DNA replication	DNA recombination
GO:0000070	GO:0000070	6	GO:1902099	0.887	2.79976209058213	36	mitotic sister chromatid segregation	regulation of metaphase/anaphase transition of cell cycle
GO:0010564	GO:0010564	4	GO:0071173	0.765	2.79976209058213	15	regulation of cell cycle process	spindle assembly checkpoint signaling
GO:0007276	GO:0007276	1	GO:0045143	0.628	2.79976209058213	20	gamete generation	homologous chromosome segregation
GO:1901987	GO:1901987	4	GO:0071173	0.823	2.79976209058213	3	regulation of cell cycle phase transition	spindle assembly checkpoint signaling
GO:0006302	GO:0006302	12	GO:0006302	0.996	2.79976209058213	100	double-strand break repair	double-strand break repair
GO:1905819	GO:1905819	6	GO:1902099	0.905	2.79976209058213	0	negative regulation of chromosome separation	regulation of metaphase/anaphase transition of cell cycle
GO:0000819	GO:0000819	6	GO:1902099	0.902	2.79976209058213	3	sister chromatid segregation	regulation of metaphase/anaphase transition of cell cycle
GO:0090307	GO:0090307	5	GO:0007052	0.951	2.79976209058213	51	mitotic spindle assembly	mitotic spindle organization
GO:0045786	GO:0045786	4	GO:0071173	0.833	2.79976209058213	53	negative regulation of cell cycle	spindle assembly checkpoint signaling
GO:0061640	GO:0061640	7	GO:0051301	0.868	2.79976209058213	23	cytoskeleton-dependent cytokinesis	cell division
GO:0048285	GO:0048285	8	GO:0051783	0.852	2.79976209058213	0	organelle fission	regulation of nuclear division
GO:0032496	GO:0032496	13	GO:0032496	0.997	2.79976209058213	134	response to lipopolysaccharide	response to lipopolysaccharide
GO:0007080	GO:0007080	10	GO:0051303	0.965	2.79976209058213	47	mitotic metaphase plate congression	establishment of chromosome localization
GO:0097530	GO:0097530	11	GO:0071621	0.982	2.79976209058213	2	granulocyte migration	granulocyte chemotaxis
GO:0007143	GO:0007143	1	GO:0045143	0.772	2.79976209058213	7	female meiotic nuclear division	homologous chromosome segregation
GO:0007292	GO:0007292	1	GO:0045143	0.553	2.79976209058213	19	female gamete generation	homologous chromosome segregation
GO:0006260	GO:0006260	2	GO:0006310	0.679	2.79976209058213	102	DNA replication	DNA recombination
GO:0009617	GO:0009617	13	GO:0032496	0.895	2.79976209058213	116	response to bacterium	response to lipopolysaccharide
GO:0051310	GO:0051310	10	GO:0051303	0.983	2.79976209058213	17	metaphase plate congression	establishment of chromosome localization
GO:0007346	GO:0007346	4	GO:0071173	0.667	2.79976209058213	65	regulation of mitotic cell cycle	spindle assembly checkpoint signaling
GO:0007017	GO:0007017	5	GO:0007052	0.772	2.79976209058213	17	microtubule-based process	mitotic spindle organization
GO:0007091	GO:0007091	6	GO:1902099	0.992	2.79976209058213	9	metaphase/anaphase transition of mitotic cell cycle	regulation of metaphase/anaphase transition of cell cycle
GO:0034502	GO:0034502	10	GO:0051303	0.441	2.79976209058213	3	protein localization to chromosome	establishment of chromosome localization
GO:0010389	GO:0010389	4	GO:0071173	0.731	2.79976209058213	11	regulation of G2/M transition of mitotic cell cycle	spindle assembly checkpoint signaling
GO:0071459	GO:0071459	10	GO:0051303	0.41	2.79976209058213	7	protein localization to chromosome, centromeric region	establishment of chromosome localization
GO:0033044	GO:0033044	9	GO:0032508	0.644	2.79976209058213	19	regulation of chromosome organization	DNA duplex unwinding
GO:0006281	GO:0006281	12	GO:0006302	0.907	2.79976209058213	263	DNA repair	double-strand break repair
GO:0098813	GO:0098813	6	GO:1902099	0.868	2.79976209058213	2	nuclear chromosome segregation	regulation of metaphase/anaphase transition of cell cycle
GO:0045069	GO:0045069	14	GO:0045069	0.999	2.79976209058213	3	regulation of viral genome replication	regulation of viral genome replication
GO:0044784	GO:0044784	6	GO:1902099	0.994	2.79976209058213	0	metaphase/anaphase transition of cell cycle	regulation of metaphase/anaphase transition of cell cycle
GO:1902100	GO:1902100	6	GO:1902099	0.965	2.79976209058213	0	negative regulation of metaphase/anaphase transition of cell cycle	regulation of metaphase/anaphase transition of cell cycle
GO:0000280	GO:0000280	8	GO:0051783	0.861	2.79976209058213	0	nuclear division	regulation of nuclear division
GO:2001251	GO:2001251	9	GO:0032508	0.594	2.79976209058213	1	negative regulation of chromosome organization	DNA duplex unwinding
GO:0071824	GO:0071824	15	GO:0071824	0.998	2.79976209058213	0	protein-DNA complex subunit organization	protein-DNA complex subunit organization
GO:0051306	GO:0051306	6	GO:1902099	0.831	2.79976209058213	5	mitotic sister chromatid separation	regulation of metaphase/anaphase transition of cell cycle
GO:0010639	GO:0010639	8	GO:0051783	0.695	2.79976209058213	0	negative regulation of organelle organization	regulation of nuclear division
GO:0045931	GO:0045931	4	GO:0071173	0.593	2.79976209058213	33	positive regulation of mitotic cell cycle	spindle assembly checkpoint signaling
GO:0000910	GO:0000910	7	GO:0051301	0.906	2.79976209058213	0	cytokinesis	cell division
GO:0000281	GO:0000281	7	GO:0051301	0.842	2.79976209058213	76	mitotic cytokinesis	cell division
GO:0098586	GO:0098586	13	GO:0032496	0.579	2.79976209058213	87	cellular response to virus	response to lipopolysaccharide
GO:0072678	GO:0072678	11	GO:0071621	0.743	2.79976209058213	10	T cell migration	granulocyte chemotaxis
GO:0071222	GO:0071222	13	GO:0032496	0.963	2.79976209058213	194	cellular response to lipopolysaccharide	response to lipopolysaccharide
GO:0007094	GO:0007094	4	GO:0071173	0.999	2.79976209058213	44	mitotic spindle assembly checkpoint signaling	spindle assembly checkpoint signaling
GO:0007131	GO:0007131	2	GO:0006310	0.846	2.79976209058213	39	reciprocal meiotic recombination	DNA recombination
GO:1901992	GO:1901992	4	GO:0071173	0.721	2.79976209058213	3	positive regulation of mitotic cell cycle phase transition	spindle assembly checkpoint signaling
GO:0007093	GO:0007093	4	GO:0071173	0.873	2.79976209058213	4	mitotic cell cycle checkpoint signaling	spindle assembly checkpoint signaling
GO:0033048	GO:0033048	6	GO:1902099	0.937	2.79976209058213	0	negative regulation of mitotic sister chromatid segregation	regulation of metaphase/anaphase transition of cell cycle
GO:0033047	GO:0033047	6	GO:1902099	0.948	2.79976209058213	0	regulation of mitotic sister chromatid segregation	regulation of metaphase/anaphase transition of cell cycle
GO:0051338	GO:0051338	16	GO:0051338	0.992	2.79976209058213	0	regulation of transferase activity	regulation of transferase activity
GO:0045087	GO:0045087	12	GO:0006302	0.497	2.79976209058213	608	innate immune response	double-strand break repair
GO:0022412	GO:0022412	1	GO:0045143	0.6	2.79976209058213	0	cellular process involved in reproduction in multicellular organism	homologous chromosome segregation
GO:0007018	GO:0007018	5	GO:0007052	0.706	2.79976209058213	91	microtubule-based movement	mitotic spindle organization
GO:0044786	GO:0044786	2	GO:0006310	0.559	2.79976209058213	0	cell cycle DNA replication	DNA recombination
GO:0051985	GO:0051985	6	GO:1902099	0.905	2.79976209058213	0	negative regulation of chromosome segregation	regulation of metaphase/anaphase transition of cell cycle
GO:0050000	GO:0050000	10	GO:0051303	0.998	2.79976209058213	0	chromosome localization	establishment of chromosome localization
GO:0051302	GO:0051302	7	GO:0051301	0.888	2.79976209058213	23	regulation of cell division	cell division
GO:0031577	GO:0031577	4	GO:0071173	0.999	2.79976209058213	0	spindle checkpoint signaling	spindle assembly checkpoint signaling
GO:0045787	GO:0045787	4	GO:0071173	0.644	2.79976209058213	35	positive regulation of cell cycle	spindle assembly checkpoint signaling
GO:0006268	GO:0006268	9	GO:0032508	0.91	2.79976209058213	30	DNA unwinding involved in DNA replication	DNA duplex unwinding
GO:0034501	GO:0034501	10	GO:0051303	0.391	2.79976209058213	17	protein localization to kinetochore	establishment of chromosome localization
GO:0002237	GO:0002237	13	GO:0032496	0.984	2.79976209058213	9	response to molecule of bacterial origin	response to lipopolysaccharide
GO:0034508	GO:0034508	15	GO:0071824	0.847	2.79976209058213	3	centromere complex assembly	protein-DNA complex subunit organization
GO:0071174	GO:0071174	4	GO:0071173	0.997	2.79976209058213	0	mitotic spindle checkpoint signaling	spindle assembly checkpoint signaling
GO:0051445	GO:0051445	1	GO:0045143	0.757	2.79976209058213	20	regulation of meiotic cell cycle	homologous chromosome segregation
GO:0045930	GO:0045930	4	GO:0071173	0.8	2.79976209058213	33	negative regulation of mitotic cell cycle	spindle assembly checkpoint signaling
GO:0065004	GO:0065004	15	GO:0071824	0.986	2.79976209058213	3	protein-DNA complex assembly	protein-DNA complex subunit organization
GO:0045132	GO:0045132	1	GO:0045143	0.962	2.79976209058213	4	meiotic chromosome segregation	homologous chromosome segregation
GO:0051054	GO:0051054	2	GO:0006310	0.673	2.79976209058213	2	positive regulation of DNA metabolic process	DNA recombination
GO:0051607	GO:0051607	12	GO:0006302	0.448	2.79976209058213	264	defense response to virus	double-strand break repair
GO:0032465	GO:0032465	7	GO:0051301	0.844	2.79976209058213	53	regulation of cytokinesis	cell division
GO:0051640	GO:0051640	10	GO:0051303	0.833	2.79976209058213	4	organelle localization	establishment of chromosome localization
GO:0071216	GO:0071216	13	GO:0032496	0.617	2.79976209058213	0	cellular response to biotic stimulus	response to lipopolysaccharide
GO:0006275	GO:0006275	2	GO:0006310	0.617	2.79976209058213	46	regulation of DNA replication	DNA recombination
GO:0007062	GO:0007062	6	GO:1902099	0.815	2.79976209058213	26	sister chromatid cohesion	regulation of metaphase/anaphase transition of cell cycle
GO:0000079	GO:0000079	16	GO:0051338	0.805	2.79976209058213	56	regulation of cyclin-dependent protein serine/threonine kinase activity	regulation of transferase activity
GO:0007051	GO:0007051	5	GO:0007052	0.962	2.79976209058213	22	spindle organization	mitotic spindle organization
GO:1990266	GO:1990266	11	GO:0071621	0.958	2.79976209058213	12	neutrophil migration	granulocyte chemotaxis
GO:0032886	GO:0032886	5	GO:0007052	0.67	2.79976209058213	11	regulation of microtubule-based process	mitotic spindle organization
GO:1903046	GO:1903046	1	GO:0045143	0.889	2.79976209058213	0	meiotic cell cycle process	homologous chromosome segregation
GO:0140014	GO:0140014	8	GO:0051783	0.827	2.79976209058213	6	mitotic nuclear division	regulation of nuclear division
GO:0019079	GO:0019079	14	GO:0045069	0.975	2.79976209058213	14	viral genome replication	regulation of viral genome replication
GO:0051383	GO:0051383	9	GO:0032508	0.531	2.79976209058213	6	kinetochore organization	DNA duplex unwinding
GO:1901991	GO:1901991	4	GO:0071173	0.843	2.79976209058213	4	negative regulation of mitotic cell cycle phase transition	spindle assembly checkpoint signaling
GO:0140546	GO:0140546	12	GO:0006302	0.448	2.79976209058213	0	defense response to symbiont	double-strand break repair
GO:0031023	GO:0031023	5	GO:0007052	0.717	2.79976209058213	12	microtubule organizing center organization	mitotic spindle organization
GO:0090329	GO:0090329	2	GO:0006310	0.577	2.79976209058213	1	regulation of DNA-templated DNA replication	DNA recombination
GO:0010972	GO:0010972	4	GO:0071173	0.782	2.79976209058213	10	negative regulation of G2/M transition of mitotic cell cycle	spindle assembly checkpoint signaling
GO:0071103	GO:0071103	9	GO:0032508	0.983	2.79976209058213	2	DNA conformation change	DNA duplex unwinding
GO:1904029	GO:1904029	16	GO:0051338	0.808	2.79976209058213	0	regulation of cyclin-dependent protein kinase activity	regulation of transferase activity
GO:0000086	GO:0000086	4	GO:0071173	0.711	2.79976209058213	62	G2/M transition of mitotic cell cycle	spindle assembly checkpoint signaling
GO:0051983	GO:0051983	6	GO:1902099	0.966	2.79976209058213	13	regulation of chromosome segregation	regulation of metaphase/anaphase transition of cell cycle
GO:0033045	GO:0033045	6	GO:1902099	0.985	2.79976209058213	2	regulation of sister chromatid segregation	regulation of metaphase/anaphase transition of cell cycle
GO:0009615	GO:0009615	13	GO:0032496	0.656	2.79976209058213	117	response to virus	response to lipopolysaccharide
GO:0045839	GO:0045839	8	GO:0051783	0.939	2.79976209058213	9	negative regulation of mitotic nuclear division	regulation of nuclear division
GO:0045841	GO:0045841	6	GO:1902099	0.961	2.79976209058213	2	negative regulation of mitotic metaphase/anaphase transition	regulation of metaphase/anaphase transition of cell cycle
GO:0010948	GO:0010948	4	GO:0071173	0.855	2.79976209058213	2	negative regulation of cell cycle process	spindle assembly checkpoint signaling
GO:0051321	GO:0051321	1	GO:0045143	0.87	2.79976209058213	72	meiotic cell cycle	homologous chromosome segregation
GO:0008284	GO:0008284	17	GO:0008284	0.99	2.79976209058213	584	positive regulation of cell population proliferation	positive regulation of cell population proliferation
GO:1902806	GO:1902806	4	GO:0071173	0.766	2.79976209058213	9	regulation of cell cycle G1/S phase transition	spindle assembly checkpoint signaling
GO:0051653	GO:0051653	10	GO:0051303	0.693	2.79976209058213	5	spindle localization	establishment of chromosome localization
GO:1901990	GO:1901990	4	GO:0071173	0.804	2.79976209058213	10	regulation of mitotic cell cycle phase transition	spindle assembly checkpoint signaling
GO:0140013	GO:0140013	1	GO:0045143	0.903	2.79976209058213	5	meiotic nuclear division	homologous chromosome segregation
GO:0007059	GO:0007059	6	GO:1902099	0.85	2.79976209058213	93	chromosome segregation	regulation of metaphase/anaphase transition of cell cycle
GO:0000724	GO:0000724	2	GO:0006310	0.925	2.79976209058213	148	double-strand break repair via homologous recombination	DNA recombination
GO:0010965	GO:0010965	6	GO:1902099	0.941	2.79976209058213	1	regulation of mitotic sister chromatid separation	regulation of metaphase/anaphase transition of cell cycle
GO:0051052	GO:0051052	2	GO:0006310	0.722	2.79976209058213	0	regulation of DNA metabolic process	DNA recombination
GO:0045071	GO:0045071	14	GO:0045069	0.973	2.79976209058213	55	negative regulation of viral genome replication	regulation of viral genome replication
GO:0140527	GO:0140527	2	GO:0006310	0.846	2.79976209058213	0	reciprocal homologous recombination	DNA recombination
GO:0030593	GO:0030593	11	GO:0071621	0.972	2.79976209058213	92	neutrophil chemotaxis	granulocyte chemotaxis
GO:0071219	GO:0071219	13	GO:0032496	0.949	2.79976209058213	6	cellular response to molecule of bacterial origin	response to lipopolysaccharide
GO:0051225	GO:0051225	5	GO:0007052	0.919	2.79976209058213	46	spindle assembly	mitotic spindle organization
GO:0030071	GO:0030071	6	GO:1902099	0.996	2.79976209058213	37	regulation of mitotic metaphase/anaphase transition	regulation of metaphase/anaphase transition of cell cycle
GO:0044772	GO:0044772	4	GO:0071173	0.781	2.79976209058213	24	mitotic cell cycle phase transition	spindle assembly checkpoint signaling
GO:0007088	GO:0007088	8	GO:0051783	0.983	2.79976209058213	27	regulation of mitotic nuclear division	regulation of nuclear division
GO:0051347	GO:0051347	16	GO:0051338	0.943	2.79976209058213	0	positive regulation of transferase activity	regulation of transferase activity
GO:0019953	GO:0019953	1	GO:0045143	0.64	2.79976209058213	9	sexual reproduction	homologous chromosome segregation
GO:1902750	GO:1902750	4	GO:0071173	0.784	2.79976209058213	2	negative regulation of cell cycle G2/M phase transition	spindle assembly checkpoint signaling
GO:0071345	GO:0071345	3	GO:0034097	0.974	2.79976209058213	33	cellular response to cytokine stimulus	response to cytokine
GO:0007098	GO:0007098	5	GO:0007052	0.71	2.79976209058213	55	centrosome cycle	mitotic spindle organization
GO:0030261	GO:0030261	9	GO:0032508	0.567	2.79976209058213	22	chromosome condensation	DNA duplex unwinding
GO:0006959	GO:0006959	18	GO:0006959	0.997	2.79976209058213	60	humoral immune response	humoral immune response
GO:0090068	GO:0090068	4	GO:0071173	0.694	2.79976209058213	2	positive regulation of cell cycle process	spindle assembly checkpoint signaling
GO:0098542	GO:0098542	12	GO:0006302	0.527	2.79976209058213	1	defense response to other organism	double-strand break repair
GO:0006954	GO:0006954	12	GO:0006302	0.496	2.79976209058213	423	inflammatory response	double-strand break repair
GO:1903083	GO:1903083	10	GO:0051303	0.391	2.79976209058213	0	protein localization to condensed chromosome	establishment of chromosome localization
GO:0051656	GO:0051656	10	GO:0051303	0.863	2.79976209058213	3	establishment of organelle localization	establishment of chromosome localization
GO:0070192	GO:0070192	1	GO:0045143	0.81	2.79976209058213	5	chromosome organization involved in meiotic cell cycle	homologous chromosome segregation
GO:1905818	GO:1905818	6	GO:1902099	0.948	2.79976209058213	3	regulation of chromosome separation	regulation of metaphase/anaphase transition of cell cycle
GO:0006334	GO:0006334	15	GO:0071824	0.941	2.79976209058213	169	nucleosome assembly	protein-DNA complex subunit organization
GO:0031570	GO:0031570	4	GO:0071173	0.865	2.79976209058213	0	DNA integrity checkpoint signaling	spindle assembly checkpoint signaling
GO:0032392	GO:0032392	9	GO:0032508	0.99	2.79976209058213	4	DNA geometric change	DNA duplex unwinding
GO:0000075	GO:0000075	4	GO:0071173	0.893	2.79976209058213	0	cell cycle checkpoint signaling	spindle assembly checkpoint signaling
GO:1902751	GO:1902751	4	GO:0071173	0.672	2.79576818531665	4	positive regulation of cell cycle G2/M phase transition	spindle assembly checkpoint signaling
GO:0061844	GO:0061844	18	GO:0006959	0.883	2.79576818531665	94	antimicrobial humoral immune response mediated by antimicrobial peptide	humoral immune response
GO:1904666	GO:1904666	16	GO:0051338	0.702	2.79576818531665	1	regulation of ubiquitin protein ligase activity	regulation of transferase activity
GO:0010971	GO:0010971	4	GO:0071173	0.662	2.79576818531665	28	positive regulation of G2/M transition of mitotic cell cycle	spindle assembly checkpoint signaling
GO:0051315	GO:0051315	6	GO:1902099	0.744	2.79576818531665	15	attachment of mitotic spindle microtubules to kinetochore	regulation of metaphase/anaphase transition of cell cycle
GO:0051382	GO:0051382	9	GO:0032508	0.523	2.79576818531665	17	kinetochore assembly	DNA duplex unwinding
GO:0032467	GO:0032467	7	GO:0051301	0.793	2.79576818531665	47	positive regulation of cytokinesis	cell division
GO:0032504	GO:0032504	1	GO:0045143	0.638	2.6518838745165	0	multicellular organism reproduction	homologous chromosome segregation
GO:0071396	GO:0071396	3	GO:0034097	0.591	2.6518838745165	4	cellular response to lipid	response to cytokine
GO:0045859	GO:0045859	16	GO:0051338	0.959	2.6518838745165	17	regulation of protein kinase activity	regulation of transferase activity
GO:0048609	GO:0048609	1	GO:0045143	0.637	2.6518838745165	4	multicellular organismal reproductive process	homologous chromosome segregation
GO:0051129	GO:0051129	8	GO:0051783	0.593	2.6518838745165	0	negative regulation of cellular component organization	regulation of nuclear division
GO:0044843	GO:0044843	4	GO:0071173	0.742	2.63138758187553	2	cell cycle G1/S phase transition	spindle assembly checkpoint signaling
GO:0042770	GO:0042770	12	GO:0006302	0.702	2.61154570793385	10	signal transduction in response to DNA damage	double-strand break repair
GO:0007076	GO:0007076	9	GO:0032508	0.537	2.52011992084162	30	mitotic chromosome condensation	DNA duplex unwinding
GO:0070925	GO:0070925	15	GO:0071824	0.382	2.5020157581733	6	organelle assembly	protein-DNA complex subunit organization
GO:0043549	GO:0043549	16	GO:0051338	0.976	2.50174280581569	6	regulation of kinase activity	regulation of transferase activity
GO:0000082	GO:0000082	4	GO:0071173	0.735	2.46565000734852	77	G1/S transition of mitotic cell cycle	spindle assembly checkpoint signaling
GO:0099565	GO:0099565	19	GO:0099565	0.999	2.46302051520036	0	chemical synaptic transmission, postsynaptic	chemical synaptic transmission, postsynaptic
GO:0060078	GO:0060078	20	GO:0060078	0.999	2.4587101644891	25	regulation of postsynaptic membrane potential	regulation of postsynaptic membrane potential
GO:0019058	GO:0019058	14	GO:0045069	0.886	2.4587101644891	5	viral life cycle	regulation of viral genome replication
GO:0071356	GO:0071356	3	GO:0034097	0.828	2.45822106374511	139	cellular response to tumor necrosis factor	response to cytokine
GO:0030595	GO:0030595	11	GO:0071621	0.922	2.45822106374511	13	leukocyte chemotaxis	granulocyte chemotaxis
GO:0097529	GO:0097529	11	GO:0071621	0.935	2.45717897371284	4	myeloid leukocyte migration	granulocyte chemotaxis
GO:2000045	GO:2000045	4	GO:0071173	0.757	2.4560065510364	55	regulation of G1/S transition of mitotic cell cycle	spindle assembly checkpoint signaling
GO:0000077	GO:0000077	4	GO:0071173	0.855	2.44531605406044	38	DNA damage checkpoint signaling	spindle assembly checkpoint signaling
GO:0044774	GO:0044774	4	GO:0071173	0.835	2.44019846385946	2	mitotic DNA integrity checkpoint signaling	spindle assembly checkpoint signaling
GO:1903900	GO:1903900	14	GO:0045069	0.964	2.44019846385946	2	regulation of viral life cycle	regulation of viral genome replication
GO:0044818	GO:0044818	4	GO:0071173	0.813	2.41633112920555	23	mitotic G2/M transition checkpoint	spindle assembly checkpoint signaling
GO:0051438	GO:0051438	16	GO:0051338	0.752	2.41198183459729	3	regulation of ubiquitin-protein transferase activity	regulation of transferase activity
GO:1902808	GO:1902808	4	GO:0071173	0.704	2.40177769686761	16	positive regulation of cell cycle G1/S phase transition	spindle assembly checkpoint signaling
GO:0040001	GO:0040001	10	GO:0051303	0.714	2.40177769686761	7	establishment of mitotic spindle localization	establishment of chromosome localization
GO:0046605	GO:0046605	5	GO:0007052	0.654	2.40177769686761	7	regulation of centrosome cycle	mitotic spindle organization
GO:0019730	GO:0019730	18	GO:0006959	0.924	2.39054747072788	13	antimicrobial humoral response	humoral immune response
GO:0031663	GO:0031663	13	GO:0032496	0.87	2.38955698851505	40	lipopolysaccharide-mediated signaling pathway	response to lipopolysaccharide
GO:0032506	GO:0032506	7	GO:0051301	0.793	2.38955698851505	4	cytokinetic process	cell division
GO:0051307	GO:0051307	6	GO:1902099	0.703	2.38955698851505	1	meiotic chromosome separation	regulation of metaphase/anaphase transition of cell cycle
GO:1900264	GO:1900264	2	GO:0006310	0.512	2.38902689606599	13	positive regulation of DNA-directed DNA polymerase activity	DNA recombination
GO:1900262	GO:1900262	2	GO:0006310	0.512	2.38902689606599	0	regulation of DNA-directed DNA polymerase activity	DNA recombination
GO:0002696	GO:0002696	21	GO:0002696	0.996	2.37507463917568	0	positive regulation of leukocyte activation	positive regulation of leukocyte activation
GO:0031396	GO:0031396	22	GO:0031396	0.998	2.36333712105136	19	regulation of protein ubiquitination	regulation of protein ubiquitination
GO:0031497	GO:0031497	9	GO:0032508	0.628	2.34137748460202	0	chromatin assembly	DNA duplex unwinding
GO:0072676	GO:0072676	11	GO:0071621	0.777	2.32295407802248	6	lymphocyte migration	granulocyte chemotaxis
GO:0051785	GO:0051785	8	GO:0051783	0.926	2.31091764737361	0	positive regulation of nuclear division	regulation of nuclear division
GO:0003018	GO:0003018	19	GO:0099565	0.534	2.3033445111605	0	vascular process in circulatory system	chemical synaptic transmission, postsynaptic
GO:0007019	GO:0007019	5	GO:0007052	0.649	2.3033445111605	25	microtubule depolymerization	mitotic spindle organization
GO:0031401	GO:0031401	23	GO:0031401	0.99	2.27276812573773	4	positive regulation of protein modification process	positive regulation of protein modification process
GO:0031109	GO:0031109	5	GO:0007052	0.706	2.26630558463413	1	microtubule polymerization or depolymerization	mitotic spindle organization
GO:0060079	GO:0060079	19	GO:0099565	0.991	2.24559554222891	88	excitatory postsynaptic potential	chemical synaptic transmission, postsynaptic
GO:0045444	GO:0045444	24	GO:0045444	0.998	2.24559554222891	76	fat cell differentiation	fat cell differentiation
GO:0048232	GO:0048232	1	GO:0045143	0.612	2.23925068528932	4	male gamete generation	homologous chromosome segregation
GO:0050867	GO:0050867	21	GO:0002696	0.992	2.23696530476851	3	positive regulation of cell activation	positive regulation of leukocyte activation
GO:0006936	GO:0006936	19	GO:0099565	0.556	2.23568837377749	91	muscle contraction	chemical synaptic transmission, postsynaptic
GO:0045840	GO:0045840	8	GO:0051783	0.906	2.22228642142363	33	positive regulation of mitotic nuclear division	regulation of nuclear division
GO:1902969	GO:1902969	2	GO:0006310	0.514	2.21655680643651	1	mitotic DNA replication	DNA recombination
GO:0010506	GO:0010506	25	GO:0010506	0.997	2.2064864632074	81	regulation of autophagy	regulation of autophagy
GO:0042391	GO:0042391	20	GO:0060078	0.865	2.20129749814479	112	regulation of membrane potential	regulation of postsynaptic membrane potential
GO:0071897	GO:0071897	2	GO:0006310	0.654	2.17759748707133	30	DNA biosynthetic process	DNA recombination
GO:0050792	GO:0050792	14	GO:0045069	0.947	2.15692452416421	1	regulation of viral process	regulation of viral genome replication
GO:0010212	GO:0010212	26	GO:0010212	0.999	2.15652051481347	41	response to ionizing radiation	response to ionizing radiation
GO:2000241	GO:2000241	1	GO:0045143	0.566	2.15212285133868	2	regulation of reproductive process	homologous chromosome segregation
GO:0000727	GO:0000727	2	GO:0006310	0.736	2.14556118168103	12	double-strand break repair via break-induced replication	DNA recombination
GO:0003012	GO:0003012	19	GO:0099565	0.57	2.13169693108844	2	muscle system process	chemical synaptic transmission, postsynaptic
GO:0051293	GO:0051293	10	GO:0051303	0.733	2.11140986260492	7	establishment of spindle localization	establishment of chromosome localization
GO:1903039	GO:1903039	27	GO:1903039	0.997	2.11140986260492	3	positive regulation of leukocyte cell-cell adhesion	positive regulation of leukocyte cell-cell adhesion
GO:0002250	GO:0002250	18	GO:0006959	0.636	2.09682718302937	433	adaptive immune response	humoral immune response
GO:0060326	GO:0060326	11	GO:0071621	0.9	2.09511844346231	75	cell chemotaxis	granulocyte chemotaxis
GO:0051781	GO:0051781	7	GO:0051301	0.833	2.08947023445087	47	positive regulation of cell division	cell division
GO:0060047	GO:0060047	19	GO:0099565	0.556	2.08055315320673	22	heart contraction	chemical synaptic transmission, postsynaptic
GO:0003015	GO:0003015	19	GO:0099565	0.558	2.08055315320673	6	heart process	chemical synaptic transmission, postsynaptic
GO:0002694	GO:0002694	21	GO:0002696	0.944	2.07812115271864	0	regulation of leukocyte activation	positive regulation of leukocyte activation
GO:0044057	GO:0044057	19	GO:0099565	0.585	2.06979839299098	0	regulation of system process	chemical synaptic transmission, postsynaptic
GO:0006914	GO:0006914	25	GO:0010506	0.915	2.06979839299098	157	autophagy	regulation of autophagy
GO:0048247	GO:0048247	11	GO:0071621	0.816	2.06979839299098	34	lymphocyte chemotaxis	granulocyte chemotaxis
GO:0002831	GO:0002831	13	GO:0032496	0.64	2.06979839299098	0	regulation of response to biotic stimulus	response to lipopolysaccharide
GO:0061919	GO:0061919	25	GO:0010506	0.915	2.06979839299098	0	process utilizing autophagic mechanism	regulation of autophagy
GO:0050900	GO:0050900	11	GO:0071621	0.872	2.06724175660211	27	leukocyte migration	granulocyte chemotaxis
GO:0071674	GO:0071674	11	GO:0071621	0.816	2.03145048059562	3	mononuclear cell migration	granulocyte chemotaxis
GO:2001020	GO:2001020	12	GO:0006302	0.743	2.0302704775723	15	regulation of response to DNA damage stimulus	double-strand break repair
GO:0045740	GO:0045740	2	GO:0006310	0.558	2.0248958677845	30	positive regulation of DNA replication	DNA recombination
GO:0050729	GO:0050729	12	GO:0006302	0.418	2.0248958677845	115	positive regulation of inflammatory response	double-strand break repair
GO:0071347	GO:0071347	3	GO:0034097	0.772	2.01891679376871	86	cellular response to interleukin-1	response to cytokine
GO:0070098	GO:0070098	3	GO:0034097	0.764	2.00886732766202	78	chemokine-mediated signaling pathway	response to cytokine
GO:0051249	GO:0051249	21	GO:0002696	0.93	2.00886732766202	1	regulation of lymphocyte activation	positive regulation of leukocyte activation
GO:0001775	GO:0001775	21	GO:0002696	0.855	2.00886732766202	13	cell activation	positive regulation of leukocyte activation
GO:0031347	GO:0031347	12	GO:0006302	0.484	1.99657086387161	0	regulation of defense response	double-strand break repair
GO:0050865	GO:0050865	21	GO:0002696	0.935	1.99380452338755	1	regulation of cell activation	positive regulation of leukocyte activation
GO:0051251	GO:0051251	21	GO:0002696	0.986	1.99061524873814	2	positive regulation of lymphocyte activation	positive regulation of leukocyte activation
GO:0019216	GO:0019216	28	GO:0019216	0.997	1.97962400153993	42	regulation of lipid metabolic process	regulation of lipid metabolic process
GO:0000018	GO:0000018	2	GO:0006310	0.895	1.97278397955924	6	regulation of DNA recombination	DNA recombination
GO:0006650	GO:0006650	28	GO:0019216	0.648	1.96821778467941	4	glycerophospholipid metabolic process	regulation of lipid metabolic process
GO:1903322	GO:1903322	22	GO:0031396	0.929	1.9660441279021	0	positive regulation of protein modification by small protein conjugation or removal	regulation of protein ubiquitination
GO:0090224	GO:0090224	5	GO:0007052	0.858	1.96025048355281	0	regulation of spindle organization	mitotic spindle organization
GO:0006282	GO:0006282	12	GO:0006302	0.794	1.96017999785465	43	regulation of DNA repair	double-strand break repair
GO:0140352	GO:0140352	29	GO:0140352	0.99	1.95826685046022	0	export from cell	export from cell
GO:0031349	GO:0031349	12	GO:0006302	0.448	1.91501157527119	0	positive regulation of defense response	double-strand break repair
GO:0050863	GO:0050863	21	GO:0002696	0.894	1.91501157527119	11	regulation of T cell activation	positive regulation of leukocyte activation
GO:0034341	GO:0034341	3	GO:0034097	0.792	1.91429669600616	28	response to interferon-gamma	response to cytokine
GO:0071900	GO:0071900	16	GO:0051338	0.898	1.91429669600616	4	regulation of protein serine/threonine kinase activity	regulation of transferase activity
GO:0044773	GO:0044773	4	GO:0071173	0.827	1.91342319276289	3	mitotic DNA damage checkpoint signaling	spindle assembly checkpoint signaling
GO:0031398	GO:0031398	22	GO:0031396	0.951	1.90792628410121	84	positive regulation of protein ubiquitination	regulation of protein ubiquitination
GO:1990868	GO:1990868	3	GO:0034097	0.773	1.9075317934351	0	response to chemokine	response to cytokine
GO:1990869	GO:1990869	3	GO:0034097	0.773	1.9075317934351	16	cellular response to chemokine	response to cytokine
GO:0032103	GO:0032103	30	GO:0032103	0.996	1.89687015207943	0	positive regulation of response to external stimulus	positive regulation of response to external stimulus
GO:0045834	GO:0045834	28	GO:0019216	0.917	1.89673533462134	1	positive regulation of lipid metabolic process	regulation of lipid metabolic process
GO:0050776	GO:0050776	18	GO:0006959	0.675	1.89673533462134	43	regulation of immune response	humoral immune response
GO:0045005	GO:0045005	2	GO:0006310	0.588	1.8866284701891	0	DNA-templated DNA replication maintenance of fidelity	DNA recombination
GO:0006644	GO:0006644	28	GO:0019216	0.661	1.8866284701891	58	phospholipid metabolic process	regulation of lipid metabolic process
GO:0002684	GO:0002684	18	GO:0006959	0.539	1.88207581983923	1	positive regulation of immune system process	humoral immune response
GO:1903320	GO:1903320	22	GO:0031396	0.981	1.88085729903688	0	regulation of protein modification by small protein conjugation or removal	regulation of protein ubiquitination
GO:0003006	GO:0003006	1	GO:0045143	0.651	1.88060861278226	5	developmental process involved in reproduction	homologous chromosome segregation
GO:0007095	GO:0007095	4	GO:0071173	0.781	1.87125330443834	40	mitotic G2 DNA damage checkpoint signaling	spindle assembly checkpoint signaling
GO:0050870	GO:0050870	27	GO:1903039	0.99	1.86687159426855	40	positive regulation of T cell activation	positive regulation of leukocyte cell-cell adhesion
GO:0001659	GO:0001659	20	GO:0060078	0.404	1.86687159426855	20	temperature homeostasis	regulation of postsynaptic membrane potential
GO:0034728	GO:0034728	15	GO:0071824	0.958	1.8657682492257	6	nucleosome organization	protein-DNA complex subunit organization
GO:0045321	GO:0045321	21	GO:0002696	0.871	1.85408911592669	5	leukocyte activation	positive regulation of leukocyte activation
GO:0062012	GO:0062012	31	GO:0062012	0.997	1.85408911592669	0	regulation of small molecule metabolic process	regulation of small molecule metabolic process
GO:0045860	GO:0045860	16	GO:0051338	0.911	1.8517178656638	64	positive regulation of protein kinase activity	regulation of transferase activity
GO:0034612	GO:0034612	3	GO:0034097	0.836	1.84949104137861	29	response to tumor necrosis factor	response to cytokine
GO:1902905	GO:1902905	8	GO:0051783	0.527	1.83988560380721	1	positive regulation of supramolecular fiber organization	regulation of nuclear division
GO:0002377	GO:0002377	18	GO:0006959	0.446	1.83805606777667	94	immunoglobulin production	humoral immune response
GO:0001817	GO:0001817	32	GO:0001817	0.987	1.83653281264929	45	regulation of cytokine production	regulation of cytokine production
GO:0001819	GO:0001819	32	GO:0001817	0.928	1.83653281264929	67	positive regulation of cytokine production	regulation of cytokine production
GO:0120163	GO:0120163	33	GO:0120163	1	1.83430588386982	47	negative regulation of cold-induced thermogenesis	negative regulation of cold-induced thermogenesis
GO:0120161	GO:0120161	33	GO:0120163	0.923	1.83147713440032	3	regulation of cold-induced thermogenesis	negative regulation of cold-induced thermogenesis
GO:0106106	GO:0106106	33	GO:0120163	0.923	1.83147713440032	0	cold-induced thermogenesis	negative regulation of cold-induced thermogenesis
GO:0032101	GO:0032101	30	GO:0032103	0.905	1.82855294305826	0	regulation of response to external stimulus	positive regulation of response to external stimulus
GO:0050727	GO:0050727	12	GO:0006302	0.458	1.81282144308728	109	regulation of inflammatory response	double-strand break repair
GO:0072698	GO:0072698	10	GO:0051303	0.419	1.79571086258694	0	protein localization to microtubule cytoskeleton	establishment of chromosome localization
GO:0044380	GO:0044380	10	GO:0051303	0.421	1.79571086258694	3	protein localization to cytoskeleton	establishment of chromosome localization
GO:0016567	GO:0016567	22	GO:0031396	0.83	1.79571086258694	680	protein ubiquitination	regulation of protein ubiquitination
GO:0032446	GO:0032446	22	GO:0031396	0.815	1.79571086258694	12	protein modification by small protein conjugation	regulation of protein ubiquitination
GO:0090257	GO:0090257	19	GO:0099565	0.536	1.79391624143914	1	regulation of muscle system process	chemical synaptic transmission, postsynaptic
GO:0031297	GO:0031297	2	GO:0006310	0.578	1.7854943139602	55	replication fork processing	DNA recombination
GO:0046486	GO:0046486	28	GO:0019216	0.666	1.78315744219785	8	glycerolipid metabolic process	regulation of lipid metabolic process
GO:0001816	GO:0001816	32	GO:0001817	0.985	1.77128835121478	7	cytokine production	regulation of cytokine production
GO:0007283	GO:0007283	1	GO:0045143	0.607	1.76798284443612	450	spermatogenesis	homologous chromosome segregation
GO:1990845	GO:1990845	33	GO:0120163	0.912	1.76797802692739	11	adaptive thermogenesis	negative regulation of cold-induced thermogenesis
GO:0016032	GO:0016032	14	GO:0045069	0.858	1.76597839546165	11	viral process	regulation of viral genome replication
GO:0034968	GO:0034968	22	GO:0031396	0.432	1.76597839546165	10	histone lysine methylation	regulation of protein ubiquitination
GO:0051053	GO:0051053	2	GO:0006310	0.632	1.76532345549568	1	negative regulation of DNA metabolic process	DNA recombination
GO:0044255	GO:0044255	28	GO:0019216	0.74	1.74847949338138	22	cellular lipid metabolic process	regulation of lipid metabolic process
GO:0070555	GO:0070555	3	GO:0034097	0.791	1.73925660779175	39	response to interleukin-1	response to cytokine
GO:0051262	GO:0051262	15	GO:0071824	0.595	1.73925660779175	23	protein tetramerization	protein-DNA complex subunit organization
GO:0071346	GO:0071346	3	GO:0034097	0.779	1.73122285321075	103	cellular response to interferon-gamma	response to cytokine
GO:0002753	GO:0002753	18	GO:0006959	0.521	1.71977015181133	7	cytoplasmic pattern recognition receptor signaling pathway	humoral immune response
GO:0042330	GO:0042330	11	GO:0071621	0.826	1.71845370876839	0	taxis	granulocyte chemotaxis
GO:0006935	GO:0006935	11	GO:0071621	0.826	1.71845370876839	117	chemotaxis	granulocyte chemotaxis
GO:0070663	GO:0070663	17	GO:0008284	0.737	1.70435355839374	2	regulation of leukocyte proliferation	positive regulation of cell population proliferation
GO:0033993	GO:0033993	3	GO:0034097	0.625	1.69840020654142	14	response to lipid	response to cytokine
GO:0046903	GO:0046903	29	GO:0140352	0.491	1.69182945547418	8	secretion	export from cell
GO:0051298	GO:0051298	5	GO:0007052	0.681	1.69182945547418	19	centrosome duplication	mitotic spindle organization
GO:0032200	GO:0032200	9	GO:0032508	0.646	1.68812459509178	27	telomere organization	DNA duplex unwinding
GO:1900087	GO:1900087	4	GO:0071173	0.692	1.68747374875489	53	positive regulation of G1/S transition of mitotic cell cycle	spindle assembly checkpoint signaling
GO:2000401	GO:2000401	11	GO:0071621	0.737	1.66264641420846	4	regulation of lymphocyte migration	granulocyte chemotaxis
GO:0006325	GO:0006325	9	GO:0032508	0.684	1.66238236475104	226	chromatin organization	DNA duplex unwinding
GO:0043066	GO:0043066	34	GO:0043066	0.991	1.66096526455212	545	negative regulation of apoptotic process	negative regulation of apoptotic process
GO:0033365	GO:0033365	10	GO:0051303	0.524	1.66096526455212	19	protein localization to organelle	establishment of chromosome localization
GO:0006941	GO:0006941	19	GO:0099565	0.531	1.65712141077896	17	striated muscle contraction	chemical synaptic transmission, postsynaptic
GO:0032648	GO:0032648	32	GO:0001817	0.71	1.64628656294197	4	regulation of interferon-beta production	regulation of cytokine production
GO:0032608	GO:0032608	32	GO:0001817	0.708	1.64628656294197	0	interferon-beta production	regulation of cytokine production
GO:0070647	GO:0070647	22	GO:0031396	0.788	1.64475878465013	0	protein modification by small protein conjugation or removal	regulation of protein ubiquitination
GO:0019752	GO:0019752	31	GO:0062012	0.678	1.6371573193885	9	carboxylic acid metabolic process	regulation of small molecule metabolic process
GO:0048525	GO:0048525	14	GO:0045069	0.91	1.6371573193885	6	negative regulation of viral process	regulation of viral genome replication
GO:0007259	GO:0007259	35	GO:0007259	0.998	1.6371573193885	53	receptor signaling pathway via JAK-STAT	receptor signaling pathway via JAK-STAT
GO:0033674	GO:0033674	16	GO:0051338	0.928	1.62994425095795	73	positive regulation of kinase activity	regulation of transferase activity
GO:0007009	GO:0007009	36	GO:0007009	0.999	1.6296401466496	25	plasma membrane organization	plasma membrane organization
GO:0043069	GO:0043069	34	GO:0043066	0.987	1.62074230092888	16	negative regulation of programmed cell death	negative regulation of apoptotic process
GO:0008015	GO:0008015	19	GO:0099565	0.586	1.62074230092888	32	blood circulation	chemical synaptic transmission, postsynaptic
GO:1901615	GO:1901615	37	GO:1901615	0.994	1.61842782024083	0	organic hydroxy compound metabolic process	organic hydroxy compound metabolic process
GO:0001501	GO:0001501	38	GO:0001501	0.995	1.61799155132591	132	skeletal system development	skeletal system development
GO:0030029	GO:0030029	39	GO:0030029	0.99	1.61789528943317	2	actin filament-based process	actin filament-based process
GO:0042445	GO:0042445	20	GO:0060078	0.429	1.61789528943317	15	hormone metabolic process	regulation of postsynaptic membrane potential
GO:0051952	GO:0051952	29	GO:0140352	0.384	1.61789528943317	0	regulation of amine transport	export from cell
GO:0015837	GO:0015837	29	GO:0140352	0.386	1.61789528943317	4	amine transport	export from cell
GO:0097746	GO:0097746	20	GO:0060078	0.406	1.61015400418458	27	blood vessel diameter maintenance	regulation of postsynaptic membrane potential
GO:0035296	GO:0035296	20	GO:0060078	0.406	1.61015400418458	0	regulation of tube diameter	regulation of postsynaptic membrane potential
GO:0035150	GO:0035150	20	GO:0060078	0.406	1.61015400418458	1	regulation of tube size	regulation of postsynaptic membrane potential
GO:0039528	GO:0039528	18	GO:0006959	0.499	1.60848773511419	3	cytoplasmic pattern recognition receptor signaling pathway in response to virus	humoral immune response
GO:0060759	GO:0060759	3	GO:0034097	0.813	1.60442277087035	0	regulation of response to cytokine stimulus	response to cytokine
GO:2000404	GO:2000404	11	GO:0071621	0.72	1.59707128570722	7	regulation of T cell migration	granulocyte chemotaxis
GO:0032787	GO:0032787	31	GO:0062012	0.645	1.58826816833738	3	monocarboxylic acid metabolic process	regulation of small molecule metabolic process
GO:0006338	GO:0006338	9	GO:0032508	0.645	1.58826816833738	227	chromatin remodeling	DNA duplex unwinding
GO:2000779	GO:2000779	12	GO:0006302	0.908	1.58826816833738	29	regulation of double-strand break repair	double-strand break repair
GO:0001934	GO:0001934	23	GO:0031401	0.959	1.58712543452355	220	positive regulation of protein phosphorylation	positive regulation of protein modification process
GO:2001252	GO:2001252	9	GO:0032508	0.594	1.58712543452355	2	positive regulation of chromosome organization	DNA duplex unwinding
GO:0007159	GO:0007159	27	GO:1903039	0.951	1.58515317024062	33	leukocyte cell-cell adhesion	positive regulation of leukocyte cell-cell adhesion
GO:0051443	GO:0051443	16	GO:0051338	0.716	1.58515317024062	22	positive regulation of ubiquitin-protein transferase activity	regulation of transferase activity
GO:0050873	GO:0050873	24	GO:0045444	0.886	1.57010191603671	33	brown fat cell differentiation	fat cell differentiation
GO:0010824	GO:0010824	5	GO:0007052	0.649	1.56736669848891	22	regulation of centrosome duplication	mitotic spindle organization
GO:0003013	GO:0003013	19	GO:0099565	0.591	1.5657066506451	0	circulatory system process	chemical synaptic transmission, postsynaptic
GO:1903037	GO:1903037	27	GO:1903039	0.962	1.5657066506451	3	regulation of leukocyte cell-cell adhesion	positive regulation of leukocyte cell-cell adhesion
GO:1904427	GO:1904427	29	GO:0140352	0.375	1.5657066506451	2	positive regulation of calcium ion transmembrane transport	export from cell
GO:0060236	GO:0060236	5	GO:0007052	0.912	1.55658876715525	24	regulation of mitotic spindle organization	mitotic spindle organization
GO:0099643	GO:0099643	29	GO:0140352	0.82	1.55658876715525	0	signal release from synapse	export from cell
GO:0007269	GO:0007269	29	GO:0140352	0.82	1.55658876715525	28	neurotransmitter secretion	export from cell
GO:0000076	GO:0000076	4	GO:0071173	0.759	1.55084771811502	12	DNA replication checkpoint signaling	spindle assembly checkpoint signaling
GO:0006271	GO:0006271	2	GO:0006310	0.527	1.55065062439943	8	DNA strand elongation involved in DNA replication	DNA recombination
GO:0051928	GO:0051928	29	GO:0140352	0.39	1.54786055726961	29	positive regulation of calcium ion transport	export from cell
GO:0072657	GO:0072657	10	GO:0051303	0.506	1.54673738216765	22	protein localization to membrane	establishment of chromosome localization
GO:0097696	GO:0097696	35	GO:0007259	0.993	1.54673738216765	1	receptor signaling pathway via STAT	receptor signaling pathway via JAK-STAT
GO:0006284	GO:0006284	12	GO:0006302	0.711	1.54652455477913	37	base-excision repair	double-strand break repair
GO:0120254	GO:0120254	40	GO:0120254	0.998	1.54652455477913	0	olefinic compound metabolic process	olefinic compound metabolic process
GO:0061448	GO:0061448	38	GO:0001501	0.302	1.54619360026246	2	connective tissue development	skeletal system development
GO:2001021	GO:2001021	12	GO:0006302	0.654	1.54619360026246	1	negative regulation of response to DNA damage stimulus	double-strand break repair
GO:1904064	GO:1904064	29	GO:0140352	0.401	1.54612696779688	1	positive regulation of cation transmembrane transport	export from cell
GO:0007129	GO:0007129	1	GO:0045143	0.975	1.53720390067219	36	homologous chromosome pairing at meiosis	homologous chromosome segregation
GO:0042327	GO:0042327	23	GO:0031401	0.653	1.52391805885734	30	positive regulation of phosphorylation	positive regulation of protein modification process
GO:0008610	GO:0008610	28	GO:0019216	0.696	1.51563054281086	20	lipid biosynthetic process	regulation of lipid metabolic process
GO:0051101	GO:0051101	16	GO:0051338	0.556	1.51457753113531	6	regulation of DNA binding	regulation of transferase activity
GO:0045937	GO:0045937	23	GO:0031401	0.66	1.51431872405146	0	positive regulation of phosphate metabolic process	positive regulation of protein modification process
GO:0010562	GO:0010562	23	GO:0031401	0.66	1.51431872405146	0	positive regulation of phosphorus metabolic process	positive regulation of protein modification process
GO:0006082	GO:0006082	31	GO:0062012	0.681	1.48602134270318	21	organic acid metabolic process	regulation of small molecule metabolic process
GO:0043436	GO:0043436	31	GO:0062012	0.679	1.48602134270318	0	oxoacid metabolic process	regulation of small molecule metabolic process
GO:0051259	GO:0051259	15	GO:0071824	0.644	1.48602134270318	17	protein complex oligomerization	protein-DNA complex subunit organization
GO:0061351	GO:0061351	17	GO:0008284	0.645	1.48602134270318	21	neural precursor cell proliferation	positive regulation of cell population proliferation
GO:0060048	GO:0060048	19	GO:0099565	0.519	1.48602134270318	52	cardiac muscle contraction	chemical synaptic transmission, postsynaptic
GO:1901976	GO:1901976	4	GO:0071173	0.796	1.47763639823271	0	regulation of cell cycle checkpoint	spindle assembly checkpoint signaling
GO:0051668	GO:0051668	10	GO:0051303	0.513	1.47703305719578	4	localization within membrane	establishment of chromosome localization
GO:0015850	GO:0015850	29	GO:0140352	0.424	1.4721275666292	0	organic hydroxy compound transport	export from cell
GO:0050877	GO:0050877	19	GO:0099565	0.748	1.46869719950979	54	nervous system process	chemical synaptic transmission, postsynaptic
GO:0010524	GO:0010524	29	GO:0140352	0.364	1.46869719950979	14	positive regulation of calcium ion transport into cytosol	export from cell
GO:0001505	GO:0001505	20	GO:0060078	0.423	1.46366715205939	4	regulation of neurotransmitter levels	regulation of postsynaptic membrane potential
GO:0010675	GO:0010675	23	GO:0031401	0.376	1.46019563160079	0	regulation of cellular carbohydrate metabolic process	positive regulation of protein modification process
GO:0022409	GO:0022409	27	GO:1903039	0.983	1.43348917408986	17	positive regulation of cell-cell adhesion	positive regulation of leukocyte cell-cell adhesion
GO:0002520	GO:0002520	18	GO:0006959	0.535	1.42838770454058	4	immune system development	humoral immune response
GO:0001525	GO:0001525	38	GO:0001501	0.416	1.42791238322806	258	angiogenesis	skeletal system development
